# Supplementary material for: Isolable dicarbon stabilized by a single phosphine ligand
Source: Springer Nature journal article supplement (doi:10.1038/s41557-020-00579-w), 2020-11-30
Supplement: 41557_2020_579_MOESM33_ESM.mol [file 41557_2020_579_MOESM33_ESM.mol]

nchem.20030804B-comp5.mol
  ChemDraw10012001472D

 65 71  0  0  0  0  0  0  0  0999 V2000
   -1.5312   -2.4413    0.0000 C   0  0  0  0  0  0  0  0  0  0  0  0
   -2.1145   -1.8580    0.0000 C   0  0  0  0  0  0  0  0  0  0  0  0
   -1.7400   -1.1229    0.0000 N   0  0  0  0  0  0  0  0  0  0  0  0
   -0.9252   -1.2520    0.0000 C   0  0  0  0  0  0  0  0  0  0  0  0
   -0.7961   -2.0668    0.0000 N   0  0  0  0  0  0  0  0  0  0  0  0
   -0.0816   -2.4793    0.0000 C   0  0  0  0  0  0  0  0  0  0  0  0
   -0.1114   -0.5303    0.0000 N   0  0  0  0  0  0  0  0  0  0  0  0
   -0.4428    1.3799    0.0000 P   0  0  0  0  0  0  0  0  0  0  0  0
    0.3418    1.6349    0.0000 N   0  0  0  0  0  0  0  0  0  0  0  0
    0.9252    1.0515    0.0000 C   0  0  0  0  0  0  0  0  0  0  0  0
    0.7961    0.2367    0.0000 N   0  0  0  0  0  0  0  0  0  0  0  0
    1.5312   -0.1379    0.0000 C   0  0  0  0  0  0  0  0  0  0  0  0
    2.1145    0.4455    0.0000 C   0  0  0  0  0  0  0  0  0  0  0  0
    1.7400    1.1806    0.0000 N   0  0  0  0  0  0  0  0  0  0  0  0
    2.1525    1.8951    0.0000 C   0  0  0  0  0  0  0  0  0  0  0  0
   -0.7742    2.4000    0.0000 C   0  0  0  0  0  0  0  0  0  0  0  0
   -0.2893    3.0674    0.0000 C   0  0  0  0  0  0  0  0  0  0  0  0
   -1.2274    1.1250    0.0000 C   0  0  0  0  0  0  0  0  0  0  0  0
   -2.1525   -0.4084    0.0000 C   0  0  0  0  0  0  0  0  0  0  0  0
   -1.5589    2.6549    0.0000 C   0  0  0  0  0  0  0  0  0  0  0  0
   -1.5589    3.4799    0.0000 C   0  0  0  0  0  0  0  0  0  0  0  0
   -2.2733    3.8924    0.0000 C   0  0  0  0  0  0  0  0  0  0  0  0
   -2.9878    3.4799    0.0000 C   0  0  0  0  0  0  0  0  0  0  0  0
   -2.9878    2.6549    0.0000 C   0  0  0  0  0  0  0  0  0  0  0  0
   -2.2733    2.2424    0.0000 C   0  0  0  0  0  0  0  0  0  0  0  0
   -0.7742    3.7348    0.0000 C   0  0  0  0  0  0  0  0  0  0  0  0
   -0.9458    4.5418    0.0000 C   0  0  0  0  0  0  0  0  0  0  0  0
   -0.1612    4.2869    0.0000 C   0  0  0  0  0  0  0  0  0  0  0  0
    0.5357    3.0674    0.0000 H   0  0  0  0  0  0  0  0  0  0  0  0
    2.9775    1.8951    0.0000 C   0  0  0  0  0  0  0  0  0  0  0  0
    3.3900    2.6095    0.0000 C   0  0  0  0  0  0  0  0  0  0  0  0
    2.9775    3.3240    0.0000 C   0  0  0  0  0  0  0  0  0  0  0  0
    2.1525    3.3240    0.0000 C   0  0  0  0  0  0  0  0  0  0  0  0
    1.7400    2.6095    0.0000 C   0  0  0  0  0  0  0  0  0  0  0  0
    0.6328   -2.0668    0.0000 C   0  0  0  0  0  0  0  0  0  0  0  0
    1.3473   -2.4793    0.0000 C   0  0  0  0  0  0  0  0  0  0  0  0
    1.3473   -3.3043    0.0000 C   0  0  0  0  0  0  0  0  0  0  0  0
    0.6328   -3.7168    0.0000 C   0  0  0  0  0  0  0  0  0  0  0  0
   -0.0816   -3.3043    0.0000 C   0  0  0  0  0  0  0  0  0  0  0  0
   -2.9775   -0.4084    0.0000 C   0  0  0  0  0  0  0  0  0  0  0  0
   -3.3900    0.3060    0.0000 C   0  0  0  0  0  0  0  0  0  0  0  0
   -2.9775    1.0205    0.0000 C   0  0  0  0  0  0  0  0  0  0  0  0
   -2.1525    1.0205    0.0000 C   0  0  0  0  0  0  0  0  0  0  0  0
   -1.7400    0.3060    0.0000 C   0  0  0  0  0  0  0  0  0  0  0  0
   -2.2733    1.4174    0.0000 C   0  0  0  0  0  0  0  0  0  0  0  0
   -1.8406    0.9753    0.0000 C   0  0  0  0  0  0  0  0  0  0  0  0
   -2.8726    1.2637    0.0000 C   0  0  0  0  0  0  0  0  0  0  0  0
   -3.3900   -1.1229    0.0000 C   0  0  0  0  0  0  0  0  0  0  0  0
   -2.9775   -1.8374    0.0000 C   0  0  0  0  0  0  0  0  0  0  0  0
   -4.2150   -1.1229    0.0000 C   0  0  0  0  0  0  0  0  0  0  0  0
   -0.9150    0.3060    0.0000 C   0  0  0  0  0  0  0  0  0  0  0  0
   -0.5025    1.0205    0.0000 C   0  0  0  0  0  0  0  0  0  0  0  0
   -0.5025   -0.4084    0.0000 C   0  0  0  0  0  0  0  0  0  0  0  0
    0.6328   -1.2418    0.0000 C   0  0  0  0  0  0  0  0  0  0  0  0
   -0.0816   -0.8293    0.0000 C   0  0  0  0  0  0  0  0  0  0  0  0
    1.3473   -0.8293    0.0000 C   0  0  0  0  0  0  0  0  0  0  0  0
   -0.7961   -3.7168    0.0000 C   0  0  0  0  0  0  0  0  0  0  0  0
   -0.7961   -4.5418    0.0000 C   0  0  0  0  0  0  0  0  0  0  0  0
   -1.5106   -3.3043    0.0000 C   0  0  0  0  0  0  0  0  0  0  0  0
    0.9150    2.6095    0.0000 C   0  0  0  0  0  0  0  0  0  0  0  0
    0.5025    1.8951    0.0000 C   0  0  0  0  0  0  0  0  0  0  0  0
    0.5025    3.3240    0.0000 C   0  0  0  0  0  0  0  0  0  0  0  0
    3.3900    1.1806    0.0000 C   0  0  0  0  0  0  0  0  0  0  0  0
    4.2150    1.1806    0.0000 C   0  0  0  0  0  0  0  0  0  0  0  0
    2.9775    0.4661    0.0000 C   0  0  0  0  0  0  0  0  0  0  0  0
 45 46  1  0      
 45 47  1  0      
 25 45  1  0      
 48 49  1  0      
 48 50  1  0      
 40 48  1  0      
 51 52  1  0      
 51 53  1  0      
 44 51  1  0      
 54 55  1  0      
 54 56  1  0      
 35 54  1  0      
 57 58  1  0      
 57 59  1  0      
 39 57  1  0      
 60 61  1  0      
 60 62  1  0      
 34 60  1  0      
 63 64  1  0      
 63 65  1  0      
 30 63  1  0      
  1  2  2  0      
  2  3  1  0      
  3  4  1  0      
  4  5  1  0      
  5  1  1  0      
  5  6  1  0      
  4  7  2  0      
  7  8  1  0      
  8  9  2  0      
  9 10  1  0      
 10 11  2  0      
 11 12  1  0      
 12 13  2  0      
 13 14  1  0      
 14 10  1  0      
 14 15  1  0      
  8 16  1  0      
 16 17  2  0      
  8 18  1  0      
 19  3  1  0      
 20 21  2  0      
 21 22  1  0      
 22 23  2  0      
 23 24  1  0      
 24 25  2  0      
 25 20  1  0      
 21 26  1  0      
 17 26  1  0      
 20 16  1  0      
 26 27  1  0      
 26 28  1  0      
 17 29  1  0      
 15 30  2  0      
 30 31  1  0      
 31 32  2  0      
 32 33  1  0      
 33 34  2  0      
 34 15  1  0      
  6 35  2  0      
 35 36  1  0      
 36 37  2  0      
 37 38  1  0      
 38 39  2  0      
 39  6  1  0      
 19 40  2  0      
 40 41  1  0      
 41 42  2  0      
 42 43  1  0      
 43 44  2  0      
 44 19  1  0      
M  STY  1   1 SUP
M  SLB  1   1   1
M  SAL   1  3  45  46  47
M  SBL   1  1   3
M  SMT   1 \Si\nPr
M  SBV   1   3    0.0000    0.8250
M  STY  1   2 SUP
M  SLB  1   2   2
M  SAL   2  3  48  49  50
M  SBL   2  1   6
M  SMT   2 \Si\nPr
M  SBV   2   6    0.4125    0.7145
M  STY  1   3 SUP
M  SLB  1   3   3
M  SAL   3  3  51  52  53
M  SBL   3  1   9
M  SMT   3 \Si\nPr
M  SBV   3   9   -0.8250    0.0000
M  STY  1   4 SUP
M  SLB  1   4   4
M  SAL   4  3  54  55  56
M  SBL   4  1  12
M  SMT   4 \Si\nPr
M  SBV   4  12    0.0000   -0.8250
M  STY  1   5 SUP
M  SLB  1   5   5
M  SAL   5  3  57  58  59
M  SBL   5  1  15
M  SMT   5 \Si\nPr
M  SBV   5  15    0.7145    0.4125
M  STY  1   6 SUP
M  SLB  1   6   6
M  SAL   6  3  60  61  62
M  SBL   6  1  18
M  SMT   6 \Si\nPr
M  SBV   6  18    0.8250    0.0000
M  STY  1   7 SUP
M  SLB  1   7   7
M  SAL   7  3  63  64  65
M  SBL   7  1  21
M  SMT   7 \Si\nPr
M  SBV   7  21   -0.4125    0.7145
M  END
