# Supplementary material for: Isolable dicarbon stabilized by a single phosphine ligand
Source: Springer Nature journal article supplement (doi:10.1038/s41557-020-00579-w), 2020-11-30
Supplement: 41557_2020_579_MOESM35_ESM.cif [file 41557_2020_579_MOESM35_ESM.cif]

####################################################################### 
# 
# This file contains crystal structure data downloaded from the 
# Cambridge Structural Database (CSD) hosted by the Cambridge 
# Crystallographic Data Centre (CCDC).
# 
# Full information about CCDC data access policies and citation 
# guidelines are available at http://www.ccdc.cam.ac.uk/access/V1 
# 
# Audit and citation data items may have been added by the CCDC. 
# Please retain this information to preserve the provenance of 
# this file and to allow appropriate attribution of the data. 
# 
#######################################################################

data_i17584
_database_code_depnum_ccdc_archive 'CCDC 1993539'
loop_
_audit_author_name
_audit_author_address
'Glenn P. A. Yap'
;Department of Chemistry and Biochemistry, University of Delaware
United States of America
;
_audit_update_record             
;
2020-03-30 deposited with the CCDC.	2020-04-24 downloaded from the CCDC.
;
_audit_creation_date             2019-11-11
_audit_creation_method           
;
Olex2 1.2
(compiled May 18 2018 14:05:52 for OlexSys, GUI svn.r5506)
;
_shelx_SHELXL_version_number     2018/3
_audit_contact_author_address    ?
_audit_contact_author_email      ?
_audit_contact_author_phone      ?
_publ_contact_author_id_orcid    ?
_publ_section_references         
;
Dolomanov, O.V., Bourhis, L.J., Gildea, R.J, Howard, J.A.K. & Puschmann, H.
 (2009), J. Appl. Cryst. 42, 339-341.

Sheldrick, G.M. (2008). Acta Cryst. A64, 112-122.
;
_chemical_name_common            ?
_chemical_name_systematic        ?
_chemical_formula_moiety         'C58 H80 N6 O P, C24 H20 B'
_chemical_formula_sum            'C82 H100 B N6 O P'
_chemical_formula_weight         1227.45
_chemical_melting_point          ?
loop_
_atom_type_symbol
_atom_type_description
_atom_type_scat_dispersion_real
_atom_type_scat_dispersion_imag
_atom_type_scat_source
C C 0.0033 0.0016 'International Tables Vol C Tables 4.2.6.8 and 6.1.1.4'
H H 0.0000 0.0000 'International Tables Vol C Tables 4.2.6.8 and 6.1.1.4'
B B 0.0013 0.0007 'International Tables Vol C Tables 4.2.6.8 and 6.1.1.4'
N N 0.0061 0.0033 'International Tables Vol C Tables 4.2.6.8 and 6.1.1.4'
O O 0.0106 0.0060 'International Tables Vol C Tables 4.2.6.8 and 6.1.1.4'
P P 0.1023 0.0942 'International Tables Vol C Tables 4.2.6.8 and 6.1.1.4'

_shelx_space_group_comment       
;
The symmetry employed for this shelxl refinement is uniquely defined
by the following loop, which should always be used as a source of
symmetry information in preference to the above space-group names.
They are only intended as comments.
;
_space_group_crystal_system      orthorhombic
_space_group_IT_number           61
_space_group_name_H-M_alt        'P b c a'
_space_group_name_Hall           '-P 2ac 2ab'
loop_
_space_group_symop_operation_xyz
'x, y, z'
'x+1/2, -y+1/2, -z'
'-x, y+1/2, -z+1/2'
'-x+1/2, -y, z+1/2'
'-x, -y, -z'
'-x-1/2, y-1/2, z'
'x, -y-1/2, z-1/2'
'x-1/2, y, -z-1/2'

_cell_length_a                   20.412(3)
_cell_length_b                   23.164(3)
_cell_length_c                   30.219(3)
_cell_angle_alpha                90
_cell_angle_beta                 90
_cell_angle_gamma                90
_cell_volume                     14289(3)
_cell_formula_units_Z            8
_cell_measurement_reflns_used    9932
_cell_measurement_temperature    100
_cell_measurement_theta_max      26.12
_cell_measurement_theta_min      2.22
_shelx_estimated_absorpt_T_max   ?
_shelx_estimated_absorpt_T_min   ?
_exptl_absorpt_coefficient_mu    0.088
_exptl_absorpt_correction_T_max  0.7455
_exptl_absorpt_correction_T_min  0.6656
_exptl_absorpt_correction_type   multi-scan
_exptl_absorpt_process_details   
;
SADABS-2016/2 (Bruker,2016) was used for absorption correction.
wR2(int) was 0.1037 before and 0.0760 after correction.
The Ratio of minimum to maximum transmission is 0.8928.
The \l/2 correction factor is Not present.
;
_exptl_absorpt_special_details   ?
_exptl_crystal_colour            colourless
_exptl_crystal_colour_primary    colourless
_exptl_crystal_density_diffrn    1.141
_exptl_crystal_density_meas      ?
_exptl_crystal_density_method    ?
_exptl_crystal_description       block
_exptl_crystal_F_000             5296
_exptl_crystal_preparation       ?
_exptl_crystal_recrystallization_method 
'Dissolved in acetone and layered by hexanes at room temperature in the air.'
_exptl_crystal_size_max          0.1
_exptl_crystal_size_mid          0.1
_exptl_crystal_size_min          0.1
_exptl_transmission_factor_max   ?
_exptl_transmission_factor_min   ?
_diffrn_reflns_av_R_equivalents  0.1131
_diffrn_reflns_av_unetI/netI     0.0325
_diffrn_reflns_Laue_measured_fraction_full 0.999
_diffrn_reflns_Laue_measured_fraction_max 0.993
_diffrn_reflns_limit_h_max       26
_diffrn_reflns_limit_h_min       -26
_diffrn_reflns_limit_k_max       29
_diffrn_reflns_limit_k_min       -29
_diffrn_reflns_limit_l_max       34
_diffrn_reflns_limit_l_min       -38
_diffrn_reflns_number            313334
_diffrn_reflns_point_group_measured_fraction_full 0.999
_diffrn_reflns_point_group_measured_fraction_max 0.993
_diffrn_reflns_theta_full        25.242
_diffrn_reflns_theta_max         27.263
_diffrn_reflns_theta_min         1.758
_diffrn_ambient_temperature      100
_diffrn_detector_area_resol_mean ?
_diffrn_measured_fraction_theta_full 0.999
_diffrn_measured_fraction_theta_max 0.993
_diffrn_measurement_device_type  'Bruker APEX-II CCD'
_diffrn_measurement_method       '\f and \w scans'
_diffrn_radiation_type           MoK\a
_diffrn_radiation_wavelength     0.71073
_diffrn_source                   ?
_diffrn_special_details          ?
_diffrn_standards_number         0
_reflns_Friedel_coverage         0.000
_reflns_Friedel_fraction_full    .
_reflns_Friedel_fraction_max     .
_reflns_number_gt                12176
_reflns_number_total             15911
_reflns_special_details          
;
 Reflections were merged by SHELXL according to the crystal
 class for the calculation of statistics and refinement.
 
 _reflns_Friedel_fraction is defined as the number of unique
 Friedel pairs measured divided by the number that would be
 possible theoretically, ignoring centric projections and
 systematic absences.
;
_reflns_threshold_expression     'I > 2\s(I)'
_computing_cell_refinement       'SAINT V8.38A (?, 2016)'
_computing_data_collection       ?
_computing_data_reduction        'SAINT V8.38A (?, 2016)'
_computing_molecular_graphics    'Olex2 (Dolomanov et al., 2009)'
_computing_publication_material  'Olex2 (Dolomanov et al., 2009)'
_computing_structure_refinement  'XL (Sheldrick, 2008)'
_computing_structure_solution    'SHELXT 2014/5 (Sheldrick, 2014)'
_refine_diff_density_max         0.597
_refine_diff_density_min         -0.611
_refine_diff_density_rms         0.048
_refine_ls_extinction_coef       .
_refine_ls_extinction_method     none
_refine_ls_goodness_of_fit_ref   1.040
_refine_ls_hydrogen_treatment    constr
_refine_ls_matrix_type           full
_refine_ls_number_parameters     838
_refine_ls_number_reflns         15911
_refine_ls_number_restraints     0
_refine_ls_R_factor_all          0.0683
_refine_ls_R_factor_gt           0.0463
_refine_ls_restrained_S_all      1.040
_refine_ls_shift/su_max          0.000
_refine_ls_shift/su_mean         0.000
_refine_ls_structure_factor_coef Fsqd
_refine_ls_weighting_details     
'w=1/[\s^2^(Fo^2^)+(0.0439P)^2^+10.3862P] where P=(Fo^2^+2Fc^2^)/3'
_refine_ls_weighting_scheme      calc
_refine_ls_wR_factor_gt          0.1070
_refine_ls_wR_factor_ref         0.1219
_refine_special_details          ?
_olex2_refinement_description    
;
1. Fixed Uiso
 At 1.2 times of:
  All C(H) groups
 At 1.5 times of:
  All C(H,H,H) groups
2.a Ternary CH refined with riding coordinates:
 C12(H12), C15(H15), C26(H26), C29(H29), C39(H39), C42(H42), C53(H53), C56(H56)
2.b Aromatic/amide H refined with riding coordinates:
 C2(H2), C3(H3), C7(H7), C8(H8), C9(H9), C18(H18), C19(H19), C21(H21),
 C22(H22), C23(H23), C34(H34), C35(H35), C36(H36), C45(H45), C46(H46), C48(H48),
  C49(H49), C50(H50), C59(H59), C60(H60), C61(H61), C62(H62), C63(H63),
 C65(H65), C66(H66), C67(H67), C68(H68), C69(H69), C71(H71), C72(H72), C73(H73),
  C74(H74), C75(H75), C77(H77), C78(H78), C79(H79), C80(H80), C81(H81)
2.c Idealised Me refined as rotating group:
 C1(H1A,H1B,H1C), C4(H4A,H4B,H4C), C13(H13A,H13B,H13C), C14(H14A,H14B,H14C),
 C16(H16A,H16B,H16C), C17(H17A,H17B,H17C), C27(H27A,H27B,H27C), C28(H28A,H28B,
 H28C), C30(H30A,H30B,H30C), C31(H31A,H31B,H31C), C40(H40A,H40B,H40C), C41(H41A,
 H41B,H41C), C43(H43A,H43B,H43C), C44(H44A,H44B,H44C), C54(H54A,H54B,H54C),
 C55(H55A,H55B,H55C), C57(H57A,H57B,H57C), C58(H58A,H58B,H58C)
;
_atom_sites_solution_hydrogens   geom
_atom_sites_solution_primary     ?
_atom_sites_solution_secondary   ?
loop_
_atom_site_label
_atom_site_type_symbol
_atom_site_fract_x
_atom_site_fract_y
_atom_site_fract_z
_atom_site_U_iso_or_equiv
_atom_site_adp_type
_atom_site_occupancy
_atom_site_site_symmetry_order
_atom_site_calc_flag
_atom_site_refinement_flags_posn
_atom_site_refinement_flags_adp
_atom_site_refinement_flags_occupancy
_atom_site_disorder_assembly
_atom_site_disorder_group
P1 P 0.78228(2) 0.51317(2) 0.38877(2) 0.01818(9) Uani 1 1 d . . . . .
O1 O 0.72582(7) 0.66634(5) 0.43644(5) 0.0373(3) Uani 1 1 d . . . . .
N1 N 0.76390(7) 0.48007(6) 0.43299(4) 0.0207(3) Uani 1 1 d . . . . .
N2 N 0.81501(6) 0.46012(5) 0.50202(4) 0.0168(3) Uani 1 1 d . . . . .
N3 N 0.82228(6) 0.39221(6) 0.45283(4) 0.0174(3) Uani 1 1 d . . . . .
N4 N 0.74129(7) 0.49213(6) 0.34666(4) 0.0186(3) Uani 1 1 d . . . . .
N5 N 0.75900(6) 0.54841(5) 0.27971(4) 0.0170(3) Uani 1 1 d . . . . .
N6 N 0.65836(6) 0.53294(5) 0.30068(4) 0.0173(3) Uani 1 1 d . . . . .
C1 C 0.86886(8) 0.50566(8) 0.37992(6) 0.0264(4) Uani 1 1 d . . . . .
H1A H 0.891865 0.515561 0.406564 0.040 Uiso 1 1 calc GR . . . .
H1B H 0.882354 0.530939 0.356454 0.040 Uiso 1 1 calc GR . . . .
H1C H 0.878632 0.466457 0.372002 0.040 Uiso 1 1 calc GR . . . .
C2 C 0.76457(9) 0.58790(7) 0.39631(6) 0.0263(4) Uani 1 1 d . . . . .
H2 H 0.771180 0.612666 0.372501 0.032 Uiso 1 1 calc R . . . .
C3 C 0.74266(9) 0.61011(7) 0.43362(6) 0.0269(4) Uani 1 1 d . . . . .
H3 H 0.738734 0.586641 0.458448 0.032 Uiso 1 1 calc R . . . .
C4 C 0.70337(12) 0.68593(9) 0.47880(7) 0.0431(5) Uani 1 1 d . . . . .
H4A H 0.683768 0.723388 0.475740 0.065 Uiso 1 1 calc GR . . . .
H4B H 0.739774 0.688224 0.498838 0.065 Uiso 1 1 calc GR . . . .
H4C H 0.671535 0.659292 0.490196 0.065 Uiso 1 1 calc GR . . . .
C5 C 0.79918(7) 0.44702(7) 0.45937(5) 0.0171(3) Uani 1 1 d . . . . .
C6 C 0.84047(8) 0.55809(7) 0.52677(5) 0.0223(3) Uani 1 1 d . . . . .
C7 C 0.82307(9) 0.60587(8) 0.55236(6) 0.0295(4) Uani 1 1 d . . . . .
H7 H 0.851631 0.637046 0.554324 0.035 Uiso 1 1 calc R . . . .
C8 C 0.76420(10) 0.60765(8) 0.57480(6) 0.0322(4) Uani 1 1 d . . . . .
H8 H 0.753501 0.639832 0.591724 0.039 Uiso 1 1 calc R . . . .
C9 C 0.72105(9) 0.56167(8) 0.57220(6) 0.0285(4) Uani 1 1 d . . . . .
H9 H 0.681268 0.563676 0.587119 0.034 Uiso 1 1 calc R . . . .
C10 C 0.73607(8) 0.51220(7) 0.54757(5) 0.0231(3) Uani 1 1 d . . . . .
C11 C 0.79629(8) 0.51192(7) 0.52535(5) 0.0192(3) Uani 1 1 d . . . . .
C12 C 0.90607(8) 0.55691(7) 0.50314(6) 0.0241(4) Uani 1 1 d . . . . .
H12 H 0.906089 0.523738 0.483004 0.029 Uiso 1 1 calc R . . . .
C13 C 0.91775(10) 0.61149(9) 0.47539(7) 0.0372(5) Uani 1 1 d . . . . .
H13A H 0.882518 0.616195 0.454666 0.056 Uiso 1 1 calc GR . . . .
H13B H 0.958381 0.607880 0.459631 0.056 Uiso 1 1 calc GR . . . .
H13C H 0.919669 0.644513 0.494545 0.056 Uiso 1 1 calc GR . . . .
C14 C 0.96173(9) 0.54849(9) 0.53625(6) 0.0329(4) Uani 1 1 d . . . . .
H14A H 0.959755 0.578206 0.558353 0.049 Uiso 1 1 calc GR . . . .
H14B H 1.002982 0.550572 0.521071 0.049 Uiso 1 1 calc GR . . . .
H14C H 0.957465 0.511413 0.550139 0.049 Uiso 1 1 calc GR . . . .
C15 C 0.68799(9) 0.46246(8) 0.54489(6) 0.0288(4) Uani 1 1 d . . . . .
H15 H 0.711762 0.428713 0.533728 0.035 Uiso 1 1 calc R . . . .
C16 C 0.63374(10) 0.47631(9) 0.51205(7) 0.0373(5) Uani 1 1 d . . . . .
H16A H 0.609993 0.509655 0.521981 0.056 Uiso 1 1 calc GR . . . .
H16B H 0.604425 0.444018 0.509914 0.056 Uiso 1 1 calc GR . . . .
H16C H 0.652552 0.483990 0.483540 0.056 Uiso 1 1 calc GR . . . .
C17 C 0.65891(10) 0.44640(10) 0.58993(7) 0.0402(5) Uani 1 1 d . . . . .
H17A H 0.693694 0.438343 0.610399 0.060 Uiso 1 1 calc GR . . . .
H17B H 0.631741 0.412815 0.586798 0.060 Uiso 1 1 calc GR . . . .
H17C H 0.633055 0.477956 0.600837 0.060 Uiso 1 1 calc GR . . . .
C18 C 0.84734(8) 0.41394(7) 0.52177(5) 0.0187(3) Uani 1 1 d . . . . .
H18 H 0.863086 0.412535 0.550634 0.022 Uiso 1 1 calc R . . . .
C19 C 0.85156(8) 0.37195(7) 0.49152(5) 0.0193(3) Uani 1 1 d . . . . .
H19 H 0.870552 0.335835 0.495559 0.023 Uiso 1 1 calc R . . . .
C20 C 0.74472(8) 0.33841(7) 0.40736(6) 0.0234(3) Uani 1 1 d . . . . .
C21 C 0.73416(9) 0.30126(8) 0.37187(6) 0.0304(4) Uani 1 1 d . . . . .
H21 H 0.691713 0.289243 0.365531 0.036 Uiso 1 1 calc R . . . .
C22 C 0.78524(10) 0.28181(8) 0.34585(6) 0.0342(4) Uani 1 1 d . . . . .
H22 H 0.776973 0.256774 0.322450 0.041 Uiso 1 1 calc R . . . .
C23 C 0.84850(9) 0.29948(8) 0.35454(6) 0.0282(4) Uani 1 1 d . . . . .
H23 H 0.882527 0.285932 0.336904 0.034 Uiso 1 1 calc R . . . .
C24 C 0.86240(8) 0.33717(7) 0.38916(5) 0.0214(3) Uani 1 1 d . . . . .
C25 C 0.80947(8) 0.35604(7) 0.41493(5) 0.0200(3) Uani 1 1 d . . . . .
C26 C 0.68734(8) 0.35487(8) 0.43671(6) 0.0262(4) Uani 1 1 d . . . . .
H26 H 0.702587 0.384426 0.457509 0.031 Uiso 1 1 calc R . . . .
C27 C 0.66495(11) 0.30262(10) 0.46374(8) 0.0453(5) Uani 1 1 d . . . . .
H27A H 0.650686 0.272595 0.444076 0.068 Uiso 1 1 calc GR . . . .
H27B H 0.629368 0.313686 0.482699 0.068 Uiso 1 1 calc GR . . . .
H27C H 0.700756 0.288789 0.481402 0.068 Uiso 1 1 calc GR . . . .
C28 C 0.63102(10) 0.38034(9) 0.41037(7) 0.0361(4) Uani 1 1 d . . . . .
H28A H 0.646341 0.413023 0.393810 0.054 Uiso 1 1 calc GR . . . .
H28B H 0.596958 0.392351 0.430244 0.054 Uiso 1 1 calc GR . . . .
H28C H 0.614149 0.351740 0.390403 0.054 Uiso 1 1 calc GR . . . .
C29 C 0.93314(8) 0.35255(7) 0.39916(5) 0.0234(3) Uani 1 1 d . . . . .
H29 H 0.933357 0.383979 0.420866 0.028 Uiso 1 1 calc R . . . .
C30 C 0.96762(9) 0.30022(8) 0.41983(6) 0.0329(4) Uani 1 1 d . . . . .
H30A H 0.943275 0.287282 0.445137 0.049 Uiso 1 1 calc GR . . . .
H30B H 1.011036 0.310995 0.428833 0.049 Uiso 1 1 calc GR . . . .
H30C H 0.970132 0.269639 0.398454 0.049 Uiso 1 1 calc GR . . . .
C31 C 0.97161(9) 0.37238(8) 0.35854(6) 0.0303(4) Uani 1 1 d . . . . .
H31A H 0.972632 0.341879 0.337046 0.046 Uiso 1 1 calc GR . . . .
H31B H 1.015562 0.382006 0.367116 0.046 Uiso 1 1 calc GR . . . .
H31C H 0.950827 0.405725 0.345937 0.046 Uiso 1 1 calc GR . . . .
C32 C 0.72219(7) 0.52290(6) 0.31236(5) 0.0166(3) Uani 1 1 d . . . . .
C33 C 0.85634(8) 0.49192(7) 0.26020(5) 0.0207(3) Uani 1 1 d . . . . .
C34 C 0.92416(9) 0.49012(8) 0.25486(6) 0.0275(4) Uani 1 1 d . . . . .
H34 H 0.944030 0.455637 0.246606 0.033 Uiso 1 1 calc R . . . .
C35 C 0.96240(9) 0.53844(8) 0.26157(6) 0.0315(4) Uani 1 1 d . . . . .
H35 H 1.007526 0.536094 0.257754 0.038 Uiso 1 1 calc R . . . .
C36 C 0.93445(8) 0.59008(8) 0.27387(6) 0.0268(4) Uani 1 1 d . . . . .
H36 H 0.960805 0.622466 0.277589 0.032 Uiso 1 1 calc R . . . .
C37 C 0.86687(8) 0.59444(7) 0.28083(5) 0.0207(3) Uani 1 1 d . . . . .
C38 C 0.82924(8) 0.54456(7) 0.27416(5) 0.0184(3) Uani 1 1 d . . . . .
C39 C 0.81467(8) 0.43975(7) 0.24860(5) 0.0230(3) Uani 1 1 d . . . . .
H39 H 0.776550 0.439696 0.268319 0.028 Uiso 1 1 calc R . . . .
C40 C 0.85013(10) 0.38226(8) 0.25442(7) 0.0370(5) Uani 1 1 d . . . . .
H40A H 0.884192 0.379004 0.232657 0.056 Uiso 1 1 calc GR . . . .
H40B H 0.819530 0.351151 0.250757 0.056 Uiso 1 1 calc GR . . . .
H40C H 0.868964 0.380457 0.283492 0.056 Uiso 1 1 calc GR . . . .
C41 C 0.78974(12) 0.44502(9) 0.20130(7) 0.0413(5) Uani 1 1 d . . . . .
H41A H 0.764731 0.479904 0.198325 0.062 Uiso 1 1 calc GR . . . .
H41B H 0.762503 0.412445 0.194444 0.062 Uiso 1 1 calc GR . . . .
H41C H 0.826271 0.446044 0.181309 0.062 Uiso 1 1 calc GR . . . .
C42 C 0.83810(8) 0.65184(7) 0.29456(6) 0.0262(4) Uani 1 1 d . . . . .
H42 H 0.792749 0.645272 0.303945 0.031 Uiso 1 1 calc R . . . .
C43 C 0.87580(10) 0.67763(8) 0.33386(7) 0.0379(5) Uani 1 1 d . . . . .
H43A H 0.879180 0.649366 0.356980 0.057 Uiso 1 1 calc GR . . . .
H43B H 0.852881 0.710917 0.344751 0.057 Uiso 1 1 calc GR . . . .
H43C H 0.918895 0.688735 0.324410 0.057 Uiso 1 1 calc GR . . . .
C44 C 0.83712(10) 0.69367(8) 0.25515(8) 0.0396(5) Uani 1 1 d . . . . .
H44A H 0.881097 0.700212 0.245082 0.059 Uiso 1 1 calc GR . . . .
H44B H 0.817978 0.729654 0.264164 0.059 Uiso 1 1 calc GR . . . .
H44C H 0.811657 0.677292 0.231577 0.059 Uiso 1 1 calc GR . . . .
C45 C 0.71794(8) 0.57395(7) 0.24863(5) 0.0194(3) Uani 1 1 d . . . . .
H45 H 0.731071 0.594080 0.223517 0.023 Uiso 1 1 calc R . . . .
C46 C 0.65620(8) 0.56434(7) 0.26138(5) 0.0207(3) Uani 1 1 d . . . . .
H46 H 0.618597 0.576415 0.246676 0.025 Uiso 1 1 calc R . . . .
C47 C 0.56574(8) 0.52704(7) 0.35258(6) 0.0233(3) Uani 1 1 d . . . . .
C48 C 0.51267(9) 0.49513(8) 0.36841(6) 0.0281(4) Uani 1 1 d . . . . .
H48 H 0.487000 0.510280 0.391033 0.034 Uiso 1 1 calc R . . . .
C49 C 0.49749(9) 0.44166(8) 0.35125(6) 0.0290(4) Uani 1 1 d . . . . .
H49 H 0.462020 0.421113 0.362434 0.035 Uiso 1 1 calc R . . . .
C50 C 0.53470(8) 0.41853(7) 0.31757(6) 0.0256(4) Uani 1 1 d . . . . .
H50 H 0.523804 0.382537 0.306090 0.031 Uiso 1 1 calc R . . . .
C51 C 0.58848(8) 0.44829(7) 0.30042(5) 0.0211(3) Uani 1 1 d . . . . .
C52 C 0.60308(7) 0.50222(7) 0.31898(5) 0.0187(3) Uani 1 1 d . . . . .
C53 C 0.57860(9) 0.58725(8) 0.37005(6) 0.0289(4) Uani 1 1 d . . . . .
H53 H 0.621954 0.599461 0.359731 0.035 Uiso 1 1 calc R . . . .
C54 C 0.52780(11) 0.62896(9) 0.35114(8) 0.0417(5) Uani 1 1 d . . . . .
H54A H 0.529017 0.627474 0.319399 0.063 Uiso 1 1 calc GR . . . .
H54B H 0.537497 0.667485 0.360846 0.063 Uiso 1 1 calc GR . . . .
H54C H 0.484958 0.618126 0.361282 0.063 Uiso 1 1 calc GR . . . .
C55 C 0.57823(12) 0.58979(10) 0.42050(7) 0.0448(5) Uani 1 1 d . . . . .
H55A H 0.535540 0.579533 0.431261 0.067 Uiso 1 1 calc GR . . . .
H55B H 0.588854 0.628218 0.429998 0.067 Uiso 1 1 calc GR . . . .
H55C H 0.610069 0.563226 0.431991 0.067 Uiso 1 1 calc GR . . . .
C56 C 0.62839(8) 0.42174(7) 0.26336(6) 0.0236(3) Uani 1 1 d . . . . .
H56 H 0.661204 0.450191 0.254157 0.028 Uiso 1 1 calc R . . . .
C57 C 0.58586(9) 0.40783(8) 0.22311(6) 0.0282(4) Uani 1 1 d . . . . .
H57A H 0.554389 0.378752 0.230880 0.042 Uiso 1 1 calc GR . . . .
H57B H 0.613080 0.393911 0.199504 0.042 Uiso 1 1 calc GR . . . .
H57C H 0.563406 0.442101 0.213673 0.042 Uiso 1 1 calc GR . . . .
C58 C 0.66494(9) 0.36829(7) 0.27998(6) 0.0289(4) Uani 1 1 d . . . . .
H58A H 0.692328 0.378751 0.304527 0.043 Uiso 1 1 calc GR . . . .
H58B H 0.691550 0.352959 0.256568 0.043 Uiso 1 1 calc GR . . . .
H58C H 0.633873 0.339632 0.289263 0.043 Uiso 1 1 calc GR . . . .
C59 C 0.75213(9) 0.27757(7) 0.59344(6) 0.0257(4) Uani 1 1 d . . . . .
H59 H 0.772956 0.296473 0.570224 0.031 Uiso 1 1 calc R . . . .
C60 C 0.68595(9) 0.26500(8) 0.58946(6) 0.0308(4) Uani 1 1 d . . . . .
H60 H 0.663278 0.275921 0.564111 0.037 Uiso 1 1 calc R . . . .
C61 C 0.65358(9) 0.23625(8) 0.62313(6) 0.0320(4) Uani 1 1 d . . . . .
H61 H 0.609114 0.228055 0.620767 0.038 Uiso 1 1 calc R . . . .
C62 C 0.68813(9) 0.22000(8) 0.66008(6) 0.0303(4) Uani 1 1 d . . . . .
H62 H 0.667083 0.200231 0.682788 0.036 Uiso 1 1 calc R . . . .
C63 C 0.75463(9) 0.23300(7) 0.66372(6) 0.0249(4) Uani 1 1 d . . . . .
H63 H 0.776996 0.221214 0.688962 0.030 Uiso 1 1 calc R . . . .
C64 C 0.78904(8) 0.26296(7) 0.63104(5) 0.0206(3) Uani 1 1 d . . . . .
C65 C 0.87353(8) 0.28883(7) 0.72085(5) 0.0223(3) Uani 1 1 d . . . . .
H65 H 0.833241 0.307464 0.719250 0.027 Uiso 1 1 calc R . . . .
C66 C 0.90441(9) 0.28514(7) 0.76153(6) 0.0253(4) Uani 1 1 d . . . . .
H66 H 0.884770 0.300926 0.786526 0.030 Uiso 1 1 calc R . . . .
C67 C 0.96470(9) 0.25785(7) 0.76498(6) 0.0254(4) Uani 1 1 d . . . . .
H67 H 0.986294 0.255891 0.792036 0.030 Uiso 1 1 calc R . . . .
C68 C 0.99217(8) 0.23360(7) 0.72744(6) 0.0239(4) Uani 1 1 d . . . . .
H68 H 1.032233 0.214646 0.729371 0.029 Uiso 1 1 calc R . . . .
C69 C 0.96028(8) 0.23735(7) 0.68682(5) 0.0216(3) Uani 1 1 d . . . . .
H69 H 0.979548 0.220426 0.662137 0.026 Uiso 1 1 calc R . . . .
C70 C 0.90028(8) 0.26570(6) 0.68189(5) 0.0196(3) Uani 1 1 d . . . . .
C71 C 0.89857(9) 0.18649(8) 0.59105(6) 0.0265(4) Uani 1 1 d . . . . .
H71 H 0.871536 0.167751 0.611234 0.032 Uiso 1 1 calc R . . . .
C72 C 0.93069(9) 0.15364(8) 0.55939(6) 0.0307(4) Uani 1 1 d . . . . .
H72 H 0.924512 0.113879 0.558465 0.037 Uiso 1 1 calc R . . . .
C73 C 0.97201(9) 0.18007(9) 0.52914(6) 0.0319(4) Uani 1 1 d . . . . .
H73 H 0.994158 0.158289 0.508059 0.038 Uiso 1 1 calc R . . . .
C74 C 0.97973(9) 0.23897(9) 0.53080(6) 0.0335(4) Uani 1 1 d . . . . .
H74 H 1.007472 0.257174 0.510772 0.040 Uiso 1 1 calc R . . . .
C75 C 0.94618(9) 0.27176(8) 0.56239(6) 0.0274(4) Uani 1 1 d . . . . .
H75 H 0.951481 0.311633 0.562342 0.033 Uiso 1 1 calc R . . . .
C76 C 0.90497(8) 0.24680(7) 0.59403(5) 0.0214(3) Uani 1 1 d . . . . .
C77 C 0.93764(9) 0.37729(8) 0.63179(6) 0.0288(4) Uani 1 1 d . . . . .
H77 H 0.974166 0.353315 0.631088 0.035 Uiso 1 1 calc R . . . .
C78 C 0.94719(10) 0.43666(8) 0.63292(6) 0.0340(4) Uani 1 1 d . . . . .
H78 H 0.989498 0.451542 0.632385 0.041 Uiso 1 1 calc R . . . .
C79 C 0.89430(10) 0.47368(8) 0.63481(6) 0.0308(4) Uani 1 1 d . . . . .
H79 H 0.900541 0.513441 0.635340 0.037 Uiso 1 1 calc R . . . .
C80 C 0.83194(10) 0.45064(7) 0.63592(5) 0.0267(4) Uani 1 1 d . . . . .
H80 H 0.795828 0.474992 0.637765 0.032 Uiso 1 1 calc R . . . .
C81 C 0.82285(9) 0.39089(7) 0.63428(5) 0.0221(3) Uani 1 1 d . . . . .
H81 H 0.780339 0.376474 0.634953 0.026 Uiso 1 1 calc R . . . .
C82 C 0.87492(8) 0.35190(7) 0.63168(5) 0.0204(3) Uani 1 1 d . . . . .
B1 B 0.86656(9) 0.28098(8) 0.63383(6) 0.0200(4) Uani 1 1 d . . . . .

loop_
_atom_site_aniso_label
_atom_site_aniso_U_11
_atom_site_aniso_U_22
_atom_site_aniso_U_33
_atom_site_aniso_U_23
_atom_site_aniso_U_13
_atom_site_aniso_U_12
P1 0.0179(2) 0.01950(19) 0.01714(19) 0.00059(15) -0.00118(15) -0.00117(16)
O1 0.0473(9) 0.0226(6) 0.0420(8) -0.0036(6) 0.0053(6) 0.0055(6)
N1 0.0177(7) 0.0250(7) 0.0194(7) 0.0032(5) -0.0016(5) -0.0006(5)
N2 0.0172(6) 0.0185(6) 0.0149(6) -0.0006(5) 0.0003(5) 0.0013(5)
N3 0.0164(6) 0.0205(6) 0.0154(6) -0.0018(5) 0.0001(5) -0.0011(5)
N4 0.0181(7) 0.0190(6) 0.0188(6) 0.0016(5) -0.0020(5) -0.0012(5)
N5 0.0149(6) 0.0189(6) 0.0174(6) 0.0017(5) 0.0001(5) 0.0015(5)
N6 0.0146(6) 0.0183(6) 0.0189(6) 0.0015(5) -0.0010(5) -0.0004(5)
C1 0.0196(8) 0.0373(10) 0.0222(8) 0.0048(7) -0.0010(7) -0.0003(7)
C2 0.0304(9) 0.0221(8) 0.0263(9) 0.0045(7) -0.0004(7) -0.0025(7)
C3 0.0265(9) 0.0203(8) 0.0338(9) 0.0004(7) -0.0041(7) 0.0011(7)
C4 0.0484(13) 0.0339(11) 0.0469(12) -0.0130(9) 0.0057(10) 0.0057(9)
C5 0.0138(7) 0.0202(7) 0.0173(7) 0.0003(6) 0.0019(6) -0.0027(6)
C6 0.0225(8) 0.0239(8) 0.0204(8) -0.0012(6) -0.0030(6) 0.0019(7)
C7 0.0299(10) 0.0256(9) 0.0329(10) -0.0078(7) -0.0010(8) 0.0001(7)
C8 0.0343(10) 0.0282(9) 0.0340(10) -0.0096(8) 0.0013(8) 0.0070(8)
C9 0.0281(9) 0.0283(9) 0.0292(9) -0.0030(7) 0.0076(7) 0.0066(7)
C10 0.0208(8) 0.0250(8) 0.0234(8) 0.0017(7) 0.0029(6) 0.0035(7)
C11 0.0221(8) 0.0194(8) 0.0161(7) -0.0016(6) 0.0000(6) 0.0035(6)
C12 0.0220(8) 0.0251(8) 0.0253(8) -0.0046(7) 0.0002(7) -0.0040(7)
C13 0.0370(11) 0.0344(10) 0.0403(11) 0.0019(9) 0.0040(9) -0.0086(9)
C14 0.0233(9) 0.0447(11) 0.0309(10) -0.0095(8) -0.0027(7) -0.0019(8)
C15 0.0229(9) 0.0256(9) 0.0379(10) -0.0022(7) 0.0098(8) 0.0019(7)
C16 0.0324(11) 0.0395(11) 0.0399(11) -0.0036(9) -0.0003(9) -0.0070(9)
C17 0.0260(10) 0.0489(12) 0.0458(12) 0.0120(10) 0.0087(9) -0.0004(9)
C18 0.0191(8) 0.0216(8) 0.0153(7) 0.0020(6) -0.0005(6) 0.0018(6)
C19 0.0182(8) 0.0211(8) 0.0187(7) 0.0017(6) 0.0005(6) 0.0025(6)
C20 0.0218(8) 0.0228(8) 0.0256(8) -0.0003(7) -0.0028(7) -0.0015(6)
C21 0.0253(9) 0.0270(9) 0.0388(10) -0.0056(8) -0.0086(8) -0.0059(7)
C22 0.0374(11) 0.0301(10) 0.0349(10) -0.0147(8) -0.0083(8) -0.0038(8)
C23 0.0295(10) 0.0283(9) 0.0267(9) -0.0098(7) -0.0012(7) 0.0011(7)
C24 0.0226(8) 0.0210(8) 0.0205(8) -0.0030(6) -0.0006(6) -0.0014(6)
C25 0.0230(8) 0.0194(7) 0.0176(7) -0.0028(6) -0.0017(6) -0.0017(6)
C26 0.0188(8) 0.0300(9) 0.0297(9) 0.0000(7) -0.0005(7) -0.0034(7)
C27 0.0359(12) 0.0515(13) 0.0487(13) 0.0204(10) 0.0095(10) 0.0044(10)
C28 0.0280(10) 0.0435(11) 0.0366(10) 0.0062(9) -0.0017(8) 0.0052(8)
C29 0.0212(8) 0.0286(9) 0.0203(8) -0.0084(7) 0.0024(6) -0.0002(7)
C30 0.0260(10) 0.0399(11) 0.0330(10) -0.0033(8) 0.0015(8) 0.0051(8)
C31 0.0272(9) 0.0365(10) 0.0274(9) -0.0089(8) 0.0070(7) -0.0033(8)
C32 0.0169(7) 0.0154(7) 0.0174(7) -0.0021(6) -0.0004(6) 0.0002(6)
C33 0.0212(8) 0.0241(8) 0.0168(7) 0.0007(6) 0.0015(6) 0.0027(6)
C34 0.0220(9) 0.0301(9) 0.0305(9) -0.0025(7) 0.0062(7) 0.0070(7)
C35 0.0169(8) 0.0357(10) 0.0419(11) 0.0008(8) 0.0086(8) 0.0015(7)
C36 0.0185(8) 0.0267(9) 0.0353(10) 0.0034(7) 0.0045(7) -0.0033(7)
C37 0.0188(8) 0.0215(8) 0.0219(8) 0.0039(6) 0.0017(6) 0.0007(6)
C38 0.0157(8) 0.0234(8) 0.0160(7) 0.0042(6) 0.0016(6) 0.0027(6)
C39 0.0240(8) 0.0224(8) 0.0226(8) -0.0044(6) -0.0007(7) 0.0043(7)
C40 0.0379(11) 0.0250(9) 0.0482(12) -0.0026(8) -0.0113(9) 0.0036(8)
C41 0.0554(14) 0.0375(11) 0.0311(10) -0.0022(9) -0.0157(10) 0.0000(10)
C42 0.0178(8) 0.0185(8) 0.0422(10) 0.0012(7) 0.0027(7) -0.0002(6)
C43 0.0293(10) 0.0263(9) 0.0582(13) -0.0123(9) 0.0024(9) -0.0004(8)
C44 0.0306(10) 0.0240(9) 0.0643(14) 0.0163(9) 0.0015(10) -0.0006(8)
C45 0.0208(8) 0.0185(7) 0.0189(7) 0.0039(6) -0.0022(6) 0.0018(6)
C46 0.0208(8) 0.0204(8) 0.0210(8) 0.0032(6) -0.0043(6) 0.0017(6)
C47 0.0185(8) 0.0265(8) 0.0249(8) 0.0018(7) -0.0006(7) 0.0006(7)
C48 0.0198(8) 0.0348(10) 0.0297(9) 0.0044(8) 0.0048(7) 0.0003(7)
C49 0.0180(8) 0.0316(9) 0.0373(10) 0.0106(8) -0.0003(7) -0.0057(7)
C50 0.0222(9) 0.0219(8) 0.0327(9) 0.0050(7) -0.0060(7) -0.0042(7)
C51 0.0182(8) 0.0209(8) 0.0242(8) 0.0047(6) -0.0059(6) 0.0008(6)
C52 0.0133(7) 0.0222(8) 0.0206(8) 0.0035(6) -0.0033(6) -0.0012(6)
C53 0.0246(9) 0.0302(9) 0.0319(9) -0.0047(8) 0.0080(7) -0.0024(7)
C54 0.0449(13) 0.0282(10) 0.0520(13) -0.0017(9) 0.0073(10) 0.0019(9)
C55 0.0453(13) 0.0544(13) 0.0347(11) -0.0119(10) 0.0046(9) -0.0117(11)
C56 0.0235(9) 0.0180(8) 0.0294(9) 0.0002(7) -0.0022(7) -0.0006(6)
C57 0.0302(10) 0.0261(9) 0.0282(9) 0.0005(7) -0.0049(7) 0.0025(7)
C58 0.0267(9) 0.0248(9) 0.0352(10) -0.0018(7) -0.0069(8) 0.0035(7)
C59 0.0246(9) 0.0283(9) 0.0241(8) 0.0016(7) -0.0008(7) -0.0023(7)
C60 0.0256(9) 0.0373(10) 0.0294(9) -0.0016(8) -0.0074(7) -0.0006(8)
C61 0.0207(9) 0.0358(10) 0.0394(10) -0.0079(8) 0.0006(8) -0.0074(7)
C62 0.0309(10) 0.0289(9) 0.0310(9) -0.0004(7) 0.0040(8) -0.0106(8)
C63 0.0263(9) 0.0224(8) 0.0259(8) 0.0024(7) -0.0014(7) -0.0036(7)
C64 0.0220(8) 0.0162(7) 0.0235(8) -0.0010(6) -0.0005(6) 0.0002(6)
C65 0.0229(8) 0.0183(8) 0.0257(8) 0.0037(6) 0.0005(7) 0.0015(6)
C66 0.0314(10) 0.0230(8) 0.0214(8) 0.0038(7) 0.0018(7) -0.0014(7)
C67 0.0314(10) 0.0209(8) 0.0239(8) 0.0064(7) -0.0056(7) -0.0049(7)
C68 0.0221(8) 0.0178(8) 0.0318(9) 0.0058(7) -0.0053(7) -0.0006(6)
C69 0.0224(8) 0.0179(7) 0.0245(8) 0.0015(6) 0.0005(7) -0.0002(6)
C70 0.0205(8) 0.0150(7) 0.0232(8) 0.0041(6) -0.0011(6) -0.0039(6)
C71 0.0268(9) 0.0293(9) 0.0234(8) -0.0006(7) -0.0002(7) -0.0036(7)
C72 0.0312(10) 0.0314(9) 0.0295(9) -0.0080(8) -0.0035(8) 0.0002(8)
C73 0.0253(9) 0.0465(11) 0.0240(9) -0.0061(8) -0.0012(7) 0.0079(8)
C74 0.0269(10) 0.0460(11) 0.0276(9) 0.0078(8) 0.0051(8) 0.0034(8)
C75 0.0249(9) 0.0296(9) 0.0278(9) 0.0073(7) 0.0004(7) 0.0023(7)
C76 0.0185(8) 0.0260(8) 0.0198(8) 0.0027(6) -0.0037(6) 0.0011(6)
C77 0.0255(9) 0.0274(9) 0.0336(10) 0.0079(7) -0.0080(8) -0.0029(7)
C78 0.0350(11) 0.0319(10) 0.0350(10) 0.0066(8) -0.0097(8) -0.0136(8)
C79 0.0503(12) 0.0211(8) 0.0209(8) -0.0007(7) -0.0038(8) -0.0066(8)
C80 0.0409(11) 0.0243(8) 0.0149(7) -0.0003(6) 0.0034(7) 0.0044(8)
C81 0.0284(9) 0.0236(8) 0.0142(7) 0.0008(6) 0.0007(6) 0.0003(7)
C82 0.0230(8) 0.0227(8) 0.0155(7) 0.0036(6) -0.0043(6) -0.0023(6)
B1 0.0194(9) 0.0189(8) 0.0217(9) 0.0028(7) -0.0011(7) -0.0010(7)

_geom_special_details            
;
 All esds (except the esd in the dihedral angle between two l.s. planes)
 are estimated using the full covariance matrix.  The cell esds are taken
 into account individually in the estimation of esds in distances, angles
 and torsion angles; correlations between esds in cell parameters are only
 used when they are defined by crystal symmetry.  An approximate (isotropic)
 treatment of cell esds is used for estimating esds involving l.s. planes.
;
loop_
_geom_bond_atom_site_label_1
_geom_bond_atom_site_label_2
_geom_bond_distance
_geom_bond_site_symmetry_2
_geom_bond_publ_flag
P1 N1 1.5857(14) . ?
P1 N4 1.5992(13) . ?
P1 C1 1.7957(18) . ?
P1 C2 1.7831(18) . ?
O1 C3 1.350(2) . ?
O1 C4 1.433(2) . ?
N1 C5 1.319(2) . ?
N2 C5 1.3631(19) . ?
N2 C11 1.4431(19) . ?
N2 C18 1.391(2) . ?
N3 C5 1.369(2) . ?
N3 C19 1.395(2) . ?
N3 C25 1.4427(19) . ?
N4 C32 1.317(2) . ?
N5 C32 1.3736(19) . ?
N5 C38 1.446(2) . ?
N5 C45 1.3910(19) . ?
N6 C32 1.370(2) . ?
N6 C46 1.393(2) . ?
N6 C52 1.444(2) . ?
C1 H1A 0.9600 . ?
C1 H1B 0.9600 . ?
C1 H1C 0.9600 . ?
C2 H2 0.9300 . ?
C2 C3 1.318(2) . ?
C3 H3 0.9300 . ?
C4 H4A 0.9600 . ?
C4 H4B 0.9600 . ?
C4 H4C 0.9600 . ?
C6 C7 1.396(2) . ?
C6 C11 1.400(2) . ?
C6 C12 1.518(2) . ?
C7 H7 0.9300 . ?
C7 C8 1.380(3) . ?
C8 H8 0.9300 . ?
C8 C9 1.384(3) . ?
C9 H9 0.9300 . ?
C9 C10 1.400(2) . ?
C10 C11 1.401(2) . ?
C10 C15 1.516(2) . ?
C12 H12 0.9800 . ?
C12 C13 1.536(3) . ?
C12 C14 1.526(2) . ?
C13 H13A 0.9600 . ?
C13 H13B 0.9600 . ?
C13 H13C 0.9600 . ?
C14 H14A 0.9600 . ?
C14 H14B 0.9600 . ?
C14 H14C 0.9600 . ?
C15 H15 0.9800 . ?
C15 C16 1.521(3) . ?
C15 C17 1.531(3) . ?
C16 H16A 0.9600 . ?
C16 H16B 0.9600 . ?
C16 H16C 0.9600 . ?
C17 H17A 0.9600 . ?
C17 H17B 0.9600 . ?
C17 H17C 0.9600 . ?
C18 H18 0.9300 . ?
C18 C19 1.338(2) . ?
C19 H19 0.9300 . ?
C20 C21 1.392(2) . ?
C20 C25 1.402(2) . ?
C20 C26 1.518(2) . ?
C21 H21 0.9300 . ?
C21 C22 1.381(3) . ?
C22 H22 0.9300 . ?
C22 C23 1.380(3) . ?
C23 H23 0.9300 . ?
C23 C24 1.392(2) . ?
C24 C25 1.402(2) . ?
C24 C29 1.518(2) . ?
C26 H26 0.9800 . ?
C26 C27 1.530(3) . ?
C26 C28 1.518(3) . ?
C27 H27A 0.9600 . ?
C27 H27B 0.9600 . ?
C27 H27C 0.9600 . ?
C28 H28A 0.9600 . ?
C28 H28B 0.9600 . ?
C28 H28C 0.9600 . ?
C29 H29 0.9800 . ?
C29 C30 1.535(3) . ?
C29 C31 1.528(2) . ?
C30 H30A 0.9600 . ?
C30 H30B 0.9600 . ?
C30 H30C 0.9600 . ?
C31 H31A 0.9600 . ?
C31 H31B 0.9600 . ?
C31 H31C 0.9600 . ?
C33 C34 1.394(2) . ?
C33 C38 1.404(2) . ?
C33 C39 1.519(2) . ?
C34 H34 0.9300 . ?
C34 C35 1.379(3) . ?
C35 H35 0.9300 . ?
C35 C36 1.376(3) . ?
C36 H36 0.9300 . ?
C36 C37 1.399(2) . ?
C37 C38 1.402(2) . ?
C37 C42 1.512(2) . ?
C39 H39 0.9800 . ?
C39 C40 1.526(2) . ?
C39 C41 1.522(2) . ?
C40 H40A 0.9600 . ?
C40 H40B 0.9600 . ?
C40 H40C 0.9600 . ?
C41 H41A 0.9600 . ?
C41 H41B 0.9600 . ?
C41 H41C 0.9600 . ?
C42 H42 0.9800 . ?
C42 C43 1.536(3) . ?
C42 C44 1.535(3) . ?
C43 H43A 0.9600 . ?
C43 H43B 0.9600 . ?
C43 H43C 0.9600 . ?
C44 H44A 0.9600 . ?
C44 H44B 0.9600 . ?
C44 H44C 0.9600 . ?
C45 H45 0.9300 . ?
C45 C46 1.337(2) . ?
C46 H46 0.9300 . ?
C47 C48 1.396(2) . ?
C47 C52 1.393(2) . ?
C47 C53 1.514(2) . ?
C48 H48 0.9300 . ?
C48 C49 1.378(3) . ?
C49 H49 0.9300 . ?
C49 C50 1.378(3) . ?
C50 H50 0.9300 . ?
C50 C51 1.396(2) . ?
C51 C52 1.401(2) . ?
C51 C56 1.516(2) . ?
C53 H53 0.9800 . ?
C53 C54 1.528(3) . ?
C53 C55 1.526(3) . ?
C54 H54A 0.9600 . ?
C54 H54B 0.9600 . ?
C54 H54C 0.9600 . ?
C55 H55A 0.9600 . ?
C55 H55B 0.9600 . ?
C55 H55C 0.9600 . ?
C56 H56 0.9800 . ?
C56 C57 1.529(2) . ?
C56 C58 1.530(2) . ?
C57 H57A 0.9600 . ?
C57 H57B 0.9600 . ?
C57 H57C 0.9600 . ?
C58 H58A 0.9600 . ?
C58 H58B 0.9600 . ?
C58 H58C 0.9600 . ?
C59 H59 0.9300 . ?
C59 C60 1.387(3) . ?
C59 C64 1.405(2) . ?
C60 H60 0.9300 . ?
C60 C61 1.384(3) . ?
C61 H61 0.9300 . ?
C61 C62 1.373(3) . ?
C62 H62 0.9300 . ?
C62 C63 1.395(3) . ?
C63 H63 0.9300 . ?
C63 C64 1.397(2) . ?
C64 B1 1.639(2) . ?
C65 H65 0.9300 . ?
C65 C66 1.384(2) . ?
C65 C70 1.404(2) . ?
C66 H66 0.9300 . ?
C66 C67 1.387(3) . ?
C67 H67 0.9300 . ?
C67 C68 1.385(2) . ?
C68 H68 0.9300 . ?
C68 C69 1.392(2) . ?
C69 H69 0.9300 . ?
C69 C70 1.398(2) . ?
C70 B1 1.646(2) . ?
C71 H71 0.9300 . ?
C71 C72 1.387(2) . ?
C71 C76 1.406(2) . ?
C72 H72 0.9300 . ?
C72 C73 1.386(3) . ?
C73 H73 0.9300 . ?
C73 C74 1.374(3) . ?
C74 H74 0.9300 . ?
C74 C75 1.399(3) . ?
C75 H75 0.9300 . ?
C75 C76 1.399(2) . ?
C76 B1 1.640(2) . ?
C77 H77 0.9300 . ?
C77 C78 1.389(3) . ?
C77 C82 1.409(2) . ?
C78 H78 0.9300 . ?
C78 C79 1.380(3) . ?
C79 H79 0.9300 . ?
C79 C80 1.381(3) . ?
C80 H80 0.9300 . ?
C80 C81 1.397(2) . ?
C81 H81 0.9300 . ?
C81 C82 1.397(2) . ?
C82 B1 1.653(2) . ?

loop_
_geom_angle_atom_site_label_1
_geom_angle_atom_site_label_2
_geom_angle_atom_site_label_3
_geom_angle
_geom_angle_site_symmetry_1
_geom_angle_site_symmetry_3
_geom_angle_publ_flag
N1 P1 N4 113.54(7) . . ?
N1 P1 C1 108.15(8) . . ?
N1 P1 C2 108.29(8) . . ?
N4 P1 C1 111.52(8) . . ?
N4 P1 C2 106.94(8) . . ?
C2 P1 C1 108.22(9) . . ?
C3 O1 C4 116.31(15) . . ?
C5 N1 P1 131.35(12) . . ?
C5 N2 C11 125.75(13) . . ?
C5 N2 C18 110.29(13) . . ?
C18 N2 C11 123.73(13) . . ?
C5 N3 C19 109.79(12) . . ?
C5 N3 C25 126.22(13) . . ?
C19 N3 C25 123.22(13) . . ?
C32 N4 P1 128.04(11) . . ?
C32 N5 C38 126.79(13) . . ?
C32 N5 C45 109.78(13) . . ?
C45 N5 C38 123.04(13) . . ?
C32 N6 C46 109.77(13) . . ?
C32 N6 C52 124.12(13) . . ?
C46 N6 C52 123.98(13) . . ?
P1 C1 H1A 109.5 . . ?
P1 C1 H1B 109.5 . . ?
P1 C1 H1C 109.5 . . ?
H1A C1 H1B 109.5 . . ?
H1A C1 H1C 109.5 . . ?
H1B C1 H1C 109.5 . . ?
P1 C2 H2 118.1 . . ?
C3 C2 P1 123.87(14) . . ?
C3 C2 H2 118.1 . . ?
O1 C3 H3 119.4 . . ?
C2 C3 O1 121.14(17) . . ?
C2 C3 H3 119.4 . . ?
O1 C4 H4A 109.5 . . ?
O1 C4 H4B 109.5 . . ?
O1 C4 H4C 109.5 . . ?
H4A C4 H4B 109.5 . . ?
H4A C4 H4C 109.5 . . ?
H4B C4 H4C 109.5 . . ?
N1 C5 N2 124.86(14) . . ?
N1 C5 N3 129.72(14) . . ?
N2 C5 N3 105.17(13) . . ?
C7 C6 C11 117.30(16) . . ?
C7 C6 C12 119.96(15) . . ?
C11 C6 C12 122.70(14) . . ?
C6 C7 H7 119.4 . . ?
C8 C7 C6 121.15(17) . . ?
C8 C7 H7 119.4 . . ?
C7 C8 H8 119.9 . . ?
C7 C8 C9 120.20(16) . . ?
C9 C8 H8 119.9 . . ?
C8 C9 H9 119.3 . . ?
C8 C9 C10 121.37(17) . . ?
C10 C9 H9 119.3 . . ?
C9 C10 C11 116.78(16) . . ?
C9 C10 C15 120.59(15) . . ?
C11 C10 C15 122.62(15) . . ?
C6 C11 N2 118.65(14) . . ?
C6 C11 C10 123.18(15) . . ?
C10 C11 N2 118.07(14) . . ?
C6 C12 H12 107.9 . . ?
C6 C12 C13 112.27(15) . . ?
C6 C12 C14 110.52(14) . . ?
C13 C12 H12 107.9 . . ?
C14 C12 H12 107.9 . . ?
C14 C12 C13 110.32(15) . . ?
C12 C13 H13A 109.5 . . ?
C12 C13 H13B 109.5 . . ?
C12 C13 H13C 109.5 . . ?
H13A C13 H13B 109.5 . . ?
H13A C13 H13C 109.5 . . ?
H13B C13 H13C 109.5 . . ?
C12 C14 H14A 109.5 . . ?
C12 C14 H14B 109.5 . . ?
C12 C14 H14C 109.5 . . ?
H14A C14 H14B 109.5 . . ?
H14A C14 H14C 109.5 . . ?
H14B C14 H14C 109.5 . . ?
C10 C15 H15 107.7 . . ?
C10 C15 C16 110.24(15) . . ?
C10 C15 C17 112.85(16) . . ?
C16 C15 H15 107.7 . . ?
C16 C15 C17 110.42(16) . . ?
C17 C15 H15 107.7 . . ?
C15 C16 H16A 109.5 . . ?
C15 C16 H16B 109.5 . . ?
C15 C16 H16C 109.5 . . ?
H16A C16 H16B 109.5 . . ?
H16A C16 H16C 109.5 . . ?
H16B C16 H16C 109.5 . . ?
C15 C17 H17A 109.5 . . ?
C15 C17 H17B 109.5 . . ?
C15 C17 H17C 109.5 . . ?
H17A C17 H17B 109.5 . . ?
H17A C17 H17C 109.5 . . ?
H17B C17 H17C 109.5 . . ?
N2 C18 H18 126.4 . . ?
C19 C18 N2 107.25(14) . . ?
C19 C18 H18 126.4 . . ?
N3 C19 H19 126.2 . . ?
C18 C19 N3 107.50(14) . . ?
C18 C19 H19 126.2 . . ?
C21 C20 C25 116.87(16) . . ?
C21 C20 C26 119.08(16) . . ?
C25 C20 C26 123.96(15) . . ?
C20 C21 H21 119.2 . . ?
C22 C21 C20 121.55(17) . . ?
C22 C21 H21 119.2 . . ?
C21 C22 H22 120.0 . . ?
C23 C22 C21 120.09(16) . . ?
C23 C22 H22 120.0 . . ?
C22 C23 H23 119.3 . . ?
C22 C23 C24 121.32(17) . . ?
C24 C23 H23 119.3 . . ?
C23 C24 C25 117.13(16) . . ?
C23 C24 C29 119.40(15) . . ?
C25 C24 C29 123.33(14) . . ?
C20 C25 N3 118.01(14) . . ?
C24 C25 N3 118.84(14) . . ?
C24 C25 C20 123.02(15) . . ?
C20 C26 H26 107.8 . . ?
C20 C26 C27 110.11(15) . . ?
C27 C26 H26 107.8 . . ?
C28 C26 C20 112.06(15) . . ?
C28 C26 H26 107.8 . . ?
C28 C26 C27 111.17(16) . . ?
C26 C27 H27A 109.5 . . ?
C26 C27 H27B 109.5 . . ?
C26 C27 H27C 109.5 . . ?
H27A C27 H27B 109.5 . . ?
H27A C27 H27C 109.5 . . ?
H27B C27 H27C 109.5 . . ?
C26 C28 H28A 109.5 . . ?
C26 C28 H28B 109.5 . . ?
C26 C28 H28C 109.5 . . ?
H28A C28 H28B 109.5 . . ?
H28A C28 H28C 109.5 . . ?
H28B C28 H28C 109.5 . . ?
C24 C29 H29 108.2 . . ?
C24 C29 C30 109.39(14) . . ?
C24 C29 C31 113.57(14) . . ?
C30 C29 H29 108.2 . . ?
C31 C29 H29 108.2 . . ?
C31 C29 C30 109.19(15) . . ?
C29 C30 H30A 109.5 . . ?
C29 C30 H30B 109.5 . . ?
C29 C30 H30C 109.5 . . ?
H30A C30 H30B 109.5 . . ?
H30A C30 H30C 109.5 . . ?
H30B C30 H30C 109.5 . . ?
C29 C31 H31A 109.5 . . ?
C29 C31 H31B 109.5 . . ?
C29 C31 H31C 109.5 . . ?
H31A C31 H31B 109.5 . . ?
H31A C31 H31C 109.5 . . ?
H31B C31 H31C 109.5 . . ?
N4 C32 N5 129.51(14) . . ?
N4 C32 N6 125.18(14) . . ?
N6 C32 N5 105.20(13) . . ?
C34 C33 C38 116.85(15) . . ?
C34 C33 C39 120.38(15) . . ?
C38 C33 C39 122.67(14) . . ?
C33 C34 H34 119.3 . . ?
C35 C34 C33 121.37(16) . . ?
C35 C34 H34 119.3 . . ?
C34 C35 H35 119.7 . . ?
C36 C35 C34 120.68(16) . . ?
C36 C35 H35 119.7 . . ?
C35 C36 H36 119.6 . . ?
C35 C36 C37 120.80(16) . . ?
C37 C36 H36 119.6 . . ?
C36 C37 C38 117.33(15) . . ?
C36 C37 C42 119.20(15) . . ?
C38 C37 C42 123.47(14) . . ?
C33 C38 N5 118.61(14) . . ?
C37 C38 N5 118.40(14) . . ?
C37 C38 C33 122.91(15) . . ?
C33 C39 H39 107.8 . . ?
C33 C39 C40 113.72(14) . . ?
C33 C39 C41 109.88(15) . . ?
C40 C39 H39 107.8 . . ?
C41 C39 H39 107.8 . . ?
C41 C39 C40 109.67(15) . . ?
C39 C40 H40A 109.5 . . ?
C39 C40 H40B 109.5 . . ?
C39 C40 H40C 109.5 . . ?
H40A C40 H40B 109.5 . . ?
H40A C40 H40C 109.5 . . ?
H40B C40 H40C 109.5 . . ?
C39 C41 H41A 109.5 . . ?
C39 C41 H41B 109.5 . . ?
C39 C41 H41C 109.5 . . ?
H41A C41 H41B 109.5 . . ?
H41A C41 H41C 109.5 . . ?
H41B C41 H41C 109.5 . . ?
C37 C42 H42 108.1 . . ?
C37 C42 C43 111.09(14) . . ?
C37 C42 C44 110.31(15) . . ?
C43 C42 H42 108.1 . . ?
C44 C42 H42 108.1 . . ?
C44 C42 C43 111.14(15) . . ?
C42 C43 H43A 109.5 . . ?
C42 C43 H43B 109.5 . . ?
C42 C43 H43C 109.5 . . ?
H43A C43 H43B 109.5 . . ?
H43A C43 H43C 109.5 . . ?
H43B C43 H43C 109.5 . . ?
C42 C44 H44A 109.5 . . ?
C42 C44 H44B 109.5 . . ?
C42 C44 H44C 109.5 . . ?
H44A C44 H44B 109.5 . . ?
H44A C44 H44C 109.5 . . ?
H44B C44 H44C 109.5 . . ?
N5 C45 H45 126.2 . . ?
C46 C45 N5 107.61(14) . . ?
C46 C45 H45 126.2 . . ?
N6 C46 H46 126.2 . . ?
C45 C46 N6 107.64(14) . . ?
C45 C46 H46 126.2 . . ?
C48 C47 C53 120.18(16) . . ?
C52 C47 C48 117.11(16) . . ?
C52 C47 C53 122.63(15) . . ?
C47 C48 H48 119.3 . . ?
C49 C48 C47 121.43(17) . . ?
C49 C48 H48 119.3 . . ?
C48 C49 H49 119.9 . . ?
C48 C49 C50 120.23(16) . . ?
C50 C49 H49 119.9 . . ?
C49 C50 H50 119.5 . . ?
C49 C50 C51 121.02(16) . . ?
C51 C50 H50 119.5 . . ?
C50 C51 C52 117.31(16) . . ?
C50 C51 C56 119.77(15) . . ?
C52 C51 C56 122.91(15) . . ?
C47 C52 N6 120.21(14) . . ?
C47 C52 C51 122.89(15) . . ?
C51 C52 N6 116.87(14) . . ?
C47 C53 H53 108.1 . . ?
C47 C53 C54 109.53(16) . . ?
C47 C53 C55 112.52(16) . . ?
C54 C53 H53 108.1 . . ?
C55 C53 H53 108.1 . . ?
C55 C53 C54 110.24(17) . . ?
C53 C54 H54A 109.5 . . ?
C53 C54 H54B 109.5 . . ?
C53 C54 H54C 109.5 . . ?
H54A C54 H54B 109.5 . . ?
H54A C54 H54C 109.5 . . ?
H54B C54 H54C 109.5 . . ?
C53 C55 H55A 109.5 . . ?
C53 C55 H55B 109.5 . . ?
C53 C55 H55C 109.5 . . ?
H55A C55 H55B 109.5 . . ?
H55A C55 H55C 109.5 . . ?
H55B C55 H55C 109.5 . . ?
C51 C56 H56 107.7 . . ?
C51 C56 C57 111.61(14) . . ?
C51 C56 C58 110.36(14) . . ?
C57 C56 H56 107.7 . . ?
C57 C56 C58 111.56(14) . . ?
C58 C56 H56 107.7 . . ?
C56 C57 H57A 109.5 . . ?
C56 C57 H57B 109.5 . . ?
C56 C57 H57C 109.5 . . ?
H57A C57 H57B 109.5 . . ?
H57A C57 H57C 109.5 . . ?
H57B C57 H57C 109.5 . . ?
C56 C58 H58A 109.5 . . ?
C56 C58 H58B 109.5 . . ?
C56 C58 H58C 109.5 . . ?
H58A C58 H58B 109.5 . . ?
H58A C58 H58C 109.5 . . ?
H58B C58 H58C 109.5 . . ?
C60 C59 H59 118.6 . . ?
C60 C59 C64 122.82(16) . . ?
C64 C59 H59 118.6 . . ?
C59 C60 H60 119.9 . . ?
C61 C60 C59 120.14(17) . . ?
C61 C60 H60 119.9 . . ?
C60 C61 H61 120.5 . . ?
C62 C61 C60 118.98(17) . . ?
C62 C61 H61 120.5 . . ?
C61 C62 H62 119.8 . . ?
C61 C62 C63 120.31(17) . . ?
C63 C62 H62 119.8 . . ?
C62 C63 H63 118.6 . . ?
C62 C63 C64 122.76(16) . . ?
C64 C63 H63 118.6 . . ?
C59 C64 B1 119.89(14) . . ?
C63 C64 C59 114.95(15) . . ?
C63 C64 B1 125.16(15) . . ?
C66 C65 H65 118.5 . . ?
C66 C65 C70 122.96(16) . . ?
C70 C65 H65 118.5 . . ?
C65 C66 H66 120.0 . . ?
C65 C66 C67 119.92(16) . . ?
C67 C66 H66 120.0 . . ?
C66 C67 H67 120.6 . . ?
C68 C67 C66 118.86(16) . . ?
C68 C67 H67 120.6 . . ?
C67 C68 H68 119.7 . . ?
C67 C68 C69 120.51(16) . . ?
C69 C68 H68 119.7 . . ?
C68 C69 H69 118.9 . . ?
C68 C69 C70 122.22(16) . . ?
C70 C69 H69 118.9 . . ?
C65 C70 B1 119.69(14) . . ?
C69 C70 C65 115.51(15) . . ?
C69 C70 B1 124.17(14) . . ?
C72 C71 H71 118.5 . . ?
C72 C71 C76 123.05(17) . . ?
C76 C71 H71 118.5 . . ?
C71 C72 H72 120.0 . . ?
C73 C72 C71 120.00(18) . . ?
C73 C72 H72 120.0 . . ?
C72 C73 H73 120.5 . . ?
C74 C73 C72 118.95(17) . . ?
C74 C73 H73 120.5 . . ?
C73 C74 H74 119.7 . . ?
C73 C74 C75 120.52(18) . . ?
C75 C74 H74 119.7 . . ?
C74 C75 H75 118.8 . . ?
C76 C75 C74 122.45(17) . . ?
C76 C75 H75 118.8 . . ?
C71 C76 B1 118.85(15) . . ?
C75 C76 C71 115.00(16) . . ?
C75 C76 B1 126.12(15) . . ?
C78 C77 H77 118.6 . . ?
C78 C77 C82 122.74(18) . . ?
C82 C77 H77 118.6 . . ?
C77 C78 H78 119.8 . . ?
C79 C78 C77 120.41(18) . . ?
C79 C78 H78 119.8 . . ?
C78 C79 H79 120.6 . . ?
C78 C79 C80 118.82(16) . . ?
C80 C79 H79 120.6 . . ?
C79 C80 H80 119.8 . . ?
C79 C80 C81 120.30(17) . . ?
C81 C80 H80 119.8 . . ?
C80 C81 H81 118.6 . . ?
C82 C81 C80 122.77(17) . . ?
C82 C81 H81 118.6 . . ?
C77 C82 B1 120.57(15) . . ?
C81 C82 C77 114.92(15) . . ?
C81 C82 B1 124.19(15) . . ?
C64 B1 C70 113.23(13) . . ?
C64 B1 C76 107.51(13) . . ?
C64 B1 C82 110.54(13) . . ?
C70 B1 C82 101.85(12) . . ?
C76 B1 C70 110.09(13) . . ?
C76 B1 C82 113.69(13) . . ?

loop_
_geom_torsion_atom_site_label_1
_geom_torsion_atom_site_label_2
_geom_torsion_atom_site_label_3
_geom_torsion_atom_site_label_4
_geom_torsion
_geom_torsion_site_symmetry_1
_geom_torsion_site_symmetry_2
_geom_torsion_site_symmetry_3
_geom_torsion_site_symmetry_4
_geom_torsion_publ_flag
P1 N1 C5 N2 114.50(17) . . . . ?
P1 N1 C5 N3 -72.2(2) . . . . ?
P1 N4 C32 N5 67.0(2) . . . . ?
P1 N4 C32 N6 -117.38(16) . . . . ?
P1 C2 C3 O1 -175.36(14) . . . . ?
N1 P1 N4 C32 147.48(14) . . . . ?
N1 P1 C2 C3 2.68(19) . . . . ?
N2 C18 C19 N3 0.45(18) . . . . ?
N4 P1 N1 C5 118.26(15) . . . . ?
N4 P1 C2 C3 125.39(16) . . . . ?
N5 C45 C46 N6 0.31(18) . . . . ?
C1 P1 N1 C5 -6.08(18) . . . . ?
C1 P1 N4 C32 -90.03(16) . . . . ?
C1 P1 C2 C3 -114.34(17) . . . . ?
C2 P1 N1 C5 -123.14(16) . . . . ?
C2 P1 N4 C32 28.11(16) . . . . ?
C4 O1 C3 C2 -179.27(18) . . . . ?
C5 N2 C11 C6 -95.79(19) . . . . ?
C5 N2 C11 C10 87.72(19) . . . . ?
C5 N2 C18 C19 -0.16(18) . . . . ?
C5 N3 C19 C18 -0.60(18) . . . . ?
C5 N3 C25 C20 -64.3(2) . . . . ?
C5 N3 C25 C24 119.69(17) . . . . ?
C6 C7 C8 C9 -0.1(3) . . . . ?
C7 C6 C11 N2 -175.26(15) . . . . ?
C7 C6 C11 C10 1.0(2) . . . . ?
C7 C6 C12 C13 -51.4(2) . . . . ?
C7 C6 C12 C14 72.2(2) . . . . ?
C7 C8 C9 C10 1.0(3) . . . . ?
C8 C9 C10 C11 -0.8(3) . . . . ?
C8 C9 C10 C15 -179.61(17) . . . . ?
C9 C10 C11 N2 176.10(14) . . . . ?
C9 C10 C11 C6 -0.2(2) . . . . ?
C9 C10 C15 C16 78.5(2) . . . . ?
C9 C10 C15 C17 -45.5(2) . . . . ?
C11 N2 C5 N1 -0.2(2) . . . . ?
C11 N2 C5 N3 -174.91(14) . . . . ?
C11 N2 C18 C19 174.68(14) . . . . ?
C11 C6 C7 C8 -0.9(3) . . . . ?
C11 C6 C12 C13 130.69(17) . . . . ?
C11 C6 C12 C14 -105.67(18) . . . . ?
C11 C10 C15 C16 -100.24(19) . . . . ?
C11 C10 C15 C17 135.77(17) . . . . ?
C12 C6 C7 C8 -178.89(17) . . . . ?
C12 C6 C11 N2 2.7(2) . . . . ?
C12 C6 C11 C10 179.00(15) . . . . ?
C15 C10 C11 N2 -5.1(2) . . . . ?
C15 C10 C11 C6 178.55(16) . . . . ?
C18 N2 C5 N1 174.50(15) . . . . ?
C18 N2 C5 N3 -0.21(16) . . . . ?
C18 N2 C11 C6 90.18(19) . . . . ?
C18 N2 C11 C10 -86.31(19) . . . . ?
C19 N3 C5 N1 -173.86(16) . . . . ?
C19 N3 C5 N2 0.49(16) . . . . ?
C19 N3 C25 C20 104.56(18) . . . . ?
C19 N3 C25 C24 -71.4(2) . . . . ?
C20 C21 C22 C23 -0.5(3) . . . . ?
C21 C20 C25 N3 -176.93(15) . . . . ?
C21 C20 C25 C24 -1.1(2) . . . . ?
C21 C20 C26 C27 69.2(2) . . . . ?
C21 C20 C26 C28 -55.1(2) . . . . ?
C21 C22 C23 C24 -0.4(3) . . . . ?
C22 C23 C24 C25 0.4(3) . . . . ?
C22 C23 C24 C29 176.35(17) . . . . ?
C23 C24 C25 N3 176.13(15) . . . . ?
C23 C24 C25 C20 0.4(2) . . . . ?
C23 C24 C29 C30 -71.6(2) . . . . ?
C23 C24 C29 C31 50.6(2) . . . . ?
C25 N3 C5 N1 -3.7(3) . . . . ?
C25 N3 C5 N2 170.63(14) . . . . ?
C25 N3 C19 C18 -171.10(14) . . . . ?
C25 C20 C21 C22 1.2(3) . . . . ?
C25 C20 C26 C27 -107.4(2) . . . . ?
C25 C20 C26 C28 128.32(18) . . . . ?
C25 C24 C29 C30 104.04(18) . . . . ?
C25 C24 C29 C31 -133.71(17) . . . . ?
C26 C20 C21 C22 -175.66(17) . . . . ?
C26 C20 C25 N3 -0.3(2) . . . . ?
C26 C20 C25 C24 175.53(16) . . . . ?
C29 C24 C25 N3 0.4(2) . . . . ?
C29 C24 C25 C20 -175.40(16) . . . . ?
C32 N5 C38 C33 71.0(2) . . . . ?
C32 N5 C38 C37 -112.19(17) . . . . ?
C32 N5 C45 C46 -0.39(18) . . . . ?
C32 N6 C46 C45 -0.12(18) . . . . ?
C32 N6 C52 C47 99.68(18) . . . . ?
C32 N6 C52 C51 -82.25(19) . . . . ?
C33 C34 C35 C36 0.1(3) . . . . ?
C34 C33 C38 N5 179.43(14) . . . . ?
C34 C33 C38 C37 2.8(2) . . . . ?
C34 C33 C39 C40 29.6(2) . . . . ?
C34 C33 C39 C41 -93.80(19) . . . . ?
C34 C35 C36 C37 1.5(3) . . . . ?
C35 C36 C37 C38 -0.9(3) . . . . ?
C35 C36 C37 C42 179.64(17) . . . . ?
C36 C37 C38 N5 -177.97(14) . . . . ?
C36 C37 C38 C33 -1.3(2) . . . . ?
C36 C37 C42 C43 -49.8(2) . . . . ?
C36 C37 C42 C44 73.9(2) . . . . ?
C38 N5 C32 N4 3.6(3) . . . . ?
C38 N5 C32 N6 -172.72(14) . . . . ?
C38 N5 C45 C46 172.95(14) . . . . ?
C38 C33 C34 C35 -2.1(3) . . . . ?
C38 C33 C39 C40 -154.09(16) . . . . ?
C38 C33 C39 C41 82.6(2) . . . . ?
C38 C37 C42 C43 130.71(17) . . . . ?
C38 C37 C42 C44 -105.58(18) . . . . ?
C39 C33 C34 C35 174.43(16) . . . . ?
C39 C33 C38 N5 3.0(2) . . . . ?
C39 C33 C38 C37 -173.70(15) . . . . ?
C42 C37 C38 N5 1.5(2) . . . . ?
C42 C37 C38 C33 178.15(15) . . . . ?
C45 N5 C32 N4 176.64(15) . . . . ?
C45 N5 C32 N6 0.31(16) . . . . ?
C45 N5 C38 C33 -101.18(17) . . . . ?
C45 N5 C38 C37 75.63(19) . . . . ?
C46 N6 C32 N4 -176.65(14) . . . . ?
C46 N6 C32 N5 -0.12(16) . . . . ?
C46 N6 C52 C47 -98.60(19) . . . . ?
C46 N6 C52 C51 79.46(19) . . . . ?
C47 C48 C49 C50 -0.3(3) . . . . ?
C48 C47 C52 N6 179.42(14) . . . . ?
C48 C47 C52 C51 1.5(2) . . . . ?
C48 C47 C53 C54 -73.5(2) . . . . ?
C48 C47 C53 C55 49.5(2) . . . . ?
C48 C49 C50 C51 0.5(3) . . . . ?
C49 C50 C51 C52 0.3(2) . . . . ?
C49 C50 C51 C56 -179.94(15) . . . . ?
C50 C51 C52 N6 -179.33(14) . . . . ?
C50 C51 C52 C47 -1.3(2) . . . . ?
C50 C51 C56 C57 57.1(2) . . . . ?
C50 C51 C56 C58 -67.55(19) . . . . ?
C52 N6 C32 N4 -12.7(2) . . . . ?
C52 N6 C32 N5 163.83(13) . . . . ?
C52 N6 C46 C45 -164.10(14) . . . . ?
C52 C47 C48 C49 -0.6(3) . . . . ?
C52 C47 C53 C54 103.05(19) . . . . ?
C52 C47 C53 C55 -133.96(18) . . . . ?
C52 C51 C56 C57 -123.16(17) . . . . ?
C52 C51 C56 C58 112.18(17) . . . . ?
C53 C47 C48 C49 176.08(16) . . . . ?
C53 C47 C52 N6 2.8(2) . . . . ?
C53 C47 C52 C51 -175.15(15) . . . . ?
C56 C51 C52 N6 0.9(2) . . . . ?
C56 C51 C52 C47 178.94(15) . . . . ?
C59 C60 C61 C62 -0.7(3) . . . . ?
C59 C64 B1 C70 174.78(14) . . . . ?
C59 C64 B1 C76 -63.38(18) . . . . ?
C59 C64 B1 C82 61.24(19) . . . . ?
C60 C59 C64 C63 2.0(2) . . . . ?
C60 C59 C64 B1 -178.22(16) . . . . ?
C60 C61 C62 C63 0.8(3) . . . . ?
C61 C62 C63 C64 0.6(3) . . . . ?
C62 C63 C64 C59 -1.9(2) . . . . ?
C62 C63 C64 B1 178.37(16) . . . . ?
C63 C64 B1 C70 -5.5(2) . . . . ?
C63 C64 B1 C76 116.34(17) . . . . ?
C63 C64 B1 C82 -119.04(17) . . . . ?
C64 C59 C60 C61 -0.8(3) . . . . ?
C65 C66 C67 C68 -1.4(2) . . . . ?
C65 C70 B1 C64 -57.36(19) . . . . ?
C65 C70 B1 C76 -177.74(14) . . . . ?
C65 C70 B1 C82 61.34(18) . . . . ?
C66 C65 C70 C69 1.2(2) . . . . ?
C66 C65 C70 B1 -170.11(15) . . . . ?
C66 C67 C68 C69 1.0(2) . . . . ?
C67 C68 C69 C70 0.5(2) . . . . ?
C68 C69 C70 C65 -1.6(2) . . . . ?
C68 C69 C70 B1 169.25(15) . . . . ?
C69 C70 B1 C64 132.17(16) . . . . ?
C69 C70 B1 C76 11.8(2) . . . . ?
C69 C70 B1 C82 -109.13(16) . . . . ?
C70 C65 C66 C67 0.3(3) . . . . ?
C71 C72 C73 C74 -0.8(3) . . . . ?
C71 C76 B1 C64 -53.97(19) . . . . ?
C71 C76 B1 C70 69.80(19) . . . . ?
C71 C76 B1 C82 -176.66(15) . . . . ?
C72 C71 C76 C75 0.3(3) . . . . ?
C72 C71 C76 B1 -178.00(16) . . . . ?
C72 C73 C74 C75 -0.3(3) . . . . ?
C73 C74 C75 C76 1.5(3) . . . . ?
C74 C75 C76 C71 -1.5(3) . . . . ?
C74 C75 C76 B1 176.71(16) . . . . ?
C75 C76 B1 C64 127.93(17) . . . . ?
C75 C76 B1 C70 -108.30(18) . . . . ?
C75 C76 B1 C82 5.2(2) . . . . ?
C76 C71 C72 C73 0.8(3) . . . . ?
C77 C78 C79 C80 0.5(3) . . . . ?
C77 C82 B1 C64 -177.49(15) . . . . ?
C77 C82 B1 C70 61.91(19) . . . . ?
C77 C82 B1 C76 -56.5(2) . . . . ?
C78 C77 C82 C81 -2.0(3) . . . . ?
C78 C77 C82 B1 -175.73(16) . . . . ?
C78 C79 C80 C81 -1.2(3) . . . . ?
C79 C80 C81 C82 0.3(2) . . . . ?
C80 C81 C82 C77 1.3(2) . . . . ?
C80 C81 C82 B1 174.73(15) . . . . ?
C81 C82 B1 C64 9.4(2) . . . . ?
C81 C82 B1 C70 -111.16(16) . . . . ?
C81 C82 B1 C76 130.46(16) . . . . ?
C82 C77 C78 C79 1.2(3) . . . . ?

_shelx_res_file                  
;
TITL i17584_a.res in Pbca
    i17584.res
    created by SHELXL-2018/3 at 10:49:41 on 11-Nov-2019
CELL 0.71073 20.4125 23.1642 30.2189 90 90 90
ZERR 8 0.0025 0.0025 0.0031 0 0 0
LATT 1
SYMM 0.5+X,0.5-Y,-Z
SYMM -X,0.5+Y,0.5-Z
SYMM 0.5-X,-Y,0.5+Z
SFAC C H B N O P
UNIT 656 800 8 48 8 8

L.S. 15
PLAN  -5 0 0
TEMP 23
HTAB
BOND $H
CONF
fmap 2
acta
OMIT 0 0 2
OMIT 3 18 6
OMIT 6 6 12
OMIT 0 10 0
OMIT 0 0 4
OMIT 0 12 9
OMIT 10 5 0
OMIT 12 9 12
REM <olex2.extras>
REM <HklSrc "%./i17584.hkl">
REM </olex2.extras>

WGHT    0.043900   10.386200
FVAR       0.16337
P1    6    0.782285    0.513171    0.388770    11.00000    0.01791    0.01950 =
         0.01714    0.00059   -0.00118   -0.00117
O1    5    0.725823    0.666342    0.436439    11.00000    0.04733    0.02264 =
         0.04200   -0.00362    0.00532    0.00546
N1    4    0.763901    0.480069    0.432990    11.00000    0.01769    0.02502 =
         0.01943    0.00321   -0.00161   -0.00060
N2    4    0.815013    0.460125    0.502024    11.00000    0.01716    0.01850 =
         0.01486   -0.00056    0.00025    0.00128
N3    4    0.822279    0.392206    0.452825    11.00000    0.01636    0.02054 =
         0.01544   -0.00179    0.00008   -0.00106
N4    4    0.741286    0.492130    0.346659    11.00000    0.01811    0.01903 =
         0.01877    0.00157   -0.00204   -0.00116
N5    4    0.758996    0.548407    0.279709    11.00000    0.01491    0.01885 =
         0.01735    0.00170    0.00006    0.00150
N6    4    0.658357    0.532942    0.300680    11.00000    0.01459    0.01828 =
         0.01889    0.00150   -0.00104   -0.00038
C1    1    0.868856    0.505658    0.379918    11.00000    0.01962    0.03733 =
         0.02218    0.00479   -0.00098   -0.00031
AFIX 137
H1A   2    0.891865    0.515561    0.406564    11.00000   -1.50000
H1B   2    0.882354    0.530939    0.356454    11.00000   -1.50000
H1C   2    0.878632    0.466457    0.372002    11.00000   -1.50000
AFIX   0
C2    1    0.764568    0.587903    0.396311    11.00000    0.03042    0.02213 =
         0.02629    0.00449   -0.00045   -0.00253
AFIX  43
H2    2    0.771180    0.612666    0.372501    11.00000   -1.20000
AFIX   0
C3    1    0.742662    0.610113    0.433622    11.00000    0.02651    0.02026 =
         0.03385    0.00042   -0.00406    0.00114
AFIX  43
H3    2    0.738734    0.586641    0.458448    11.00000   -1.20000
AFIX   0
C4    1    0.703371    0.685928    0.478801    11.00000    0.04841    0.03389 =
         0.04688   -0.01297    0.00574    0.00573
AFIX 137
H4A   2    0.683768    0.723388    0.475740    11.00000   -1.50000
H4B   2    0.739774    0.688224    0.498838    11.00000   -1.50000
H4C   2    0.671535    0.659292    0.490196    11.00000   -1.50000
AFIX   0
C5    1    0.799182    0.447016    0.459371    11.00000    0.01377    0.02023 =
         0.01732    0.00034    0.00191   -0.00270
C6    1    0.840473    0.558089    0.526767    11.00000    0.02254    0.02393 =
         0.02045   -0.00116   -0.00300    0.00193
C7    1    0.823067    0.605873    0.552363    11.00000    0.02992    0.02556 =
         0.03290   -0.00777   -0.00101    0.00009
AFIX  43
H7    2    0.851631    0.637046    0.554324    11.00000   -1.20000
AFIX   0
C8    1    0.764204    0.607649    0.574804    11.00000    0.03433    0.02817 =
         0.03396   -0.00960    0.00127    0.00697
AFIX  43
H8    2    0.753501    0.639832    0.591724    11.00000   -1.20000
AFIX   0
C9    1    0.721054    0.561669    0.572201    11.00000    0.02812    0.02825 =
         0.02923   -0.00299    0.00759    0.00664
AFIX  43
H9    2    0.681268    0.563676    0.587119    11.00000   -1.20000
AFIX   0
C10   1    0.736065    0.512199    0.547574    11.00000    0.02077    0.02505 =
         0.02336    0.00172    0.00292    0.00352
C11   1    0.796286    0.511920    0.525347    11.00000    0.02210    0.01937 =
         0.01607   -0.00161    0.00004    0.00354
C12   1    0.906071    0.556906    0.503136    11.00000    0.02197    0.02510 =
         0.02534   -0.00463    0.00020   -0.00405
AFIX  13
H12   2    0.906089    0.523738    0.483004    11.00000   -1.20000
AFIX   0
C13   1    0.917755    0.611489    0.475395    11.00000    0.03702    0.03439 =
         0.04028    0.00193    0.00402   -0.00856
AFIX 137
H13A  2    0.882518    0.616195    0.454666    11.00000   -1.50000
H13B  2    0.958381    0.607880    0.459631    11.00000   -1.50000
H13C  2    0.919669    0.644513    0.494545    11.00000   -1.50000
AFIX   0
C14   1    0.961732    0.548494    0.536247    11.00000    0.02326    0.04466 =
         0.03090   -0.00950   -0.00273   -0.00193
AFIX 137
H14A  2    0.959755    0.578206    0.558353    11.00000   -1.50000
H14B  2    1.002982    0.550572    0.521071    11.00000   -1.50000
H14C  2    0.957465    0.511413    0.550139    11.00000   -1.50000
AFIX   0
C15   1    0.687988    0.462460    0.544891    11.00000    0.02293    0.02558 =
         0.03788   -0.00217    0.00977    0.00190
AFIX  13
H15   2    0.711762    0.428713    0.533728    11.00000   -1.20000
AFIX   0
C16   1    0.633736    0.476308    0.512053    11.00000    0.03240    0.03948 =
         0.03992   -0.00356   -0.00028   -0.00701
AFIX 137
H16A  2    0.609993    0.509655    0.521981    11.00000   -1.50000
H16B  2    0.604425    0.444018    0.509914    11.00000   -1.50000
H16C  2    0.652552    0.483990    0.483540    11.00000   -1.50000
AFIX   0
C17   1    0.658909    0.446396    0.589929    11.00000    0.02598    0.04895 =
         0.04575    0.01197    0.00868   -0.00041
AFIX 137
H17A  2    0.693694    0.438343    0.610399    11.00000   -1.50000
H17B  2    0.631741    0.412815    0.586798    11.00000   -1.50000
H17C  2    0.633055    0.477956    0.600837    11.00000   -1.50000
AFIX   0
C18   1    0.847342    0.413943    0.521774    11.00000    0.01907    0.02162 =
         0.01529    0.00199   -0.00052    0.00176
AFIX  43
H18   2    0.863086    0.412535    0.550634    11.00000   -1.20000
AFIX   0
C19   1    0.851560    0.371947    0.491522    11.00000    0.01818    0.02110 =
         0.01868    0.00172    0.00054    0.00250
AFIX  43
H19   2    0.870552    0.335835    0.495559    11.00000   -1.20000
AFIX   0
C20   1    0.744724    0.338409    0.407356    11.00000    0.02182    0.02285 =
         0.02560   -0.00033   -0.00278   -0.00149
C21   1    0.734159    0.301259    0.371874    11.00000    0.02529    0.02703 =
         0.03877   -0.00565   -0.00861   -0.00595
AFIX  43
H21   2    0.691713    0.289243    0.365531    11.00000   -1.20000
AFIX   0
C22   1    0.785236    0.281810    0.345852    11.00000    0.03741    0.03011 =
         0.03494   -0.01474   -0.00831   -0.00379
AFIX  43
H22   2    0.776973    0.256774    0.322450    11.00000   -1.20000
AFIX   0
C23   1    0.848496    0.299478    0.354537    11.00000    0.02952    0.02828 =
         0.02672   -0.00975   -0.00118    0.00109
AFIX  43
H23   2    0.882527    0.285932    0.336904    11.00000   -1.20000
AFIX   0
C24   1    0.862399    0.337169    0.389158    11.00000    0.02261    0.02100 =
         0.02045   -0.00299   -0.00063   -0.00137
C25   1    0.809470    0.356040    0.414933    11.00000    0.02297    0.01938 =
         0.01755   -0.00282   -0.00175   -0.00171
C26   1    0.687344    0.354870    0.436715    11.00000    0.01881    0.03001 =
         0.02966    0.00001   -0.00052   -0.00344
AFIX  13
H26   2    0.702587    0.384426    0.457509    11.00000   -1.20000
AFIX   0
C27   1    0.664953    0.302618    0.463740    11.00000    0.03587    0.05148 =
         0.04868    0.02044    0.00954    0.00440
AFIX 137
H27A  2    0.650686    0.272595    0.444076    11.00000   -1.50000
H27B  2    0.629368    0.313686    0.482699    11.00000   -1.50000
H27C  2    0.700756    0.288789    0.481402    11.00000   -1.50000
AFIX   0
C28   1    0.631025    0.380335    0.410373    11.00000    0.02805    0.04354 =
         0.03660    0.00623   -0.00165    0.00521
AFIX 137
H28A  2    0.646341    0.413023    0.393810    11.00000   -1.50000
H28B  2    0.596958    0.392351    0.430244    11.00000   -1.50000
H28C  2    0.614149    0.351740    0.390403    11.00000   -1.50000
AFIX   0
C29   1    0.933135    0.352553    0.399155    11.00000    0.02124    0.02863 =
         0.02031   -0.00836    0.00239   -0.00019
AFIX  13
H29   2    0.933357    0.383979    0.420866    11.00000   -1.20000
AFIX   0
C30   1    0.967624    0.300217    0.419831    11.00000    0.02597    0.03991 =
         0.03296   -0.00329    0.00150    0.00510
AFIX 137
H30A  2    0.943275    0.287282    0.445137    11.00000   -1.50000
H30B  2    1.011036    0.310995    0.428833    11.00000   -1.50000
H30C  2    0.970132    0.269639    0.398454    11.00000   -1.50000
AFIX   0
C31   1    0.971614    0.372383    0.358540    11.00000    0.02718    0.03645 =
         0.02741   -0.00888    0.00696   -0.00332
AFIX 137
H31A  2    0.972632    0.341879    0.337046    11.00000   -1.50000
H31B  2    1.015562    0.382006    0.367116    11.00000   -1.50000
H31C  2    0.950827    0.405725    0.345937    11.00000   -1.50000
AFIX   0
C32   1    0.722190    0.522904    0.312357    11.00000    0.01689    0.01537 =
         0.01740   -0.00211   -0.00036    0.00025
C33   1    0.856337    0.491916    0.260197    11.00000    0.02118    0.02411 =
         0.01678    0.00065    0.00147    0.00271
C34   1    0.924160    0.490124    0.254861    11.00000    0.02196    0.03011 =
         0.03045   -0.00249    0.00622    0.00700
AFIX  43
H34   2    0.944030    0.455637    0.246606    11.00000   -1.20000
AFIX   0
C35   1    0.962396    0.538439    0.261574    11.00000    0.01691    0.03566 =
         0.04185    0.00077    0.00863    0.00152
AFIX  43
H35   2    1.007526    0.536094    0.257754    11.00000   -1.20000
AFIX   0
C36   1    0.934449    0.590079    0.273866    11.00000    0.01849    0.02672 =
         0.03526    0.00337    0.00452   -0.00329
AFIX  43
H36   2    0.960805    0.622466    0.277589    11.00000   -1.20000
AFIX   0
C37   1    0.866869    0.594439    0.280827    11.00000    0.01884    0.02148 =
         0.02187    0.00387    0.00166    0.00075
C38   1    0.829244    0.544557    0.274165    11.00000    0.01569    0.02344 =
         0.01600    0.00416    0.00161    0.00272
C39   1    0.814671    0.439751    0.248605    11.00000    0.02397    0.02244 =
         0.02260   -0.00440   -0.00071    0.00434
AFIX  13
H39   2    0.776550    0.439696    0.268319    11.00000   -1.20000
AFIX   0
C40   1    0.850126    0.382261    0.254416    11.00000    0.03787    0.02504 =
         0.04818   -0.00261   -0.01134    0.00361
AFIX 137
H40A  2    0.884192    0.379004    0.232657    11.00000   -1.50000
H40B  2    0.819530    0.351151    0.250757    11.00000   -1.50000
H40C  2    0.868964    0.380457    0.283492    11.00000   -1.50000
AFIX   0
C41   1    0.789742    0.445023    0.201303    11.00000    0.05541    0.03748 =
         0.03106   -0.00217   -0.01566    0.00003
AFIX 137
H41A  2    0.764731    0.479904    0.198325    11.00000   -1.50000
H41B  2    0.762503    0.412445    0.194444    11.00000   -1.50000
H41C  2    0.826271    0.446044    0.181309    11.00000   -1.50000
AFIX   0
C42   1    0.838098    0.651836    0.294564    11.00000    0.01779    0.01851 =
         0.04222    0.00125    0.00269   -0.00016
AFIX  13
H42   2    0.792749    0.645272    0.303945    11.00000   -1.20000
AFIX   0
C43   1    0.875798    0.677632    0.333860    11.00000    0.02928    0.02635 =
         0.05818   -0.01234    0.00240   -0.00039
AFIX 137
H43A  2    0.879180    0.649366    0.356980    11.00000   -1.50000
H43B  2    0.852881    0.710917    0.344751    11.00000   -1.50000
H43C  2    0.918895    0.688735    0.324410    11.00000   -1.50000
AFIX   0
C44   1    0.837115    0.693668    0.255154    11.00000    0.03064    0.02401 =
         0.06428    0.01626    0.00147   -0.00063
AFIX 137
H44A  2    0.881097    0.700212    0.245082    11.00000   -1.50000
H44B  2    0.817978    0.729654    0.264164    11.00000   -1.50000
H44C  2    0.811657    0.677292    0.231577    11.00000   -1.50000
AFIX   0
C45   1    0.717940    0.573953    0.248625    11.00000    0.02083    0.01853 =
         0.01889    0.00385   -0.00223    0.00180
AFIX  43
H45   2    0.731071    0.594080    0.223517    11.00000   -1.20000
AFIX   0
C46   1    0.656201    0.564335    0.261379    11.00000    0.02080    0.02042 =
         0.02101    0.00319   -0.00434    0.00171
AFIX  43
H46   2    0.618597    0.576415    0.246676    11.00000   -1.20000
AFIX   0
C47   1    0.565741    0.527040    0.352579    11.00000    0.01852    0.02654 =
         0.02493    0.00183   -0.00058    0.00064
C48   1    0.512666    0.495126    0.368414    11.00000    0.01981    0.03484 =
         0.02973    0.00442    0.00475    0.00026
AFIX  43
H48   2    0.487000    0.510280    0.391033    11.00000   -1.20000
AFIX   0
C49   1    0.497489    0.441661    0.351252    11.00000    0.01801    0.03159 =
         0.03728    0.01064   -0.00034   -0.00573
AFIX  43
H49   2    0.462020    0.421113    0.362434    11.00000   -1.20000
AFIX   0
C50   1    0.534695    0.418529    0.317571    11.00000    0.02222    0.02187 =
         0.03270    0.00500   -0.00599   -0.00422
AFIX  43
H50   2    0.523804    0.382537    0.306090    11.00000   -1.20000
AFIX   0
C51   1    0.588479    0.448295    0.300423    11.00000    0.01822    0.02092 =
         0.02423    0.00467   -0.00588    0.00084
C52   1    0.603075    0.502225    0.318984    11.00000    0.01328    0.02222 =
         0.02062    0.00350   -0.00327   -0.00125
C53   1    0.578600    0.587254    0.370052    11.00000    0.02461    0.03023 =
         0.03193   -0.00474    0.00800   -0.00236
AFIX  13
H53   2    0.621954    0.599461    0.359731    11.00000   -1.20000
AFIX   0
C54   1    0.527795    0.628962    0.351136    11.00000    0.04486    0.02824 =
         0.05198   -0.00165    0.00734    0.00192
AFIX 137
H54A  2    0.529017    0.627474    0.319399    11.00000   -1.50000
H54B  2    0.537497    0.667485    0.360846    11.00000   -1.50000
H54C  2    0.484958    0.618126    0.361282    11.00000   -1.50000
AFIX   0
C55   1    0.578232    0.589793    0.420502    11.00000    0.04525    0.05436 =
         0.03474   -0.01186    0.00460   -0.01175
AFIX 137
H55A  2    0.535540    0.579533    0.431261    11.00000   -1.50000
H55B  2    0.588854    0.628218    0.429998    11.00000   -1.50000
H55C  2    0.610069    0.563226    0.431991    11.00000   -1.50000
AFIX   0
C56   1    0.628392    0.421736    0.263359    11.00000    0.02349    0.01799 =
         0.02939    0.00021   -0.00221   -0.00061
AFIX  13
H56   2    0.661204    0.450191    0.254157    11.00000   -1.20000
AFIX   0
C57   1    0.585862    0.407832    0.223111    11.00000    0.03021    0.02613 =
         0.02824    0.00047   -0.00486    0.00251
AFIX 137
H57A  2    0.554389    0.378752    0.230880    11.00000   -1.50000
H57B  2    0.613080    0.393911    0.199504    11.00000   -1.50000
H57C  2    0.563406    0.442101    0.213673    11.00000   -1.50000
AFIX   0
C58   1    0.664940    0.368291    0.279977    11.00000    0.02665    0.02481 =
         0.03522   -0.00183   -0.00689    0.00345
AFIX 137
H58A  2    0.692328    0.378751    0.304527    11.00000   -1.50000
H58B  2    0.691550    0.352959    0.256568    11.00000   -1.50000
H58C  2    0.633873    0.339632    0.289263    11.00000   -1.50000
AFIX   0

C59   1    0.752130    0.277566    0.593444    11.00000    0.02458    0.02826 =
         0.02413    0.00163   -0.00079   -0.00232
AFIX  43
H59   2    0.772956    0.296473    0.570224    11.00000   -1.20000
AFIX   0
C60   1    0.685946    0.265000    0.589460    11.00000    0.02557    0.03731 =
         0.02943   -0.00159   -0.00738   -0.00060
AFIX  43
H60   2    0.663278    0.275921    0.564111    11.00000   -1.20000
AFIX   0
C61   1    0.653578    0.236246    0.623130    11.00000    0.02073    0.03579 =
         0.03944   -0.00789    0.00063   -0.00736
AFIX  43
H61   2    0.609114    0.228055    0.620767    11.00000   -1.20000
AFIX   0
C62   1    0.688126    0.219995    0.660082    11.00000    0.03087    0.02895 =
         0.03103   -0.00041    0.00395   -0.01059
AFIX  43
H62   2    0.667083    0.200231    0.682788    11.00000   -1.20000
AFIX   0
C63   1    0.754630    0.232995    0.663717    11.00000    0.02627    0.02245 =
         0.02589    0.00239   -0.00138   -0.00364
AFIX  43
H63   2    0.776996    0.221214    0.688962    11.00000   -1.20000
AFIX   0
C64   1    0.789039    0.262960    0.631038    11.00000    0.02203    0.01621 =
         0.02348   -0.00096   -0.00049    0.00019
C65   1    0.873526    0.288827    0.720849    11.00000    0.02293    0.01828 =
         0.02568    0.00367    0.00054    0.00151
AFIX  43
H65   2    0.833241    0.307464    0.719250    11.00000   -1.20000
AFIX   0
C66   1    0.904410    0.285136    0.761534    11.00000    0.03143    0.02298 =
         0.02139    0.00380    0.00182   -0.00136
AFIX  43
H66   2    0.884770    0.300926    0.786526    11.00000   -1.20000
AFIX   0
C67   1    0.964701    0.257853    0.764978    11.00000    0.03137    0.02091 =
         0.02390    0.00640   -0.00560   -0.00487
AFIX  43
H67   2    0.986294    0.255891    0.792036    11.00000   -1.20000
AFIX   0
C68   1    0.992169    0.233595    0.727437    11.00000    0.02205    0.01782 =
         0.03179    0.00575   -0.00535   -0.00060
AFIX  43
H68   2    1.032233    0.214646    0.729371    11.00000   -1.20000
AFIX   0
C69   1    0.960280    0.237351    0.686823    11.00000    0.02240    0.01794 =
         0.02447    0.00146    0.00054   -0.00021
AFIX  43
H69   2    0.979548    0.220426    0.662137    11.00000   -1.20000
AFIX   0
C70   1    0.900278    0.265701    0.681890    11.00000    0.02046    0.01499 =
         0.02323    0.00413   -0.00109   -0.00387
C71   1    0.898566    0.186488    0.591048    11.00000    0.02678    0.02933 =
         0.02342   -0.00063   -0.00022   -0.00358
AFIX  43
H71   2    0.871536    0.167751    0.611234    11.00000   -1.20000
AFIX   0
C72   1    0.930692    0.153638    0.559394    11.00000    0.03124    0.03143 =
         0.02955   -0.00796   -0.00349    0.00017
AFIX  43
H72   2    0.924512    0.113879    0.558465    11.00000   -1.20000
AFIX   0
C73   1    0.972011    0.180070    0.529143    11.00000    0.02529    0.04646 =
         0.02398   -0.00613   -0.00117    0.00786
AFIX  43
H73   2    0.994158    0.158289    0.508059    11.00000   -1.20000
AFIX   0
C74   1    0.979729    0.238973    0.530804    11.00000    0.02693    0.04597 =
         0.02759    0.00784    0.00511    0.00343
AFIX  43
H74   2    1.007472    0.257174    0.510772    11.00000   -1.20000
AFIX   0
C75   1    0.946184    0.271757    0.562386    11.00000    0.02488    0.02960 =
         0.02781    0.00731    0.00037    0.00229
AFIX  43
H75   2    0.951481    0.311633    0.562342    11.00000   -1.20000
AFIX   0
C76   1    0.904967    0.246801    0.594033    11.00000    0.01853    0.02601 =
         0.01980    0.00270   -0.00373    0.00105
C77   1    0.937638    0.377292    0.631794    11.00000    0.02554    0.02737 =
         0.03355    0.00788   -0.00801   -0.00293
AFIX  43
H77   2    0.974166    0.353315    0.631088    11.00000   -1.20000
AFIX   0
C78   1    0.947191    0.436658    0.632916    11.00000    0.03505    0.03186 =
         0.03498    0.00656   -0.00971   -0.01362
AFIX  43
H78   2    0.989498    0.451542    0.632385    11.00000   -1.20000
AFIX   0
C79   1    0.894296    0.473677    0.634815    11.00000    0.05030    0.02108 =
         0.02093   -0.00067   -0.00380   -0.00657
AFIX  43
H79   2    0.900541    0.513441    0.635340    11.00000   -1.20000
AFIX   0
C80   1    0.831943    0.450636    0.635921    11.00000    0.04092    0.02434 =
         0.01491   -0.00028    0.00345    0.00444
AFIX  43
H80   2    0.795828    0.474992    0.637765    11.00000   -1.20000
AFIX   0
C81   1    0.822848    0.390892    0.634283    11.00000    0.02842    0.02357 =
         0.01422    0.00078    0.00074    0.00030
AFIX  43
H81   2    0.780339    0.376474    0.634953    11.00000   -1.20000
AFIX   0
C82   1    0.874918    0.351900    0.631682    11.00000    0.02301    0.02266 =
         0.01551    0.00356   -0.00433   -0.00230
B1    3    0.866563    0.280985    0.633832    11.00000    0.01941    0.01889 =
         0.02166    0.00282   -0.00110   -0.00103
HKLF 4


REM  i17584_a.res in Pbca
REM wR2 = 0.121869, GooF = S = 1.03976, Restrained GooF = 1.03976 for all data
REM R1 = 0.046288 for 12176 Fo > 4sig(Fo) and 0.068294 for all 15911 data
REM 838 parameters refined using 0 restraints

END

WGHT      0.0435     10.4091

REM No hydrogen bonds found for HTAB generation

REM Highest difference peak  0.597,  deepest hole -0.611,  1-sigma level  0.048
Q1    1   0.7218  0.5025  0.3978  11.00000  0.05    0.60
Q2    1   0.8041  0.4773  0.3816  11.00000  0.05    0.29
Q3    1   0.7818  0.4520  0.4215  11.00000  0.05    0.26
Q4    1   0.5987  0.4989  0.5241  11.00000  0.05    0.26
Q5    1   0.7149  0.4885  0.5473  11.00000  0.05    0.25
;
_shelx_res_checksum              10578
_shelx_hkl_file                  
;
   1   0   0   -0.10    0.10
  -1   0   0    0.10    0.20
   2   0   0 9881.51  358.26
  -2   0   0 9999.00  359.36
   3   0   0    0.90    0.70
  -3   0   0    0.80    0.80
   4   0   0   58.79    3.80
  -4   0   0   54.49    3.80
  -4   0   0   54.39    3.20
   5   0   0   12.10    2.20
  -6   0   0  209.28    9.50
   6   0   0  215.48   10.50
  -6   0   0  217.68   10.60
  -8   0   0   60.39    5.30
  -8   0   0   52.49    4.10
  -8   0   0   47.50    5.20
   8   0   0   57.59    5.10
  -9   0   0   -0.10    1.70
   9   0   0    3.60    2.10
  -9   0   0    0.10    1.40
  -9   0   0    0.90    1.80
   9   0   0    4.50    2.20
  10   0   0 1045.40   40.70
 -10   0   0 1020.80   42.40
 -10   0   0  953.80   38.90
 -10   0   0 1005.00   41.30
 -11   0   0    2.30    1.70
 -11   0   0    0.30    1.80
  11   0   0    2.70    2.50
 -11   0   0   -4.40    1.70
 -12   0   0  203.18   12.60
  12   0   0  190.28   13.10
 -12   0   0  194.08   10.80
  12   0   0  203.18   12.10
 -12   0   0  205.28   13.50
 -13   0   0   -2.40    1.20
  13   0   0   -4.50    1.70
  13   0   0   -1.70    2.50
 -13   0   0    2.10    2.30
 -14   0   0   10.10    4.10
 -14   0   0   16.40    3.50
  14   0   0   12.40    4.10
  14   0   0   20.40    5.30
  15   0   0    3.80    3.60
 -15   0   0    1.20    2.10
  15   0   0    3.30    3.90
 -16   0   0  148.99   12.40
  16   0   0  183.78   12.70
 -16   0   0  161.08   10.50
  16   0   0  148.79   13.40
 -17   0   0    0.10    2.80
  17   0   0    2.10    3.80
  17   0   0   -1.50    3.10
 -17   0   0   -1.30    3.20
 -18   0   0   27.70    6.90
  18   0   0   36.40    8.80
 -18   0   0   31.40    5.60
  18   0   0   21.20    6.80
 -19   0   0   -4.10    2.20
 -19   0   0   -4.30    3.20
  19   0   0   -3.10    3.50
  19   0   0   -3.90    3.30
  20   0   0   47.40   10.20
 -20   0   0   42.30    7.00
  20   0   0   55.89    9.80
 -20   0   0   65.99   10.40
  21   0   0   -1.00    4.90
 -21   0   0    3.90    3.60
 -21   0   0   -4.40    4.00
  21   0   0    7.60    5.80
  22   0   0   19.30    7.40
  22   0   0   10.90    5.70
 -22   0   0   17.80    6.90
 -22   0   0   34.00    6.80
 -23   0   0   -1.20    4.50
 -23   0   0   -3.30    3.40
  23   0   0   -5.70    4.50
  23   0   0   -1.30    5.50
 -24   0   0   -4.70    4.80
 -24   0   0   -0.40    3.90
  24   0   0   17.00    8.30
  24   0   0    5.10    6.10
  25   0   0    2.40    5.80
 -25   0   0    1.00    4.20
 -25   0   0   -5.20    4.40
  25   0   0    1.50    5.20
  26   0   0    8.40    6.50
  26   0   0    7.00    7.40
 -26   0   0    6.60    4.60
 -26   0   0  -10.50    4.00
   0   1   0    0.10    0.10
   0  -1   0    0.00    0.10
   1   1   0   -0.40    0.10
  -1  -1   0   -0.10    0.20
   2   1   0 3107.29  110.39
  -2   1   0 2842.02  108.99
  -2  -1   0 3096.79  112.89
   2  -1   0 3126.49  109.09
  -3   1   0    0.30    0.80
   3  -1   0    0.60    0.80
  -3  -1   0   -0.20    0.70
   3   1   0    0.10    0.90
  -4   1   0 3216.28  116.29
  -4   1   0 3147.79  115.59
   4  -1   0 3230.18  116.39
  -4  -1   0 3225.58  115.59
   4   1   0 3237.98  116.39
  -4  -1   0 3248.67  116.39
   5   1   0    1.60    1.40
  -5  -1   0    0.50    1.10
   5  -1   0    1.60    1.40
  -5  -1   0   -1.30    1.10
  -5   1   0    0.40    1.10
  -5   1   0    1.00    1.50
  -6   1   0 2057.99   77.39
  -6  -1   0 2032.50   77.39
  -6   1   0 2072.19   76.19
   6   1   0 2195.88   77.59
   6  -1   0 2069.19   77.39
  -6  -1   0 2119.29   76.29
   7   1   0   -0.40    1.40
  -7  -1   0    2.70    1.80
  -7   1   0   -0.10    1.60
   7  -1   0    0.70    1.60
  -7   1   0   -1.70    0.90
  -7  -1   0    1.90    1.30
  -8  -1   0   81.39    5.20
   8  -1   0   85.39    6.30
  -8  -1   0   79.09    6.10
  -8   1   0   89.19    6.40
   8   1   0   84.59    6.30
  -8  -1   0   83.59    6.90
  -8   1   0   71.39    5.00
   9  -1   0    1.60    1.90
   9  -1   0   -1.90    2.20
  -9   1   0   -0.30    1.50
  -9  -1   0   -0.30    1.20
  -9   1   0   -0.20    1.20
   9   1   0   -0.40    1.50
  -9  -1   0    0.80    1.70
   9   1   0   -1.30    1.70
 -10   1   0 1116.39   48.20
 -10  -1   0 1137.59   48.10
 -10  -1   0 1213.68   46.40
 -10   1   0 1185.18   46.40
  10  -1   0 1315.97   48.20
  10  -1   0 1286.77   49.70
  10   1   0 1207.18   47.90
 -10  -1   0 1252.37   50.39
 -11   1   0    2.70    2.20
  11  -1   0    0.40    2.20
 -11   1   0    2.50    1.70
 -11  -1   0   -1.30    1.70
  11   1   0    1.50    2.30
 -11  -1   0    0.30    1.70
  11  -1   0   -1.90    2.10
 -12  -1   0    0.70    1.90
  12  -1   0    0.80    3.00
 -12  -1   0    4.00    2.30
 -12   1   0    0.40    2.30
  12   1   0    3.80    2.90
  12  -1   0    3.90    2.70
 -12  -1   0    1.90    2.70
 -12   1   0    0.10    1.80
  13   1   0   -0.40    2.30
  13  -1   0    4.30    3.00
 -13   1   0    0.60    2.40
 -13   1   0    1.00    1.90
 -13  -1   0    0.70    2.60
 -13  -1   0   -0.60    1.60
  13  -1   0   -4.20    2.50
 -13  -1   0    0.30    2.00
  14  -1   0   -0.30    2.80
  14  -1   0    4.20    3.30
 -14  -1   0   -0.90    2.20
 -14   1   0   -1.70    1.40
 -14  -1   0    0.80    1.90
  14   1   0    3.60    3.00
 -14   1   0   -4.00    2.30
 -14  -1   0    4.00    3.20
 -15  -1   0   -1.60    2.40
  15   1   0    0.60    3.40
 -15   1   0   -3.00    1.80
 -15   1   0   -2.00    1.70
  15  -1   0   -5.10    2.40
  15  -1   0   -1.60    2.90
 -15  -1   0    2.10    2.30
  15   1   0   -1.60    3.20
  16   1   0  112.69   10.10
  16  -1   0  119.59   13.70
  16   1   0  119.29   13.60
 -16   1   0  105.29    8.10
 -16   1   0  117.59   10.50
 -16  -1   0   99.89    9.90
  16  -1   0   99.59   11.30
 -16  -1   0   97.09    8.10
 -17   1   0   -0.80    2.40
 -17   1   0    2.30    3.70
  17  -1   0   -0.90    3.50
 -17  -1   0   -3.20    2.20
  17   1   0   10.20    5.60
  17  -1   0   -5.00    2.70
 -17  -1   0    1.80    3.80
  17   1   0    0.70    3.20
  18  -1   0   56.09    9.80
  18   1   0   57.69    9.90
  18  -1   0   55.99    9.20
 -18  -1   0   62.69    9.60
 -18   1   0   65.69    9.70
  18   1   0   65.19    9.80
 -18   1   0   61.79    7.60
 -18  -1   0   60.39    7.70
 -19   1   0    0.20    4.20
  19  -1   0    2.90    5.40
 -19   1   0   -2.70    2.90
  19   1   0    2.10    5.10
 -19  -1   0    0.80    3.80
 -19  -1   0   -0.50    3.20
  19   1   0   -2.70    3.40
  19  -1   0   -0.10    3.90
 -20   1   0    3.30    5.20
 -20  -1   0    7.90    5.70
  20   1   0   11.70    5.90
  20   1   0    7.30    6.50
 -20  -1   0    5.40    3.70
 -20   1   0    5.50    4.10
  20  -1   0    8.50    5.00
  20  -1   0    5.90    5.60
 -21  -1   0   -2.50    2.10
  21  -1   0   -3.80    3.40
  21  -1   0   -2.20    5.20
  21   1   0   -2.30    3.40
  21   1   0   -2.50    4.60
 -21   1   0   -9.10    2.80
 -21   1   0    3.10    3.40
 -21  -1   0   -5.70    3.10
  22  -1   0   10.60    6.50
 -22  -1   0    5.30    4.10
  22   1   0    0.20    4.90
  22  -1   0   12.10    6.50
 -22   1   0   10.20    5.90
  22   1   0   16.50    6.90
 -22   1   0   18.40    5.40
 -22  -1   0   -0.10    5.40
  23   1   0    7.10    5.20
 -23  -1   0   -6.10    2.90
 -23   1   0   -0.20    3.80
  23   1   0   -2.40    5.40
  23  -1   0   10.40    6.60
 -23  -1   0   -6.20    3.90
 -23   1   0    1.40    4.80
  23  -1   0    2.90    6.00
 -24   1   0   19.20    5.80
  24   1   0   22.50    8.90
  24  -1   0   12.00    7.30
 -24  -1   0   11.30    5.20
  24   1   0   43.90    9.90
 -24   1   0   20.40    8.30
 -24  -1   0   20.70    8.70
  24  -1   0   12.90    6.90
  25  -1   0   -7.20    5.80
  25   1   0   -6.80    5.70
 -25  -1   0   -6.50    4.80
 -25  -1   0   -2.20    3.20
  25   1   0   -0.70    5.70
  25  -1   0    0.90    5.10
 -25   1   0   -3.20    2.70
 -25   1   0   -5.80    4.70
 -26  -1   0   93.69   15.70
 -26  -1   0   82.39   10.80
 -26   1   0   76.79   13.90
  26   1   0   69.39   12.60
  26  -1   0   79.29   14.70
 -26   1   0   91.99   11.60
  26  -1   0   71.99   13.20
   0   2   0 5856.81  211.98
   1   2   0    0.30    0.40
   1   2   0    0.20    0.50
  -1  -2   0    0.30    0.40
  -1  -2   0    0.30    0.50
  -2  -2   0 2311.77   82.49
   2   2   0 2255.77   82.39
  -3   2   0    0.30    0.90
   3   2   0   -0.50    0.90
  -3   2   0    0.10    0.70
  -3  -2   0    0.40    0.70
  -3  -2   0   -0.40    0.80
  -4  -2   0    0.40    0.90
   4  -2   0   -0.40    1.10
  -4   2   0    0.50    0.90
  -4   2   0    0.70    1.20
  -4  -2   0   -0.10    1.00
   4   2   0   -0.90    1.10
  -5   2   0    0.20    1.00
  -5  -2   0   -0.90    1.00
   5   2   0    1.50    1.50
   5  -2   0   -2.10    1.30
  -5  -2   0    0.30    1.30
  -5   2   0   -0.10    1.20
  -6   2   0  346.17   14.40
  -6   2   0  351.86   15.50
   6  -2   0  365.66   15.60
   6   2   0  332.17   15.40
  -6  -2   0  343.07   15.40
  -6  -2   0  338.37   14.40
  -7   2   0   -1.10    1.30
  -7  -2   0   -0.80    1.00
   7   2   0    0.20    1.50
  -7   2   0    1.80    1.30
   7  -2   0   -1.80    1.20
  -7  -2   0    0.70    1.50
  -8  -2   0  109.99    8.60
   8  -2   0  103.69    7.10
  -8   2   0  102.99    7.10
  -8  -2   0   90.19    6.80
  -8   2   0   96.69    5.90
  -8  -2   0   99.49    6.00
   8   2   0  101.99    7.00
   9   2   0    0.60    1.90
  -9  -2   0    0.40    1.60
  -9   2   0   -0.30    1.20
  -9   2   0   -0.60    1.60
  -9  -2   0   -2.20    0.90
   9   2   0   -0.30    2.10
   9  -2   0   -2.00    1.80
  -9  -2   0    0.90    2.10
   9  -2   0    0.60    1.80
  10  -2   0   -2.20    2.30
 -10   2   0    1.20    1.70
  10   2   0    0.40    2.40
 -10  -2   0    1.40    2.00
 -10   2   0   -1.90    2.00
 -10  -2   0   -0.40    1.60
 -11  -2   0   -2.00    1.60
 -11   2   0    0.60    1.70
  11   2   0    0.50    2.20
 -11   2   0   -1.90    1.50
 -11  -2   0   -1.80    1.60
  11  -2   0    3.50    3.10
 -11  -2   0   -3.40    1.90
 -12  -2   0   76.59    7.90
 -12   2   0   75.79    6.00
 -12  -2   0   74.89    7.40
  12   2   0   76.99    8.10
 -12   2   0   68.39    6.90
  12  -2   0   70.89    7.70
  12  -2   0   70.69    8.60
 -12  -2   0   68.69    5.80
  13  -2   0    1.50    2.40
  13   2   0   -1.50    2.50
 -13   2   0   -2.40    1.40
 -13   2   0   -4.30    1.50
 -13  -2   0   -1.90    1.90
  13  -2   0   -1.50    2.20
 -13  -2   0    2.80    2.20
  14  -2   0  353.26   20.20
  14   2   0  336.67   18.60
 -14  -2   0  326.37   20.10
  14  -2   0  316.47   18.20
 -14   2   0  355.96   16.90
 -14  -2   0  357.76   17.30
 -14   2   0  363.46   19.70
 -14  -2   0  368.66   19.50
 -15   2   0    1.60    2.50
 -15  -2   0    3.60    3.20
  15  -2   0   -5.70    2.20
  15  -2   0   -2.80    2.50
 -15  -2   0   -0.20    2.10
 -15   2   0    2.50    2.60
  15   2   0   -0.10    2.90
 -15  -2   0   -0.20    2.20
 -16  -2   0   25.20    6.10
  16   2   0   11.00    5.00
  16  -2   0   24.60    6.80
 -16  -2   0   34.30    6.90
  16  -2   0   16.70    5.30
 -16   2   0   28.20    4.90
 -16   2   0   11.60    4.60
 -16  -2   0   18.10    4.40
  17   2   0    0.40    3.10
 -17   2   0   -2.70    3.10
  17   2   0    0.50    4.00
  17  -2   0   -5.30    3.10
  17  -2   0   -1.20    3.20
 -17  -2   0    1.50    3.40
 -17  -2   0    1.00    2.90
 -17   2   0    0.10    2.80
  18  -2   0   89.59   11.50
 -18  -2   0   80.69    8.70
  18   2   0   90.69   11.00
 -18   2   0   91.79    9.30
  18  -2   0   57.79   10.30
 -18  -2   0   80.29   10.80
 -18   2   0   83.59   11.00
  18   2   0  102.99   13.20
 -19   2   0    1.30    2.80
  19   2   0   -3.20    3.40
 -19   2   0    0.30    3.60
 -19  -2   0    2.70    4.20
  19   2   0    2.40    5.50
  19  -2   0    3.40    5.10
 -19  -2   0   -0.10    2.70
  19  -2   0   -1.60    3.90
 -20   2   0   57.29    9.70
 -20  -2   0   61.69    8.20
 -20   2   0   51.49    7.60
  20  -2   0   66.39   12.00
  20  -2   0   47.70    9.60
  20   2   0   45.00   10.30
  20   2   0   42.80    9.30
 -20  -2   0   42.20    9.10
 -21  -2   0   -3.70    2.10
 -21   2   0   -2.60    3.90
  21   2   0    1.30    5.50
 -21   2   0    1.10    3.30
  21   2   0   -4.00    3.50
  21  -2   0   -5.80    4.70
  21  -2   0    7.90    5.60
 -21  -2   0    0.60    4.20
 -22   2   0   12.60    4.60
 -22  -2   0   17.50    5.40
 -22  -2   0   22.10    7.70
  22   2   0   16.00    7.70
 -22   2   0    5.00    5.80
  22  -2   0   27.00    7.70
  22  -2   0   23.20    8.50
  22   2   0   22.40    6.80
 -23  -2   0    1.50    3.50
 -23   2   0    3.40    3.90
  23   2   0    5.20    5.90
 -23  -2   0   -5.20    4.00
 -23   2   0   10.00    5.40
  23  -2   0   -5.60    5.40
  23  -2   0    4.00    4.70
  23   2   0    0.00    5.10
  24  -2   0   10.60    6.70
 -24  -2   0   -1.90    4.60
  24   2   0   -9.60    4.20
 -24  -2   0    3.80    4.00
  24  -2   0   -6.20    4.00
 -24   2   0   -3.70    3.40
 -24   2   0   -3.50    4.70
  24   2   0   -2.50    4.10
 -25  -2   0    8.20    7.10
 -25   2   0    1.20    5.80
  25  -2   0   10.80    8.20
  25   2   0    4.90    7.40
  25  -2   0   -2.70    4.90
 -25  -2   0   11.20    5.10
 -25   2   0   -2.10    3.50
  25   2   0   10.80    7.00
  26  -2   0   15.40    8.40
 -26  -2   0   16.80    8.20
  26   2   0    5.20    6.00
 -26   2   0   28.80   11.80
  26  -2   0   10.90    7.00
 -26   2   0   19.30    5.80
 -26   2   0   17.00    7.70
  26   2   0   22.20    9.80
 -26  -2   0   25.20    6.70
   0   3   0    0.50    0.60
   0  -3   0    0.40    0.60
   1   3   0    0.20    0.60
   1  -3   0   -0.40    0.50
   1   3   0    0.20    0.50
  -1  -3   0   -0.10    0.60
  -1   3   0    0.60    0.60
  -1  -3   0    0.00    0.60
   2   3   0  488.15   18.60
   2   3   0  495.65   19.10
  -2  -3   0  468.55   18.50
  -2  -3   0  504.25   19.10
   3   3   0    0.40    1.00
  -3  -3   0   -0.10    1.00
  -4   3   0 4951.50  172.28
   4   3   0 4960.50  173.08
   4   3   0 4939.31  172.48
  -4  -3   0 4804.82  172.98
  -4   3   0 4359.06  172.88
   5   3   0    0.60    1.40
  -5  -3   0    0.30    1.10
  -5   3   0   -0.50    1.00
  -5  -3   0    1.40    1.40
  -5   3   0   -0.80    1.50
   6   3   0  138.39    7.80
  -6   3   0  133.29    6.90
   6  -3   0  138.89    8.10
  -6  -3   0  137.59    7.00
  -6   3   0  145.19    8.10
  -6  -3   0  129.49    7.80
   7  -3   0   -0.60    1.50
  -7   3   0    1.40    1.30
  -7  -3   0   -0.10    1.50
  -7   3   0    0.30    1.60
  -7  -3   0    0.40    1.20
   7   3   0    1.40    1.60
  -8  -3   0   89.19    7.80
  -8  -3   0  101.39    7.10
  -8  -3   0   86.39    5.70
   8   3   0   96.99    7.00
  -8   3   0   91.39    6.80
   8  -3   0  105.29    7.20
  -8   3   0   95.89    6.00
  -9   3   0    1.60    2.00
   9   3   0    0.60    1.80
  -9  -3   0    0.00    1.80
  -9  -3   0    0.40    1.50
   9  -3   0    0.30    2.00
   9  -3   0    0.80    2.00
  -9  -3   0   -0.70    2.00
   9   3   0   -0.90    2.10
  -9   3   0   -1.20    1.20
  10  -3   0 1612.84   65.29
 -10  -3   0 1672.63   64.69
 -10  -3   0 1597.44   66.59
 -10   3   0 1689.93   62.59
  10   3   0 1725.03   64.39
 -10  -3   0 1715.53   62.89
 -10   3   0 1626.94   64.49
 -11  -3   0   -0.70    1.40
 -11  -3   0    4.80    3.00
 -11   3   0    0.20    1.40
  11  -3   0    4.30    2.90
  11   3   0   -1.60    1.90
 -11   3   0    0.10    1.90
 -11  -3   0    2.30    2.40
 -12  -3   0  153.38   11.00
 -12   3   0  166.78   11.10
 -12  -3   0  146.99    9.20
  12   3   0  157.98   10.70
 -12  -3   0  198.68   12.90
 -12   3   0  156.48    9.20
  12  -3   0  134.89   10.90
  13  -3   0    5.60    3.80
 -13   3   0    1.70    2.00
 -13  -3   0    0.30    1.70
 -13   3   0   -2.00    1.80
 -13  -3   0    2.70    3.20
  13   3   0   -3.10    2.30
 -13  -3   0   -3.70    1.50
 -14   3   0   34.70    6.10
 -14  -3   0   28.70    5.80
  14  -3   0   36.60    6.80
  14   3   0   36.10    6.70
  14  -3   0   33.70    5.90
 -14  -3   0   44.10    7.60
 -14  -3   0   34.20    5.00
 -14   3   0   32.00    4.90
 -15   3   0   -3.30    1.40
 -15  -3   0   -1.60    1.70
  15  -3   0    5.70    3.70
  15   3   0   -1.70    2.60
 -15  -3   0   11.60    3.90
  15  -3   0   -0.70    3.60
 -15   3   0    2.00    3.10
 -15  -3   0    0.60    3.10
  16  -3   0    6.40    3.90
 -16  -3   0    2.80    4.10
 -16   3   0   10.20    3.40
  16  -3   0    9.90    4.80
 -16  -3   0   15.30    5.00
 -16   3   0   10.00    4.40
 -16  -3   0   15.40    3.90
  16   3   0    1.70    3.90
 -17  -3   0    7.20    4.20
  17   3   0    3.90    4.00
 -17   3   0    5.00    4.10
 -17   3   0    1.60    2.90
 -17  -3   0    7.30    3.30
  17  -3   0    5.00    4.70
 -17  -3   0    1.10    3.10
  17  -3   0    6.10    4.60
 -18  -3   0   85.99   11.00
  18  -3   0   58.59    9.10
 -18   3   0   62.59    9.90
  18  -3   0   59.59    9.90
 -18  -3   0   71.19   11.50
 -18   3   0   53.59    7.20
  18   3   0   56.59    9.30
 -18  -3   0   65.19    8.00
  19  -3   0   -1.00    3.50
  19   3   0   -1.10    5.20
 -19   3   0   -6.40    3.10
 -19   3   0    5.50    3.50
 -19  -3   0    3.40    3.30
  19  -3   0    2.50    4.70
 -19  -3   0    0.70    4.00
  19   3   0    0.50    4.00
  20  -3   0  103.59   14.00
  20   3   0  114.89   13.70
  20  -3   0  122.39   13.70
 -20   3   0  129.89   10.50
  20   3   0  126.39   16.20
 -20   3   0  131.79   13.30
 -20  -3   0  107.89   13.80
 -20  -3   0  127.09   10.20
 -21   3   0    0.40    4.50
 -21   3   0   -1.10    3.00
  21  -3   0   -3.10    4.60
  21   3   0   -2.00    4.40
  21  -3   0   -4.00    4.30
 -21  -3   0    0.10    3.20
  21   3   0    5.80    5.80
 -21  -3   0    4.90    4.80
 -22  -3   0   48.80   10.40
 -22   3   0   58.79   11.40
  22   3   0   60.89   12.50
  22  -3   0   49.90   11.30
  22   3   0   63.19   10.70
 -22  -3   0   55.59    8.60
 -22   3   0   53.69    7.90
  22  -3   0   44.20    9.20
 -23   3   0   -4.00    3.60
 -23  -3   0   12.00    7.00
  23   3   0    1.00    4.20
  23   3   0    1.30    6.40
 -23  -3   0    5.80    3.90
  23  -3   0    2.40    5.20
 -23   3   0    3.20    4.00
  23  -3   0    6.10    6.10
 -24  -3   0   43.00   10.30
 -24   3   0   46.20    8.00
  24  -3   0   53.19   10.90
  24   3   0   37.40    9.80
  24   3   0   46.40   11.70
 -24  -3   0   53.19    8.90
  24  -3   0   43.10   10.30
 -24   3   0   31.00   11.70
 -24   3   0   60.69   11.80
 -25   3   0    2.10    4.20
 -25  -3   0   -0.60    5.50
  25   3   0   -7.20    5.90
  25  -3   0    0.40    5.80
  25   3   0    4.90    5.30
  25  -3   0    2.90    6.80
 -25   3   0   17.30    7.00
 -25  -3   0   -4.60    2.80
 -25   3   0   -0.10    7.00
 -26  -3   0  122.49   17.10
 -26   3   0  119.19   16.60
  26   3   0  107.79   17.70
 -26  -3   0  119.29   13.00
  26   3   0  127.79   17.00
 -26   3   0   93.89   18.40
  26  -3   0  100.09   16.00
 -26   3   0  111.89   12.80
  26  -3   0   93.79   15.10
   0  -4   0 3447.46  125.19
   0   4   0 3514.95  125.19
  -1   4   0   -0.10    0.70
   1   4   0   -0.40    0.90
  -1  -4   0   -0.50    0.60
   1  -4   0    1.50    0.90
   1   4   0    0.00    0.70
  -1  -4   0    0.00    0.80
  -2  -4   0  553.34   21.40
   2   4   0  622.64   21.80
   2   4   0  506.85   20.80
  -2  -4   0  505.95   20.70
   3   4   0    0.50    1.10
  -3  -4   0   -0.60    1.10
  -3  -4   0    0.00    1.00
   4   4   0 1764.72   63.39
  -4   4   0 1728.93   62.69
   4   4   0 1708.83   62.49
  -4  -4   0 1613.24   63.19
  -5   4   0   -0.10    1.20
   5   4   0    1.00    1.40
  -5   4   0    1.00    1.40
  -5  -4   0   -0.80    1.30
   5   4   0    0.90    1.40
  -6   4   0  263.87   12.60
   6   4   0  236.98   11.60
  -6   4   0  208.78   10.50
  -6   4   0  222.98   11.60
  -6  -4   0  242.18   11.80
  -7  -4   0    0.30    1.80
  -7   4   0    1.00    1.30
   7   4   0   -2.20    1.30
  -7   4   0    1.90    2.30
  -7  -4   0   -0.80    1.10
  -7  -4   0    1.90    2.60
  -7   4   0   -1.70    1.60
   8   4   0  704.83   28.20
   8   4   0  635.34   29.30
  -8  -4   0  646.44   26.40
  -8   4   0  660.73   26.50
  -8  -4   0  662.23   28.00
  -8   4   0  651.13   27.90
  -8  -4   0  659.13   29.80
   9   4   0   -0.40    2.00
  -9  -4   0    0.60    1.40
   9   4   0   -1.80    1.80
  -9  -4   0    2.40    2.30
  -9   4   0   -2.20    1.30
   9  -4   0    0.70    2.20
  -9  -4   0    2.70    2.80
  -9   4   0    0.60    1.90
 -10  -4   0  566.64   27.20
  10  -4   0  565.04   25.60
 -10  -4   0  543.95   23.10
 -10   4   0  531.25   23.00
 -10   4   0  546.65   24.90
  10   4   0  567.74   24.60
 -10  -4   0  529.45   24.80
 -11  -4   0    2.80    2.40
  11   4   0   -0.90    2.00
 -11  -4   0   -2.00    1.60
 -11  -4   0    1.40    1.70
  11  -4   0    1.40    2.80
 -11   4   0   -1.00    1.60
 -11   4   0    1.80    2.20
  12  -4   0  117.69    9.70
 -12  -4   0  103.99    9.00
 -12  -4   0  106.79   10.30
 -12  -4   0  119.59    7.80
 -12   4   0  114.19    7.60
 -12   4   0  108.39    8.80
  12   4   0  101.99    8.70
 -13   4   0    0.70    2.20
  13  -4   0   -2.30    2.30
 -13   4   0   -2.70    1.30
 -13  -4   0   -2.30    2.30
  13   4   0    0.70    2.60
 -13  -4   0   -0.20    2.00
 -14  -4   0   -3.60    2.30
  14  -4   0    0.90    3.20
 -14  -4   0   -2.70    1.80
 -14  -4   0    2.60    2.50
  14   4   0    0.30    2.50
 -14   4   0    3.00    3.00
 -14   4   0    1.70    2.40
 -15  -4   0   -5.30    2.50
  15  -4   0   -2.50    3.50
 -15  -4   0    5.90    2.90
  15   4   0    0.10    3.40
 -15  -4   0   -3.00    2.70
 -15   4   0    2.00    3.10
 -15   4   0    0.30    2.00
 -16  -4   0  236.18   16.60
 -16   4   0  265.57   17.20
 -16  -4   0  264.87   14.50
  16  -4   0  273.17   18.20
 -16  -4   0  272.87   18.40
  16   4   0  262.57   16.40
 -16   4   0  274.67   14.70
  16  -4   0  244.48   15.80
 -17  -4   0    5.20    4.30
 -17  -4   0    2.00    3.10
 -17   4   0   -2.00    2.00
  17   4   0   -3.00    3.70
  17  -4   0    1.70    3.80
  17  -4   0   -0.70    4.10
 -17   4   0    8.00    4.40
 -17  -4   0   -6.40    2.20
 -18  -4   0   82.29    9.00
 -18  -4   0   76.29   10.70
  18  -4   0   56.29    9.00
 -18   4   0   84.09   11.40
  18  -4   0   49.99    9.10
 -18   4   0   72.09    8.20
 -18  -4   0   89.89    9.20
  18   4   0   69.49    9.90
 -19   4   0   -4.70    2.70
  19  -4   0    2.30    4.30
 -19  -4   0    4.70    3.30
  19   4   0    2.90    4.00
 -19  -4   0   -2.20    3.60
 -19  -4   0    2.20    3.00
 -19   4   0   -1.20    3.00
  19  -4   0   -0.20    4.40
  20  -4   0  119.29   13.90
  20   4   0  148.49   17.60
 -20   4   0  145.59   14.30
 -20   4   0  155.48   11.70
  20   4   0  171.08   14.30
 -20  -4   0  150.98   14.00
  20  -4   0  161.78   15.10
 -20  -4   0  135.69   11.20
 -21   4   0    1.70    3.10
 -21   4   0    3.30    5.50
  21   4   0   -4.40    4.00
 -21  -4   0   -6.60    3.90
  21  -4   0   -0.60    3.90
 -21  -4   0   10.00    4.70
  21   4   0    5.50    5.40
 -21   4   0   -6.50    4.40
  21  -4   0    0.50    4.20
  22  -4   0   14.30    6.90
  22   4   0   12.90    6.90
 -22   4   0    3.70    6.10
  22  -4   0   20.80    7.50
 -22   4   0   20.50    7.30
  22   4   0   17.00    7.00
 -22  -4   0   21.20    6.10
 -22   4   0   12.40    5.00
 -22  -4   0   12.60    7.40
  23   4   0   -0.40    5.50
  23  -4   0   -3.10    4.30
  23  -4   0    2.10    5.60
 -23   4   0   -5.10    3.10
 -23   4   0  -17.60    4.60
 -23  -4   0   -2.30    3.00
 -23  -4   0    3.00    5.00
 -23   4   0    0.60    3.20
  23   4   0    6.20    5.10
 -24  -4   0    0.40    3.40
  24   4   0    7.10    7.10
  24   4   0    4.10    6.00
 -24   4   0   -8.70    6.40
 -24   4   0   -1.20    5.10
 -24   4   0    2.80    4.30
 -24  -4   0   11.10    6.20
  24  -4   0   11.60    7.20
 -25  -4   0   -4.50    5.10
 -25   4   0   -4.80    6.00
  25  -4   0    6.10    6.40
  25   4   0    1.70    5.40
  25   4   0  -10.50    5.40
 -25   4   0   -2.40    3.40
 -25   4   0    1.00    5.60
  26   4   0   25.70    8.70
  26  -4   0   16.30    7.90
   1   5   0    0.30    1.10
   1   5   0    0.20    0.90
   1   5   0    1.20    0.90
  -1  -5   0   -0.20    0.80
   1  -5   0    1.30    1.20
  -1  -5   0   -0.30    1.10
  -1   5   0   -0.70    0.90
  -2   5   0    7.50    1.80
   2   5   0    9.80    1.60
   2   5   0    5.40    1.50
  -2  -5   0    8.10    1.90
   2   5   0    5.60    1.70
  -2  -5   0    9.50    1.60
   3   5   0   -1.10    1.20
  -3  -5   0   -1.00    1.10
  -3  -5   0   -0.10    1.20
   3   5   0   -1.10    1.00
   3   5   0    0.60    1.00
  -4  -5   0  231.98   11.60
   4   5   0  243.88   11.80
   4   5   0  259.37   11.00
  -4  -5   0  257.67   11.00
  -5   5   0    1.30    1.50
  -5  -5   0    4.30    1.80
   5   5   0    2.90    1.40
   5   5   0    4.30    1.90
  -6   5   0  248.68   12.60
   6   5   0  247.48   11.60
  -6   5   0  245.18   11.40
  -6  -5   0  250.97   12.40
  -6  -5   0  251.07   15.20
  -6   5   0  223.78   12.40
   6   5   0  246.68   12.30
  -7   5   0    0.40    1.70
   7   5   0    0.20    1.70
  -7   5   0   -1.70    1.80
  -7   5   0    1.50    1.40
  -7  -5   0    0.20    2.00
  -7  -5   0   -2.00    1.30
   8   5   0  367.56   17.70
  -8   5   0  371.26   16.50
  -8   5   0  354.56   17.80
  -8  -5   0  377.56   19.50
   8   5   0  384.46   17.40
  -8  -5   0  388.86   18.00
  -8  -5   0  387.36   16.90
  -8   5   0  376.26   18.80
  -9  -5   0    4.30    2.30
  -9   5   0    1.20    2.70
   9  -5   0    5.30    2.90
  -9  -5   0   -2.20    2.10
  -9   5   0    2.10    2.20
   9   5   0    0.90    2.20
  -9   5   0   -0.40    1.50
 -10  -5   0   18.70    5.00
 -10   5   0   14.20    3.10
 -10  -5   0   10.10    3.20
 -10   5   0   14.00    3.60
  10  -5   0   14.20    3.80
  10   5   0   14.20    3.50
 -10   5   0   10.90    3.90
 -11  -5   0    2.30    1.90
 -11  -5   0    5.50    3.20
  11   5   0    1.20    2.40
 -11   5   0    0.80    3.40
  11  -5   0    4.90    2.90
 -11   5   0    3.80    2.50
 -11   5   0    1.90    2.00
 -11  -5   0    0.40    2.30
  12  -5   0   15.50    4.60
 -12  -5   0   12.00    3.90
 -12   5   0   13.70    3.30
 -12  -5   0   14.70    3.40
 -12   5   0   15.80    4.10
  12   5   0   12.60    3.90
 -12  -5   0   11.20    4.60
 -13  -5   0    2.50    2.50
 -13   5   0    0.90    2.40
 -13   5   0   -1.70    1.70
  13   5   0   -0.80    2.70
 -13  -5   0    0.40    2.20
 -13  -5   0   -1.60    2.10
  13  -5   0    0.10    3.20
 -14   5   0   21.20    4.20
 -14  -5   0   15.90    3.80
 -14  -5   0   17.70    6.00
 -14  -5   0   16.50    4.70
  14  -5   0   17.80    5.60
  14   5   0   11.90    4.10
 -14   5   0   11.50    3.90
 -15  -5   0   -0.20    2.90
 -15   5   0    0.80    2.10
  15   5   0    6.30    3.90
 -15  -5   0   -3.50    1.70
 -15  -5   0    2.20    3.50
  15  -5   0    2.40    3.70
 -15   5   0   -0.10    2.50
 -16   5   0   23.70    4.90
 -16  -5   0   32.50    7.10
 -16  -5   0   38.00    7.30
 -16  -5   0   17.50    4.40
 -16   5   0   23.00    6.10
  16  -5   0   21.50    6.70
  16   5   0   10.80    4.60
  17  -5   0    4.00    4.30
 -17   5   0   -5.30    4.00
 -17  -5   0    2.40    3.10
  17  -5   0   10.40    5.30
 -17  -5   0    6.00    4.00
 -17   5   0   -3.70    3.00
 -17   5   0   -0.60    2.70
  17   5   0    2.40    3.80
  18  -5   0    5.00    5.50
  18  -5   0    6.80    4.60
 -18   5   0    8.10    4.00
 -18   5   0    7.10    4.50
 -18  -5   0   14.10    5.40
  18   5   0    1.30    4.50
 -18  -5   0    1.10    2.80
 -18   5   0    0.60    4.80
 -19   5   0   -3.70    2.60
 -19   5   0   -1.70    3.40
 -19  -5   0   -9.50    3.80
 -19  -5   0   -0.20    3.10
  19   5   0    6.60    4.50
  19  -5   0   -0.10    3.50
  19  -5   0   11.40    5.40
 -19  -5   0    3.90    4.60
 -19   5   0   -4.20    4.60
  20  -5   0   80.19   12.40
 -20  -5   0  109.89   13.70
 -20   5   0   72.89   13.80
 -20  -5   0   93.69   10.40
 -20   5   0   88.79   10.00
 -20   5   0   84.39   12.00
  20   5   0   74.59   10.80
  20  -5   0   80.79   11.40
 -21   5   0  -11.10    5.00
 -21   5   0    3.20    3.50
  21  -5   0   -3.60    4.30
 -21  -5   0   -0.80    4.40
  21   5   0    0.20    4.30
  21   5   0    5.50    5.40
 -22   5   0   13.80    6.70
 -22   5   0   21.70    5.50
 -22   5   0   21.20    9.90
 -22  -5   0    9.70    6.40
  22   5   0    9.90    5.50
  22  -5   0   19.40    7.80
  22   5   0   10.70    7.30
 -23   5   0   -4.70    5.60
  23  -5   0    1.50    5.40
 -23   5   0    0.90    5.00
  23   5   0    9.40    7.10
  23   5   0   -5.40    4.30
 -23   5   0   -0.90    3.60
  23  -5   0   -9.40    5.00
 -23  -5   0   10.60    6.40
 -24  -5   0   33.80    8.60
 -24   5   0   18.50    7.60
  24  -5   0   -2.20    4.60
  24  -5   0   12.90    7.80
 -24   5   0   14.50    5.40
  24   5   0   -1.80    7.40
 -24   5   0   14.00    8.40
  24   5   0    6.10    6.70
 -25  -5   0   -1.00    4.30
  25  -5   0    8.60    6.30
  25  -5   0    6.60    7.20
 -25   5   0    2.00    6.70
  25   5   0    8.60    7.50
 -25   5   0   -9.30    4.40
 -25  -5   0   -0.20    5.20
  25   5   0   -3.80    4.60
 -25   5   0   -1.00    3.80
   0   6   0  968.20   35.90
   0  -6   0  984.30   36.60
   0   6   0  930.21   35.90
   0   6   0  952.50   36.50
  -1  -6   0    0.30    1.00
  -1  -6   0    0.70    1.20
   1   6   0   -0.20    1.30
   1  -6   0   -0.50    1.10
  -1   6   0    0.70    1.30
   1   6   0   -0.60    0.90
   1   6   0   -1.80    0.60
  -2   6   0 1058.69   40.60
   2   6   0 1084.19   40.10
   2   6   0 1090.49   41.00
  -2  -6   0 1061.29   40.00
  -2  -6   0 1099.19   41.00
   2   6   0 1045.60   39.80
   3   6   0   -0.10    1.00
  -3   6   0    0.10    1.20
  -3  -6   0   -1.10    0.90
   3   6   0    1.90    1.30
   3   6   0    1.00    1.50
  -3  -6   0   -0.20    1.30
  -4  -6   0    7.30    2.70
  -4  -6   0    4.60    1.50
   4   6   0    8.60    2.40
  -4  -6   0    5.70    2.00
   4   6   0    8.40    1.80
  -5  -6   0   -4.10    1.10
  -5  -6   0   -1.60    1.20
  -5  -6   0   -0.90    1.70
   5   6   0   -1.70    1.20
  -5   6   0   -2.20    1.40
   5   6   0   -2.10    1.00
  -6  -6   0   90.19    5.90
  -6  -6   0   86.19    7.60
  -6  -6   0   99.39    6.60
  -6  -6   0   89.39    6.50
   6   6   0  101.39    6.90
  -6   6   0  108.79    7.00
   6   6   0   85.69    5.90
  -6   6   0  102.19    6.30
  -7   6   0   -0.30    1.70
  -7  -6   0   -4.60    1.50
  -7  -6   0   -2.10    1.50
  -7  -6   0    1.10    1.50
  -7  -6   0    0.10    1.50
  -7   6   0    1.30    1.40
  -7   6   0   -0.90    1.60
   7   6   0   -0.80    1.30
   7   6   0    1.30    1.80
  -8  -6   0  688.83   26.90
   8   6   0  686.83   28.50
  -8   6   0  624.94   28.00
  -8  -6   0  648.34   29.90
  -8   6   0  622.04   26.50
   8   6   0  659.33   27.20
  -8   6   0  633.14   28.50
  -8  -6   0  645.74   28.20
  -9  -6   0   -0.30    1.60
  -9   6   0   -0.80    2.30
  -9   6   0    0.90    2.10
   9  -6   0    3.40    2.50
  -9  -6   0   -2.10    2.00
  -9   6   0   -0.30    1.50
  -9  -6   0   -1.10    1.50
   9   6   0   -1.80    1.70
 -10   6   0   11.00    2.90
 -10  -6   0    2.70    2.70
 -10   6   0    9.20    3.10
 -10  -6   0    7.30    2.70
 -10   6   0    9.00    3.80
  10  -6   0    5.80    3.40
  10   6   0    8.30    3.00
 -10  -6   0    5.80    3.50
  11   6   0   -0.40    2.10
 -11  -6   0    0.70    2.60
 -11  -6   0   -0.90    1.70
 -11   6   0   -2.20    1.70
 -11   6   0    4.80    3.10
 -11   6   0    0.90    2.30
 -11  -6   0   -0.10    2.40
 -12   6   0  216.48   15.20
 -12  -6   0  240.38   14.40
  12  -6   0  217.78   14.30
 -12   6   0  219.28   14.00
 -12  -6   0  233.18   13.00
 -12  -6   0  238.28   16.30
  12   6   0  238.58   13.70
 -12   6   0  241.88   12.60
 -13  -6   0    2.00    2.50
  13  -6   0    1.10    3.30
 -13  -6   0    4.70    2.80
 -13  -6   0   -0.50    3.30
 -13   6   0   -4.80    1.60
  13   6   0   -1.20    2.30
 -13   6   0    9.30    3.90
 -13   6   0    0.10    2.10
 -14   6   0  131.79    9.00
 -14   6   0  107.59   13.00
  14  -6   0  109.89   10.60
 -14  -6   0  117.29   11.70
 -14  -6   0  131.39   10.80
 -14   6   0  126.19   10.40
  14   6   0  113.69    9.70
 -15   6   0   -2.20    2.00
 -15  -6   0    6.70    4.10
  15  -6   0   -2.90    3.10
 -15   6   0    4.70    4.30
 -15  -6   0    1.50    2.90
  15   6   0    3.60    3.80
 -15   6   0   -0.40    2.50
  16   6   0    9.90    4.50
 -16   6   0    9.90    4.20
 -16  -6   0   11.00    4.50
  16  -6   0    1.30    4.20
 -16  -6   0    2.10    4.60
 -16   6   0   12.40    3.80
 -16   6   0   19.50    6.70
 -17   6   0   -1.00    4.60
 -17   6   0   -5.10    2.30
  17   6   0    5.10    4.20
 -17  -6   0    3.50    3.90
 -17   6   0   -0.70    2.40
 -18   6   0   35.30    6.30
 -18   6   0   37.00    9.10
  18  -6   0   25.00    6.30
  18  -6   0   19.00    7.70
 -18  -6   0   43.60    8.30
 -18  -6   0   21.40    7.50
 -18   6   0   29.80    7.00
  18   6   0   44.00    8.40
  19  -6   0   -6.80    3.10
 -19   6   0    2.70    3.20
 -19   6   0    1.40    3.60
 -19   6   0    4.40    6.10
  19  -6   0    8.40    4.80
  19   6   0    3.00    4.50
 -19  -6   0    7.20    4.10
  20   6   0   45.50    8.60
 -20   6   0   40.60    7.00
 -20   6   0   53.19    9.90
  20  -6   0   52.59   10.30
  20  -6   0   33.70    7.50
 -20  -6   0   43.30    8.90
 -20   6   0   53.89   12.10
  21  -6   0    0.40    4.00
 -21  -6   0    0.30    4.20
 -21   6   0   -8.60    4.00
 -21   6   0    2.30    3.80
  21   6   0    2.50    4.70
 -21  -6   0    1.00    3.80
  21  -6   0   -2.30    4.00
 -21   6   0    7.30    5.20
  22  -6   0   34.40    9.00
 -22   6   0   27.10    8.70
  22   6   0   44.00   10.80
 -22   6   0   56.89   12.60
 -22  -6   0   44.40    8.60
 -22   6   0   58.19    8.70
  22   6   0   69.79   11.20
  22  -6   0   46.20    9.60
 -22  -6   0   47.00   10.70
  23  -6   0    2.60    5.50
 -23  -6   0   -6.90    4.50
  23   6   0   -8.50    5.50
 -23   6   0    4.10    4.20
  23  -6   0    0.70    5.90
 -23   6   0   -6.40    4.30
  23   6   0   -3.30    4.40
 -23  -6   0   11.00    5.60
 -23   6   0  -10.90    4.30
  24   6   0   37.90    9.60
 -24  -6   0   41.90    8.70
  24   6   0   31.30   10.10
 -24  -6   0   44.30   11.10
 -24   6   0   46.90   10.20
 -24   6   0   20.20    9.00
  24  -6   0   13.60    8.10
  24  -6   0   38.80   10.30
 -24   6   0   50.19    8.40
  25  -6   0    6.40    6.70
 -25   6   0   -9.10    3.80
  25  -6   0  -12.80    4.60
 -25   6   0   -6.40    3.60
 -25  -6   0    2.30    5.20
 -25  -6   0    8.20    6.30
  25   6   0   11.20    8.30
 -25   6   0   -7.60    6.90
  25   6   0    1.50    5.00
   0   7   0   14.10    2.30
   1   7   0    0.30    0.90
   1   7   0    0.60    1.40
   1   7   0    1.00    1.10
  -1   7   0    1.50    1.40
  -1   7   0    1.30    1.30
   1  -7   0    0.30    1.20
  -1  -7   0    1.30    1.40
   2   7   0    8.30    2.10
   2   7   0    8.90    1.80
  -2  -7   0    7.30    1.60
   2   7   0    6.40    1.50
  -2  -7   0    7.40    2.00
  -2   7   0    5.40    1.90
  -3  -7   0    1.00    1.50
  -3  -7   0   -0.40    1.00
   3   7   0    0.50    1.00
  -3   7   0   -0.20    1.10
   3   7   0   -2.70    0.80
   3   7   0    0.80    1.30
  -4  -7   0  245.58   13.00
  -4  -7   0  229.98   11.60
   4   7   0  245.98   12.00
  -4  -7   0  213.08   10.60
  -4  -7   0  231.78   13.50
   4   7   0  239.68   10.70
  -5   7   0    3.00    1.70
  -5  -7   0   -1.20    1.10
  -5  -7   0    3.80    2.40
  -5  -7   0   -1.30    1.30
   5   7   0   -3.30    0.90
   5   7   0   -0.90    1.30
  -5  -7   0    0.40    1.50
   6   7   0   24.20    3.70
  -6  -7   0   22.80    3.90
  -6  -7   0   24.80    3.30
  -6  -7   0   28.50    4.20
  -6  -7   0   27.50    5.10
  -6  -7   0   27.90    3.70
   6   7   0   24.00    3.90
  -6   7   0   31.60    4.40
   6   7   0   28.70    3.60
  -7  -7   0    4.90    2.30
  -7  -7   0    3.50    1.90
  -7  -7   0    3.30    2.40
  -7   7   0    3.40    2.20
  -7   7   0    9.70    2.90
   7   7   0    4.70    1.90
  -7  -7   0    3.30    2.10
  -7  -7   0    0.20    1.70
   7   7   0    1.40    2.10
  -7   7   0    3.80    2.10
   7   7   0    5.40    2.20
  -8   7   0  241.48   13.50
  -8  -7   0  283.37   13.80
  -8   7   0  247.38   13.80
   8   7   0  245.08   12.50
  -8   7   0  248.58   12.50
   8  -7   0  247.18   14.70
  -8  -7   0  229.58   13.20
  -8  -7   0  248.88   15.20
  -8  -7   0  260.57   12.40
   8   7   0  238.58   12.70
  -9   7   0    3.20    2.40
  -9   7   0   -0.20    1.70
  -9  -7   0   -2.40    1.80
  -9  -7   0    0.70    1.70
  -9   7   0   -5.40    1.90
   9   7   0   -0.70    2.00
   9  -7   0   -1.10    1.80
  -9  -7   0   -2.30    1.40
  10   7   0    7.60    2.90
 -10  -7   0    4.30    3.20
  10  -7   0   12.30    3.60
 -10   7   0    3.10    2.70
 -10   7   0    6.10    2.40
 -10  -7   0    1.50    2.50
 -10  -7   0    4.00    2.20
 -10   7   0    9.40    3.30
 -11   7   0    3.10    2.50
 -11  -7   0    1.80    2.50
 -11   7   0   -3.20    2.60
 -11   7   0    0.80    1.90
 -11  -7   0   -2.70    1.60
 -11  -7   0   -1.60    1.80
  11  -7   0    1.10    2.70
  11   7   0   -1.50    2.30
 -12   7   0   59.79    7.90
 -12  -7   0   57.89    6.80
 -12  -7   0   54.79    7.60
 -12   7   0   64.19    9.20
 -12  -7   0   54.79    9.20
 -12   7   0   52.99    6.10
  12   7   0   60.69    7.50
  12  -7   0   69.39    8.70
 -13   7   0   -3.70    1.50
 -13   7   0    1.40    2.50
 -13   7   0   -2.80    2.60
 -13  -7   0    3.50    3.10
  13  -7   0    1.50    2.90
 -13  -7   0   -2.80    2.20
  13   7   0   -3.00    1.70
 -13  -7   0    8.70    4.40
  14  -7   0   64.99    9.10
 -14   7   0   81.09    8.60
 -14  -7   0  108.39    9.90
 -14   7   0   88.09    7.40
 -14  -7   0  102.59   11.10
 -14  -7   0   86.09    9.10
 -14   7   0  100.79   12.20
  14   7   0   95.49   10.20
 -15  -7   0   -5.00    2.20
 -15  -7   0    1.10    3.00
 -15   7   0    1.10    2.90
 -15   7   0   -0.90    2.20
  15   7   0   -0.90    2.60
 -15  -7   0    5.90    3.70
 -15   7   0   -1.80    3.70
 -16   7   0   39.50    7.50
 -16  -7   0   42.20    7.90
  16   7   0   43.30    7.70
 -16   7   0   47.90    9.20
 -16  -7   0   29.40    5.90
 -16   7   0   36.70    6.00
 -16  -7   0   49.50    9.10
  16  -7   0   23.00    6.70
 -17   7   0   -0.20    2.70
 -17   7   0    2.70    3.70
 -17  -7   0   -1.90    2.50
 -17  -7   0   -3.30    3.40
 -17   7   0   -0.20    5.50
  17   7   0   -6.00    2.90
 -18   7   0   73.89   10.90
 -18   7   0   63.79   12.20
  18   7   0   65.89    9.60
 -18  -7   0   87.69   12.10
 -18  -7   0   80.39    9.80
  18  -7   0   60.19   10.20
 -18   7   0   79.19    9.00
 -19   7   0    7.10    5.70
  19   7   0   -2.70    3.00
 -19  -7   0    7.70    5.10
 -19   7   0    1.20    2.90
 -19  -7   0   -4.10    2.70
 -20  -7   0   -1.40    3.70
 -20   7   0   -0.80    2.70
  20   7   0    0.80    4.50
 -20  -7   0   -1.10    3.40
 -20   7   0    6.20    6.80
  20  -7   0    4.20    4.60
  20  -7   0  -12.20    3.90
 -20   7   0   -0.10    3.60
 -21   7   0   -3.40    3.00
 -21  -7   0   -4.40    3.10
 -21  -7   0   -0.20    5.00
 -21   7   0    8.80    4.70
 -21   7   0   -0.60    4.80
  21  -7   0   -0.70    4.10
  21   7   0    2.50    4.10
  21  -7   0  -11.90    3.30
 -22   7   0   27.00    6.30
  22   7   0   22.80    7.60
  22  -7   0   25.50    7.70
  22  -7   0   26.40    8.20
 -22   7   0   21.20    9.10
 -22  -7   0   29.10    7.00
 -22  -7   0   30.60    8.30
 -22   7   0   43.90   10.10
  23  -7   0    0.50    6.00
 -23  -7   0   -0.10    3.30
 -23  -7   0   -3.70    4.80
  23   7   0   -4.90    4.20
 -23   7   0  -13.20    3.60
 -23   7   0    9.40    7.80
  23  -7   0   -0.10    6.00
  23   7   0    1.20    5.70
 -23   7   0   -1.90    3.60
  24   7   0   17.10    7.00
 -24  -7   0    4.90    5.50
 -24   7   0   22.60    5.90
 -24   7   0   28.70   10.20
  24  -7   0   11.20    6.60
  24   7   0   -1.10    7.60
 -24  -7   0    9.10    6.80
 -24   7   0    8.00    6.20
  24  -7   0    6.80    6.50
 -25   7   0   -3.80    3.40
  25   7   0    5.10    6.00
  25  -7   0   -5.10    4.90
  25  -7   0    3.40    5.80
 -25  -7   0   -1.10    4.20
 -25   7   0   -7.30    3.60
  25   7   0   -4.00    7.20
 -25   7   0   -2.80    7.10
 -25  -7   0    5.60    6.30
   0   8   0  831.52   33.00
   0  -8   0  829.82   33.80
   0   8   0  864.31   33.10
   0   8   0  876.21   34.00
   0   8   0  912.51   33.80
   1   8   0    0.20    1.30
  -1   8   0   -1.10    1.20
  -1  -8   0   -0.10    1.40
  -1   8   0   -1.50    1.20
   1   8   0   -1.80    0.80
   1   8   0    2.00    1.30
   1  -8   0    0.50    1.30
  -1   8   0    0.90    1.40
  -2  -8   0   83.39    6.10
   2   8   0  101.69    5.50
   2   8   0   96.89    5.70
  -2  -8   0   99.69    5.70
   2  -8   0  106.79    7.30
  -2  -8   0   96.89    6.50
   2   8   0  100.49    6.50
  -2   8   0   96.19    6.20
   2  -8   0   95.49    6.20
   3   8   0    2.60    1.60
  -3   8   0    0.50    1.60
  -3  -8   0    0.20    1.40
  -3  -8   0    3.10    1.40
   3   8   0   -0.60    1.10
  -3   8   0   -0.10    1.20
   3   8   0    0.90    1.10
  -3  -8   0   -2.10    0.90
   3  -8   0   -0.20    1.20
  -4   8   0  280.97   12.70
  -4  -8   0  266.87   12.10
  -4   8   0  254.37   12.70
  -4  -8   0  270.07   13.20
   4   8   0  280.07   13.60
   4   8   0  263.17   12.20
  -4  -8   0  256.27   13.10
   4  -8   0  260.87   12.90
   4   8   0  262.97   12.00
  -4  -8   0  278.97   15.50
  -5  -8   0    0.90    1.80
  -5  -8   0   -0.20    1.40
  -5   8   0    0.60    1.50
   5   8   0    1.30    1.80
  -5  -8   0    0.40    1.60
  -5  -8   0    0.90    2.30
  -5  -8   0    1.20    1.50
   5   8   0    1.40    1.70
   5   8   0    1.60    1.30
  -6  -8   0  281.47   14.60
  -6  -8   0  282.17   14.50
   6   8   0  283.27   13.60
   6   8   0  292.17   13.50
  -6  -8   0  292.77   13.60
  -6  -8   0  284.57   16.50
   6   8   0  303.87   15.10
   6   8   0  334.77   14.50
  -6  -8   0  293.67   13.50
  -6   8   0  285.17   14.20
   7   8   0    3.30    2.00
   7   8   0    0.00    1.60
  -7   8   0    0.20    1.50
  -7  -8   0   -0.10    1.40
  -7  -8   0   -0.40    1.50
   7   8   0   -0.60    1.90
  -7  -8   0   -3.90    2.00
  -7  -8   0    2.40    2.00
  -7  -8   0    0.80    2.00
  -7   8   0    0.60    2.20
   8   8   0  142.89    8.90
  -8  -8   0  159.58   11.70
  -8   8   0  169.98   10.30
  -8  -8   0  148.79    8.90
  -8   8   0  160.18   10.60
  -8   8   0  150.78    9.10
  -8  -8   0  150.28   10.00
   8  -8   0  147.79    9.60
  -8  -8   0  166.88    9.10
  -8  -8   0  146.39    9.70
   8   8   0  152.78    9.20
   9   8   0   -2.00    1.80
  -9  -8   0   -0.20    1.80
   9   8   0    0.30    1.80
  -9  -8   0    1.40    2.90
  -9  -8   0    2.60    2.30
  -9  -8   0   -0.30    1.50
  -9   8   0   -1.00    1.60
  -9   8   0    3.10    2.60
   9  -8   0    0.20    2.40
  -9  -8   0    0.00    1.30
  10   8   0   -0.30    2.00
  10  -8   0    0.00    2.50
 -10  -8   0   -3.00    1.80
 -10  -8   0    1.60    3.00
 -10  -8   0   -2.70    1.80
 -10   8   0    1.00    2.60
 -10   8   0   -1.80    1.70
 -10   8   0   -2.80    1.90
 -11   8   0   -3.50    2.60
 -11  -8   0   -1.30    1.80
  11   8   0    0.80    2.40
 -11   8   0    2.40    2.40
  11  -8   0   -0.90    2.40
 -11  -8   0    2.30    2.70
 -11  -8   0   -0.40    2.00
 -11   8   0    1.90    2.10
 -12  -8   0    9.60    4.80
 -12   8   0    8.80    3.50
 -12   8   0    5.10    2.70
 -12   8   0    9.00    4.20
  12  -8   0    3.40    3.50
  12   8   0   10.30    3.70
 -12  -8   0    6.30    3.20
  13  -8   0   -1.40    3.10
 -13   8   0    4.00    2.60
 -13  -8   0    4.10    3.40
 -13   8   0    2.70    2.80
 -13  -8   0    0.40    2.50
 -13  -8   0    0.70    2.80
 -13   8   0   -0.40    3.40
  13   8   0   -5.90    1.70
  14   8   0   22.90    5.40
 -14   8   0   22.30    5.90
 -14   8   0   16.30    4.10
 -14  -8   0   18.00    5.50
 -14  -8   0   17.00    4.60
  14  -8   0   20.10    5.50
 -14  -8   0   31.90    7.00
 -14   8   0   17.10    4.90
 -15  -8   0    3.00    3.40
 -15   8   0    0.40    3.50
 -15   8   0   -3.30    2.50
 -15  -8   0   -1.90    2.70
 -15   8   0    1.80    2.70
 -15  -8   0    3.30    3.40
  15  -8   0    5.40    3.90
  15   8   0    2.90    3.50
 -16  -8   0   54.19    9.80
 -16  -8   0   30.30    6.90
  16  -8   0   35.30    7.40
  16   8   0   36.30    7.00
 -16   8   0   31.50    5.60
 -16   8   0   34.30    7.60
 -16   8   0   29.00    8.20
 -16  -8   0   45.50    7.10
 -17  -8   0    6.60    4.00
  17   8   0    5.20    3.80
 -17  -8   0    1.90    3.60
 -17   8   0   -3.60    4.10
  17  -8   0    0.40    4.10
 -17   8   0    0.00    3.30
 -17   8   0    0.90    3.00
  18  -8   0   37.30    8.40
 -18  -8   0   51.69    9.90
 -18   8   0   38.30    6.50
 -18   8   0   47.70    8.90
 -18   8   0   46.00    9.90
  18   8   0   27.60    6.70
 -18  -8   0   26.50    6.20
 -19  -8   0    4.80    3.80
 -19  -8   0    3.50    4.80
 -19   8   0    2.50    5.20
 -19   8   0    2.10    3.80
  19   8   0   -3.20    3.50
  19  -8   0   -4.20    4.00
  20  -8   0   20.50    7.10
  20   8   0   12.30    5.60
 -20  -8   0   12.20    5.20
 -20  -8   0    9.20    8.00
 -20   8   0   13.40    6.90
 -20   8   0   17.70    8.20
 -20   8   0   16.10    5.00
 -20  -8   0   26.10    7.70
  21  -8   0    4.40    5.20
 -21   8   0   -4.00    2.70
  21  -8   0    1.40    5.00
 -21   8   0    2.00    4.10
  21   8   0    3.40    4.60
 -21  -8   0   -2.70    4.40
 -21   8   0    6.80    6.20
 -21  -8   0    5.80    4.60
 -22   8   0   12.90    5.70
  22  -8   0   -0.20    4.70
 -22   8   0    3.60    4.10
  22   8   0    5.50    5.70
 -22   8   0    9.40    7.00
  22  -8   0   -0.10    4.20
 -22  -8   0    6.70    5.80
 -22  -8   0   -0.60    3.30
 -23   8   0    0.30    3.40
 -23   8   0   11.30    5.80
 -23  -8   0   -2.20    4.30
  23  -8   0   -3.10    4.70
 -23   8   0   -4.10    5.40
  23  -8   0    1.70    4.80
  23   8   0   -1.30    4.40
 -23  -8   0   -1.30    3.90
 -24   8   0   65.79   14.70
  24   8   0   69.49   12.30
 -24  -8   0   67.29   10.30
  24   8   0   31.50   11.10
 -24   8   0   43.10   10.90
  24  -8   0   61.39   11.00
 -24  -8   0   75.59   13.30
 -24   8   0   79.79   10.60
  24  -8   0   63.49   12.30
 -25  -8   0    3.30    4.80
 -25   8   0   -2.30    7.70
 -25  -8   0   -2.50    5.20
  25   8   0   -4.60    5.00
  25  -8   0   -3.90    4.40
 -25   8   0   -0.40    3.80
  25  -8   0    5.60    7.20
  25   8   0  -11.70    4.40
 -25   8   0    2.90    5.60
   0  -9   0    0.30    1.50
   0   9   0    0.50    1.10
   0   9   0    0.00    1.10
   0  -9   0    0.90    1.40
   0   9   0    3.50    1.80
   0   9   0    1.60    1.60
  -1   9   0   -0.30    1.20
  -1  -9   0    3.70    1.80
   1   9   0   -0.60    1.20
   1  -9   0   -0.20    1.40
   1   9   0   -1.00    1.30
   1   9   0   -0.30    0.90
  -1   9   0   -1.30    1.10
  -1   9   0    0.10    1.40
   1  -9   0   -0.30    1.40
  -1  -9   0   -0.20    1.30
  -2  -9   0  285.47   13.60
   2  -9   0  294.77   12.80
   2   9   0  277.97   13.50
  -2  -9   0  263.87   13.20
   2   9   0  259.97   12.30
  -2  -9   0  270.17   12.40
   2  -9   0  282.37   13.50
   2   9   0  275.57   12.20
   2  -9   0  265.97   13.00
  -2   9   0  274.37   13.30
  -2   9   0  280.17   12.70
  -3  -9   0    0.10    1.20
   3   9   0    0.40    1.30
   3   9   0    1.50    1.30
   3   9   0   -0.70    1.40
  -3   9   0   -1.80    1.10
  -3  -9   0    2.00    1.60
  -3   9   0    0.70    1.50
  -3  -9   0    0.40    1.50
  -3  -9   0   -0.30    1.40
   3  -9   0   -0.10    1.30
  -4   9   0  933.51   35.70
   4   9   0  897.81   34.70
  -4  -9   0  870.51   34.60
  -4  -9   0  842.32   34.40
   4   9   0  888.31   34.90
   4  -9   0  945.11   35.90
   4   9   0  864.31   34.30
  -4   9   0  913.91   35.00
  -4   9   0  889.81   34.50
  -4  -9   0  865.41   35.90
   4   9   0  840.82   35.90
  -4  -9   0  878.61   35.80
  -5  -9   0    4.50    2.60
  -5  -9   0    1.00    1.50
   5   9   0    0.60    2.10
  -5   9   0    0.80    1.70
  -5  -9   0    0.00    1.60
   5   9   0    1.30    1.70
   5   9   0   -0.80    1.20
  -5  -9   0   -1.00    1.30
  -5  -9   0    0.00    1.70
   5  -9   0   -0.80    1.60
   5   9   0    2.00    1.80
  -5   9   0    3.10    1.50
   6   9   0   23.60    3.50
  -6  -9   0   21.60    4.00
   6   9   0   21.90    3.40
  -6   9   0   18.80    3.50
  -6  -9   0   20.40    3.90
  -6  -9   0   25.00    5.30
   6  -9   0   28.60    6.40
  -6  -9   0   19.80    3.40
   6   9   0   19.20    3.70
  -6  -9   0   21.40    3.30
   7   9   0   -0.70    1.50
  -7  -9   0   -0.60    2.00
   7   9   0   -0.40    1.80
  -7  -9   0   -1.10    1.50
  -7  -9   0   -0.90    1.40
  -7   9   0    1.80    2.00
  -7  -9   0    1.40    1.70
   7  -9   0   -0.50    1.90
   7   9   0    6.60    2.20
  -7  -9   0    3.30    2.70
  -8   9   0    2.80    2.30
   8  -9   0    7.20    2.70
  -8  -9   0    5.60    2.10
  -8  -9   0    4.30    2.60
  -8  -9   0    1.20    1.80
  -8  -9   0    3.40    2.30
   8   9   0    4.00    2.60
   8   9   0    4.10    2.20
  -8   9   0    7.40    2.90
   8   9   0    3.00    2.10
   9   9   0   -2.20    1.50
   9  -9   0    0.10    2.10
  -9  -9   0   -3.00    1.40
  -9  -9   0   -3.50    1.20
  -9  -9   0    0.40    1.70
  -9   9   0    3.00    2.10
  -9  -9   0    3.60    2.70
   9   9   0    1.40    2.00
   9   9   0   -0.90    2.00
  -9  -9   0    0.00    2.00
  -9   9   0   -1.90    1.80
  -9   9   0   -3.70    1.80
 -10  -9   0    8.60    3.00
 -10   9   0   14.00    3.60
 -10  -9   0   18.20    5.50
 -10  -9   0   13.60    3.80
  10  -9   0   11.80    4.00
 -10   9   0   12.30    3.80
 -10   9   0   10.90    4.00
  10   9   0    7.60    3.20
 -10  -9   0    8.40    3.20
  11  -9   0   -2.50    2.30
 -11   9   0    1.10    2.50
 -11   9   0   -0.80    1.90
 -11  -9   0   -0.40    3.00
  11   9   0    3.40    2.80
 -11  -9   0    4.50    2.30
 -11  -9   0   -2.40    2.50
 -11  -9   0    0.70    2.50
 -11   9   0   -1.10    2.30
 -12   9   0   39.40    6.70
 -12   9   0   33.30    6.10
  12  -9   0   44.70    7.00
  12   9   0   31.60    5.40
 -12  -9   0   33.20    5.20
 -12  -9   0   36.20    6.30
 -12   9   0   33.50    5.10
 -12  -9   0   46.30    8.30
 -13   9   0   -1.90    2.50
 -13   9   0   -3.20    2.40
 -13  -9   0   -1.20    2.80
  13   9   0   -3.30    2.40
 -13   9   0    9.40    4.10
 -13  -9   0   -0.20    3.20
  13  -9   0   -2.30    2.60
 -13  -9   0   -3.30    1.80
  14  -9   0   12.40    4.30
  14   9   0   11.10    4.10
 -14   9   0   10.30    3.50
 -14   9   0   12.50    4.50
 -14  -9   0    5.20    3.60
 -14   9   0   13.70    5.20
 -14  -9   0   14.90    6.20
 -14  -9   0    6.50    3.40
  15   9   0   -2.00    3.20
 -15   9   0    0.10    2.40
  15  -9   0    1.00    4.20
 -15  -9   0   -4.10    2.20
 -15   9   0   -1.30    3.50
 -15  -9   0    1.50    3.10
 -15   9   0   -1.00    2.60
 -16  -9   0   23.60    6.80
 -16   9   0   16.30    6.40
  16  -9   0    0.90    4.20
 -16  -9   0    6.90    5.00
 -16   9   0   12.70    4.10
 -16  -9   0    8.90    4.20
  16   9   0    8.80    4.40
 -16   9   0   12.10    5.20
 -17  -9   0    3.10    3.30
 -17   9   0  -11.30    4.00
 -17   9   0    1.50    2.90
 -17  -9   0   -4.40    3.20
 -17   9   0    3.90    3.60
  17   9   0    2.20    3.80
  17  -9   0   -9.20    3.10
  18  -9   0  144.79   13.80
 -18   9   0  151.88   11.60
 -18  -9   0  146.99   12.10
  18   9   0  166.38   13.40
 -18   9   0  161.58   14.10
 -18  -9   0  172.18   15.40
 -18   9   0  144.39   16.90
 -18  -9   0  163.08   14.70
 -19   9   0   -1.30    3.00
  19   9   0    0.00    4.20
 -19  -9   0  -10.30    3.00
 -19  -9   0    2.90    3.80
  19  -9   0  -10.50    3.00
 -19   9   0   -5.70    4.80
 -19   9   0    1.80    3.30
 -20  -9   0    1.70    3.80
 -20   9   0    5.30    3.90
 -20   9   0   -6.10    2.90
  20   9   0    6.40    4.90
  20  -9   0    1.20    4.50
 -20   9   0   -0.50    4.80
 -20  -9   0  -10.90    3.30
 -21   9   0   -2.50    3.80
  21  -9   0   -9.30    3.10
 -21  -9   0  -12.70    3.50
  21  -9   0   -7.80    3.30
 -21   9   0    0.10    3.20
  21   9   0    1.80    4.50
 -21  -9   0   -3.40    3.10
 -21   9   0   -5.80    4.20
  22  -9   0   35.10    9.20
  22  -9   0   35.30    9.10
 -22  -9   0   38.20    8.20
 -22  -9   0   21.90    8.10
  22   9   0   41.10    9.10
 -22   9   0   35.80    7.10
 -22   9   0   40.70   11.00
 -22   9   0   58.99   11.00
 -23   9   0   15.10    5.90
 -23   9   0   -1.90    5.90
  23  -9   0    3.30    5.60
  23   9   0    1.60    4.50
 -23   9   0    1.00    3.90
  23  -9   0    2.90    5.80
 -23  -9   0    7.80    4.90
 -23  -9   0   -8.90    3.50
 -24  -9   0   26.80    8.60
 -24   9   0   45.60   10.40
 -24   9   0   31.70   10.30
 -24  -9   0   39.30    8.50
  24  -9   0   37.80    9.60
 -24   9   0   31.00    7.40
  24   9   0   29.60    8.80
  24  -9   0   30.40    9.50
 -25  -9   0   -1.10    3.70
  25  -9   0   -4.90    5.00
  25   9   0   -3.00    5.00
   0 -10   0   53.79    4.40
   0 -10   0   60.39    5.20
   0 -10   0   47.90    4.70
   0  10   0   52.89    4.30
   0  10   0   52.19    4.90
   0  10   0   49.60    4.20
   0  10   0   59.69    6.10
   1 -10   0    0.20    1.50
   1  10   0    0.70    1.50
   1  10   0    1.70    1.20
  -1 -10   0    0.60    1.60
   1  10   0    3.00    1.70
  -1  10   0    1.60    1.80
   1 -10   0    0.00    1.50
  -1  10   0    0.80    1.50
  -1 -10   0    1.70    1.90
   1  10   0    0.80    1.70
   1 -10   0    0.00    1.60
  -1  10   0    0.10    1.80
  -1  10   0    0.10    1.40
  -1 -10   0    2.90    2.00
  -2  10   0  184.78    9.50
  -2 -10   0  168.18   10.00
  -2  10   0  172.58    8.90
  -2 -10   0  180.18   10.20
   2 -10   0  188.58   10.30
   2  10   0  180.48    9.30
  -2  10   0  157.68    9.60
  -2  10   0  157.58    9.40
   2 -10   0  174.78    9.20
  -2 -10   0  183.88    9.30
   2  10   0  170.08   10.00
   2 -10   0  176.28    9.80
   2  10   0  186.08    9.20
   2  10   0  191.38    9.00
  -3 -10   0    2.60    2.70
  -3 -10   0   -1.00    1.10
   3  10   0   -1.70    0.90
   3  10   0   -0.50    1.60
  -3 -10   0   -0.40    1.50
   3  10   0    0.10    1.50
   3 -10   0    1.30    1.70
  -3 -10   0   -1.70    1.40
   3  10   0    1.90    1.90
  -3 -10   0   -0.10    1.60
   3  10   0   -2.00    1.20
  -3  10   0    1.30    2.20
  -3  10   0   -0.10    1.50
  -3  10   0   -1.80    1.50
   4  10   0   73.89    5.40
  -4 -10   0   67.89    6.00
   4  10   0   74.09    5.20
   4  10   0   74.49    5.60
  -4 -10   0   74.49    5.40
  -4  10   0   80.49    5.20
   4  10   0   75.89    5.50
  -4 -10   0   78.69    6.40
  -4 -10   0   67.99    5.30
  -4  10   0   71.29    5.50
  -4 -10   0   77.49    7.10
   4 -10   0   68.09    5.90
   5 -10   0    1.60    1.80
  -5 -10   0    3.40    2.20
  -5  10   0   -1.60    1.30
   5 -10   0    0.50    1.90
  -5 -10   0    1.80    1.90
  -5 -10   0    0.00    2.40
  -5 -10   0   -1.10    1.40
   5  10   0    1.80    1.60
  -5  10   0    2.60    1.70
   5  10   0    1.30    1.70
  -5 -10   0   -0.20    1.40
   5  10   0   -1.60    1.30
   5  10   0    3.70    2.10
   6 -10   0  991.70   39.70
   6  10   0  985.10   37.60
   6  10   0  944.31   37.60
  -6  10   0  948.41   38.30
  -6 -10   0  947.11   39.20
  -6 -10   0  928.21   37.60
   6  10   0  991.20   38.50
  -6 -10   0  981.90   37.70
  -6 -10   0  943.31   42.20
   6 -10   0  935.01   38.70
  -6 -10   0  903.51   39.00
   6 -10   0  955.30   38.90
   6 -10   0  950.20   41.90
  -7 -10   0    1.30    1.70
   7 -10   0   -0.60    1.80
  -7 -10   0    4.60    3.10
   7  10   0   -1.60    1.50
  -7 -10   0    0.40    2.00
   7  10   0   -0.40    2.00
  -7 -10   0    0.40    1.70
  -7 -10   0   -2.90    1.50
  -7  10   0   -1.20    1.60
   7  10   0    2.30    1.80
   8 -10   0  702.03   30.10
  -8 -10   0  701.13   34.00
   8  10   0  699.53   30.20
  -8 -10   0  719.33   29.70
  -8 -10   0  712.73   31.00
  -8 -10   0  664.93   29.20
  -8  10   0  730.03   30.70
   8  10   0  744.43   29.80
  -8 -10   0  719.23   31.30
   8  10   0  721.73   29.70
  -8  10   0  707.73   30.00
   9 -10   0   -0.10    2.00
  -9 -10   0    2.40    2.00
   9  10   0   -1.40    1.80
  -9  10   0    1.80    2.60
  -9  10   0   -2.50    1.50
  -9 -10   0    3.20    2.70
  -9 -10   0   -2.80    1.60
   9  10   0   -2.10    1.50
  -9  10   0    5.10    2.40
  -9 -10   0   -0.50    1.70
  -9 -10   0   -1.90    2.00
   9  10   0   -0.20    2.10
  10  10   0   52.19    6.40
 -10 -10   0   40.80    5.40
  10 -10   0   56.19    7.00
 -10  10   0   42.50    6.50
 -10 -10   0   60.79    9.40
 -10  10   0   44.20    7.00
 -10  10   0   49.30    6.10
 -10 -10   0   48.40    6.80
  10  10   0   41.80    6.10
 -10 -10   0   50.89    5.80
 -10 -10   0   31.90    5.70
  10  10   0   50.69    6.60
 -11  10   0    0.60    2.60
  11 -10   0   -0.80    2.30
 -11 -10   0   -1.60    2.70
 -11  10   0   -0.60    2.10
  11  10   0   -1.40    2.30
 -11 -10   0   -1.70    2.70
 -11 -10   0   -0.20    2.10
 -11  10   0   -0.20    2.70
 -11 -10   0   -0.60    1.70
  11  10   0   -0.50    2.50
 -12 -10   0   12.80    4.30
 -12 -10   0   12.00    3.60
 -12  10   0   12.80    4.30
 -12 -10   0    8.70    3.70
  12 -10   0    9.00    4.00
 -12  10   0    9.80    4.10
 -12 -10   0   11.00    4.70
 -12  10   0   11.30    3.40
  12  10   0    9.10    3.70
  13 -10   0    0.80    3.50
 -13 -10   0    1.30    2.70
 -13 -10   0   -0.70    3.70
 -13 -10   0    6.20    3.70
 -13  10   0    0.40    2.40
 -13  10   0    6.60    3.70
  13  10   0    4.30    3.10
 -13 -10   0    4.80    3.10
 -13  10   0    2.60    3.40
  14  10   0  116.29   10.10
 -14 -10   0   99.49    8.80
 -14  10   0  125.59    9.60
 -14  10   0  110.89   10.80
 -14  10   0  118.49   11.30
 -14 -10   0  131.59    9.90
 -14 -10   0  107.59   10.50
  14 -10   0  122.79   10.90
 -14 -10   0  130.99   13.30
  15 -10   0   -2.50    2.90
 -15  10   0    2.70    3.40
 -15  10   0   -1.20    2.80
 -15 -10   0   -5.90    2.30
 -15 -10   0   -3.70    3.20
 -15  10   0   -6.70    3.50
 -15 -10   0    0.00    4.50
  15  10   0   -2.70    2.50
  16 -10   0    8.30    4.60
 -16  10   0   -4.20    3.70
 -16 -10   0   -5.20    2.40
 -16  10   0   -1.00    2.70
 -16  10   0    0.50    2.90
  16  10   0    1.60    3.30
 -17  10   0   -3.30    2.40
 -17 -10   0   -1.70    3.60
 -17 -10   0    3.20    3.60
  17 -10   0    3.30    4.40
 -17  10   0   -0.70    3.00
 -17  10   0   -2.60    4.40
 -17 -10   0   15.80    4.90
  17  10   0   -0.10    2.80
 -18  10   0    6.80    4.70
 -18 -10   0    0.40    4.40
  18 -10   0   -7.00    3.10
  18  10   0   10.70    5.20
 -18  10   0    2.80    3.70
 -18  10   0   -4.50    4.00
 -18 -10   0    7.10    3.90
 -19 -10   0   -5.00    3.20
 -19 -10   0    2.50    4.60
  19 -10   0   -1.40    4.10
 -19  10   0   -0.90    4.00
 -19  10   0   -4.10    4.10
  19  10   0    1.50    3.80
 -19 -10   0   14.10    5.60
 -19  10   0   -4.90    2.30
  20 -10   0  116.09   14.90
  20  10   0  126.29   14.60
 -20  10   0  155.28   12.10
 -20  10   0  140.79   14.20
 -20  10   0  144.99   17.40
 -20 -10   0  110.79   12.50
 -20 -10   0  160.68   15.00
 -21 -10   0   -2.50    3.70
 -21 -10   0   -0.90    3.80
  21 -10   0   -0.40    5.10
 -21  10   0    2.40    5.20
 -21  10   0    0.70    3.40
  21  10   0    1.20    4.70
  22 -10   0    8.60    6.10
 -22 -10   0   12.00    7.00
  22 -10   0    6.90    6.30
 -22  10   0    7.60    4.40
 -22  10   0    3.80    5.40
  22  10   0   19.60    7.00
 -22  10   0    3.50    6.40
 -22 -10   0    8.80    5.20
  23  10   0    0.70    4.00
 -23 -10   0    1.40    4.80
 -23  10   0   -0.30    6.60
  23 -10   0   -2.60    5.20
  23 -10   0   12.10    6.10
 -23 -10   0   -0.30    5.30
 -23  10   0    2.10    4.00
 -23  10   0    7.10    5.00
 -24 -10   0    3.30    4.50
 -24  10   0    8.90    4.90
 -24 -10   0   10.70    6.60
  24  10   0   11.00    6.40
  24 -10   0   -0.30    5.70
 -24  10   0    4.70    4.70
 -24  10   0    2.40    6.60
  24 -10   0   17.90    7.50
   0  11   0   10.00    2.30
   0  11   0    5.30    1.90
   0 -11   0    7.60    2.50
   0 -11   0    7.50    2.20
   0 -11   0    9.10    2.70
   1 -11   0   -0.90    1.60
   1  11   0   -0.40    1.20
  -1  11   0   -2.00    1.50
  -1 -11   0    0.90    1.80
  -1 -11   0   -1.60    1.50
   1 -11   0    2.90    1.80
  -1  11   0   -0.70    1.50
   1  11   0   -0.50    1.00
   1  11   0    0.80    1.50
  -1  11   0   -1.30    1.20
   1 -11   0   -2.30    1.40
  -1  11   0   -0.30    1.50
  -1 -11   0    3.40    1.80
   2  11   0    7.50    2.20
  -2 -11   0    9.20    3.00
   2 -11   0   11.70    3.10
   2 -11   0    7.80    2.40
  -2  11   0   14.50    3.00
  -2 -11   0   12.00    3.10
  -2 -11   0    2.80    2.00
   2  11   0    8.90    2.30
  -2  11   0    7.50    2.50
   2 -11   0    5.70    2.30
  -2  11   0   12.40    2.50
   2  11   0   10.70    2.60
  -3  11   0    1.10    1.70
   3  11   0    1.00    1.40
  -3 -11   0    2.30    1.70
   3  11   0   -0.80    1.70
  -3 -11   0    0.40    1.60
  -3 -11   0    2.10    1.70
   3  11   0   -0.20    1.70
  -3 -11   0   -1.40    1.50
   3 -11   0   -0.90    1.80
   3  11   0    1.70    1.50
  -3  11   0    2.10    1.70
  -3 -11   0   -2.90    2.10
   4 -11   0   34.60    4.60
   4  11   0   38.70    4.50
  -4 -11   0   40.90    4.60
  -4  11   0   40.50    4.40
  -4 -11   0   32.60    5.10
  -4 -11   0   44.90    5.10
   4  11   0   41.70    5.10
  -4 -11   0   43.00    5.60
  -4 -11   0   44.40    6.40
   4 -11   0   26.20    4.50
   4  11   0   43.80    5.00
  -4  11   0   47.60    5.00
   4  11   0   35.90    3.70
   5 -11   0   -1.90    1.50
   5  11   0    1.80    2.10
   5 -11   0   -3.70    2.80
  -5 -11   0   -0.40    1.50
  -5 -11   0   -0.40    2.30
   5 -11   0   -1.50    1.50
   5 -11   0    1.90    2.10
  -5  11   0    0.80    1.80
   5  11   0   -2.40    1.40
   5  11   0    2.40    1.50
   5  11   0   -0.40    1.70
  -5 -11   0   -5.60    2.60
  -5  11   0    2.00    1.70
  -5 -11   0    1.10    1.90
  -5 -11   0   -1.00    1.70
  -5 -11   0    1.10    1.90
   6 -11   0  701.33   28.30
  -6 -11   0  662.33   29.60
  -6 -11   0  664.13   28.20
   6 -11   0  604.14   31.40
  -6 -11   0  696.03   33.10
   6 -11   0  713.33   29.30
   6  11   0  671.63   28.10
   6  11   0  670.63   28.70
  -6  11   0  702.13   27.90
   6 -11   0  658.33   29.30
   6  11   0  680.13   28.00
  -6 -11   0  674.23   28.00
  -6  11   0  735.73   28.90
  -6 -11   0  680.03   29.80
  -7 -11   0    0.90    2.00
   7 -11   0   -0.40    1.60
  -7 -11   0   -1.30    1.70
   7 -11   0   -1.70    1.90
   7  11   0    0.40    1.80
  -7 -11   0   -1.30    2.40
  -7 -11   0    3.30    2.30
   7  11   0    0.90    2.40
  -7  11   0   -2.00    1.40
  -7 -11   0    0.70    2.10
   7  11   0   -1.30    1.50
   7 -11   0   -1.10    2.90
   7 -11   0   -0.30    1.90
   8  11   0  229.78   12.10
  -8 -11   0  227.18   12.10
  -8 -11   0  221.28   12.10
  -8 -11   0  231.18   13.40
  -8 -11   0  228.88   13.60
  -8  11   0  222.48   12.90
   8 -11   0  211.78   12.20
   8  11   0  224.08   12.10
   8  11   0  214.58   12.70
  -8 -11   0  229.68   15.90
   8 -11   0  211.18   13.00
  -9 -11   0   -0.90    3.00
  -9 -11   0    5.20    2.60
   9  11   0   -0.20    1.80
  -9  11   0    0.50    2.10
  -9  11   0    4.60    2.50
   9 -11   0   -2.10    1.70
  -9 -11   0   -0.50    2.10
   9  11   0   -2.70    1.50
  -9 -11   0   -0.60    2.00
   9  11   0    2.00    2.20
  -9 -11   0   -0.80    2.20
  10 -11   0  197.38   12.30
 -10  11   0  219.28   13.10
  10  11   0  208.78   12.00
 -10  11   0  191.88   13.40
 -10 -11   0  202.28   15.30
  10  11   0  204.68   11.80
  10  11   0  209.68   12.60
 -10 -11   0  212.88   11.90
 -10 -11   0  190.28   13.00
 -10  11   0  181.48   11.70
 -10 -11   0  202.08   11.80
 -10 -11   0  189.18   12.70
 -11 -11   0    0.30    2.60
  11  11   0   -0.20    2.60
 -11 -11   0    7.50    3.80
 -11  11   0   -0.20    2.80
 -11 -11   0    7.00    4.50
  11  11   0    3.90    3.00
  11 -11   0    7.00    3.60
 -11  11   0    5.90    3.30
 -11  11   0    6.20    2.90
 -11 -11   0   -0.30    2.30
 -11 -11   0    5.70    3.10
 -12  11   0    3.00    3.40
 -12 -11   0    0.20    3.40
 -12  11   0   -4.70    2.30
  12  11   0   -2.80    2.40
 -12 -11   0    1.00    3.10
 -12  11   0    2.20    2.40
  12  11   0   -2.30    2.40
 -12 -11   0   -0.10    2.30
  12 -11   0    4.00    3.60
 -12 -11   0   -2.20    1.80
 -13 -11   0   -0.20    3.00
  13  11   0    4.50    3.80
 -13 -11   0    6.30    4.00
 -13 -11   0   -6.00    1.80
 -13  11   0    1.00    2.70
  13 -11   0   -1.60    2.60
  13  11   0    0.90    2.80
 -13  11   0   -2.30    3.10
 -13 -11   0   -1.10    2.40
 -13  11   0   -1.50    2.90
 -14 -11   0   38.70    7.40
 -14 -11   0   43.80    6.80
 -14  11   0   28.60    6.90
 -14  11   0   45.30    7.90
 -14  11   0   28.90    5.50
  14 -11   0   36.20    7.10
  14  11   0   47.40    7.30
 -14 -11   0   35.40    9.00
 -14 -11   0   48.50    6.90
 -15  11   0   -5.40    2.60
 -15 -11   0    3.40    2.90
 -15  11   0    2.70    4.20
  15 -11   0    2.90    3.90
  15  11   0    0.10    3.10
 -15 -11   0   10.40    4.90
 -15  11   0   -1.00    2.90
 -15 -11   0    2.10    3.50
 -15 -11   0   -1.30    2.60
 -16  11   0   64.89   10.50
 -16 -11   0  112.99   12.10
 -16  11   0   69.19    8.90
 -16  11   0   59.79    9.70
 -16 -11   0   72.59    8.90
  16  11   0   62.49    9.00
 -16 -11   0   82.59    9.30
 -16 -11   0   67.59   10.00
  16 -11   0   71.99   10.30
  17 -11   0   -3.00    4.20
 -17  11   0    4.40    3.80
 -17 -11   0   -2.90    2.70
 -17 -11   0    4.90    4.80
 -17  11   0   -5.30    3.90
 -17 -11   0   -4.80    2.70
 -17  11   0    0.80    3.80
  17  11   0    4.10    4.00
 -18 -11   0    6.00    5.30
 -18 -11   0   -1.50    2.90
 -18  11   0   -0.50    3.50
 -18  11   0   -2.20    3.50
  18  11   0   -1.00    3.50
 -18 -11   0   -5.70    2.50
  18 -11   0   -2.40    4.20
 -18 -11   0   22.60    6.20
 -18  11   0    7.00    5.30
  19  11   0    0.20    4.30
 -19  11   0   -0.60    3.20
 -19 -11   0   26.70    6.60
  19 -11   0    1.00    4.60
 -19 -11   0    1.90    3.20
 -19 -11   0   -4.20    4.10
 -19  11   0   -2.40    4.40
 -19  11   0   -1.70    3.50
 -19 -11   0    0.80    3.50
 -20  11   0   19.90    5.80
 -20  11   0    4.40    5.40
  20 -11   0    7.70    5.40
 -20 -11   0   24.60    8.30
 -20 -11   0   18.60    5.70
 -20  11   0   14.70    7.00
  20  11   0    3.80    4.90
 -21  11   0    8.50    4.90
 -21 -11   0    0.80    3.90
 -21  11   0   -0.30    5.30
 -21 -11   0   -8.10    3.20
  21 -11   0    2.00    4.90
  21  11   0   -1.80    4.40
 -21  11   0   -5.90    2.30
 -22  11   0   55.19    9.10
 -22 -11   0   76.49   12.90
 -22  11   0   67.29   12.40
 -22 -11   0   66.69   10.10
  22  11   0   66.79   11.40
  22 -11   0   55.69   11.00
 -22  11   0   49.00   10.70
 -23  11   0    9.60    4.60
 -23  11   0   -2.60    4.40
  23 -11   0   -3.20    5.40
  23  11   0   -4.10    4.40
  23 -11   0   -2.90    4.90
 -23  11   0   -1.20    5.90
 -23 -11   0    2.40    4.10
 -23 -11   0    2.20    5.60
 -24  11   0  154.18   15.80
  24 -11   0   94.09   14.10
 -24  11   0  105.59   12.40
 -24 -11   0   93.49   15.10
 -24 -11   0   68.09   11.30
  24  11   0  106.09   14.30
 -24  11   0  119.89   17.90
  24 -11   0   87.89   14.40
   0 -12   0   21.80    4.10
   0 -12   0   20.80    4.00
   0  12   0   24.30    3.30
   0  12   0   26.50    3.60
   0  12   0   32.90    4.10
   0 -12   0   25.30    3.90
  -1  12   0   -3.20    1.20
  -1 -12   0   -2.10    1.20
   1 -12   0   -1.00    1.50
  -1 -12   0    2.80    2.60
   1  12   0   -0.20    1.70
  -1  12   0   -1.60    1.20
  -1  12   0   -0.40    1.80
  -1 -12   0    2.00    2.00
   1 -12   0   -2.80    1.40
  -1  12   0   -1.80    1.30
   1  12   0   -3.80    1.00
   1 -12   0    0.50    1.70
  -1 -12   0    0.90    1.80
   1  12   0    0.20    1.50
   2 -12   0   51.39    5.20
   2 -12   0   56.59    5.00
  -2  12   0   58.09    5.30
  -2 -12   0   62.39    6.80
  -2  12   0   49.90    4.50
   2  12   0   58.49    5.00
  -2  12   0   59.49    5.20
   2  12   0   58.19    4.80
   2 -12   0   56.49    4.60
   2  12   0   61.09    5.00
  -2 -12   0   66.89    7.10
  -2 -12   0   56.99    5.70
  -2 -12   0   52.99    5.50
   2 -12   0   55.49    6.60
   3 -12   0    0.40    1.90
  -3 -12   0    2.00    2.00
  -3  12   0    2.80    1.90
  -3 -12   0   -0.50    1.80
   3  12   0    1.50    1.70
  -3  12   0   -0.50    1.80
   3 -12   0   -0.20    1.70
  -3 -12   0   -1.30    1.70
   3 -12   0   -0.70    1.40
   3  12   0    1.30    1.90
  -3 -12   0   -0.10    1.50
   3  12   0   -1.50    1.20
   3  12   0    1.70    2.10
  -3 -12   0    1.30    2.60
  -4 -12   0  151.88    8.90
   4 -12   0  159.88    8.80
   4  12   0  150.28    8.70
   4  12   0  141.79    9.20
   4  12   0  149.19    9.10
   4  12   0  138.79    8.90
  -4 -12   0  158.98    9.20
   4 -12   0  152.18   10.10
  -4  12   0  169.38    9.40
  -4  12   0  157.08    8.70
  -4 -12   0  169.28   10.50
  -4 -12   0  170.28   10.40
   4 -12   0  165.88    9.40
  -4 -12   0  160.48   10.70
  -5  12   0   -0.30    1.50
   5 -12   0   -1.10    3.00
   5 -12   0    1.00    1.80
  -5 -12   0   -2.70    1.40
  -5 -12   0    0.30    2.70
  -5  12   0    0.90    1.70
   5 -12   0   -1.10    1.80
   5  12   0   -1.60    1.60
  -5 -12   0   -1.20    1.50
   5 -12   0   -0.70    1.40
   5  12   0   -4.00    1.20
   5  12   0    2.10    2.30
  -5 -12   0   -1.90    1.70
  -5 -12   0   -0.70    3.10
   5  12   0   -0.20    1.50
  -5 -12   0   -1.30    1.50
   6 -12   0 1108.69   46.20
  -6  12   0 1176.18   45.50
  -6  12   0 1169.58   44.50
   6  12   0 1189.78   45.60
   6 -12   0 1213.78   46.10
  -6 -12   0 1103.09   44.70
   6  12   0 1135.79   44.90
  -6 -12   0 1066.29   46.50
   6 -12   0 1168.58   44.80
  -6 -12   0 1143.79   50.59
   6 -12   0 1116.99   49.10
   6  12   0 1125.99   44.60
  -6 -12   0 1165.78   46.80
  -6 -12   0 1103.89   44.90
  -7 -12   0   -1.10    2.30
   7 -12   0    6.40    4.00
  -7  12   0   -2.50    1.60
  -7 -12   0   -1.40    1.20
   7  12   0    3.30    2.60
   7 -12   0   -0.10    1.70
   7  12   0    2.80    2.10
   7 -12   0   -2.50    2.00
   7 -12   0   -0.40    2.30
  -7 -12   0    0.20    2.10
  -7 -12   0    2.80    2.70
   7  12   0   -0.70    1.60
  -7 -12   0    3.70    2.80
   8  12   0  466.25   20.80
   8 -12   0  456.65   22.10
  -8  12   0  469.45   21.60
  -8 -12   0  433.06   22.10
   8 -12   0  445.26   20.80
   8 -12   0  454.95   22.00
   8  12   0  436.16   21.40
  -8 -12   0  455.25   20.60
  -8 -12   0  451.75   20.70
  -8 -12   0  446.66   22.30
  -8 -12   0  440.16   25.30
   8  12   0  481.65   20.90
   9  12   0    2.40    2.30
  -9 -12   0    1.40    2.30
  -9 -12   0   -2.70    1.70
  -9 -12   0    1.00    2.60
  -9  12   0   -0.90    1.90
  -9 -12   0   -3.80    2.30
  -9 -12   0   -2.80    1.90
  -9  12   0    3.70    2.70
   9  12   0   -0.30    2.40
   9  12   0   -1.70    2.00
   9 -12   0   -0.90    2.10
   9 -12   0   -2.40    2.20
  10  12   0   16.70    4.40
 -10 -12   0   25.80    7.00
 -10 -12   0   23.60    5.50
 -10  12   0   27.50    5.10
  10  12   0   21.70    4.60
 -10 -12   0   27.10    4.70
 -10 -12   0   28.20    5.70
  10 -12   0   28.90    5.30
 -10  12   0   30.20    6.00
 -10 -12   0   30.30    5.00
 -10  12   0   35.70    5.80
  10  12   0   22.10    4.70
  11  12   0   -1.50    2.20
 -11 -12   0   -1.70    2.90
 -11 -12   0   -2.10    2.50
 -11 -12   0    2.80    2.70
 -11  12   0   -2.40    1.80
 -11  12   0    7.10    3.90
  11 -12   0    0.30    2.60
  11  12   0    0.00    2.90
 -11  12   0   -2.80    2.30
 -11 -12   0   -0.80    3.10
  11  12   0   -6.10    2.60
 -11 -12   0    1.30    2.30
  12 -12   0  106.79    9.40
 -12 -12   0  109.09    8.80
 -12  12   0  119.79   10.60
 -12  12   0  116.89   10.00
 -12 -12   0  107.69   12.30
 -12 -12   0  102.29   10.20
  12  12   0  102.89    9.40
 -12 -12   0  109.39    8.80
 -12  12   0  107.59    8.80
  12  12   0  119.49    9.00
 -13  12   0   -3.40    3.10
 -13 -12   0   -2.90    2.00
  13  12   0   -6.50    2.10
 -13 -12   0    2.00    3.60
 -13  12   0   -0.50    2.50
  13 -12   0    0.80    3.20
 -13 -12   0   -2.70    4.00
 -13 -12   0   -0.40    2.40
 -13  12   0    2.40    2.90
  13  12   0   -1.10    3.00
  14  12   0  298.67   16.60
 -14  12   0  266.27   17.90
 -14 -12   0  302.77   21.40
 -14 -12   0  266.87   18.00
 -14 -12   0  256.57   15.50
 -14 -12   0  288.97   16.30
  14 -12   0  254.67   16.80
  14  12   0  247.58   16.50
 -14  12   0  271.77   16.00
 -14  12   0  283.17   18.00
  15 -12   0   -3.10    2.60
 -15  12   0    1.80    3.90
  15  12   0   -0.30    3.70
 -15 -12   0    2.20    3.80
 -15 -12   0   -0.30    2.60
 -15 -12   0   -0.10    4.50
 -15 -12   0   -2.00    3.00
 -15  12   0    3.60    3.70
  15  12   0    0.20    3.40
 -15  12   0   -1.90    2.60
  16  12   0    0.30    3.70
  16  12   0    7.50    4.40
 -16 -12   0   -0.60    3.00
 -16 -12   0    1.00    3.40
 -16  12   0    3.60    3.40
 -16 -12   0   10.00    5.10
 -16  12   0    5.20    4.20
 -16 -12   0   28.00    7.30
  16 -12   0   -3.10    3.30
 -16  12   0    2.40    4.70
 -17  12   0   -6.10    3.80
 -17  12   0    4.40    4.00
  17 -12   0    1.70    4.20
 -17 -12   0    5.40    4.50
  17  12   0    1.40    4.00
 -17 -12   0   25.80    7.10
 -17 -12   0   -1.70    2.90
 -17 -12   0   -4.60    2.60
 -17  12   0   -1.70    2.90
  18  12   0    4.80    4.50
 -18  12   0    3.00    5.20
 -18 -12   0    4.10    4.60
 -18  12   0    5.60    4.20
 -18 -12   0   -0.30    3.10
  18 -12   0    3.70    4.40
 -18  12   0   -4.40    2.80
 -18 -12   0   -0.50    2.90
  19 -12   0   -8.40    3.70
 -19  12   0   -4.30    4.60
  19  12   0    3.70    4.60
 -19 -12   0   -2.00    3.90
 -19 -12   0   -4.90    3.30
 -19  12   0    3.50    3.80
 -19  12   0   -1.30    3.30
 -20  12   0   10.40    4.50
 -20 -12   0    6.30    4.30
 -20  12   0   24.20    6.60
  20 -12   0   -0.40    4.50
 -20  12   0    7.20    5.60
 -20 -12   0   12.50    6.60
  20  12   0   10.80    5.60
 -21 -12   0   -4.10    2.90
 -21  12   0   -5.30    2.90
  21 -12   0   -2.10    4.40
 -21  12   0    5.30    4.50
  21  12   0   -5.10    3.30
 -21 -12   0    9.80    6.30
 -21  12   0    0.00    5.40
 -22  12   0   -3.40    3.00
 -22 -12   0    7.10    5.20
  22  12   0    6.60    5.60
  22 -12   0    8.20    5.80
 -22  12   0   -2.90    3.70
 -22  12   0    8.50    7.10
 -22 -12   0    2.40    4.80
  23 -12   0   -3.90    5.00
 -23  12   0  -11.60    4.80
 -23 -12   0   11.10    7.20
  23  12   0   -0.80    4.60
 -23 -12   0   -1.50    4.00
 -23  12   0   -4.60    3.70
  24  12   0   -0.30    4.30
 -24 -12   0    1.10    4.00
  24 -12   0   -7.70    5.00
   0  13   0    6.00    2.40
   0 -13   0   12.20    3.10
   0 -13   0    4.30    2.90
   0 -13   0    5.60    2.10
   0  13   0    7.10    2.30
   0 -13   0    6.60    2.70
   0  13   0    9.80    2.50
   1 -13   0    0.70    1.70
  -1  13   0    1.90    1.70
  -1 -13   0   -1.90    2.10
  -1 -13   0    1.00    1.70
   1  13   0   -2.90    1.30
  -1 -13   0   -1.10    1.80
  -1 -13   0    2.10    2.10
  -1  13   0    0.30    1.70
   1  13   0    3.50    1.80
  -1  13   0    2.70    2.20
   1 -13   0    1.60    2.20
   1 -13   0   -0.20    1.60
  -1  13   0   -0.80    1.50
   1  13   0   -0.60    1.60
  -2 -13   0   20.10    3.60
   2 -13   0   26.20    4.60
  -2  13   0   22.60    4.10
   2  13   0   21.80    3.50
  -2 -13   0   21.20    4.20
  -2 -13   0   36.10    5.30
   2  13   0   21.80    3.80
   2 -13   0   23.00    4.30
  -2  13   0   18.30    3.20
   2 -13   0   24.30    3.90
  -2  13   0   23.50    4.00
   2 -13   0   30.10    3.90
  -2 -13   0   24.40    4.50
   2  13   0   26.90    3.90
   2 -13   0   22.70    4.50
   3  13   0    0.10    1.80
  -3 -13   0   -1.30    2.60
  -3 -13   0   -0.90    2.00
  -3  13   0   -0.80    1.90
   3  13   0   -0.50    1.60
  -3  13   0    1.70    1.80
   3 -13   0   -0.50    1.40
   3 -13   0   -0.70    1.40
   3 -13   0   -1.70    2.70
   3 -13   0    0.40    2.10
   3  13   0   -0.60    1.50
  -3 -13   0    0.10    1.90
  -3  13   0    0.80    1.60
  -4 -13   0   99.69    8.00
   4  13   0  100.39    7.40
   4 -13   0  103.39    8.10
   4 -13   0  104.89    7.40
   4 -13   0  104.09    9.10
  -4 -13   0  108.29    8.40
  -4 -13   0   92.99    8.60
   4  13   0   98.39    6.80
  -4 -13   0  113.29    7.40
   4  13   0   97.89    7.20
   4 -13   0  100.09    6.70
   4  13   0  110.99    7.70
  -4  13   0  116.29    7.60
  -4 -13   0  102.09    7.10
  -4  13   0   94.49    6.60
  -5  13   0    0.20    1.80
   5  13   0   -1.40    2.20
  -5 -13   0   -0.80    1.80
   5  13   0    0.40    1.50
   5 -13   0    1.90    1.60
  -5 -13   0   -1.30    1.80
   5 -13   0    2.30    3.20
   5  13   0    0.60    2.00
   5 -13   0   -1.50    2.10
  -5 -13   0    3.60    3.50
  -5 -13   0   -1.40    1.60
  -5  13   0   -1.10    1.70
   5 -13   0   -0.30    1.80
   5  13   0    1.00    2.20
  -5 -13   0    0.20    1.70
  -6 -13   0   18.30    5.60
   6  13   0   22.50    3.80
   6 -13   0   15.40    5.40
   6 -13   0   20.10    3.80
  -6 -13   0   19.20    3.50
  -6 -13   0   19.00    4.40
  -6 -13   0   17.70    5.70
  -6 -13   0   15.90    4.10
   6  13   0   14.20    3.70
  -6  13   0   15.60    3.40
   6  13   0   16.20    3.80
  -6 -13   0   18.80    4.10
   6 -13   0   18.70    4.20
  -6  13   0   13.10    3.10
   6 -13   0   14.70    3.70
   7 -13   0    2.00    2.60
   7  13   0    2.50    2.20
   7 -13   0   -3.60    1.80
  -7 -13   0    5.20    2.90
  -7 -13   0    2.90    2.10
   7  13   0   -0.70    1.80
  -7 -13   0   -0.90    1.80
   7 -13   0   -2.30    1.90
  -7 -13   0   -0.60    2.60
   7  13   0   -0.20    2.10
  -7  13   0   -4.00    1.60
  -7 -13   0   -3.20    1.80
   7 -13   0    3.80    4.30
  -8 -13   0    2.60    2.90
   8  13   0   11.10    3.80
  -8 -13   0    4.80    3.60
  -8 -13   0   11.40    3.60
  -8 -13   0    9.90    3.10
   8 -13   0   10.40    3.30
  -8  13   0    8.40    3.20
   8 -13   0   10.70    3.50
   8  13   0    9.80    2.90
   8 -13   0    8.40    3.50
  -8 -13   0   12.70    4.00
   8  13   0    8.80    3.00
   9  13   0   -2.10    2.40
   9 -13   0   -3.00    2.10
  -9  13   0    1.50    2.30
   9 -13   0   -1.60    2.10
  -9  13   0   -1.00    2.30
  -9 -13   0   -0.60    1.80
   9  13   0   -2.30    2.00
  -9 -13   0    2.70    3.00
  -9 -13   0    4.70    4.10
  -9 -13   0   -1.90    1.50
  -9 -13   0   -0.30    2.10
   9  13   0    1.30    2.20
   9 -13   0    1.30    2.50
 -10 -13   0  277.07   16.60
  10  13   0  269.87   15.80
 -10 -13   0  269.27   14.90
 -10 -13   0  276.97   16.70
  10 -13   0  271.17   15.30
 -10  13   0  313.17   16.50
  10 -13   0  273.67   16.50
 -10 -13   0  268.07   15.00
 -10  13   0  268.57   15.50
  10  13   0  294.37   15.50
 -10 -13   0  293.37   19.90
  10  13   0  281.87   15.10
  10 -13   0  281.47   16.30
  11 -13   0   -2.20    2.30
  11  13   0    1.00    2.40
  11 -13   0   -0.40    3.20
 -11 -13   0   -2.50    3.80
  11  13   0    5.60    4.10
 -11  13   0   -2.60    2.50
 -11  13   0    4.80    3.00
 -11 -13   0    3.40    2.90
  11  13   0   -0.70    2.60
 -11 -13   0   -1.60    2.40
 -11 -13   0    0.10    2.20
 -11  13   0    2.70    3.40
 -11 -13   0    6.50    2.70
  12 -13   0   34.00    6.20
 -12  13   0   33.60    6.90
 -12 -13   0   35.00    8.80
  12  13   0   38.00    6.70
 -12 -13   0   21.10    5.60
 -12  13   0   30.60    5.70
 -12  13   0   32.80    6.40
 -12 -13   0   22.30    5.10
 -12 -13   0   38.30    5.80
 -12 -13   0   33.70    6.70
  12  13   0   39.60    6.10
 -13  13   0   -2.10    2.80
 -13 -13   0    1.70    2.50
  13  13   0    2.40    3.60
 -13 -13   0    1.90    2.80
 -13  13   0    3.80    3.70
 -13 -13   0    9.40    5.00
  13  13   0    1.60    3.20
 -13  13   0    1.00    3.30
  13 -13   0    1.00    3.60
 -13 -13   0    1.30    4.20
 -14  13   0  427.16   24.30
 -14 -13   0  423.06   24.00
 -14 -13   0  419.96   21.80
 -14 -13   0  429.26   27.40
  14 -13   0  379.46   22.00
  14  13   0  449.95   23.20
 -14 -13   0  397.96   21.10
 -14  13   0  440.56   23.70
 -14  13   0  404.46   21.40
  14  13   0  426.16   21.70
  15  13   0    2.70    3.40
  15  13   0    0.60    4.10
 -15  13   0    5.90    4.20
  15 -13   0    1.20    3.50
 -15 -13   0    2.80    4.00
 -15 -13   0    3.50    3.40
 -15  13   0   -3.40    3.60
 -15 -13   0   -5.20    1.70
 -15 -13   0    3.50    4.50
 -15  13   0   -0.50    3.10
  16 -13   0  151.08   13.10
  16  13   0  148.29   13.00
 -16 -13   0  156.18   11.90
 -16  13   0  143.29   11.60
  16  13   0  155.18   12.30
 -16  13   0  138.79   13.10
 -16  13   0  142.29   13.30
 -16 -13   0  136.09   11.50
 -16 -13   0  175.08   14.50
 -16 -13   0  193.08   17.40
  17  13   0    0.30    3.50
 -17  13   0    1.80    5.10
 -17 -13   0    4.20    4.30
 -17 -13   0   -3.50    2.60
  17 -13   0   -4.50    3.40
 -17 -13   0   15.50    5.90
 -17  13   0   -0.30    3.60
  17  13   0    2.20    4.30
 -17  13   0    1.70    3.30
 -17 -13   0   -3.90    2.90
 -18 -13   0    8.00    4.60
  18  13   0   -1.70    4.30
  18 -13   0    6.70    5.00
  18  13   0    1.90    3.90
 -18  13   0    8.30    4.50
 -18  13   0    4.40    4.70
 -18 -13   0   38.60    9.30
 -18  13   0   12.40    5.90
 -18 -13   0   -0.10    3.30
 -18 -13   0   10.70    5.80
 -19 -13   0   22.10    8.50
 -19  13   0   -5.20    2.60
 -19 -13   0   -4.10    4.50
  19  13   0   -0.20    4.60
 -19  13   0   -2.80    3.00
  19  13   0   -3.20    3.90
 -19 -13   0    2.60    3.90
  19 -13   0    0.70    4.20
 -19  13   0    0.30    4.40
 -20 -13   0   17.30    7.00
  20  13   0   22.90    7.10
  20 -13   0   36.80    8.80
 -20 -13   0   29.50    7.00
 -20  13   0   25.90    8.00
 -20  13   0   34.50    7.10
 -20  13   0   18.10    6.70
  20  13   0   40.20    9.20
 -21 -13   0    1.50    3.90
 -21  13   0    5.10    6.00
 -21  13   0   -2.10    4.00
  21 -13   0    4.90    5.00
 -21  13   0   -0.40    3.20
  21  13   0   10.00    5.90
  21  13   0    9.60    6.00
 -21 -13   0   10.80    6.70
  22 -13   0   19.60    7.30
 -22  13   0   21.80    7.10
 -22  13   0    1.80    4.10
 -22  13   0   21.20    8.30
  22  13   0   21.20    7.60
 -22 -13   0   31.50    9.00
  22  13   0    5.70    5.50
 -22 -13   0   24.20    6.90
 -23  13   0    2.40    6.20
  23 -13   0    5.50    5.70
  23  13   0   -0.60    6.00
 -23 -13   0    1.90    4.50
 -23  13   0   -2.80    3.60
 -23  13   0    1.80    4.30
 -23 -13   0   12.40    7.10
  23  13   0    1.10    5.10
   0  14   0   37.00    4.70
   0  14   0   25.50    3.90
   0 -14   0   31.00    5.30
   0 -14   0   34.10    5.60
   0  14   0   29.50    4.30
   0 -14   0   30.70    4.50
   0 -14   0   35.50    5.30
  -1  14   0   -1.80    1.50
   1 -14   0   -2.20    1.90
  -1  14   0   -1.60    1.80
   1 -14   0   -1.30    1.90
   1  14   0   -2.40    1.00
  -1 -14   0    0.80    2.40
   1 -14   0   -0.40    1.70
  -1  14   0   -1.70    1.60
  -1 -14   0   -2.30    1.70
   1  14   0   -2.10    1.60
   1 -14   0   -1.10    1.10
  -1 -14   0   -1.40    1.80
  -1 -14   0   -0.90    1.60
   1 -14   0    0.60    2.60
   1  14   0    0.30    1.60
   2 -14   0   13.00    3.70
   2 -14   0   20.10    3.90
  -2  14   0   17.10    3.70
  -2  14   0   21.60    3.90
  -2 -14   0   17.90    4.20
  -2 -14   0   18.00    4.00
  -2 -14   0   13.40    3.20
  -2  14   0   11.40    3.00
   2 -14   0   20.40    4.00
   2  14   0   18.90    3.40
  -2 -14   0   18.80    4.20
   2 -14   0   17.60    3.50
   2 -14   0   15.60    4.40
   2  14   0   16.90    3.60
   2  14   0   15.90    3.10
   3  14   0   -0.60    1.80
  -3  14   0    1.50    1.90
   3 -14   0   -0.90    2.00
   3 -14   0   -1.20    1.50
  -3 -14   0    0.60    1.80
  -3 -14   0    1.10    2.00
  -3 -14   0    0.30    2.00
   3  14   0    0.60    1.60
   3  14   0    1.70    1.90
  -3  14   0   -0.60    1.90
  -3 -14   0   -0.60    2.50
   3 -14   0    1.80    3.10
   3 -14   0    0.10    1.60
  -3  14   0    1.20    1.80
   4 -14   0    2.20    1.90
  -4 -14   0   -0.40    1.80
  -4 -14   0    3.90    2.30
  -4 -14   0    2.00    2.00
   4 -14   0    2.10    3.00
   4 -14   0    4.80    2.40
  -4  14   0    0.90    1.90
   4  14   0   -3.30    1.60
  -4 -14   0   -2.00    1.50
   4  14   0    1.90    2.00
  -4  14   0   -1.20    1.80
  -4 -14   0    0.20    3.00
   4 -14   0    0.90    2.30
   4  14   0    4.30    1.90
   4  14   0   -0.40    1.80
  -4  14   0   -0.70    2.20
   5 -14   0    0.00    2.10
   5  14   0   -0.90    1.90
   5  14   0   -1.00    1.70
  -5 -14   0   -1.30    2.90
   5 -14   0   -2.70    1.60
   5 -14   0   -2.00    2.80
  -5  14   0    2.00    2.10
  -5 -14   0   -1.30    1.90
  -5  14   0    1.90    2.10
   5 -14   0   -1.20    1.90
   5  14   0   -1.00    1.80
  -5 -14   0    0.80    2.40
  -5 -14   0   -0.10    2.00
  -5 -14   0   -3.40    1.50
   5  14   0    0.80    2.40
  -6  14   0   18.90    3.80
  -6 -14   0   28.70    4.80
   6  14   0   27.40    4.40
  -6  14   0   29.00    4.50
   6  14   0   27.10    4.20
  -6 -14   0   17.20    6.00
   6 -14   0   36.90    4.80
   6 -14   0   23.20    4.90
   6 -14   0   22.30    4.60
  -6 -14   0   29.60    5.50
   6 -14   0   26.40    6.40
   6  14   0   15.20    3.90
  -6 -14   0   35.90    7.70
  -6 -14   0   23.20    4.80
  -6 -14   0   19.20    3.70
   6  14   0   28.10    4.90
   7 -14   0   -1.00    2.20
   7 -14   0    0.10    3.30
  -7 -14   0   -2.70    2.10
   7 -14   0   -1.00    1.90
  -7 -14   0    7.40    3.30
  -7  14   0   -1.90    1.60
  -7 -14   0   -7.40    3.70
   7  14   0   -0.50    2.50
  -7 -14   0    3.70    3.00
   7  14   0    5.00    2.80
   7 -14   0    0.20    2.10
  -7 -14   0    2.70    2.20
  -7  14   0   -1.00    2.40
  -7 -14   0    3.60    3.40
   7  14   0    1.20    2.10
  -8 -14   0   62.19    7.10
   8  14   0   55.79    7.10
  -8 -14   0   63.69    8.20
   8 -14   0   65.59    8.00
   8 -14   0   50.79    9.20
   8 -14   0   47.40    7.10
  -8 -14   0   70.99    8.70
   8 -14   0   51.99    6.30
  -8 -14   0   70.99    6.40
  -8  14   0   68.19    7.40
  -8 -14   0   67.39   10.70
   8  14   0   58.09    6.00
   8  14   0   51.59    6.50
   9  14   0   -0.90    2.20
  -9 -14   0    0.90    4.10
   9  14   0   -0.90    2.50
  -9  14   0   -2.80    2.20
   9 -14   0    2.90    2.80
  -9 -14   0    0.10    2.50
  -9 -14   0    1.00    2.90
   9  14   0    8.40    3.20
  -9 -14   0    2.40    2.10
   9 -14   0    0.60    2.70
   9 -14   0    1.50    2.70
  -9 -14   0   -1.60    2.30
  10  14   0    3.10    3.20
 -10 -14   0    2.60    3.60
 -10 -14   0    3.80    4.70
  10 -14   0   12.80    4.30
  10 -14   0    7.40    3.70
  10 -14   0    4.00    3.20
  10  14   0    6.30    4.20
 -10  14   0    2.50    2.90
 -10 -14   0    6.60    2.90
  10  14   0    7.70    3.50
 -10 -14   0    3.90    3.20
 -10  14   0    4.60    3.00
 -10 -14   0    5.60    2.90
  11 -14   0    1.70    3.20
 -11 -14   0   -5.20    2.60
  11 -14   0   -3.60    2.40
  11  14   0    0.30    3.50
  11  14   0    2.10    3.70
  11 -14   0   -0.70    2.90
  11  14   0    1.40    2.80
 -11 -14   0   -1.50    2.60
 -11 -14   0   -2.70    2.30
 -11 -14   0    1.10    2.50
 -11 -14   0    3.70    4.00
 -11  14   0   -6.90    2.60
 -11  14   0   -1.90    2.40
 -11  14   0   -0.90    2.40
 -12 -14   0  126.59    9.90
  12  14   0  120.59    9.50
  12 -14   0  116.09   10.00
  12  14   0  146.29   10.60
 -12 -14   0  107.09   12.70
 -12  14   0  133.89   10.90
 -12  14   0  139.49   10.50
 -12 -14   0  125.09   11.00
 -12 -14   0  131.69    9.90
  12 -14   0  128.69   11.20
 -12 -14   0  135.39   11.70
 -12  14   0  134.09   11.90
  12  14   0  135.19   11.10
 -13  14   0    2.10    3.30
  13  14   0    1.10    3.30
 -13 -14   0    4.50    4.90
 -13  14   0   -3.30    2.80
 -13 -14   0    1.10    3.50
 -13 -14   0   -0.70    2.20
  13 -14   0    1.80    4.00
  13 -14   0   -2.20    2.70
 -13 -14   0   -2.60    2.90
  13  14   0    6.00    3.90
 -13  14   0    1.10    2.90
 -14 -14   0  253.27   17.50
 -14 -14   0  270.77   21.20
 -14  14   0  221.98   17.10
  14  14   0  269.17   17.10
 -14 -14   0  242.18   15.20
  14 -14   0  267.37   16.50
 -14  14   0  250.07   15.70
 -14  14   0  267.97   17.10
  14  14   0  278.57   16.00
 -14 -14   0  275.37   16.10
 -15 -14   0    3.80    4.20
 -15 -14   0    0.10    3.30
 -15  14   0    5.00    4.50
  15  14   0   -1.00    3.40
  15  14   0   -5.60    2.90
 -15 -14   0    7.50    3.60
 -15 -14   0    8.20    5.10
  15 -14   0   -2.90    3.40
 -15  14   0   -3.30    3.20
 -15  14   0    4.10    3.80
 -16 -14   0   -0.10    4.30
  16  14   0    6.50    4.20
 -16  14   0   -0.30    3.70
 -16 -14   0   -3.40    2.90
 -16  14   0    2.90    4.10
 -16  14   0    3.10    3.60
  16  14   0    1.60    4.00
  16 -14   0    1.10    4.40
 -16 -14   0    6.40    3.50
 -17 -14   0    4.80    3.00
  17 -14   0    9.80    4.60
 -17  14   0   -3.20    4.00
 -17 -14   0   -9.40    2.90
  17  14   0   -1.00    3.70
 -17 -14   0    1.70    3.70
  17  14   0    8.10    5.50
 -17  14   0    3.80    4.60
 -17  14   0   -3.40    2.70
 -18  14   0    8.90    6.30
 -18  14   0   15.70    5.30
 -18 -14   0    5.70    5.00
 -18  14   0   17.00    6.00
  18  14   0   -2.30    4.00
 -18 -14   0   13.70    5.10
 -18 -14   0   10.90    6.40
  18  14   0   11.90    5.80
  18 -14   0   11.80    6.30
 -19  14   0    1.00    4.30
 -19 -14   0   -6.40    3.60
 -19  14   0   -3.40    3.90
  19  14   0    0.30    4.20
  19  14   0    1.40    4.40
 -19  14   0    1.10    5.40
 -19 -14   0    0.30    4.20
  19 -14   0   -5.10    4.20
 -20  14   0   11.10    6.20
  20  14   0    1.00    5.20
  20  14   0   12.20    5.70
 -20  14   0    2.90    4.00
  20 -14   0    2.00    5.50
 -20 -14   0    6.10    6.40
 -20 -14   0    4.90    4.50
 -20  14   0    5.40    5.50
 -21  14   0   12.70    6.20
 -21 -14   0   -0.60    4.80
 -21 -14   0   -3.60    3.90
  21  14   0   -2.70    4.20
 -21  14   0    1.60    3.50
 -21  14   0   -1.30    4.20
  21 -14   0    0.00    4.80
  21  14   0   -0.50    5.20
 -22 -14   0    6.50    6.30
 -22 -14   0   16.10    5.90
 -22  14   0    3.40    4.50
  22 -14   0    4.80    4.90
  22  14   0    4.60    5.60
 -22  14   0   16.90    7.30
  22  14   0    7.10    5.40
 -22  14   0    4.30    7.10
 -23 -14   0    1.50    4.10
  23  14   0   -5.80    4.50
  23  14   0   -1.50    4.30
 -23 -14   0    1.70    6.20
 -23  14   0    8.20    6.20
  23 -14   0    5.70    5.60
 -23  14   0    4.40    4.10
   0  15   0    2.30    1.70
   0 -15   0    4.30    2.90
   0 -15   0    1.30    2.00
   0  15   0    1.80    2.30
   0 -15   0    5.30    2.90
   0 -15   0    2.70    2.60
   0  15   0    1.60    1.90
   0 -15   0    1.60    1.50
   1 -15   0    0.90    2.20
  -1 -15   0   -0.70    2.30
  -1 -15   0   -0.30    1.50
   1  15   0   -1.00    1.80
  -1 -15   0   -1.40    2.40
  -1  15   0   -0.70    2.00
  -1 -15   0    2.90    2.50
   1 -15   0   -3.90    2.20
  -1  15   0   -1.10    1.80
   1 -15   0   -0.70    2.30
   1  15   0   -0.10    1.60
  -1 -15   0   -2.40    1.70
  -1  15   0   -0.10    1.70
   1 -15   0   -0.20    1.70
   1  15   0    0.60    1.80
   2  15   0   12.70    2.90
  -2  15   0   13.00    3.60
  -2 -15   0   13.90    3.50
   2 -15   0   15.80    4.40
   2  15   0   13.70    3.30
  -2  15   0   15.40    3.50
  -2 -15   0   18.70    4.40
  -2  15   0   16.10    3.40
   2 -15   0   18.70    3.50
   2 -15   0   13.80    3.40
  -2  15   0   17.60    3.80
  -2 -15   0   20.40    4.80
   2 -15   0   17.20    4.00
   2 -15   0   12.20    4.70
  -2 -15   0   10.80    3.60
   2  15   0   19.80    3.90
  -3  15   0   -2.90    1.60
   3 -15   0    0.60    1.70
  -3 -15   0   -0.90    2.20
  -3 -15   0    0.20    2.50
   3  15   0    1.10    2.20
   3 -15   0    3.50    3.20
  -3  15   0    1.20    2.30
   3  15   0    4.70    2.50
  -3  15   0   -3.00    1.30
   3 -15   0   -2.30    1.90
  -3 -15   0   -2.50    1.80
  -3 -15   0   -2.90    2.50
   3 -15   0   -2.70    1.60
   3  15   0    0.50    1.40
   4 -15   0  360.56   18.30
   4  15   0  340.07   16.60
  -4  15   0  353.36   16.90
   4  15   0  363.86   16.50
  -4  15   0  334.37   17.50
   4 -15   0  325.27   15.80
  -4 -15   0  324.87   16.40
   4  15   0  335.97   16.70
  -4 -15   0  321.17   17.80
   4 -15   0  324.27   16.40
   4 -15   0  289.07   18.40
  -4 -15   0  330.07   18.10
  -4  15   0  317.67   15.80
  -4 -15   0  345.97   18.40
  -5  15   0    6.80    2.70
   5  15   0   -0.60    1.90
   5 -15   0   -2.10    2.90
   5 -15   0    1.50    2.50
   5  15   0    1.40    2.30
   5 -15   0    0.30    2.10
  -5 -15   0    0.90    1.80
  -5 -15   0   -1.70    2.20
   5 -15   0   -3.50    1.80
  -5 -15   0    2.00    3.70
  -5 -15   0    1.10    1.90
  -5 -15   0    3.40    2.80
   5  15   0    0.20    2.30
  -5 -15   0    1.40    2.10
  -5  15   0   -0.80    1.80
   5  15   0    3.50    2.60
   6  15   0  461.05   22.10
  -6 -15   0  459.55   23.60
   6 -15   0  495.25   21.60
   6 -15   0  469.25   23.60
  -6 -15   0  475.85   21.90
  -6 -15   0  488.45   22.00
   6 -15   0  391.56   24.60
   6 -15   0  479.95   22.60
  -6 -15   0  462.15   27.80
  -6  15   0  503.75   22.20
   6  15   0  481.25   21.70
   6  15   0  447.26   22.10
  -6  15   0  484.65   21.50
  -6 -15   0  531.05   25.30
  -6 -15   0  482.55   23.80
  -6 -15   0  488.05   21.10
   6  15   0  504.05   22.30
   7  15   0   -1.60    1.90
  -7 -15   0    1.80    2.60
  -7 -15   0   -2.80    1.60
  -7  15   0   -0.80    2.40
  -7 -15   0   -3.40    1.40
  -7 -15   0   -0.60    4.70
  -7  15   0    0.70    2.30
  -7 -15   0    4.00    2.80
   7 -15   0   -1.90    2.00
   7 -15   0   -0.30    3.90
   7 -15   0    1.70    2.90
  -7 -15   0    1.70    3.60
  -7 -15   0    1.40    2.70
   7  15   0   -1.20    2.40
   7  15   0   -1.40    2.60
   7 -15   0    0.20    2.40
  -8 -15   0   26.00    7.20
   8  15   0   18.90    4.40
   8  15   0   29.60    4.80
  -8 -15   0   15.00    4.50
   8 -15   0   22.60    5.20
  -8 -15   0   23.30    5.40
   8 -15   0   22.70    6.70
  -8 -15   0   16.90    3.80
   8 -15   0   23.80    4.60
  -8 -15   0   21.60    6.80
   8  15   0   17.60    4.00
  -8  15   0   21.90    4.40
  -8 -15   0   23.40    4.60
   8 -15   0   19.60    4.80
   9 -15   0   -0.40    2.50
  -9 -15   0   -0.60    2.20
   9 -15   0   -0.10    2.60
   9 -15   0    0.30    2.30
   9  15   0   -1.00    3.00
   9  15   0    7.70    3.20
  -9 -15   0   -1.90    2.80
  -9  15   0    2.70    2.70
  -9 -15   0   -0.60    2.20
  -9 -15   0    3.40    4.70
   9  15   0    1.00    2.70
  10 -15   0   68.09    7.60
  10 -15   0   53.79    8.10
 -10  15   0   57.09    7.80
 -10 -15   0   58.69    8.50
 -10 -15   0   63.59    9.20
 -10  15   0   56.49    7.50
 -10 -15   0   65.09   12.00
  10  15   0   53.69    7.80
  10  15   0   60.59    7.50
  10 -15   0   61.49    8.30
 -10 -15   0   67.49    7.50
 -10 -15   0   51.59    7.10
  10  15   0   61.89    7.50
  11 -15   0   -1.50    3.00
 -11 -15   0   -1.40    2.30
  11 -15   0    3.10    3.40
  11  15   0   -1.10    2.70
 -11 -15   0    1.40    2.40
  11 -15   0   -2.60    2.80
 -11 -15   0   -0.60    4.50
 -11  15   0   11.60    4.60
  11  15   0    2.70    3.80
 -11  15   0    2.60    3.20
 -11 -15   0    8.30    4.10
  11  15   0    2.40    3.30
 -11 -15   0   -3.70    3.00
 -11  15   0    0.20    2.80
 -12 -15   0  177.88   12.10
 -12 -15   0  199.88   12.50
  12 -15   0  189.38   14.10
 -12 -15   0  198.68   14.30
  12 -15   0  175.28   13.30
 -12  15   0  190.28   14.60
  12 -15   0  181.28   12.50
 -12 -15   0  206.38   17.80
 -12  15   0  180.98   13.00
  12  15   0  179.38   13.20
 -12 -15   0  172.68   13.70
  12  15   0  186.08   12.70
  12  15   0  191.58   12.50
 -12  15   0  154.18   12.10
  13 -15   0    4.30    3.90
 -13 -15   0   -5.70    2.40
 -13  15   0    0.50    3.90
  13 -15   0   -0.10    3.30
  13  15   0    3.40    3.30
 -13  15   0    0.10    3.40
  13 -15   0    0.40    3.30
 -13 -15   0   -2.90    1.50
 -13 -15   0    1.80    3.90
 -13  15   0    0.40    3.00
 -13 -15   0   -0.30    4.60
 -13 -15   0   -0.60    3.70
  13  15   0   -1.20    3.70
  14 -15   0   33.90    6.70
 -14  15   0   45.40    7.60
  14  15   0   41.30    7.90
 -14  15   0   39.00    7.30
 -14 -15   0   37.90    8.00
 -14 -15   0   44.50   10.80
 -14 -15   0   30.00    6.50
 -14  15   0   38.50    8.20
  14 -15   0   39.70    8.40
 -14 -15   0   37.50    6.50
  14  15   0   36.80    6.80
 -15  15   0    4.90    3.80
 -15 -15   0   13.00    5.70
 -15  15   0   -1.50    3.50
 -15 -15   0    4.00    3.10
  15 -15   0   -1.60    4.40
 -15 -15   0    0.60    3.50
 -15  15   0   -1.00    3.70
 -15 -15   0   -3.60    3.10
  15 -15   0   -5.00    3.20
  15  15   0   -1.10    3.40
  15  15   0   -1.40    3.60
  16 -15   0   15.10    5.80
 -16 -15   0   15.00    4.70
 -16  15   0   17.50    6.00
  16  15   0   22.80    6.60
 -16  15   0    9.70    4.50
 -16  15   0    1.30    4.20
 -16 -15   0   20.20    7.20
 -16 -15   0   15.90    5.00
 -16 -15   0    4.10    5.50
  16 -15   0   24.40    6.80
  16  15   0   18.60    5.40
 -17  15   0    1.60    4.10
 -17 -15   0    0.80    3.70
 -17 -15   0   28.30    7.10
 -17 -15   0    1.80    4.20
 -17  15   0    3.20    4.30
  17 -15   0   -8.80    4.40
  17 -15   0    3.90    4.40
  17  15   0    0.90    4.30
 -17 -15   0    0.60    2.50
  17  15   0    4.40    4.20
 -17  15   0    3.00    3.90
  18 -15   0   37.70    9.00
 -18 -15   0   31.20    8.40
  18  15   0   44.30    8.10
 -18  15   0   45.20    9.40
 -18 -15   0   48.90    8.10
 -18  15   0   37.40    7.40
 -18  15   0   62.59   10.70
  18 -15   0   57.29    9.80
  18  15   0   39.20    8.70
 -19 -15   0    2.70    5.20
  19  15   0   -3.10    3.90
 -19 -15   0   -0.30    4.10
  19  15   0   -2.00    4.00
  19 -15   0   -2.40    4.30
 -19  15   0    0.80    4.50
 -19  15   0    0.90    5.20
  19 -15   0   -3.10    4.50
 -20 -15   0   40.00    9.80
 -20  15   0   31.90    7.40
 -20 -15   0   41.20    8.20
 -20  15   0   21.40    7.80
  20 -15   0   14.20    6.50
  20  15   0   21.80    6.50
  20 -15   0   30.90    8.90
 -20  15   0   23.60    8.00
  20  15   0   22.90    7.70
 -21  15   0    3.40    4.20
  21 -15   0    4.00    5.20
  21  15   0    5.50    5.40
 -21 -15   0   -2.20    5.30
 -21  15   0   -0.20    4.00
  21 -15   0    0.20    5.00
  21  15   0    2.50    5.30
 -21 -15   0    3.10    4.50
  22  15   0   -1.80    4.80
 -22 -15   0    0.10    4.10
  22 -15   0   -7.20    3.40
  22  15   0   -0.60    4.60
  22 -15   0   -6.40    4.40
 -22  15   0    1.10    4.20
 -22 -15   0    3.90    5.30
 -22  15   0    0.30    4.20
   0 -16   0   54.69    6.40
   0  16   0   52.89    6.00
   0 -16   0   55.79    5.00
   0 -16   0   43.80    6.60
   0  16   0   56.89    6.40
   0  16   0   55.19    5.40
   0 -16   0   51.29    7.30
   0 -16   0   61.19    7.80
   1 -16   0   -6.20    1.70
  -1 -16   0    1.40    2.20
   1  16   0    1.90    2.20
   1 -16   0    0.20    2.30
   1  16   0    2.10    2.30
  -1 -16   0   -5.50    1.80
  -1 -16   0   -0.70    1.70
  -1 -16   0    0.60    2.80
  -1  16   0   -2.10    1.90
   1 -16   0    0.60    1.90
  -1  16   0    1.40    2.20
  -1  16   0    5.00    2.40
  -1 -16   0    0.40    1.60
   1 -16   0    4.50    3.50
   1 -16   0   -1.20    1.60
   1  16   0    0.10    1.80
  -2 -16   0   77.99    9.10
   2 -16   0   72.49    7.60
   2 -16   0   92.19   10.30
   2  16   0   61.89    6.70
   2  16   0   77.09    6.50
  -2 -16   0   82.59    9.00
   2 -16   0   77.29    6.20
  -2  16   0   74.59    6.80
  -2  16   0   70.19    6.20
  -2  16   0   67.99    6.70
  -2 -16   0   59.39    7.00
   2  16   0   78.89    6.30
   2 -16   0   76.09    8.90
  -2 -16   0   71.09    5.60
   2 -16   0   69.99    7.20
  -2  16   0   87.29    7.00
  -2 -16   0   83.99    7.80
  -3  16   0   -0.60    2.20
  -3 -16   0   -1.50    1.80
  -3 -16   0   -0.60    1.70
   3  16   0    1.00    2.10
   3 -16   0   -1.00    2.90
   3  16   0   -2.00    1.90
  -3 -16   0    1.40    2.60
   3 -16   0   -2.10    1.70
  -3  16   0    1.80    2.10
  -3 -16   0   -0.10    2.90
  -3  16   0    3.20    2.50
   3  16   0    4.80    2.50
   3 -16   0    5.40    3.10
  -3 -16   0    1.50    2.70
  -4 -16   0   51.29    7.50
   4  16   0   50.99    6.20
   4 -16   0   64.29    7.00
   4  16   0   56.99    5.70
   4 -16   0   44.80    7.00
  -4 -16   0   49.70    4.80
  -4 -16   0   61.49    7.00
  -4  16   0   51.49    6.10
  -4  16   0   50.39    6.40
   4  16   0   60.79    7.10
  -4 -16   0   53.29    8.00
   4 -16   0   59.79    9.00
  -4 -16   0   47.70    7.00
  -4  16   0   52.39    7.00
   4 -16   0   59.79    5.40
   5  16   0    0.50    2.00
   5 -16   0   -0.80    1.80
   5  16   0    0.00    2.20
  -5 -16   0    1.20    2.50
  -5 -16   0   -1.20    1.50
  -5  16   0   -0.50    2.20
  -5  16   0   -2.50    1.80
  -5 -16   0   -3.40    1.40
  -5  16   0   -1.10    2.80
  -5 -16   0   -0.30    2.50
  -5 -16   0    1.10    3.70
   5 -16   0   -2.10    2.10
  -5 -16   0   -0.80    2.20
   5 -16   0    1.30    3.60
   5  16   0   -0.40    2.30
   5 -16   0    0.80    1.90
  -6 -16   0  201.58   11.80
  -6 -16   0  178.98   12.70
  -6 -16   0  208.18   10.90
   6 -16   0  188.58   11.90
  -6 -16   0  190.88   16.80
   6 -16   0  163.38   12.50
  -6 -16   0  184.58   13.70
   6 -16   0  166.48   14.10
  -6  16   0  174.38   11.00
   6 -16   0  199.78   11.20
   6  16   0  186.48   11.60
   6  16   0  206.98   11.90
  -6  16   0  207.48   11.80
  -6 -16   0  204.18   11.70
  -6 -16   0  176.58   12.70
   6  16   0  176.58   11.70
   6  16   0  195.88   11.40
  -7 -16   0    2.20    4.70
  -7  16   0    2.90    2.70
  -7 -16   0    2.80    3.10
   7 -16   0    0.30    2.80
   7  16   0   -1.10    2.00
   7 -16   0    0.30    2.40
  -7  16   0   -0.10    2.20
  -7 -16   0    0.20    2.30
   7 -16   0    2.40    4.30
   7  16   0    0.60    2.70
   7 -16   0    0.50    2.40
   7  16   0   -4.60    2.50
  -7 -16   0   -1.30    1.80
  -7 -16   0    1.60    4.20
  -7 -16   0   -0.50    1.90
  -7 -16   0   -0.10    2.70
   8 -16   0   21.50    4.90
  -8 -16   0    7.50    5.60
   8 -16   0   13.90    4.60
   8 -16   0   14.30    6.10
   8  16   0   13.00    4.20
  -8 -16   0    8.60    6.10
   8  16   0   17.10    4.60
  -8 -16   0   17.80    4.00
  -8 -16   0   10.30    4.40
   8  16   0   18.80    4.30
  -8  16   0   22.20    4.50
   8 -16   0   21.80    4.10
  -8 -16   0   16.50    4.10
  -8 -16   0   23.10    5.10
  -9 -16   0    2.90    3.30
   9  16   0    4.70    3.50
  -9 -16   0   -2.30    2.60
  -9 -16   0    4.40    3.00
   9  16   0    4.80    3.50
   9 -16   0   -0.30    3.10
  -9 -16   0    6.60    5.10
   9  16   0    0.50    2.90
   9 -16   0   -2.60    2.30
  -9 -16   0   -4.10    4.80
  -9  16   0   -0.20    2.30
   9 -16   0    5.10    2.90
  -9 -16   0   -2.20    2.00
 -10  16   0   40.00    6.70
  10  16   0   52.89    7.20
 -10 -16   0   54.29    7.40
 -10  16   0   51.19    7.10
  10 -16   0   52.99    7.80
  10  16   0   41.10    6.90
 -10 -16   0   36.40    7.20
  10  16   0   50.99    6.80
  10 -16   0   40.00    7.10
 -10 -16   0   49.00    6.40
 -10 -16   0   50.99   10.80
 -10 -16   0   51.59   10.30
 -10 -16   0   32.90    7.00
  10 -16   0   49.70    7.00
 -11 -16   0   -5.60    2.00
 -11 -16   0   -0.20    2.50
  11  16   0    3.60    3.60
  11 -16   0   -3.20    2.80
 -11  16   0   -0.70    3.00
 -11 -16   0    3.00    3.50
  11 -16   0    2.20    3.10
 -11 -16   0   -0.10    3.00
  11  16   0    1.10    2.70
 -11  16   0    1.80    3.00
  11  16   0    2.80    3.50
  11 -16   0   -2.00    3.30
 -11 -16   0    5.60    5.00
 -12  16   0    4.80    3.80
 -12  16   0    9.80    3.80
  12  16   0    1.20    3.10
  12 -16   0    7.70    4.60
  12  16   0    2.90    4.00
 -12 -16   0    3.90    3.70
 -12 -16   0   16.80    7.70
 -12 -16   0   13.70    4.20
  12 -16   0    2.50    3.70
  12 -16   0   12.00    4.30
 -12 -16   0   13.50    5.00
 -12  16   0    2.60    3.90
 -12 -16   0    5.60    4.60
  12  16   0    4.80    4.30
 -13  16   0    0.80    3.10
  13 -16   0    1.50    3.60
  13 -16   0   -0.20    3.60
  13  16   0   -3.20    3.80
 -13  16   0   -3.10    3.10
 -13 -16   0    0.10    3.20
 -13 -16   0    9.10    5.80
 -13 -16   0   -6.30    2.30
 -13 -16   0    7.00    4.50
  13  16   0    4.30    3.70
 -13  16   0   -3.70    2.90
 -13 -16   0   -3.50    2.60
  13 -16   0    2.40    3.30
 -14 -16   0    3.30    5.80
  14  16   0    4.10    3.60
 -14 -16   0    9.70    4.60
 -14  16   0   -0.80    3.40
  14  16   0    1.20    4.50
 -14 -16   0    4.60    2.90
 -14 -16   0    4.40    4.00
  14 -16   0    4.40    4.50
 -14  16   0    1.80    3.40
  14 -16   0    6.80    4.60
 -14  16   0   -0.70    3.20
  14 -16   0    2.60    3.50
 -15 -16   0    0.00    3.90
  15 -16   0    1.80    4.40
  15 -16   0    0.00    3.30
 -15  16   0    0.20    3.10
  15  16   0   -4.90    3.30
  15  16   0   -3.00    3.10
  15 -16   0    3.50    4.00
 -15  16   0    2.00    3.50
 -15 -16   0   -1.50    2.70
 -15 -16   0   -0.50    5.20
 -15 -16   0   -4.10    2.90
 -15  16   0    3.70    4.20
 -16 -16   0  420.86   21.70
 -16 -16   0  383.66   23.50
  16  16   0  339.67   22.00
 -16  16   0  345.87   20.50
 -16 -16   0  339.67   20.10
 -16 -16   0  362.86   27.00
  16 -16   0  320.47   21.90
 -16  16   0  376.96   22.20
  16  16   0  333.07   19.90
 -16  16   0  367.36   23.70
  16 -16   0  347.77   20.90
  17  16   0    3.20    4.30
 -17  16   0    1.20    3.60
 -17 -16   0   -0.10    2.80
  17 -16   0    6.40    4.90
  17  16   0    7.10    5.10
 -17 -16   0   -3.60    3.50
  17 -16   0   -1.00    4.20
 -17  16   0    4.40    4.50
 -17  16   0    7.20    4.30
 -17 -16   0   -3.10    3.50
 -18  16   0   36.40    8.80
 -18  16   0   35.00    9.70
  18  16   0   22.40    6.20
  18 -16   0   24.90    6.70
 -18 -16   0   32.90    8.90
  18  16   0   31.10    8.10
 -18  16   0   24.10    6.40
 -18 -16   0   27.30    6.50
 -18 -16   0   71.09   13.00
  18 -16   0   19.70    6.90
  19 -16   0   -2.40    4.50
  19 -16   0   -3.70    4.00
 -19 -16   0    5.00    4.20
 -19  16   0    5.30    4.60
  19  16   0    0.20    3.70
  19  16   0   -3.00    4.30
 -19 -16   0   -8.00    3.60
  20  16   0   69.79   10.00
 -20  16   0   78.69   10.90
  20  16   0   59.99   11.30
 -20 -16   0   47.30   10.30
 -20 -16   0   48.60    9.20
  20 -16   0   50.49    9.60
 -20  16   0   75.09   12.60
  20 -16   0   44.50   10.20
  21  16   0   -1.70    5.20
 -21  16   0    3.90    5.20
  21 -16   0   -0.50    4.50
 -21 -16   0   -1.30    3.90
  21 -16   0   -8.60    4.90
  21  16   0    4.10    5.20
 -21 -16   0    0.00    6.10
 -21  16   0    2.30    4.50
  22  16   0    9.50    5.80
  22 -16   0   17.60    7.00
 -22  16   0   26.60    7.60
 -22  16   0   17.80    7.20
  22 -16   0   12.10    7.20
 -22 -16   0   -0.40    4.50
  22  16   0   16.70    6.90
 -22 -16   0   13.60    7.70
   0 -17   0    4.10    3.00
   0 -17   0    0.80    1.90
   0  17   0   -0.30    2.30
   0  17   0    5.00    2.40
   0 -17   0    2.70    2.80
   0 -17   0    5.30    3.00
   0 -17   0   -0.10    2.90
   0  17   0    3.60    2.40
   1 -17   0   -4.10    1.90
   1 -17   0   -3.40    1.60
  -1 -17   0    1.10    3.00
   1  17   0    0.60    2.40
   1  17   0    2.20    2.20
  -1 -17   0   -1.20    2.10
   1  17   0    2.90    2.20
   1 -17   0    0.70    2.50
  -1  17   0   -1.60    2.00
   1 -17   0    0.30    3.20
  -1 -17   0   -1.90    2.10
  -1  17   0    5.40    2.60
  -1 -17   0    0.40    2.70
   1 -17   0    3.90    2.20
  -1 -17   0    3.20    2.00
   2 -17   0    2.10    2.00
   2 -17   0   -1.00    2.50
  -2 -17   0    2.20    3.10
  -2 -17   0    2.20    3.00
  -2 -17   0    1.40    2.40
   2 -17   0    1.90    2.40
   2  17   0    5.50    2.40
   2 -17   0   -1.60    3.20
  -2  17   0    1.30    2.00
  -2  17   0    2.20    2.30
  -2 -17   0    1.90    2.40
   2  17   0   -0.90    2.10
  -2  17   0    1.30    2.20
  -2 -17   0   -0.70    1.60
   2 -17   0   -2.30    1.80
   2  17   0   -0.90    1.90
  -3 -17   0    2.90    2.50
  -3  17   0   -0.30    2.10
  -3 -17   0   -0.60    2.90
  -3 -17   0   -1.50    2.80
   3 -17   0   -0.90    2.40
   3  17   0   -3.30    1.70
   3 -17   0   -1.00    3.60
  -3 -17   0    4.40    2.10
  -3 -17   0   -1.20    2.20
   3 -17   0   -2.00    1.70
   3  17   0    0.60    2.00
  -3  17   0    0.70    2.50
  -3  17   0   -1.10    2.20
  -3  17   0   -2.00    2.00
   3  17   0    3.60    2.80
   4  17   0  375.56   17.50
  -4  17   0  385.06   18.20
  -4  17   0  344.97   18.30
   4 -17   0  286.67   19.20
  -4 -17   0  344.17   19.10
   4 -17   0  366.56   17.60
  -4 -17   0  349.77   19.70
  -4 -17   0  349.87   16.20
   4 -17   0  363.36   17.00
   4  17   0  377.76   17.90
  -4 -17   0  341.87   19.20
  -4  17   0  317.07   16.60
   4 -17   0  315.17   18.90
  -4 -17   0  323.27   17.40
   4  17   0  318.57   17.20
  -5  17   0   -0.80    1.90
  -5  17   0   -0.80    2.20
   5 -17   0    2.90    2.90
   5 -17   0   -0.70    3.30
   5  17   0   -1.50    2.10
   5 -17   0    0.10    2.30
  -5  17   0    1.80    3.00
  -5 -17   0    1.00    2.00
   5  17   0   -0.30    2.50
  -5 -17   0   -0.30    2.50
  -5 -17   0    4.60    3.90
   5  17   0    1.20    2.60
   5 -17   0    1.90    2.70
   6  17   0   12.60    3.70
  -6 -17   0   16.50    4.10
   6 -17   0   10.70    3.50
  -6 -17   0   16.70    5.60
   6  17   0   11.80    3.70
   6  17   0   10.60    4.10
  -6  17   0    1.90    3.40
  -6  17   0   10.40    3.40
  -6 -17   0   11.80    3.30
   6 -17   0   15.00    3.60
  -6  17   0   21.50    4.50
   6 -17   0   13.40    4.60
   6 -17   0   10.40    5.20
  -6 -17   0   14.40    3.50
   6  17   0   19.10    4.90
  -6 -17   0    3.70    5.00
  -6 -17   0   15.00    4.70
  -6 -17   0    6.50    3.80
  -7 -17   0   -1.30    2.00
   7  17   0   -1.40    2.60
   7  17   0   -4.70    2.30
  -7 -17   0    5.90    3.70
   7 -17   0    4.00    4.90
  -7 -17   0   -5.70    4.40
   7  17   0    3.10    3.00
  -7 -17   0   -0.50    2.70
   7 -17   0    1.50    2.20
  -7 -17   0   -4.20    2.20
  -7  17   0    0.70    2.50
  -7 -17   0   -0.50    4.70
  -7  17   0    2.00    2.50
   7 -17   0   -1.70    2.10
  -7 -17   0    2.40    2.30
   7 -17   0    2.20    3.30
   8  17   0   26.10    5.30
   8 -17   0   18.60    5.10
  -8 -17   0   21.80    7.30
   8 -17   0   17.50    4.40
  -8 -17   0   27.60    5.00
  -8  17   0   25.10    5.00
   8 -17   0   28.00    7.90
  -8 -17   0   30.20    6.10
  -8 -17   0   35.50    6.00
  -8 -17   0   16.80    6.90
   8 -17   0   22.00    5.60
   8  17   0   25.80    5.70
   8  17   0   31.00    5.70
  -8 -17   0   23.70    6.00
  -9  17   0    2.60    2.80
   9 -17   0   -2.40    2.30
  -9 -17   0   -1.50    2.70
  -9 -17   0    5.90    4.80
   9  17   0    6.50    3.40
  -9 -17   0    1.60    2.50
   9 -17   0   -1.40    2.60
   9 -17   0   -2.20    2.20
  -9 -17   0    0.40    3.30
  -9 -17   0    4.60    3.60
   9  17   0    4.70    3.50
  -9 -17   0    5.80    5.80
   9  17   0   -1.40    2.70
 -10 -17   0   41.40    7.50
 -10 -17   0   24.80    5.50
 -10  17   0   37.40    6.00
 -10 -17   0   40.10   10.80
  10  17   0   33.90    6.10
  10 -17   0   26.10    6.00
  10 -17   0   33.10    6.90
  10  17   0   26.60    6.20
  10 -17   0   30.50    5.30
 -10 -17   0   13.80    7.10
 -10 -17   0   15.40    4.30
 -10 -17   0   36.00    7.40
  10  17   0   39.90    6.30
 -11 -17   0    4.10    4.70
  11  17   0   -1.00    3.40
  11  17   0    4.50    3.80
 -11 -17   0    2.70    3.50
 -11  17   0   -0.10    2.70
  11 -17   0    1.40    3.50
 -11 -17   0   -0.70    2.90
 -11 -17   0   -1.00    5.70
  11  17   0    3.90    3.50
 -11 -17   0   -2.10    3.00
 -11 -17   0    3.40    3.00
  11 -17   0   -1.60    3.20
  11 -17   0    0.20    3.00
 -11  17   0    1.70    3.30
 -12 -17   0   26.50    5.70
  12 -17   0   35.90    6.20
  12  17   0   35.50    7.10
 -12  17   0   30.40    6.30
 -12 -17   0   31.50    7.30
  12 -17   0   35.70    6.90
 -12  17   0   34.20    6.50
 -12  17   0   47.80    9.20
  12  17   0   28.60    6.60
  12 -17   0   25.00    6.40
 -12 -17   0   39.00    6.40
  12  17   0   38.50    6.70
 -12 -17   0   32.70    7.10
 -12 -17   0   36.90   11.00
  13  17   0   -2.00    3.00
 -13 -17   0   -2.10    2.50
  13  17   0   -4.10    2.70
 -13 -17   0   -1.70    5.90
 -13  17   0   -5.20    3.90
 -13  17   0   -4.40    2.40
  13 -17   0   -4.70    2.90
 -13 -17   0    2.70    3.90
  13 -17   0    3.20    4.60
  13 -17   0    6.30    3.50
 -13  17   0   -2.10    3.00
 -13 -17   0   -1.60    2.90
  13  17   0    3.60    4.40
 -13 -17   0    1.00    3.30
 -14  17   0  110.69   13.90
 -14 -17   0  100.09   10.40
  14 -17   0   92.09   11.70
  14  17   0   86.99   11.30
 -14 -17   0   96.19   13.00
  14 -17   0  111.59   12.70
 -14  17   0  100.29   11.50
  14  17   0   88.79   10.30
 -14 -17   0   88.09   10.40
 -14 -17   0  118.89   18.30
 -14  17   0   96.49   11.10
  14 -17   0  102.29    9.70
 -15  17   0    6.00    3.90
 -15  17   0   -1.70    4.50
 -15 -17   0   -6.40    3.40
  15  17   0    0.00    3.20
 -15 -17   0    1.90    6.10
 -15 -17   0    5.00    3.40
  15 -17   0    3.10    4.20
  15 -17   0   -2.80    4.10
 -15 -17   0   -2.50    3.20
  15 -17   0    6.30    3.90
 -15  17   0   -2.30    4.00
  15  17   0   -4.80    3.60
  16 -17   0   13.70    6.20
 -16  17   0    1.00    4.00
 -16 -17   0    1.60    3.90
  16  17   0    4.90    5.20
 -16  17   0    3.30    4.70
  16  17   0    3.80    4.20
  16 -17   0    8.80    4.60
 -16 -17   0   10.80    7.40
 -16 -17   0   15.70    6.10
  16 -17   0    0.00    4.20
 -16 -17   0   14.20    5.00
 -17  17   0    2.50    3.80
  17 -17   0   -5.90    3.80
 -17  17   0   11.50    5.60
 -17 -17   0    2.90    4.70
 -17 -17   0    1.00    3.30
  17 -17   0   -1.50    3.80
  17  17   0   -0.10    5.00
  17 -17   0    2.10    4.40
  17  17   0    1.40    4.00
 -18  17   0   12.90    5.80
  18 -17   0   30.20    8.40
  18  17   0   22.00    8.10
 -18  17   0    7.20    4.80
 -18 -17   0   -1.40    5.10
 -18 -17   0   14.50    5.50
  18 -17   0   19.80    7.30
 -18 -17   0   52.09   13.20
  18  17   0   23.30    6.40
  18 -17   0   18.70    6.10
 -19  17   0    8.20    5.50
 -19  17   0   -2.10    3.60
  19 -17   0    1.40    4.50
 -19 -17   0   -2.80    3.60
  19 -17   0    0.60    4.90
  19  17   0    3.90    5.70
  19  17   0   -3.90    3.10
  19 -17   0    3.60    4.30
 -19 -17   0    2.30    4.70
  20 -17   0   91.99   12.20
  20  17   0   94.49   13.80
 -20  17   0  119.59   15.70
  20 -17   0   85.99   13.50
 -20 -17   0  111.89   12.90
 -20 -17   0  107.69   15.00
  20  17   0   97.39   12.50
 -20  17   0  101.99   12.80
 -21  17   0    3.70    5.00
  21 -17   0    0.80    4.80
  21  17   0    0.90    4.30
 -21  17   0   11.80    5.80
 -21 -17   0    1.60    4.50
  21  17   0    0.60    6.80
 -21 -17   0   -2.20    4.50
  21 -17   0   -1.10    4.80
   0  18   0  314.37   16.40
   0 -18   0  300.87   16.50
   0  18   0  303.37   16.20
   0 -18   0  313.27   18.60
   0 -18   0  354.56   16.10
   0 -18   0  339.57   18.60
   0  18   0  350.16   17.00
   0 -18   0  295.87   17.80
  -1 -18   0    4.60    2.20
  -1 -18   0    7.30    3.10
   1  18   0    0.20    2.10
   1 -18   0    1.30    2.80
   1 -18   0   -7.30    2.60
  -1 -18   0    3.80    3.30
  -1  18   0   -4.50    1.70
  -1 -18   0   -0.60    3.20
   1 -18   0    3.80    3.50
   1  18   0   -3.60    2.10
   1 -18   0   -0.80    2.30
  -1  18   0   -1.90    2.00
  -1 -18   0    1.70    3.30
   1  18   0   -3.20    2.00
   1 -18   0   -0.10    2.40
  -1  18   0   -1.80    2.20
   2  18   0  239.28   13.80
  -2 -18   0  256.77   16.00
  -2  18   0  271.37   14.80
  -2 -18   0  259.77   12.90
   2 -18   0  244.68   15.80
   2 -18   0  225.78   13.90
  -2 -18   0  238.88   13.90
   2 -18   0  256.97   13.60
   2 -18   0  265.47   16.60
   2  18   0  228.98   13.70
  -2  18   0  252.47   14.20
   2 -18   0  241.48   15.20
  -2  18   0  258.27   13.80
  -2 -18   0  305.07   16.40
   2  18   0  250.97   13.80
  -2 -18   0  236.68   15.60
   3  18   0   -2.50    2.00
   3  18   0   -0.40    2.20
  -3  18   0   -4.10    1.90
  -3 -18   0    1.60    2.50
  -3 -18   0    0.20    3.10
   3  18   0    2.20    2.80
  -3 -18   0    0.00    2.60
   3 -18   0    4.60    4.50
  -3  18   0   -0.60    2.30
  -3 -18   0    1.70    2.10
  -3  18   0   -3.70    2.00
   3 -18   0    0.20    2.00
   3 -18   0   -2.70    2.70
  -3  18   0    0.20    2.40
  -3 -18   0   -3.10    2.70
   4 -18   0   53.39    8.10
   4 -18   0   38.80    7.90
   4  18   0   53.39    7.10
  -4 -18   0   58.59    8.30
  -4  18   0   51.39    6.40
  -4 -18   0   53.29    8.10
   4  18   0   56.09    6.80
  -4 -18   0   49.99    6.70
   4 -18   0   52.29    6.90
  -4 -18   0   58.09    8.70
  -4  18   0   55.09    7.40
  -4 -18   0   66.29    5.70
   4  18   0   56.39    6.90
  -4  18   0   55.19    6.90
  -5 -18   0    1.60    3.00
   5  18   0   -5.30    2.20
  -5 -18   0    3.80    2.40
   5 -18   0    3.10    2.30
   5  18   0    2.00    3.00
  -5 -18   0    5.70    3.50
  -5  18   0   -3.60    1.80
  -5  18   0   -3.10    2.40
   5 -18   0   -0.10    2.90
  -5 -18   0    1.30    4.10
   5 -18   0   -3.30    2.20
  -5  18   0   -2.80    2.30
   5  18   0   -3.50    2.50
   5 -18   0    1.10    3.80
  -6  18   0   11.80    3.60
  -6 -18   0    6.70    4.00
   6  18   0    3.90    3.40
  -6 -18   0    7.00    3.30
  -6 -18   0   12.60    6.60
  -6  18   0    5.20    3.20
   6  18   0   11.00    4.00
  -6  18   0    1.60    3.50
  -6 -18   0   -0.30    4.40
   6 -18   0    4.90    3.30
   6 -18   0   10.70    4.40
  -6 -18   0    6.40    2.70
  -6 -18   0    3.70    3.40
   6  18   0    6.50    3.10
   6 -18   0    3.40    4.60
   6 -18   0   10.30    3.10
  -7 -18   0    0.40    2.60
   7  18   0    3.20    3.60
  -7 -18   0    2.10    4.60
  -7 -18   0    0.10    2.70
   7 -18   0   -2.40    2.80
   7  18   0   -1.60    2.70
   7  18   0   -0.90    3.10
  -7 -18   0   -5.20    2.10
   7 -18   0    0.80    4.60
  -7  18   0   -0.20    2.30
  -7  18   0    0.20    3.30
  -7 -18   0    0.00    4.20
   7 -18   0   -3.70    2.20
   7 -18   0   -2.90    2.20
  -7 -18   0   -1.80    2.20
  -7  18   0    1.10    2.70
  -7 -18   0    3.20    3.50
   8  18   0   39.00    6.60
  -8 -18   0   34.30    9.70
  -8  18   0   28.90    5.30
  -8 -18   0   28.20    5.40
   8 -18   0   31.00    8.40
   8 -18   0   43.20    5.80
  -8 -18   0   40.90    6.10
   8 -18   0   42.30    7.50
   8 -18   0   30.70    6.20
  -8 -18   0   24.30    6.60
  -8 -18   0   31.10    7.90
  -8 -18   0   37.50    7.30
   8  18   0   41.50    6.50
   8  18   0   34.80    6.40
  -9 -18   0    4.20    3.10
  -9 -18   0    9.50    4.00
   9  18   0   -0.60    3.10
  -9 -18   0    3.20    3.80
   9 -18   0    2.60    3.60
  -9 -18   0    1.60    5.40
  -9 -18   0    1.90    2.60
   9 -18   0    2.00    3.50
   9  18   0   -0.20    3.00
   9 -18   0   -4.50    2.50
  -9  18   0   -4.50    2.30
  -9 -18   0    0.10    5.50
   9  18   0   -0.30    3.20
  10 -18   0   12.70    5.00
 -10 -18   0    7.60    4.40
 -10 -18   0   11.70    4.20
  10 -18   0    9.00    4.60
  10  18   0    8.20    4.40
 -10 -18   0    8.10    4.50
  10  18   0    3.60    4.00
 -10 -18   0    9.50    5.80
  10 -18   0    9.00    3.90
 -10 -18   0    8.80    3.70
  10  18   0   10.70    4.60
 -10  18   0    6.20    3.80
 -10 -18   0    3.60    7.30
  11  18   0  -10.70    4.00
 -11 -18   0    1.60    3.80
  11  18   0    3.70    3.70
 -11 -18   0   -5.80    5.00
  11 -18   0    0.50    2.90
 -11 -18   0    5.00    4.10
  11 -18   0   -4.90    2.40
 -11  18   0    1.00    3.20
 -11 -18   0   -5.90    1.90
  11  18   0    1.20    3.50
  11 -18   0    4.10    4.10
 -11 -18   0    4.30    4.50
 -11  18   0   -3.30    3.60
 -11 -18   0   -1.90    2.80
 -12 -18   0   45.20    7.10
 -12 -18   0   55.19   13.40
  12  18   0   48.00    8.30
  12 -18   0   53.99    7.50
  12 -18   0   51.69    8.50
  12  18   0   61.49    9.00
 -12 -18   0   46.30    7.30
  12  18   0   47.80    7.60
 -12  18   0   49.50    8.30
 -12  18   0   47.80    7.60
 -12 -18   0   49.30    8.80
 -12 -18   0   48.80    8.80
 -12 -18   0   31.40    9.50
  12 -18   0   55.49    8.80
 -12  18   0   78.69   11.40
 -13 -18   0    8.90    3.60
 -13  18   0   -7.80    2.80
  13 -18   0   -2.50    2.90
  13 -18   0    1.30    4.00
 -13 -18   0   -6.50    3.10
 -13  18   0   -1.00    2.70
  13 -18   0   -2.00    2.90
  13  18   0   -1.70    3.60
 -13 -18   0   -6.10    5.50
 -13 -18   0    2.80    3.80
  13  18   0  -15.10    4.10
 -13 -18   0   -2.60    3.30
  13  18   0   -1.50    3.40
 -13  18   0  -10.20    3.00
  14  18   0    7.80    4.40
  14 -18   0    1.50    3.40
 -14  18   0    9.10    5.80
  14 -18   0    4.80    3.40
  14  18   0   -1.60    3.90
  14 -18   0   -3.50    3.30
 -14 -18   0   -0.20    3.30
 -14 -18   0    6.50    6.80
 -14 -18   0    2.50    3.80
 -14 -18   0   10.20    5.30
 -14  18   0    2.70    4.00
 -14 -18   0   -1.40    3.80
 -15 -18   0   -3.50    3.20
 -15 -18   0    5.50    5.10
  15  18   0    5.70    5.10
  15 -18   0   14.30    4.90
 -15 -18   0   -5.30    2.60
  15 -18   0    7.10    5.40
  15  18   0   -0.80    3.20
 -15 -18   0   20.30    6.90
 -15  18   0    7.20    4.40
 -15  18   0   -3.60    3.60
  15 -18   0    5.50    5.20
 -16 -18   0   88.89   10.80
  16  18   0   94.69   11.20
 -16  18   0   81.69   12.60
 -16 -18   0  137.49   17.00
  16 -18   0   67.19   10.60
  16 -18   0  107.49   13.70
 -16 -18   0   77.09   12.10
 -16  18   0   68.19    9.90
  16  18   0   88.19   12.00
 -16 -18   0   70.99   10.80
  16 -18   0   62.29    9.30
 -17 -18   0   -4.20    4.20
 -17  18   0   15.80    6.30
  17  18   0   -1.70    3.50
  17  18   0   -1.30    4.90
 -17 -18   0   -0.30    3.30
  17 -18   0    2.70    3.80
  17 -18   0   -5.50    3.20
 -17  18   0    4.40    4.50
  17 -18   0   -6.50    2.50
  18 -18   0   -3.70    3.40
 -18 -18   0    6.30    5.90
  18 -18   0   -6.60    3.70
 -18  18   0   -3.70    3.20
  18  18   0    1.50    4.20
  18  18   0   -6.60    3.70
  18 -18   0   -0.60    3.60
 -18 -18   0   -2.60    3.50
 -18  18   0   -5.20    3.40
 -19  18   0   -0.20    4.60
  19 -18   0    0.90    4.90
 -19  18   0    1.30    4.30
 -19 -18   0   -2.60    4.10
  19 -18   0    2.60    5.30
  19  18   0    1.50    4.30
  19  18   0    0.90    5.10
 -19 -18   0    0.00    5.00
  19 -18   0    6.70    5.00
  20 -18   0   15.40    7.80
  20  18   0   37.00    9.70
 -20  18   0   28.90    7.50
 -20  18   0   56.09   11.30
 -20 -18   0   33.70    7.80
  20 -18   0   34.10    7.40
 -20 -18   0   26.30    8.90
  20 -18   0   25.00    8.00
  20  18   0   14.90    6.50
   0 -19   0    0.40    3.70
   0 -19   0    2.20    2.80
   0 -19   0   -1.10    2.20
   0 -19   0    0.40    3.20
   0  19   0    2.80    2.90
   0 -19   0    6.90    4.20
   0  19   0   -2.30    2.40
   0  19   0    5.80    3.10
  -1 -19   0    2.00    3.50
  -1  19   0    1.90    2.90
   1  19   0    3.70    3.10
   1 -19   0   -4.00    1.70
  -1  19   0    2.10    2.50
   1 -19   0   -1.00    3.80
   1 -19   0    2.70    3.50
  -1 -19   0    6.10    2.70
  -1 -19   0   -3.90    2.90
   1 -19   0   -0.90    2.90
  -1 -19   0    4.70    3.70
  -1  19   0    2.00    2.40
   1  19   0    0.30    2.30
   1  19   0    7.70    3.10
  -1 -19   0    5.90    3.20
   1 -19   0    1.70    2.80
   2 -19   0   27.10    4.80
  -2  19   0   22.50    4.60
  -2  19   0   24.90    4.90
  -2 -19   0   26.80    5.10
  -2 -19   0   24.00    5.70
   2 -19   0   23.50    4.90
   2 -19   0   22.60    5.80
  -2 -19   0   30.40    6.30
   2  19   0   29.00    5.40
  -2 -19   0   29.10    4.60
   2  19   0   29.20    4.80
  -2  19   0   21.30    4.70
   2  19   0   22.40    4.50
  -2 -19   0   31.10    6.60
   2 -19   0   18.70    6.00
   3 -19   0    3.20    4.10
  -3 -19   0    3.20    3.60
   3  19   0    1.30    2.40
  -3 -19   0    1.40    2.60
  -3  19   0    0.90    2.90
  -3 -19   0    5.10    3.40
  -3 -19   0    3.00    3.10
   3  19   0    0.30    2.70
   3  19   0    0.60    3.00
  -3 -19   0   -0.10    2.10
   3 -19   0   -1.80    1.90
  -3  19   0   -1.80    2.40
  -3  19   0    5.30    3.60
   3 -19   0    0.10    3.10
  -4  19   0    2.20    2.50
  -4  19   0    0.70    3.00
  -4 -19   0   -1.40    3.50
   4 -19   0    0.00    2.50
   4  19   0   -1.50    2.70
   4  19   0    1.40    3.00
   4 -19   0   -1.20    3.00
  -4 -19   0   -3.70    2.50
  -4 -19   0   -4.80    2.30
  -4 -19   0    0.10    2.70
   4 -19   0    3.20    4.00
  -4  19   0   -2.10    2.20
   4  19   0   -2.50    2.40
  -4 -19   0    3.50    2.30
  -4  19   0    4.20    2.80
  -5  19   0    2.40    3.30
  -5 -19   0    3.90    4.20
   5 -19   0   -5.00    4.00
   5 -19   0    1.00    2.60
  -5 -19   0   -2.30    2.00
   5 -19   0   -0.20    2.20
  -5 -19   0   -2.90    2.40
   5 -19   0    1.50    3.70
   5  19   0   -5.30    2.20
  -5 -19   0   -3.90    2.10
   5  19   0   -1.60    2.50
  -5  19   0    2.00    2.60
   5  19   0   -2.10    2.60
  -5  19   0    1.70    3.00
  -6 -19   0   12.20    7.40
  -6 -19   0    7.30    4.10
   6 -19   0   12.40    3.60
  -6 -19   0   10.10    3.80
   6 -19   0   18.10    4.50
   6 -19   0   17.50    5.30
  -6 -19   0   11.90    5.60
   6  19   0   17.80    4.70
  -6  19   0    0.70    3.40
  -6 -19   0   12.30    3.60
   6  19   0   19.10    4.60
   6 -19   0   11.80    5.90
   6  19   0   12.90    4.70
  -6  19   0   16.60    4.40
  -6  19   0   14.50    4.20
  -6 -19   0   18.30    5.50
  -7 -19   0   -2.60    2.60
  -7  19   0    0.60    2.50
  -7 -19   0   -6.30    1.80
   7 -19   0   -4.40    2.10
  -7 -19   0    3.00    4.90
   7 -19   0    3.60    2.70
  -7  19   0   -1.70    2.40
  -7 -19   0    4.30    3.60
  -7  19   0   -0.30    4.00
   7  19   0   -1.20    3.20
  -7 -19   0    0.50    2.90
   7 -19   0   -0.10    4.30
  -7 -19   0   -3.50    3.70
   7 -19   0   -2.20    2.70
   7  19   0   -1.20    3.30
   8 -19   0   40.40    9.40
  -8 -19   0   40.50    6.50
   8 -19   0   32.90    5.60
  -8 -19   0   37.50    7.60
  -8  19   0   57.29    9.00
   8 -19   0   49.50    7.20
   8 -19   0   30.30    7.00
   8  19   0   39.90    6.60
  -8 -19   0   36.10    7.80
  -8 -19   0   33.40    5.90
  -8 -19   0   31.30    8.10
   8  19   0   53.79    7.30
  -8  19   0   57.89    7.30
   8  19   0   32.50    6.50
  -8 -19   0   41.30   10.90
   9 -19   0    0.80    3.00
   9  19   0   -0.60    3.20
  -9 -19   0   -2.90    5.20
   9 -19   0    3.20    3.80
  -9 -19   0   -8.20    3.60
   9  19   0    0.00    3.00
  -9 -19   0   -0.50    2.70
  -9  19   0   10.60    3.80
  -9 -19   0   -1.00    2.50
   9 -19   0    5.90    2.90
  -9 -19   0    1.10    3.60
   9  19   0   -8.40    3.00
  -9 -19   0    3.50    2.90
 -10 -19   0    4.00    6.70
  10  19   0   -0.80    3.90
  10  19   0   -2.90    3.20
  10 -19   0   -4.60    2.70
 -10 -19   0   -3.20    2.20
 -10 -19   0   -0.20    3.00
 -10 -19   0    1.70    3.50
 -10 -19   0    0.30    5.60
  10 -19   0    0.50    3.30
 -10 -19   0   -2.80    3.60
  10 -19   0   -3.80    2.30
 -10  19   0   -3.20    2.60
  10  19   0   -0.30    3.50
 -11 -19   0    4.10    4.20
  11  19   0   -2.10    3.00
 -11 -19   0   -3.30    5.70
 -11 -19   0   -1.40    2.70
 -11  19   0    5.20    3.40
 -11 -19   0   -2.20    5.10
 -11 -19   0    6.00    4.20
  11 -19   0    0.80    2.80
  11 -19   0   -3.80    3.40
  11 -19   0    2.70    3.90
 -11 -19   0    0.10    3.30
  11  19   0   -5.70    4.40
  11  19   0    6.70    4.40
 -11  19   0    0.30    3.50
  12  19   0  115.09   10.00
 -12 -19   0   68.49   12.80
 -12 -19   0   90.99   10.50
  12  19   0   85.99   10.20
  12 -19   0   82.09    9.30
  12 -19   0   93.59   11.50
  12 -19   0   83.89   11.30
 -12 -19   0  116.89   18.20
 -12 -19   0   82.79   11.20
 -12  19   0   88.29   11.00
 -12  19   0  136.99   13.00
  12  19   0   64.29    9.60
 -12 -19   0   89.39   11.90
 -12 -19   0   96.39   10.20
 -13 -19   0   -1.70    4.50
  13 -19   0   -8.70    2.30
  13 -19   0    9.80    3.90
 -13 -19   0   -0.40    3.20
 -13 -19   0   -3.00    6.10
  13  19   0    0.80    3.70
 -13  19   0    1.30    3.60
 -13 -19   0    3.20    4.50
 -13 -19   0   -0.30    2.90
  13 -19   0   -2.40    3.30
  13  19   0    4.50    4.70
 -13  19   0    0.50    4.30
  14 -19   0   25.60    5.90
 -14 -19   0   39.90   12.60
 -14  19   0   36.70    7.50
  14 -19   0   18.00    6.20
 -14 -19   0   24.20    5.70
 -14 -19   0   22.60    6.70
  14  19   0   23.80    7.00
 -14  19   0   14.00    6.10
 -14 -19   0   21.90    7.70
  14 -19   0   28.20    7.50
 -14 -19   0   40.40    7.50
 -14 -19   0    8.70    8.30
  14  19   0   24.20    6.20
 -15 -19   0    3.70    6.90
 -15  19   0   -4.60    3.30
 -15  19   0    0.90    4.30
  15 -19   0   -3.90    2.80
 -15 -19   0    3.00    3.10
 -15 -19   0   -0.80    3.30
 -15 -19   0    0.30    4.30
  15  19   0    7.20    5.30
  15  19   0   -0.30    3.60
  15 -19   0    2.20    3.80
  15 -19   0    6.90    5.20
  16 -19   0   73.99   11.40
  16  19   0   92.79   12.40
 -16  19   0  100.39   12.00
 -16 -19   0   65.29    9.70
  16 -19   0   82.99   10.50
 -16 -19   0  145.79   23.10
 -16 -19   0   92.69   13.50
  16 -19   0   97.19   12.70
 -16  19   0   89.89   13.30
  16  19   0   94.89   11.40
 -17 -19   0   -2.00    4.30
  17 -19   0   -1.00    3.70
 -17  19   0    7.10    5.60
 -17 -19   0    1.00    4.30
  17  19   0    2.40    4.00
  17 -19   0    4.70    3.90
 -17  19   0    3.50    4.50
  17 -19   0    0.00    5.20
  17  19   0    3.50    5.00
  18  19   0   12.20    5.90
  18 -19   0   11.80    6.20
 -18 -19   0   25.00    8.20
  18 -19   0   19.20    7.50
  18 -19   0   18.60    5.50
 -18  19   0   14.40    6.20
 -18 -19   0   15.00    5.50
 -18  19   0   -2.80    4.60
  18  19   0   25.20    7.70
  19 -19   0    4.50    5.00
  19  19   0  -11.30    2.90
  19 -19   0   -3.40    4.00
 -19 -19   0   -2.20    5.70
  19 -19   0    3.10    5.90
 -19  19   0    1.50    4.30
  19  19   0   -7.10    2.90
 -19  19   0  -10.10    3.50
 -19 -19   0    4.80    4.50
  20 -19   0   40.40    9.40
  20 -19   0   37.20    9.60
 -20 -19   0   34.00    9.30
  20 -19   0   44.30    9.30
 -20 -19   0   45.50    8.40
 -20  19   0   38.00    8.20
  20  19   0   42.80    8.50
  20  19   0   44.50   10.30
 -20  19   0   57.49   12.20
   0 -20   0  124.09   10.90
   0 -20   0  100.99    7.80
   0  20   0   94.79    8.00
   0 -20   0   92.39   11.40
   0  20   0   97.99    8.40
   0 -20   0   93.59    9.50
   0  20   0   82.99    7.90
   0 -20   0   89.89    9.40
  -1  20   0    1.00    2.80
  -1  20   0    1.40    3.00
   1  20   0    2.20    2.70
   1 -20   0    0.70    4.10
   1 -20   0    2.30    2.80
   1 -20   0   -2.30    2.70
   1  20   0    0.50    2.70
  -1 -20   0    0.00    3.10
   1 -20   0    0.10    3.00
   1 -20   0    5.30    3.70
  -1 -20   0    3.80    4.00
  -1 -20   0   -4.90    2.50
  -1 -20   0    1.10    3.00
  -1 -20   0   -0.30    2.20
  -1  20   0    6.10    3.20
   1  20   0    2.30    2.60
  -2  20   0    2.40    3.60
  -2 -20   0    9.30    4.70
   2  20   0   16.50    4.30
   2 -20   0   26.50    6.50
  -2 -20   0   18.60    5.70
   2 -20   0    9.60    3.80
   2  20   0   10.60    3.80
  -2 -20   0   24.30    4.30
  -2  20   0   14.80    4.40
   2 -20   0   13.80    5.60
   2  20   0   22.20    5.00
  -2 -20   0   12.70    5.00
  -2  20   0   11.70    3.70
  -2 -20   0   14.80    4.70
  -3  20   0    3.20    3.20
   3  20   0    0.30    3.00
   3 -20   0   -2.10    2.60
  -3 -20   0   -7.00    2.60
   3  20   0   -0.20    3.00
  -3  20   0    2.10    2.80
   3 -20   0    2.80    2.70
   3  20   0    1.10    2.50
   3 -20   0    0.20    4.10
  -3 -20   0    1.40    2.80
  -3  20   0    1.90    3.40
  -3 -20   0    7.20    4.10
  -3 -20   0    4.20    2.50
  -3 -20   0    4.70    3.90
  -4 -20   0   29.40    4.80
  -4  20   0   15.50    4.50
   4  20   0   19.70    5.00
  -4 -20   0   18.80    4.70
  -4 -20   0   22.40    5.80
   4 -20   0   19.80    6.40
  -4  20   0   16.40    4.60
   4  20   0   17.00    4.50
  -4  20   0   22.40    5.10
  -4 -20   0   25.50    6.10
   4 -20   0   23.40    4.90
   4  20   0   17.30    4.40
  -4 -20   0   12.60    5.10
   4 -20   0   12.90    5.40
  -5 -20   0   -2.70    3.50
   5 -20   0   -3.50    2.40
   5  20   0   -2.50    2.80
   5  20   0   -1.20    2.40
  -5 -20   0   -5.90    2.50
   5 -20   0    0.30    4.60
  -5 -20   0    1.10    2.10
  -5 -20   0    0.90    2.80
  -5  20   0   -1.90    3.00
  -5 -20   0   -5.00    2.30
  -5  20   0    0.20    2.60
  -5  20   0    8.50    3.30
   5 -20   0   -1.70    3.00
   5  20   0    1.90    3.10
   6 -20   0   20.80    5.00
   6 -20   0   22.00    4.60
  -6  20   0   20.10    5.00
   6  20   0   26.90    5.70
   6 -20   0   15.80    5.60
  -6 -20   0    8.50    5.10
  -6 -20   0   25.60    6.50
   6 -20   0   16.20    9.30
  -6 -20   0   13.40    3.80
  -6  20   0   15.70    4.40
  -6 -20   0   27.60    9.30
   6  20   0   12.70    4.60
  -6  20   0   27.20    6.50
  -6 -20   0   17.30    6.00
   6  20   0   24.60    5.40
  -6 -20   0   16.50    4.80
  -7  20   0   -1.30    3.50
   7 -20   0    2.10    3.70
   7  20   0    4.00    3.50
   7 -20   0    2.50    2.50
   7  20   0   -0.60    3.40
  -7 -20   0   -3.80    2.30
  -7  20   0    1.10    2.70
   7 -20   0   -4.60    2.40
  -7 -20   0   -0.10    2.40
  -7 -20   0    0.80    3.30
  -7  20   0    0.70    2.90
  -7 -20   0   -5.30    2.40
  -7 -20   0    3.50    5.40
  -7 -20   0   -1.40    3.80
  -8 -20   0   78.09   10.60
  -8 -20   0   65.79   10.10
   8 -20   0   89.19   10.00
  -8 -20   0  104.09   17.70
   8  20   0  109.89    9.40
  -8 -20   0   85.29    9.60
   8 -20   0   77.69    7.50
   8 -20   0   93.59   11.50
  -8 -20   0   79.59   11.70
   8  20   0   74.89    9.40
  -8 -20   0   87.69    9.60
  -8  20   0   75.29   10.50
  -8  20   0   79.59    8.90
  -9 -20   0   -3.00    3.90
  -9 -20   0    0.80    2.90
   9 -20   0   -0.20    2.50
  -9  20   0   -3.00    2.70
   9  20   0    2.30    3.20
   9  20   0   -2.20    3.40
   9  20   0   -5.10    3.30
  -9 -20   0   -2.00    5.50
  -9  20   0   -5.10    3.90
  -9 -20   0    1.50    3.90
  -9 -20   0    0.20    3.10
   9 -20   0    2.20    3.00
   9 -20   0   -0.60    3.60
  -9 -20   0   -0.10    3.10
 -10 -20   0   17.60    5.00
  10  20   0   14.60    5.90
  10 -20   0   14.80    4.90
 -10 -20   0   10.70    5.40
 -10 -20   0   23.10    5.10
 -10 -20   0    9.00    6.70
  10  20   0   18.60    5.40
 -10 -20   0   32.30   10.50
  10 -20   0   16.40    5.70
  10 -20   0   18.80    4.70
 -10 -20   0   18.60    6.00
  10  20   0    7.20    4.70
  11 -20   0    4.00    4.40
 -11 -20   0   -2.90    2.80
  11  20   0   -1.30    4.00
 -11 -20   0    2.30    4.50
 -11 -20   0    6.20    4.20
 -11 -20   0    1.10    6.20
 -11 -20   0   -3.20    2.90
 -11  20   0    1.40    4.20
 -11 -20   0    5.70    6.60
  11  20   0    0.40    3.80
  11 -20   0   -3.00    3.00
  12 -20   0  196.98   16.00
  12 -20   0  216.08   14.10
 -12 -20   0  205.08   14.20
 -12 -20   0  257.27   22.30
 -12 -20   0  208.98   14.50
  12 -20   0  238.38   16.60
  12  20   0  236.58   16.00
  12  20   0  205.08   14.40
 -12 -20   0  225.98   17.00
 -12 -20   0  196.28   18.70
 -12  20   0  261.77   18.50
 -12  20   0  197.48   15.30
 -12 -20   0  207.78   16.60
  13  20   0    2.60    4.30
 -13 -20   0   -3.00    3.90
 -13 -20   0    0.20    3.10
 -13 -20   0   -5.80    5.20
 -13 -20   0   -8.00    3.00
 -13 -20   0    5.50    4.60
  13 -20   0   -1.70    2.60
  13 -20   0   -5.90    2.90
 -13  20   0    5.90    4.40
 -13 -20   0   -9.50    4.20
 -13  20   0    4.60    4.00
  13  20   0   -4.20    3.20
  13 -20   0    4.30    4.70
  14 -20   0   40.10    6.70
 -14  20   0   35.60    7.60
  14 -20   0   38.50    8.10
  14  20   0   36.50    7.10
 -14  20   0   32.00    9.00
 -14 -20   0   41.30    9.10
  14 -20   0   28.60    7.70
 -14 -20   0   37.90    8.50
 -14 -20   0   26.50    6.60
 -14 -20   0   72.29   16.20
 -14 -20   0   16.10    9.60
  14  20   0   35.50    7.90
 -14 -20   0   18.10    5.60
 -15 -20   0    3.90    4.40
  15 -20   0   -2.60    3.50
 -15 -20   0    2.30    7.80
 -15  20   0   -1.90    3.60
  15  20   0   -1.40    3.90
  15 -20   0   -0.80    3.90
 -15 -20   0   -3.90    3.30
  15  20   0   -0.20    3.70
 -15  20   0    0.90    4.50
  15 -20   0   -8.00    3.70
  16  20   0    1.50    4.20
 -16  20   0    1.30    4.20
 -16  20   0    1.40    3.70
 -16 -20   0   11.20    8.00
  16  20   0   -4.80    4.50
 -16 -20   0   -4.70    6.60
  16 -20   0    1.70    3.80
 -16 -20   0    7.60    5.00
  16 -20   0   -4.10    4.20
 -16 -20   0  -11.90    4.00
  16 -20   0    6.30    5.60
 -17  20   0    1.90    5.50
 -17 -20   0    3.40    8.70
 -17  20   0   -4.20    3.80
  17 -20   0    0.10    3.90
  17  20   0   -5.50    3.70
 -17 -20   0    0.00    3.70
 -17 -20   0   -1.70    4.10
  17  20   0    6.30    5.20
  17 -20   0    0.30    4.90
  17 -20   0    1.30    4.50
 -17 -20   0   17.70    9.00
  18  20   0   -1.60    4.30
 -18  20   0   -8.20    3.00
 -18 -20   0    6.10    5.70
  18 -20   0    7.30    5.50
 -18  20   0   10.00    5.30
 -18 -20   0    1.50    4.80
  18 -20   0    3.60    5.20
 -18 -20   0    9.80    8.50
  18 -20   0   -0.40    4.30
  18  20   0    6.90    5.60
 -19  20   0    3.80    4.70
 -19 -20   0  -10.40    3.30
 -19  20   0   -1.00    5.30
  19  20   0   -5.20    3.80
 -19 -20   0   -8.10    8.40
  19  20   0   -3.20    4.60
  19 -20   0   -1.60    4.90
  19 -20   0   -4.10    4.20
 -19 -20   0    9.10    5.50
  19 -20   0   10.60    5.20
   0 -21   0   -0.50    3.80
   0  21   0   -2.50    2.80
   0 -21   0    3.10    2.50
   0 -21   0    1.70    3.10
   0  21   0   -2.70    2.30
   0 -21   0   -1.10    3.20
   0 -21   0    4.30    4.00
   0  21   0   -0.40    2.50
  -1  21   0   -2.60    2.60
  -1  21   0   -5.10    2.60
   1  21   0    0.20    2.80
  -1 -21   0    1.10    2.70
  -1 -21   0   -0.70    3.50
   1 -21   0    4.50    3.90
   1 -21   0    3.90    2.80
  -1 -21   0    2.00    2.20
   1 -21   0   -3.70    3.10
  -1 -21   0   -1.70    2.80
   1  21   0    2.90    2.90
   1 -21   0    1.20    2.90
   1  21   0    3.00    3.30
   1 -21   0    0.80    4.60
  -1  21   0   -4.10    1.80
  -1 -21   0    1.30    3.40
  -2 -21   0    2.50    3.60
  -2 -21   0    0.60    3.40
   2  21   0    1.00    3.20
  -2 -21   0    2.60    3.60
   2  21   0   -0.40    3.00
  -2  21   0    1.90    2.90
   2 -21   0   -2.30    3.30
  -2 -21   0    1.20    2.40
  -2  21   0    4.20    3.00
   2  21   0    1.70    2.80
   2 -21   0   -2.70    2.60
  -2  21   0   -1.30    2.50
  -2 -21   0    3.10    3.30
  -3  21   0   -4.60    1.80
   3  21   0   -1.60    2.40
   3 -21   0    0.90    2.90
   3 -21   0   -1.10    3.00
  -3 -21   0    4.80    2.30
  -3 -21   0    2.50    3.70
  -3 -21   0   -2.40    2.60
   3  21   0    0.60    2.70
   3  21   0    5.80    3.50
  -3  21   0   -3.40    2.40
  -3  21   0    4.50    3.30
  -3 -21   0    7.80    4.30
  -3 -21   0    3.30    4.00
  -4  21   0    3.40    3.20
  -4 -21   0   11.70    5.00
  -4  21   0    2.10    3.60
   4 -21   0    4.80    4.40
  -4 -21   0   13.00    3.50
  -4  21   0    6.60    4.70
  -4 -21   0    8.80    4.90
   4  21   0    2.70    3.60
  -4 -21   0    6.20    3.50
   4  21   0    3.90    3.50
  -4 -21   0    9.90    4.80
   4 -21   0    9.30    3.70
   4  21   0    6.70    3.60
   5  21   0   -2.00    2.70
   5 -21   0   -3.00    2.80
  -5 -21   0   -0.30    3.60
  -5 -21   0   -1.70    3.20
  -5 -21   0    2.40    2.70
   5 -21   0   -3.00    2.30
  -5  21   0   -0.80    3.00
  -5  21   0   -5.00    2.00
  -5 -21   0   -3.70    3.00
  -5  21   0   -4.70    2.40
  -5 -21   0    0.70    3.00
   5  21   0   -2.00    2.60
  -5 -21   0   -5.10    4.00
  -6  21   0   16.80    5.10
  -6 -21   0   28.60    9.70
   6  21   0   25.00    5.30
  -6 -21   0   26.60    6.50
   6  21   0   16.70    5.50
  -6 -21   0   25.30    5.70
  -6 -21   0   19.30    4.30
  -6 -21   0   19.50    5.60
  -6  21   0   12.50    4.40
  -6 -21   0   31.60    7.30
   6 -21   0   22.90    6.40
   6 -21   0   23.70    5.30
   6  21   0   20.60    5.40
  -6  21   0   12.40    4.20
   7  21   0    3.20    4.00
  -7 -21   0   -4.10    2.90
   7  21   0   -4.30    2.40
  -7 -21   0   -0.70    3.60
  -7  21   0    1.70    3.70
  -7 -21   0    0.80    4.20
  -7 -21   0   -2.10    2.80
  -7  21   0   -4.40    2.40
  -7 -21   0    2.40    5.70
   7 -21   0    1.60    3.60
  -7  21   0   -1.80    2.90
   7 -21   0    1.30    2.90
   7 -21   0    2.60    4.00
   8 -21   0   47.90    6.60
   8  21   0   44.00    7.40
  -8 -21   0   56.19   10.10
  -8  21   0   51.59    8.90
   8 -21   0   45.10    8.90
  -8 -21   0   47.20   13.20
  -8 -21   0   32.20    6.70
  -8 -21   0   57.59    9.90
  -8 -21   0   61.59    9.90
  -8  21   0   58.49    7.80
   8  21   0   64.69    8.60
   8 -21   0   56.19    8.50
  -9 -21   0    0.40    3.00
  -9 -21   0   -1.50    2.80
   9 -21   0   -3.20    3.00
   9  21   0    0.70    3.10
  -9  21   0   -5.30    4.60
  -9 -21   0    4.40    4.60
   9 -21   0   -2.50    2.30
   9 -21   0    3.80    4.30
  -9 -21   0    0.50    4.60
  -9 -21   0    2.10    5.60
   9  21   0    0.00    3.30
  -9 -21   0   -1.30    2.90
  10 -21   0   26.20    6.10
 -10 -21   0   21.10    5.60
 -10 -21   0   22.80    8.00
 -10 -21   0   24.90    5.30
 -10 -21   0   26.20    7.40
 -10 -21   0   33.00   11.40
  10 -21   0   18.80    6.00
  10  21   0   20.90    6.10
  10  21   0   24.00    6.50
 -10 -21   0   27.70    7.60
 -10  21   0   18.20    6.90
  10 -21   0   33.60    5.80
 -11 -21   0   -1.70    3.90
 -11  21   0   -4.10    3.80
 -11 -21   0    0.10    3.00
  11  21   0   -1.10    3.60
  11 -21   0    3.50    4.20
  11  21   0    7.90    4.60
 -11 -21   0    6.20    7.50
 -11 -21   0    4.80    4.90
  11 -21   0    3.90    4.50
 -11 -21   0    2.20    6.10
 -11 -21   0    2.00    3.20
 -12 -21   0    9.30    4.90
 -12 -21   0   26.00    7.10
  12  21   0   35.20    7.60
  12 -21   0   25.60    7.10
 -12 -21   0   23.20    8.30
  12 -21   0   32.70    5.80
  12  21   0   23.60    6.20
 -12 -21   0   32.80    6.40
 -12 -21   0   38.80   11.90
 -12  21   0   20.00    6.70
 -12 -21   0   22.80    7.50
  12 -21   0   18.70    6.30
  13 -21   0    3.90    4.70
 -13 -21   0    2.20    4.00
 -13 -21   0    4.30    6.50
  13  21   0   -4.60    3.40
 -13 -21   0   -2.70    6.20
 -13 -21   0   -2.20    3.50
 -13  21   0   -3.00    3.10
  13 -21   0   -4.50    3.50
 -13 -21   0   -1.50    3.00
 -13 -21   0    9.80    4.20
  13  21   0    2.00    4.20
 -13  21   0   16.60    5.90
 -14 -21   0  113.39   17.10
  14  21   0  137.79   12.20
 -14 -21   0  141.19   16.30
  14 -21   0  122.29   10.80
 -14 -21   0  128.79   11.60
 -14 -21   0  169.88   19.40
  14  21   0  164.98   13.70
  14 -21   0  160.68   13.80
 -14  21   0  125.69   13.70
  14 -21   0  124.89   15.00
 -14 -21   0  185.48   15.40
 -14  21   0  124.39   15.80
  15 -21   0    1.70    4.30
  15 -21   0   -3.30    4.20
 -15 -21   0   -5.10    4.00
 -15 -21   0    1.70    7.20
 -15 -21   0    7.30    4.60
 -15 -21   0   19.40    8.60
  15 -21   0   -5.30    3.30
  15  21   0   -4.10    3.50
 -15  21   0    7.70    4.90
  15  21   0    1.50    4.40
 -15  21   0   -0.50    3.80
 -16 -21   0   31.90   10.50
  16  21   0   11.90    6.30
  16 -21   0    3.80    5.20
  16  21   0    9.20    5.00
  16 -21   0   14.80    7.00
 -16 -21   0   20.90    7.20
 -16 -21   0    9.10    5.30
 -16  21   0    7.10    5.60
  16 -21   0    1.20    4.10
 -16 -21   0   -5.50    6.00
 -16  21   0    2.20    4.70
 -17  21   0   -5.00    3.50
 -17 -21   0    0.50    8.10
 -17 -21   0   -6.40    3.60
 -17  21   0   -2.60    4.50
 -17 -21   0   28.80    9.10
 -17 -21   0    9.00    5.80
  17 -21   0   -3.60    3.50
  17 -21   0   -4.20    4.00
  17  21   0   -9.30    3.90
  17 -21   0   -1.80    4.60
  17  21   0    0.50    4.40
  18 -21   0   88.49   11.20
  18 -21   0   63.19   11.30
 -18  21   0   83.89   11.70
 -18 -21   0   57.69   11.30
 -18 -21   0   72.79   10.90
 -18 -21   0   83.29   16.30
 -18  21   0   77.89   13.40
  18 -21   0   80.39   12.60
  18  21   0   78.69   11.00
  18  21   0   80.29   12.20
   0  22   0   23.30    5.50
   0  22   0   26.10    5.20
   0 -22   0   33.50    6.90
   0  22   0   30.50    5.80
   0 -22   0   26.30    7.00
   0 -22   0   28.60    5.20
   0 -22   0   27.40    6.00
   1  22   0   -2.30    3.00
   1 -22   0   -2.10    2.20
   1  22   0    0.30    2.70
  -1 -22   0    5.30    4.20
  -1 -22   0   -0.40    3.60
   1 -22   0    1.70    3.40
  -1 -22   0   -1.00    2.10
   1 -22   0    1.70    3.30
  -1  22   0    1.10    3.90
  -1 -22   0    0.50    3.30
  -1  22   0   -2.10    2.40
   1  22   0    2.50    3.00
   1 -22   0   -4.80    2.90
  -1  22   0   -0.10    3.30
  -2 -22   0   47.90    8.80
   2 -22   0   61.49   10.00
   2  22   0   54.89    7.60
   2  22   0   59.89    8.00
   2 -22   0   59.29    7.60
  -2  22   0   55.99    7.40
  -2  22   0   68.69    8.40
  -2 -22   0   73.19   10.10
  -2 -22   0   60.09    8.20
   2  22   0   64.09    8.30
  -2 -22   0   65.99    9.70
  -2 -22   0   58.09    6.80
  -3 -22   0   -2.00    2.20
   3 -22   0    1.40    3.70
  -3 -22   0    1.40    3.30
   3  22   0   -2.30    2.90
  -3  22   0    4.00    3.40
   3  22   0   -0.10    3.60
   3 -22   0   -0.70    2.60
   3  22   0   -3.70    2.10
  -3  22   0   -0.90    2.70
  -3 -22   0   -2.90    3.50
  -3 -22   0    5.40    4.30
  -3 -22   0    3.40    3.40
  -4 -22   0   -1.80    3.60
   4  22   0    2.70    3.50
   4 -22   0    2.10    3.80
  -4 -22   0   -2.70    2.60
  -4  22   0   -3.20    2.70
   4  22   0   -3.30    3.10
  -4 -22   0    0.20    3.30
  -4 -22   0    7.40    4.70
  -4 -22   0    3.20    3.60
  -4  22   0    0.60    2.90
   4 -22   0    9.80    3.90
   4  22   0   -2.00    2.70
   5 -22   0    5.30    4.60
  -5 -22   0   -1.90    3.00
  -5  22   0    3.50    3.30
   5  22   0   -8.10    3.00
   5 -22   0    1.30    2.80
  -5 -22   0   -1.40    3.50
  -5 -22   0   -1.50    3.30
  -5  22   0   -6.80    2.50
  -5 -22   0    5.70    6.80
  -5 -22   0    4.70    4.00
   5  22   0   -1.50    3.00
  -6 -22   0   26.60    9.70
  -6 -22   0    4.40    4.60
  -6  22   0   12.20    5.00
   6  22   0   -0.90    4.90
  -6  22   0    7.50    4.00
  -6 -22   0    8.80    5.50
   6 -22   0   10.00    5.40
  -6 -22   0   10.40    4.20
   6  22   0    5.80    3.50
  -6  22   0   17.50    4.90
  -6 -22   0   13.00    5.40
   6 -22   0    9.60    4.10
  -7 -22   0   -1.80    3.40
   7  22   0    0.30    3.20
  -7  22   0    2.00    3.40
  -7 -22   0   -5.50    3.10
   7 -22   0    2.90    4.50
  -7 -22   0    1.80    6.50
   7  22   0    8.30    4.60
  -7 -22   0    0.90    3.50
  -7 -22   0    5.70    5.50
  -7  22   0   -2.20    4.50
   7 -22   0    1.30    3.40
  -8  22   0   24.40    6.70
   8  22   0    7.00    4.90
  -8 -22   0   17.80    5.20
   8 -22   0   15.20    6.10
   8  22   0   23.50    5.80
  -8 -22   0   14.20    5.60
  -8 -22   0   21.00    6.30
  -8 -22   0    6.20    9.10
   8 -22   0    7.80    4.70
   8 -22   0   15.50    4.10
  -8 -22   0   22.50    7.50
  -9 -22   0   -5.80    3.10
   9 -22   0   -3.50    2.60
   9  22   0    0.00    3.70
   9 -22   0   -4.40    3.50
   9 -22   0    2.70    3.70
  -9 -22   0    3.80    5.50
  -9 -22   0   16.70    8.50
  -9  22   0   -5.60    3.10
  -9 -22   0   -6.00    2.60
  -9 -22   0    6.80    5.10
 -10 -22   0   10.20    6.40
 -10  22   0   22.40    7.20
 -10 -22   0   28.50    8.20
  10  22   0   23.10    6.50
  10 -22   0   19.40    5.70
  10 -22   0   16.40    4.60
 -10 -22   0   37.90   12.50
 -10 -22   0   21.50    6.00
 -10 -22   0   19.20    5.20
 -10 -22   0   29.20    6.40
  10 -22   0   26.00    7.30
 -11 -22   0   -0.70    2.70
 -11 -22   0    5.50    5.00
 -11  22   0   -0.10    5.10
 -11 -22   0   -1.60    4.00
 -11 -22   0   -5.70    5.10
  11  22   0   -1.60    3.70
 -11  22   0   -1.00    4.00
 -11 -22   0    2.00    4.10
  11  22   0    2.70    4.20
  11 -22   0    6.90    3.50
  11 -22   0   -2.90    3.50
  11 -22   0   -1.50    3.70
 -11 -22   0   -7.60    5.50
 -12  22   0    9.70    5.60
 -12 -22   0   15.50    5.70
 -12 -22   0   14.90    9.10
  12 -22   0   10.40    5.90
  12  22   0    4.30    5.00
  12 -22   0    6.20    4.40
 -12 -22   0   10.10    4.20
 -12 -22   0   12.80    4.90
 -12 -22   0    4.60    5.60
 -12 -22   0    6.80    6.70
  12  22   0   10.20    5.30
  12 -22   0    0.20    4.30
  13  22   0    3.50    4.50
 -13 -22   0   -8.30    5.00
 -13 -22   0   -6.30    3.30
  13 -22   0    1.20    3.30
 -13 -22   0   -0.80    4.20
  13 -22   0   -7.30    4.10
 -13 -22   0   -1.80    3.60
  13  22   0    3.90    4.50
 -13  22   0   -2.80    3.90
  13 -22   0   -3.90    3.60
 -13  22   0    8.90    5.50
 -13 -22   0    2.40    9.80
  14  22   0   51.99    9.00
 -14  22   0   51.29    9.50
 -14  22   0   49.20   10.40
 -14 -22   0   42.20    8.10
 -14 -22   0   24.70    7.90
 -14 -22   0   48.40    9.90
  14 -22   0   37.80    8.80
  14 -22   0   39.70    8.30
  14 -22   0   27.60    7.00
 -14 -22   0   45.20   11.30
 -14 -22   0   61.79   14.60
  14  22   0   32.80    8.00
  15 -22   0   -2.00    3.90
  15 -22   0   -5.30    3.30
 -15 -22   0    0.50    4.30
 -15 -22   0    6.30    5.10
 -15 -22   0    6.00    7.40
 -15  22   0    2.30    4.20
  15  22   0   -1.80    4.10
 -15 -22   0    0.50    5.10
  15 -22   0   -5.30    3.80
 -15  22   0    2.30    4.00
 -15 -22   0   -2.10    6.50
  15  22   0    7.20    5.60
 -16 -22   0   28.80   11.00
 -16 -22   0   39.60   12.10
 -16 -22   0   16.90    6.20
  16 -22   0   28.10    7.80
  16 -22   0   11.70    4.90
  16  22   0   17.10    6.50
 -16  22   0    5.10    5.00
  16 -22   0   20.90    7.50
  16  22   0   21.80    7.70
 -16 -22   0   30.40    8.30
 -16  22   0   31.10    8.70
  17 -22   0   -1.60    3.80
 -17  22   0   -8.20    2.30
 -17 -22   0    7.00    5.60
 -17 -22   0   -0.80    6.40
  17  22   0   -0.70    4.60
  17 -22   0   -7.00    3.60
 -17 -22   0   23.70   11.30
 -17  22   0    8.40    5.60
  17  22   0   -8.40    3.90
  17 -22   0    0.20    4.80
 -17 -22   0   -1.30    3.80
   0 -23   0    3.60    4.70
   0 -23   0    5.10    3.60
   0  23   0    1.90    3.20
   0  23   0   -2.50    2.80
   0 -23   0   -1.60    3.00
   0 -23   0    7.80    3.10
  -1 -23   0    3.50    3.70
  -1  23   0   -2.30    2.90
  -1 -23   0   -2.00    3.50
  -1  23   0   -6.10    2.60
   1 -23   0   -1.40    3.60
  -1 -23   0    0.60    3.50
   1 -23   0    8.30    3.50
   1  23   0    0.70    3.00
  -1 -23   0    2.10    2.60
   1  23   0   -0.70    2.90
   1 -23   0    0.90    3.10
   2  23   0  117.89   10.00
  -2 -23   0  101.99    8.30
  -2 -23   0   97.49   10.60
  -2  23   0  103.49    9.10
   2 -23   0  109.99   13.60
  -2 -23   0   96.39   12.00
  -2 -23   0   92.99   12.50
  -2  23   0  124.69   10.40
   2  23   0  115.49   10.10
   2 -23   0  112.09    9.00
  -3 -23   0   -0.70    3.30
   3 -23   0    2.60    2.80
   3  23   0   -4.50    3.50
   3  23   0    1.80    3.10
  -3 -23   0   -5.40    3.00
  -3  23   0   -1.50    2.60
   3 -23   0   -1.70    3.90
  -3  23   0   -3.60    2.90
   4 -23   0   19.70    6.60
  -4 -23   0   51.79    8.70
  -4 -23   0   33.60    7.90
  -4  23   0   37.70    7.00
  -4  23   0   39.10    6.80
   4  23   0   28.10    7.30
   4  23   0   32.70    6.30
  -4 -23   0   31.20    7.60
  -4 -23   0   44.50    7.30
   4 -23   0   32.10    6.00
  -5  23   0    1.00    3.10
  -5 -23   0   -0.50    2.80
  -5 -23   0    1.20    6.90
   5 -23   0   -1.70    2.40
  -5  23   0    1.30    3.30
   5  23   0   -6.20    3.90
   5 -23   0   -2.80    3.70
  -5 -23   0   -3.10    3.40
  -5 -23   0   -1.40    3.80
   5  23   0    3.20    3.60
  -5 -23   0   -0.50    4.20
  -6 -23   0   -0.20    3.50
  -6 -23   0    7.50    5.30
  -6  23   0    6.50    3.70
  -6  23   0    2.10    3.90
  -6 -23   0   -2.70    3.60
   6 -23   0    1.80    4.50
   6  23   0   -1.40    3.90
   6 -23   0    4.50    3.50
   6  23   0    4.50    4.20
  -6 -23   0   -5.00    2.70
  -6 -23   0    5.00    7.70
  -7 -23   0   -4.70    2.80
  -7  23   0   -2.30    3.70
   7 -23   0   -4.80    2.70
   7 -23   0   -4.90    3.10
  -7  23   0   -2.70    2.90
  -7 -23   0    1.80    4.30
  -7 -23   0   -3.70    3.70
   7  23   0   -1.80    3.20
  -7 -23   0    3.60    6.50
  -7 -23   0    0.90    3.20
  -8 -23   0    9.20    6.20
   8 -23   0    3.10    3.60
   8 -23   0    2.60    4.90
   8  23   0    3.60    4.10
  -8 -23   0    8.80    4.50
  -8 -23   0    9.60    5.30
  -8  23   0    0.40    4.10
  -8 -23   0    6.50    5.00
   9 -23   0   -5.90    3.30
   9 -23   0   -8.20    3.10
  -9  23   0    4.40    4.30
  -9 -23   0    1.50    5.10
  -9 -23   0    8.50    8.00
   9 -23   0    7.90    3.60
  -9 -23   0    2.40    4.30
  -9 -23   0   -4.60    2.60
  -9 -23   0   -2.70    3.20
   9  23   0    4.30    4.30
  10 -23   0    3.40    4.10
 -10 -23   0   17.30   10.30
 -10  23   0    4.70    5.80
 -10 -23   0   -3.80    4.00
  10  23   0    2.90    4.50
 -10 -23   0    7.30    6.60
  10 -23   0    1.10    3.30
  10 -23   0    4.20    4.60
 -10 -23   0    0.10    3.20
 -10 -23   0   -6.80    3.00
 -11 -23   0   -0.50    3.60
 -11  23   0    2.10    3.90
  11 -23   0   -2.30    2.90
  11 -23   0    0.50    5.20
  11 -23   0   -6.70    2.50
 -11 -23   0    2.70    4.90
  11  23   0   -6.10    3.60
 -11 -23   0   -1.70    3.20
 -11 -23   0    7.40    6.30
 -11  23   0   -1.20    5.70
 -11 -23   0    9.90    8.90
 -11 -23   0    3.00    4.40
 -12 -23   0   67.89   12.80
 -12  23   0   64.29   10.50
 -12 -23   0   65.49    9.20
  12  23   0   76.19   10.80
  12 -23   0   71.29   11.80
 -12 -23   0   40.90    9.30
  12  23   0   64.99   10.40
  12 -23   0   59.29    8.20
  12 -23   0   60.69    9.90
 -12 -23   0  145.39   22.00
 -12  23   0   56.69   11.20
 -12 -23   0   57.09   10.80
  13  23   0   -1.70    4.20
 -13  23   0   14.40    6.80
  13 -23   0   -0.30    4.60
 -13 -23   0   -4.40    3.50
 -13 -23   0   -6.30    5.40
 -13 -23   0    8.70    9.50
 -13 -23   0   -1.30    3.80
  13  23   0   -5.20    3.70
 -13 -23   0    1.20    4.10
  13 -23   0    1.30    4.40
  13 -23   0    2.10    4.00
 -13  23   0   -0.40    3.80
 -13  23   0   -6.20    5.10
  14  23   0   57.79   10.30
 -14  23   0   70.19   11.10
  14  23   0   74.69   10.40
 -14  23   0   92.19   13.40
  14 -23   0   82.59    9.90
 -14 -23   0   93.29   11.80
 -14 -23   0   58.19   13.10
 -14 -23   0   85.49   12.90
  14 -23   0   81.59   12.50
 -14 -23   0   90.19   13.70
  14 -23   0   68.39   11.10
 -14 -23   0  130.69   23.50
 -15 -23   0    1.50    4.60
  15  23   0   -8.80    3.50
 -15  23   0    0.70    4.60
 -15  23   0   -0.50    5.40
  15 -23   0   -3.70    4.30
 -15 -23   0    2.70    4.80
  15  23   0   -0.90    4.20
 -15 -23   0    0.90    5.90
  15 -23   0    7.50    6.40
 -15 -23   0   19.50    9.90
  15 -23   0   -1.30    3.90
 -15 -23   0    4.40    6.20
 -16 -23   0   -3.70    4.20
  16 -23   0   -9.10    3.80
  16  23   0   -0.60    4.70
 -16  23   0   -0.50    4.00
 -16  23   0   -3.20    3.20
  16 -23   0   10.80    5.70
 -16 -23   0  -10.90    6.40
 -16 -23   0   28.00   10.60
 -16 -23   0    2.90    6.20
  16  23   0   -6.40    4.30
  16 -23   0   -4.10    3.90
   0  24   0   55.39    7.70
   0 -24   0   63.19    7.40
   0 -24   0   51.49    9.20
   0 -24   0   70.49    9.30
   0  24   0   62.49    8.60
   0 -24   0   68.49   10.70
   1 -24   0   -6.40    2.00
  -1 -24   0    4.40    4.30
  -1 -24   0    2.10    4.20
  -1  24   0   -3.90    2.80
   1  24   0    2.70    3.80
   1 -24   0    1.40    4.90
  -1 -24   0    2.50    3.20
  -1  24   0    2.10    3.50
   1  24   0   -1.20    2.50
   2 -24   0   98.09   13.10
  -2  24   0  117.39   10.70
  -2 -24   0  141.59   12.70
   2  24   0  102.59   11.00
  -2 -24   0  105.99   11.30
  -2 -24   0  107.99   13.90
   2 -24   0  115.39    9.60
  -2  24   0   96.59   10.60
   2  24   0  123.49   11.00
   3  24   0   -5.20    4.30
  -3 -24   0   -2.20    3.20
  -3  24   0   -4.30    2.30
  -3  24   0    1.70    3.10
   3  24   0   -5.00    3.00
   3 -24   0   -3.10    3.50
  -3 -24   0   -2.30    3.50
  -3 -24   0   -3.40    4.30
   3 -24   0   -0.20    2.50
  -4 -24   0   32.90    6.60
   4  24   0   42.30    8.50
   4 -24   0   28.80    5.70
  -4  24   0   52.49    7.80
  -4  24   0   28.60    6.10
   4  24   0   30.00    6.30
  -4 -24   0   34.90    8.30
  -4 -24   0   40.00    8.80
   4 -24   0   22.70    7.00
  -5 -24   0    1.00    6.70
  -5 -24   0    0.60    4.10
  -5  24   0    1.20    3.20
   5 -24   0    1.20    4.20
   5 -24   0    9.80    3.90
  -5 -24   0    0.60    4.10
   5  24   0   -0.40    4.50
  -5  24   0   -2.60    3.20
  -5 -24   0    2.00    4.00
   5  24   0    3.40    3.80
  -6 -24   0    4.80    7.80
   6  24   0    1.90    3.30
   6 -24   0    0.00    3.10
  -6  24   0    1.60    3.60
   6 -24   0   -2.60    3.70
  -6 -24   0    2.40    4.60
  -6 -24   0    1.90    3.50
  -6  24   0    2.00    3.50
  -6 -24   0   -0.70    4.60
  -6 -24   0    3.70    4.80
  -7  24   0    1.70    3.20
   7 -24   0    0.50    3.20
  -7 -24   0   -8.40    5.80
   7 -24   0   -3.60    3.40
  -7  24   0   -1.80    3.50
  -7 -24   0    7.60    4.70
   7  24   0   -7.90    3.20
  -7 -24   0   -5.20    2.50
  -7 -24   0   -1.80    3.70
  -7 -24   0   -2.40    4.10
  -8  24   0   59.09    9.70
   8 -24   0   52.99   10.20
  -8 -24   0   62.79   10.60
  -8 -24   0   50.29    8.40
   8 -24   0   36.90    7.70
   8  24   0   47.70    8.20
  -8 -24   0   68.79   16.70
  -8 -24   0   48.30    9.40
  -8 -24   0   35.20    8.50
   9  24   0    3.10    4.10
  -9 -24   0   -2.40    4.20
  -9  24   0    3.70    5.60
   9 -24   0    4.50    3.60
  -9 -24   0    7.90    5.80
   9 -24   0    2.50    5.30
  -9 -24   0    4.10    5.30
  -9 -24   0    8.80    8.90
  -9 -24   0   -0.50    4.10
  10  24   0   54.49    8.90
  10 -24   0   51.09    9.00
 -10  24   0   52.09   10.30
 -10 -24   0   54.79    8.80
 -10 -24   0   45.00   10.00
 -10 -24   0   40.80    9.30
  10 -24   0   55.69    7.70
 -10 -24   0   59.19   11.10
 -10 -24   0  113.49   21.40
  10 -24   0   48.80    9.90
 -11  24   0   -1.70    5.10
 -11 -24   0   -1.60    4.20
  11 -24   0   -0.10    3.30
 -11  24   0    4.20    4.80
 -11 -24   0    5.40    5.30
 -11 -24   0   -5.00    7.30
  11 -24   0   -8.80    2.70
 -11 -24   0   -0.80    5.30
  11  24   0    7.10    5.30
  11 -24   0    7.80    5.20
 -11 -24   0   -5.90    3.80
  12  24   0   12.00    5.40
 -12 -24   0   14.10    6.60
 -12  24   0   12.00    7.30
 -12 -24   0    9.40    5.50
  12 -24   0   10.30    5.50
 -12 -24   0    7.50    6.80
  12 -24   0    7.80    5.70
 -12 -24   0   15.70    5.60
 -12 -24   0   26.10   10.40
  12 -24   0    6.30    4.10
 -12  24   0    9.00    5.70
 -13  24   0    2.20    6.30
  13 -24   0   -3.30    5.00
 -13  24   0   -5.00    3.40
  13 -24   0    0.30    4.30
 -13 -24   0   -8.70    2.40
  13  24   0    6.40    4.70
  13 -24   0   -1.00    3.50
 -13  24   0    8.20    6.30
 -13 -24   0    3.50    9.60
 -13 -24   0   -0.40    4.00
 -13 -24   0    7.20    4.80
 -13 -24   0    7.10    6.90
 -14 -24   0   -2.90    4.50
  14  24   0   -4.40    4.20
 -14  24   0   -5.10    6.40
 -14 -24   0   -0.20    6.80
 -14 -24   0   -2.50    5.70
 -14 -24   0    2.40    4.80
  14  24   0   -7.50    4.10
  14 -24   0    5.00    3.90
 -14  24   0   14.60    6.30
  14 -24   0   -0.70    4.10
  14 -24   0    3.40    5.50
 -14 -24   0   10.50    5.20
 -15  24   0    1.20    6.50
 -15  24   0   -6.30    2.70
  15  24   0   -4.30    4.30
  15 -24   0    0.80    4.70
  15  24   0    1.30    5.00
 -15 -24   0    3.30    4.80
 -15 -24   0   -2.20    4.80
 -15 -24   0   -4.00    3.70
  15 -24   0   -5.40    3.90
 -15 -24   0    9.90    8.30
 -15  24   0   -6.40    3.60
 -15 -24   0   23.10   10.40
   0  25   0   -3.60    2.70
   0 -25   0    4.00    4.70
   0  25   0   -5.30    3.60
   0 -25   0    2.20    4.10
   0 -25   0    1.00    3.30
  -1 -25   0    7.40    5.70
   1  25   0    3.60    4.00
  -1 -25   0   -3.50    3.10
  -1  25   0   -1.70    3.20
  -1 -25   0   -1.20    3.30
   1 -25   0    5.50    5.00
   1  25   0    5.10    4.40
  -1  25   0   -4.90    2.30
   1 -25   0   -4.40    2.90
   2 -25   0   17.00    7.00
  -2  25   0   26.60    6.70
  -2 -25   0   27.90    6.40
  -2 -25   0   18.20    6.90
  -2  25   0   31.90    6.70
  -2 -25   0   31.20    8.00
   2  25   0   18.30    5.50
   2  25   0   33.60    7.90
   2 -25   0   29.90    5.80
  -3 -25   0   -0.50    3.60
   3  25   0   -2.60    3.10
   3 -25   0   -3.90    3.90
   3  25   0  -11.30    4.30
   3 -25   0    2.50    3.10
  -3  25   0    7.40    4.50
  -3  25   0   -2.30    2.90
  -3 -25   0    4.10    4.90
  -3 -25   0    4.10    4.20
   4  25   0   -5.20    4.80
   4 -25   0   -3.40    3.90
   4 -25   0   -2.30    3.30
  -4  25   0    0.10    4.30
  -4  25   0   -6.20    2.50
   4  25   0   -3.40    3.10
  -4 -25   0   -0.20    3.40
  -4 -25   0    1.40    4.60
  -4 -25   0   -4.80    3.80
   5  25   0   -4.90    2.60
   5 -25   0    1.40    4.70
  -5  25   0    6.20    4.00
  -5 -25   0   -3.30    3.80
  -5  25   0   -6.30    3.40
  -5 -25   0   -0.90    7.00
  -5 -25   0   -3.10    3.80
  -5 -25   0    2.70    4.10
   5 -25   0   -3.70    2.60
  -6 -25   0   58.99    9.10
  -6 -25   0  123.09   21.50
  -6  25   0   75.49    9.30
  -6 -25   0   62.79   11.00
   6 -25   0   61.49   10.80
   6  25   0   60.89    9.00
  -6  25   0   82.19   11.00
   6 -25   0   83.89    9.80
  -6 -25   0   79.39   12.20
  -7 -25   0    1.10    5.60
  -7 -25   0   -2.60    4.30
  -7 -25   0    5.50    8.10
  -7 -25   0    5.10    4.60
  -7  25   0   -2.20    3.00
   7  25   0   -4.20    2.80
  -7  25   0   -5.00    3.70
   7 -25   0    2.00    4.70
   7 -25   0   -1.80    3.00
   8 -25   0   90.39   10.90
  -8  25   0   91.19   12.80
  -8 -25   0  108.59   20.40
   8  25   0   77.49   10.40
  -8 -25   0   88.09   16.60
   8 -25   0   88.29   12.80
  -8 -25   0   87.19   12.50
  -8 -25   0   73.49   10.50
  -8 -25   0   89.79   13.40
   9 -25   0    2.90    5.40
  -9 -25   0   -5.60    3.30
  -9  25   0    4.20    5.00
  -9 -25   0   -0.60    4.60
  -9 -25   0    4.80    9.40
  -9 -25   0   -4.90    3.90
   9 -25   0   -2.90    3.60
   9  25   0   -6.10    3.10
  -9 -25   0   -1.50    3.90
 -10 -25   0   24.00   13.60
 -10 -25   0   16.00    7.20
 -10 -25   0   17.50    7.10
  10 -25   0   17.90    6.10
 -10 -25   0   17.10    5.60
  10 -25   0   30.60    8.50
 -10 -25   0   11.10    6.90
  10  25   0   17.70    6.10
 -10  25   0   10.10    6.60
 -11  25   0    7.10    6.20
 -11 -25   0    0.20    4.10
  11 -25   0    1.40    5.40
 -11 -25   0    7.20    5.00
  11  25   0    1.60    4.70
 -11 -25   0   -5.00    2.80
 -11 -25   0    4.30    9.20
 -11 -25   0    4.80    6.20
 -11  25   0    3.10    4.10
  11 -25   0    8.50    4.50
  11 -25   0    3.70    3.10
 -12  25   0   12.50    5.70
 -12 -25   0    4.20    6.00
  12  25   0    3.10    4.50
 -12 -25   0   18.80    8.00
 -12 -25   0    8.00    4.90
  12 -25   0   -0.20    4.80
 -12 -25   0   25.90   11.80
 -12 -25   0    3.40    4.90
  12 -25   0    8.90    4.00
 -12  25   0   19.60    8.00
  12 -25   0   -0.40    4.60
  13 -25   0   -4.10    4.00
 -13  25   0    8.50    5.90
  13  25   0   -6.00    3.90
  13 -25   0    7.40    4.00
  13 -25   0    1.60    5.50
 -13 -25   0    0.00    5.80
 -13 -25   0   20.80   11.50
 -13  25   0   -0.50    4.50
 -13  25   0    6.10    7.10
 -13 -25   0   -3.40    6.10
 -13 -25   0   -4.10    3.90
 -13 -25   0   -6.50    3.60
 -14 -25   0   -9.50    9.80
 -14  25   0    2.10    4.00
 -14 -25   0    1.40    5.50
  14 -25   0   -1.20    3.30
 -14 -25   0    1.90    6.90
 -14 -25   0   -1.30    4.00
  14 -25   0    5.60    6.50
 -14  25   0    5.40    7.10
  14  25   0    1.60    4.40
  14 -25   0   -6.40    3.50
 -14 -25   0    0.40    3.60
   0  26   0   -3.80    3.00
   0  26   0    0.40    3.90
   0 -26   0   -4.30    4.00
  -1  26   0   -1.90    3.30
   1  26   0   -3.20    4.40
  -1 -26   0    8.70    4.40
   1  26   0    0.80    3.40
  -1  26   0   -6.70    2.90
   1 -26   0   -4.60    4.30
  -1 -26   0   -3.20    3.60
  -1 -26   0    4.60    4.10
  -2  26   0    0.90    3.60
  -2 -26   0    3.60    4.30
   2  26   0   17.10    6.20
   2  26   0    4.50    4.30
  -2 -26   0    0.60    3.90
  -2 -26   0    8.80    5.60
  -2  26   0   -0.70    3.30
   2 -26   0    6.70    5.70
   3  26   0   10.60    5.50
   3 -26   0    0.30    3.20
  -3  26   0   -0.20    3.00
   3  26   0   -3.00    3.70
  -3 -26   0   -2.70    3.50
  -3  26   0    2.50    4.20
  -3 -26   0    5.00    4.00
  -3 -26   0   -7.40    3.50
   3 -26   0    7.10    6.20
  -4 -26   0    4.90    5.00
  -4  26   0   -2.00    3.90
   4 -26   0    2.80    4.70
  -4  26   0   -0.40    3.30
   4 -26   0   -0.10    2.90
   4  26   0   -3.00    3.70
  -4 -26   0   -2.20    4.10
  -4 -26   0    6.10    8.40
  -4 -26   0   -5.20    3.00
   5 -26   0   -1.10    4.50
  -5 -26   0   -1.60    4.40
  -5 -26   0    1.10    4.10
  -5  26   0   -1.80    3.50
   5  26   0   -4.10    2.60
  -5 -26   0    0.30    3.90
  -5  26   0    0.20    4.10
  -5 -26   0   11.40   10.00
   5 -26   0    7.50    3.80
  -6 -26   0   58.99   16.50
   6 -26   0   37.60    9.30
   6  26   0   46.70    8.40
  -6 -26   0   48.40   10.10
  -6  26   0   48.00    8.90
  -6 -26   0   38.70    7.60
  -6 -26   0   45.80    9.50
  -6  26   0   45.40    7.70
   6 -26   0   47.40    7.90
  -7 -26   0    4.00    8.50
  -7 -26   0    1.30    4.40
  -7 -26   0    1.20    4.10
   7 -26   0   10.30    5.90
   7 -26   0    5.50    4.20
  -7  26   0   -3.00    3.00
  -7 -26   0   -6.10    3.30
  -7  26   0    2.20    4.40
   7  26   0   -3.10    3.60
  -8 -26   0    6.70    4.50
  -8 -26   0   29.10   11.30
  -8  26   0   -3.80    4.30
  -8 -26   0   -0.10    4.60
  -8 -26   0    7.30    6.40
   8  26   0    4.00    4.30
   8 -26   0    2.70    3.70
   8 -26   0    4.10    5.40
   9 -26   0   -6.10    3.80
  -9 -26   0    4.00    5.20
  -9 -26   0   11.20    9.30
  -9 -26   0    8.70    5.90
  -9  26   0    2.60    6.40
   9  26   0    4.00    5.00
  -9 -26   0   -2.80    3.40
   9 -26   0   -1.00    3.90
 -10  26   0   17.70    7.10
 -10 -26   0   29.70    8.30
 -10 -26   0   26.90    7.40
  10  26   0   36.30    8.00
  10 -26   0   23.80    6.90
 -10 -26   0   54.19   17.80
 -10 -26   0   17.50    7.70
  10 -26   0   26.00    8.40
 -11 -26   0   13.90    8.20
  11  26   0    0.50    4.60
 -11  26   0   -3.90    4.00
 -11 -26   0    1.20    5.10
 -11 -26   0   -3.60    3.30
  11 -26   0   -4.40    4.00
 -11 -26   0    3.70    5.00
 -11  26   0    0.20    5.40
  11 -26   0   -0.20    5.20
 -11 -26   0  -14.10    8.50
 -12 -26   0   29.00    8.50
 -12 -26   0   23.40   13.10
 -12  26   0   21.90    9.00
  12  26   0   16.10    6.70
  12 -26   0    9.40    6.70
  12 -26   0   15.70    5.30
  12 -26   0   24.30    7.10
 -12 -26   0   15.00    7.90
 -12 -26   0   16.80    7.10
 -12  26   0   19.90    7.00
 -12 -26   0   15.20    6.10
   0 -27   0    0.50    5.00
   0  27   0    4.20    3.60
   0  27   0    0.20    5.30
  -1 -27   0    1.50    4.10
  -1 -27   0    0.40    4.90
  -1 -27   0   -4.90    4.10
   1  27   0   -2.90    2.90
  -1  27   0   -2.30    3.00
   1 -27   0    3.40    5.00
  -2  27   0   22.60    6.60
  -2 -27   0   27.10    8.30
  -2 -27   0   34.30    8.50
   2  27   0   65.29    9.80
  -2 -27   0   23.70    6.80
   2  27   0   31.00    6.70
   2 -27   0   26.40    8.10
  -2  27   0   22.00    5.90
   3 -27   0    2.80    5.50
  -3 -27   0   -2.10    4.70
   3  27   0    7.60    4.80
  -3  27   0    3.80    3.90
  -3  27   0   -1.10    3.40
  -3 -27   0   -0.30    3.90
  -3 -27   0   -5.10    3.90
   4 -27   0   43.70   10.40
  -4  27   0   29.10    7.00
   4  27   0   58.19    8.90
  -4  27   0   37.30    7.90
  -4 -27   0   55.39   10.80
  -4 -27   0   83.69   19.70
  -4 -27   0   39.70    9.50
  -4 -27   0   48.80    8.50
  -5 -27   0   19.00   12.00
  -5 -27   0   -2.30    3.80
  -5 -27   0   -1.80    3.60
   5 -27   0   -5.60    2.80
  -5 -27   0   -3.60    4.50
   5 -27   0   -1.70    4.40
  -5  27   0    1.30    4.20
  -5  27   0   -2.00    4.10
   5  27   0    1.30    4.50
   6 -27   0   48.20   10.70
  -6  27   0   40.90    7.90
   6 -27   0   61.19    8.90
  -6 -27   0   55.69   10.40
   6  27   0   42.50    8.10
  -6 -27   0   48.90   10.60
  -6 -27   0   40.10    7.90
  -6  27   0   63.49   10.20
  -6 -27   0   83.49   19.50
  -7 -27   0   -1.70    3.60
  -7 -27   0   -1.80    5.00
  -7 -27   0   -4.60    4.20
  -7  27   0    0.20    4.80
   7 -27   0    2.20    5.70
  -7  27   0    8.30    4.80
   7  27   0   -5.90    2.80
  -7 -27   0   13.80   10.70
   7 -27   0    1.60    4.00
   8 -27   0   38.90    7.60
  -8 -27   0   33.20    9.40
   8  27   0   32.20    7.50
  -8 -27   0   10.70    5.80
  -8 -27   0   48.40   16.90
  -8  27   0   35.70    9.40
   8 -27   0   30.60    9.40
  -8 -27   0   31.30    9.60
   9 -27   0   -4.70    5.10
  -9 -27   0   13.80   11.10
  -9 -27   0   -2.40    4.90
   9  27   0    2.30    4.20
  -9 -27   0   -3.90    3.60
  -9  27   0   -3.10    5.00
  -9 -27   0   -3.60    4.20
   9 -27   0   -2.40    4.00
 -10 -27   0   29.00    7.40
 -10 -27   0   32.00   15.00
 -10  27   0   42.20   10.20
 -10 -27   0   32.60    9.20
  10 -27   0   33.40    7.60
  10 -27   0   23.90    8.50
  10  27   0   30.90    8.00
 -10 -27   0   38.00    9.60
 -11 -27   0    3.20    4.30
   0 -28   0  220.58   19.20
   0  28   0  256.47   17.80
   0  28   0  204.18   15.30
  -1 -28   0    4.20    5.50
  -1  28   0    4.80    4.80
  -1 -28   0    1.90    4.50
   1 -28   0    4.60    6.10
   1  28   0   -0.60    4.00
  -1  28   0   -4.70    4.00
   2  28   0    5.40    4.20
  -2 -28   0    7.00    5.70
  -2 -28   0    3.40    5.50
  -2  28   0   -3.00    4.40
  -2 -28   0    0.60    4.40
  -2  28   0    9.60    5.10
   2 -28   0   12.70    6.60
  -3  28   0   -8.90    3.50
  -3 -28   0   -7.60    3.90
   3 -28   0   -2.60    4.60
  -3 -28   0   -0.50    3.80
  -3  28   0    1.10    4.00
   3  28   0    0.60    4.30
  -3 -28   0   -1.40    5.80
  -4  28   0   82.69   11.70
  -4 -28   0   75.69   12.20
  -4 -28   0   65.19    9.70
  -4 -28   0   79.29   21.00
  -4 -28   0   56.89   11.00
  -4  28   0   55.19    9.10
   4 -28   0   68.89   12.40
   4  28   0   51.49    8.90
   5 -28   0    3.40    5.90
  -5 -28   0   -0.70    4.60
   5  28   0    5.40    4.90
  -5  28   0    0.00    4.10
  -5 -28   0    1.20    4.00
  -5 -28   0    3.40   12.30
  -5  28   0    3.20    4.80
  -5 -28   0   -0.30    5.10
  -6 -28   0   31.20    8.90
  -6 -28   0   24.00    7.10
  -6  28   0   43.90    9.10
   6  28   0   24.10    7.00
   6 -28   0   38.80    9.70
  -6 -28   0   38.60   16.80
  -6 -28   0   32.10    9.30
  -6  28   0   40.50    7.90
  -7 -28   0   -7.50    8.50
   7 -28   0   -3.30    3.60
  -7 -28   0   -9.40    3.60
  -7 -28   0   -2.00    3.80
  -7  28   0    7.10    4.60
   7 -28   0    0.40    5.30
  -7 -28   0   -1.00    5.10
  -7  28   0    2.80    5.40
   7  28   0    3.20    4.60
  -8 -28   0   16.20    5.90
  -8 -28   0   21.10    7.90
   8 -28   0   14.40    7.10
   8  28   0   10.10    5.60
  -8 -28   0    6.10    7.40
  -8 -28   0   11.40   13.20
  -8  28   0   11.90    6.40
   8 -28   0   -2.20    3.70
   0  29   0    1.60    4.40
   0 -29   0    0.90    5.40
  -1  29   0    8.90    5.90
   1 -29   0    4.40    5.20
  -1  29   0   -2.40    3.40
   1  29   0    2.20    4.10
  -1 -29   0   -1.70    4.90
   2  29   0   -1.60    3.80
  -2  29   0   -4.80    3.70
   2 -29   0    1.60    5.60
  -2 -29   0    1.10    6.10
  -2 -29   0   -2.00    3.70
  -2  29   0  -13.30    3.70
  -2 -29   0    7.10    5.50
  -3  29   0    1.60    4.10
  -3 -29   0   -3.90    5.20
  -3 -29   0    9.40   12.60
  -3 -29   0   -5.40    3.10
  -3 -29   0    6.90    6.00
   3 -29   0    0.60    5.10
   3  29   0    2.10    4.50
  -3  29   0   -3.70    4.70
  -4 -29   0    0.10   11.40
  -4 -29   0   -5.80    3.80
   4 -29   0    5.30    5.80
  -4  29   0    0.20    4.10
   4  29   0    2.10    4.00
  -4 -29   0    3.80    4.30
  -4 -29   0    2.60    5.10
  -4  29   0   -1.60    4.80
  -5 -29   0    7.70    5.50
  -5 -29   0   -6.40   11.80
  -5 -29   0    6.40    5.30
   5 -29   0    3.00    6.60
  -5  29   0   -0.70    4.10
  -5 -29   0    3.30    5.70
  -5  29   0   -3.30    5.00
   5  29   0   -0.30    3.60
  -1   0  -1    0.10    0.20
   1   0   1   -0.10    0.20
   1   0  -1    0.10    0.10
  -1   0   1   -0.10    0.10
  -2   0  -1   -0.40    0.40
   2   0   1    0.20    0.50
  -2   0   1    0.20    0.50
   2   0  -1    0.40    0.50
  -3   0  -1   -1.40    0.60
   3   0   1    0.10    0.80
  -3   0   1    0.90    0.80
   3   0  -1   -0.60    0.70
  -3   0  -1    0.20    0.70
   4   0  -1    1.00    1.20
  -4   0   1   -0.50    0.80
   4   0   1   -1.50    0.80
  -4   0  -1    0.50    1.20
  -4   0  -1   -0.60    0.90
  -4   0   1    1.30    1.20
   5   0  -1    1.80    1.40
  -5   0   1    0.30    0.90
  -5   0  -1    1.00    1.10
  -5   0  -1    0.90    1.40
  -5   0   1    1.60    1.40
   5   0   1    1.20    1.30
  -6   0  -1   -1.20    0.90
  -6   0  -1   -0.30    1.30
  -6   0   1    1.10    1.10
  -6   0   1    1.00    1.60
   6   0   1    1.40    1.60
   6   0  -1    1.50    1.60
   7   0  -1   -0.30    1.50
  -7   0   1    1.50    1.30
   7   0   1    0.60    1.60
  -7   0  -1    0.40    1.50
  -7   0  -1    2.00    1.50
  -7   0   1    1.70    1.80
  -7   0  -1    2.80    2.00
  -8   0  -1    1.20    1.80
  -8   0  -1   -0.90    1.10
   8   0  -1   -0.40    1.70
  -8   0   1    0.90    1.80
   8   0   1    1.80    1.90
  -8   0  -1   -1.10    1.50
  -8   0   1    0.10    1.30
   8   0  -1    3.30    2.30
  -9   0   1    1.00    1.90
  -9   0  -1    2.00    1.50
   9   0   1    0.30    1.90
  -9   0   1    4.00    2.30
  -9   0   1    1.40    1.40
   9   0  -1    2.90    2.20
  -9   0  -1   -2.30    1.50
   9   0  -1    1.70    2.00
   9   0   1    1.50    2.00
  -9   0  -1   -0.60    1.60
 -10   0   1    1.20    1.40
  10   0  -1    2.40    2.50
  10   0   1    0.00    2.20
 -10   0   1    2.80    2.20
 -10   0  -1    1.60    1.90
 -10   0  -1   -1.20    2.30
 -10   0  -1    0.00    2.20
  10   0  -1   -0.90    2.00
 -11   0  -1    2.10    1.70
 -11   0  -1    0.30    1.90
  11   0  -1   -2.10    2.00
 -11   0   1    0.30    1.50
  11   0   1    1.70    2.50
  11   0  -1   -0.80    2.70
 -11   0  -1    2.90    2.40
 -11   0   1    0.40    1.80
 -12   0   1   -5.40    1.60
  12   0  -1   -1.70    2.20
  12   0  -1    1.80    2.90
  12   0   1    2.50    2.60
 -12   0   1    1.10    1.80
 -12   0  -1    3.10    2.80
 -12   0  -1   -0.20    1.50
 -12   0  -1   -1.40    1.60
  13   0  -1   -4.80    2.20
  13   0   1   -3.60    2.30
 -13   0  -1   -1.00    1.80
 -13   0   1    0.90    1.70
  13   0  -1    1.30    2.80
 -13   0   1   -1.50    1.80
 -13   0  -1   -3.70    2.00
 -13   0  -1    0.80    2.40
  14   0  -1    8.50    4.30
 -14   0  -1   -0.10    2.00
 -14   0   1    2.60    2.20
  14   0  -1   -1.80    3.00
 -14   0  -1    0.60    2.50
 -14   0   1    3.20    3.00
  14   0   1    3.90    3.30
  14   0   1    2.50    3.10
 -15   0   1    0.50    2.80
  15   0   1    5.90    3.50
  15   0  -1    4.60    3.70
 -15   0   1    0.10    2.10
  15   0  -1   -3.40    2.50
 -15   0  -1   -0.50    1.90
 -15   0  -1   -2.80    2.50
  15   0   1   -2.60    3.20
  16   0  -1    3.30    3.90
 -16   0   1   -1.90    2.30
  16   0   1    0.30    3.20
  16   0   1   -1.70    3.70
 -16   0  -1   -3.00    2.30
 -16   0  -1    0.30    2.10
 -16   0   1   -0.80    2.10
  16   0  -1   -0.60    3.70
  17   0  -1   -3.20    4.20
 -17   0   1   -4.50    2.60
  17   0  -1   -4.70    2.40
  17   0   1   -2.70    3.40
 -17   0  -1    6.00    3.40
  17   0   1   -9.10    2.90
 -17   0   1   -3.70    1.70
 -17   0  -1   -2.10    3.20
 -18   0   1   -3.20    3.30
 -18   0   1   -1.10    2.30
  18   0   1    2.90    3.90
  18   0   1   -4.50    3.20
 -18   0  -1    4.00    3.40
  18   0  -1   -1.20    4.30
 -18   0  -1    1.70    3.40
  18   0  -1   -2.40    4.00
 -19   0  -1   -3.50    2.50
 -19   0   1   -2.50    2.40
  19   0   1    2.70    3.50
  19   0   1   -4.50    4.40
 -19   0   1   -1.60    3.00
 -19   0  -1   -0.20    3.90
  19   0  -1    0.30    4.80
  19   0  -1   -1.70    3.50
  20   0   1    0.00    4.00
 -20   0  -1   -2.50    3.00
  20   0   1   -3.70    4.20
 -20   0  -1    4.50    3.50
  20   0  -1    1.30    4.70
  20   0  -1   -2.30    4.70
 -20   0   1   -4.40    2.50
 -20   0   1    0.80    3.30
  21   0   1    9.50    5.40
 -21   0  -1    0.80    4.30
  21   0   1   -1.50    4.20
  21   0  -1    0.60    4.20
 -21   0  -1    1.50    3.00
 -21   0   1    3.90    4.90
  21   0  -1   -2.70    5.10
 -21   0   1   -2.20    3.00
 -22   0   1   -9.10    3.60
 -22   0   1   -2.10    3.20
 -22   0  -1    2.70    3.70
  22   0   1   -4.00    3.60
 -22   0  -1   -8.00    3.00
  22   0   1   -1.30    5.20
  22   0  -1   -0.90    4.30
  22   0  -1    6.00    6.50
  23   0  -1    7.80    6.00
 -23   0   1    0.20    4.80
  23   0   1    7.10    5.00
  23   0  -1    3.10    5.30
  23   0   1   15.90    7.40
 -23   0  -1    5.70    4.20
 -23   0   1    1.90    3.50
 -23   0  -1   -4.30    3.40
 -24   0  -1   -0.60    3.40
 -24   0   1    5.40    4.30
  24   0   1   -0.70    5.00
  24   0  -1    1.70    5.10
  24   0   1    6.50    5.90
  24   0  -1    7.50    7.20
 -24   0   1   -0.90    4.90
 -24   0  -1    1.00    5.00
 -25   0  -1    0.40    4.20
  25   0   1   -8.20    4.50
  25   0  -1   -5.20    4.10
 -25   0  -1   -0.90    4.10
  25   0   1    7.50    6.60
 -25   0   1   -7.00    5.10
 -25   0   1   -3.40    3.40
  25   0  -1   -4.00    5.90
  26   0   1   -4.70    5.50
 -26   0  -1   -5.00    3.70
  26   0  -1   13.80    9.00
  26   0  -1   -0.40    5.50
 -26   0   1   -2.50    4.90
 -26   0   1   -5.30    3.30
  26   0   1    5.50    7.30
 -26   0  -1   -9.10    3.50
   0   1   1    0.10    0.20
   0   1   1    0.00    0.10
   0  -1  -1   -0.10    0.10
   0  -1  -1    0.00    0.10
   0   1  -1    0.00    0.10
   0  -1   1   -0.10    0.10
  -2  -1  -1  138.69    6.10
   2   1  -1  145.59    6.00
  -2   1   1  146.69    6.10
   2  -1   1  139.09    6.10
   2   1   1  138.69    6.10
  -2   1  -1  136.79    6.10
  -2  -1   1  135.79    6.00
  -3  -1  -1 1557.14   55.69
   3  -1   1 1549.74   56.19
   3   1  -1 1550.34   56.09
  -3  -1  -1 1527.85   56.09
  -3   1   1 1510.35   56.09
   3  -1  -1 1594.14   56.19
  -3   1  -1 1490.65   56.09
   3   1   1 1527.35   56.09
  -3  -1   1 1509.95   55.99
  -3   1  -1 1527.05   55.69
  -4  -1  -1  883.01   36.40
  -4   1   1  963.40   36.50
  -4  -1  -1 1014.30   35.90
   4   1  -1  960.30   36.40
   4  -1   1  972.60   36.50
  -4   1   1  996.70   35.60
  -4  -1   1  986.70   35.60
  -4   1  -1 1000.50   36.00
   4   1   1  905.51   36.50
  -4  -1   1  999.80   36.60
  -4   1  -1  981.30   36.60
   4  -1  -1  948.61   36.50
   5  -1   1  142.99    7.40
  -5   1   1  137.99    6.30
  -5  -1  -1  127.09    7.10
  -5   1   1  128.99    7.10
   5   1  -1  132.59    7.10
  -5  -1  -1  135.49    6.60
  -5   1  -1  132.49    7.20
  -5   1  -1  140.39    6.60
  -5  -1   1  135.29    6.30
  -5  -1   1  131.69    7.20
   5  -1  -1  132.59    7.20
   5   1   1  145.09    7.50
  -6  -1  -1  105.99    6.60
   6   1  -1  102.89    6.40
  -6   1   1  104.59    5.50
  -6  -1  -1  111.19    5.80
  -6   1   1  100.79    6.40
   6  -1   1  112.99    6.70
  -6   1  -1  111.59    5.80
   6  -1  -1  104.49    6.50
  -6   1  -1  101.79    6.40
  -6  -1   1  102.09    5.50
  -6  -1   1  102.39    6.40
   6   1   1  101.69    6.40
  -7  -1  -1   59.89    4.90
  -7  -1  -1   60.09    4.20
   7  -1   1   50.99    4.60
  -7  -1  -1   54.19    6.80
   7   1  -1   55.99    4.70
  -7   1   1   53.19    3.90
  -7   1   1   58.79    5.00
   7   1   1   61.09    4.90
  -7   1  -1   58.99    5.90
  -7   1  -1   56.39    4.10
   7  -1  -1   51.49    4.60
  -7  -1   1   55.69    3.90
  -7  -1   1   58.19    4.90
  -7   1  -1   51.39    4.70
  -8   1   1   35.00    4.60
  -8  -1  -1   48.60    5.30
  -8   1   1   33.90    3.50
  -8  -1  -1   33.30    4.40
   8  -1   1   32.10    4.30
   8   1  -1   33.10    4.40
  -8  -1  -1   34.80    3.80
   8   1  -1   32.80    4.50
  -8   1  -1   31.30    3.60
  -8   1  -1   23.20    3.80
  -8  -1   1   30.30    3.40
   8  -1  -1   33.20    4.40
  -8   1  -1   38.50    5.60
   8  -1  -1   36.20    4.50
   8   1   1   28.80    4.10
  -8  -1   1   33.90    4.40
   9  -1   1  221.58   11.90
  -9   1   1  205.08   10.30
   9   1  -1  229.18   11.90
  -9  -1  -1  214.68   13.40
  -9  -1  -1  226.48   12.10
   9   1  -1  203.08   11.50
  -9  -1  -1  206.58   10.50
  -9   1   1  215.78   11.90
  -9  -1   1  221.48   12.70
   9   1   1  218.08   11.50
  -9   1  -1  191.98   10.40
   9  -1  -1  218.58   11.80
   9   1   1  209.18   11.80
  -9  -1   1  205.88   10.20
  -9   1  -1  204.48   11.80
   9  -1  -1  227.88   11.70
   9  -1  -1  224.08   12.70
  -9   1  -1  224.48   13.30
  -9  -1   1  234.08   12.20
 -10  -1  -1   55.29    4.70
 -10  -1  -1   48.60    7.70
 -10   1   1   54.29    4.50
 -10   1   1   45.40    5.80
  10  -1   1   55.39    7.30
  10   1  -1   58.99    6.70
 -10  -1  -1   63.19    6.20
 -10   1  -1   53.19    5.30
  10  -1  -1   50.99    6.00
  10   1   1   58.69    6.30
 -10  -1   1   55.79    5.80
  10  -1  -1   78.19    8.60
 -10  -1   1   58.59    4.70
 -10  -1   1   70.59    6.70
 -10   1  -1   53.49    6.60
 -11  -1  -1   21.10    5.20
 -11  -1  -1   18.60    4.00
  11  -1   1   17.40    4.00
  11   1  -1   14.90    4.00
 -11  -1  -1   15.80    3.10
 -11   1   1   20.20    4.50
 -11   1   1   17.10    3.10
  11  -1   1   11.30    3.90
 -11  -1   1   17.70    4.20
  11  -1  -1   16.50    3.80
 -11   1  -1   16.70    3.10
  11   1   1   17.60    3.90
 -11  -1   1   12.60    3.60
 -11  -1   1   19.70    3.30
 -11   1  -1   20.70    4.70
  11  -1  -1   10.90    3.90
 -12  -1  -1   95.39    6.80
  12   1  -1  104.19    8.20
  12  -1   1   96.69    8.80
 -12  -1  -1  106.49    8.50
 -12   1   1  104.09    8.70
 -12  -1  -1   83.89    9.10
 -12   1   1   94.29    6.60
  12  -1   1  106.59    8.00
  12  -1  -1  100.79    9.00
  12  -1  -1   94.89    7.90
 -12   1  -1   89.79    8.10
  12   1   1  100.29    8.00
 -12  -1   1   93.79    8.10
 -12   1  -1   94.09    6.80
 -12  -1   1  106.79    8.70
 -12  -1   1  106.29    7.00
  13  -1   1   64.69    8.70
  13  -1   1   60.19    7.40
 -13  -1  -1   62.29    7.60
 -13   1   1   59.99    7.70
 -13  -1  -1   64.19    5.60
  13   1  -1   62.99    7.80
 -13   1   1   66.89    5.60
 -13  -1  -1   50.29    6.90
 -13   1  -1   51.09    7.40
  13  -1  -1   46.50    7.40
 -13  -1   1   65.19    6.90
 -13   1  -1   53.09    5.90
 -13  -1   1   58.19    5.20
 -13  -1   1   60.79    7.00
  13  -1  -1   56.99    7.30
  13   1   1   62.99    7.80
 -14   1   1   77.39    6.60
  14   1  -1   72.39    9.70
 -14   1   1   84.99    8.40
  14  -1   1   82.79   10.30
 -14  -1  -1   80.79    8.20
 -14  -1  -1   92.59    9.50
  14  -1   1   82.49    9.20
  14   1  -1   88.79    9.70
 -14  -1  -1   92.39    7.20
  14  -1  -1   95.39   10.90
 -14  -1   1   81.09    8.20
 -14   1  -1   95.29    8.80
  14   1   1   76.99    9.00
 -14   1  -1   76.59    6.80
 -14  -1   1   85.89    6.70
  14  -1  -1   98.59   10.10
  15   1  -1    1.00    3.40
 -15   1   1   -2.80    2.30
  15   1  -1    6.30    4.40
 -15   1   1    5.30    2.80
 -15  -1  -1    0.70    2.70
  15  -1   1   -3.20    2.70
 -15  -1  -1   10.20    4.20
 -15  -1  -1    7.40    3.00
  15  -1   1    5.20    3.70
  15  -1  -1    2.90    3.40
 -15   1  -1    3.70    2.80
 -15  -1   1    3.20    2.60
  15   1   1    3.50    3.30
  15  -1  -1    3.90    3.60
 -15  -1   1   12.80    4.60
 -15   1  -1    3.10    3.10
 -16   1   1   32.70    5.20
  16  -1   1   22.70    5.70
 -16  -1  -1   35.50    7.10
 -16  -1  -1   27.60    4.90
 -16   1   1   31.70    6.60
  16   1  -1   26.50    7.30
  16   1  -1   24.40    5.70
  16  -1   1   39.50    8.10
 -16   1  -1   37.50    5.60
 -16   1  -1   38.10    7.00
  16  -1  -1   19.20    6.50
  16   1   1   38.10    8.00
  16  -1  -1   26.40    6.10
 -16  -1   1   23.20    5.70
 -16  -1   1   26.90    4.80
  16   1   1   19.70    5.90
 -17   1   1   14.80    5.20
 -17   1   1    9.80    3.40
 -17  -1  -1   -1.10    2.60
  17  -1   1   10.90    4.80
  17   1  -1    9.50    4.90
  17   1  -1    6.60    4.60
 -17  -1  -1   12.40    4.90
  17  -1   1    2.10    4.40
  17  -1  -1    8.00    5.70
 -17  -1   1    7.50    4.50
 -17   1  -1    7.60    4.50
 -17  -1   1    9.30    3.60
  17   1   1    5.90    4.30
  17   1   1    1.20    4.60
 -17   1  -1    9.10    3.60
  17  -1  -1   11.10    4.90
  18   1  -1   14.60    6.60
 -18  -1  -1   11.70    5.00
 -18  -1  -1    4.70    3.30
  18   1  -1    2.10    5.00
 -18   1   1    5.60    4.60
 -18   1   1    8.20    3.30
  18  -1   1    1.00    4.90
  18  -1   1    1.60    4.10
  18  -1  -1    5.20    5.20
  18   1   1   10.80    5.50
  18  -1  -1    6.40    5.30
 -18  -1   1    0.00    2.50
  18   1   1    3.20    4.70
 -18  -1   1   11.00    5.00
 -18   1  -1    8.90    4.70
 -18   1  -1    4.10    3.20
 -19  -1  -1   17.90    5.60
 -19  -1  -1   27.70    5.80
  19   1  -1   11.10    5.40
  19  -1   1   21.50    6.90
  19  -1   1   17.30    6.10
 -19   1   1   22.80    5.00
  19   1  -1   18.60    7.30
 -19   1   1   17.10    6.30
 -19  -1   1   15.80    5.70
 -19  -1   1   25.10    5.60
  19   1   1   24.50    6.50
  19   1   1    6.80    5.50
 -19   1  -1   39.70    8.00
  19  -1  -1   23.30    6.50
 -19   1  -1   22.00    5.10
  19  -1  -1   11.00    5.70
  20  -1   1    1.70    5.90
  20  -1   1   13.30    5.70
 -20  -1  -1    7.80    5.00
 -20  -1  -1    7.80    4.20
 -20   1   1    8.40    5.40
  20   1  -1    8.10    5.80
  20   1  -1   13.00    6.10
 -20   1   1    4.60    3.60
  20   1   1    3.30    4.90
 -20   1  -1    3.60    3.30
  20   1   1    1.80    4.50
 -20  -1   1   13.80    5.80
 -20   1  -1    7.20    4.40
  20  -1  -1    6.50    5.20
 -20  -1   1    5.00    3.50
  20  -1  -1    3.10    5.40
  21  -1   1   10.00    5.30
  21   1  -1   -8.40    4.60
 -21  -1  -1    0.70    3.10
  21   1  -1   -1.40    3.70
 -21   1   1    2.40    3.50
 -21  -1  -1   -3.40    3.40
 -21   1   1   -1.50    3.90
  21  -1   1   12.20    6.20
  21   1   1    3.20    4.60
  21   1   1   -6.00    3.80
  21  -1  -1    0.60    4.20
 -21  -1   1    2.90    3.50
  21  -1  -1   11.70    5.90
 -21   1  -1    1.60    4.00
 -21   1  -1    1.50    2.90
 -21  -1   1    1.00    4.10
 -22   1   1   10.50    5.90
  22  -1   1   -8.10    4.30
  22  -1   1   -3.20    3.50
 -22   1   1    2.60    3.80
 -22  -1  -1    4.20    4.10
  22   1  -1    9.00    7.10
  22   1  -1   12.20    6.50
 -22  -1  -1    3.70    5.90
  22   1   1    7.80    6.50
 -22   1  -1    2.10    3.50
  22   1   1    6.50    5.50
  22  -1  -1   22.10    8.00
 -22   1  -1   -3.80    3.70
 -22  -1   1    4.50    3.80
 -22  -1   1    9.60    6.40
  22  -1  -1    8.70    5.80
  23  -1   1   25.50    9.20
  23   1  -1   24.00    7.80
  23  -1   1   10.70    6.60
 -23  -1  -1   11.60    5.20
 -23   1   1   26.80    6.20
 -23   1   1   29.30    8.50
 -23  -1  -1   32.40    8.40
  23   1  -1    8.80    6.50
  23   1   1    4.20    6.40
 -23  -1   1   18.00    7.50
 -23  -1   1   29.30    6.40
  23  -1  -1    8.20    6.70
 -23   1  -1   15.20    5.20
 -23   1  -1   18.90    7.00
  23  -1  -1   13.60    6.30
  23   1   1   19.60    7.60
 -24   1   1    4.40    4.20
 -24  -1  -1    0.00    3.70
  24  -1   1    2.40    5.20
  24   1  -1   -4.60    4.90
 -24   1   1    1.80    5.60
  24   1  -1   -2.60    5.90
  24  -1   1    2.40    5.90
 -24  -1   1   -0.20    3.10
 -24   1  -1   -3.60    3.00
 -24   1  -1   -2.60    4.20
  24  -1  -1   -2.10    4.70
  24  -1  -1   -0.70    6.60
  24   1   1    0.10    6.40
  24   1   1   -2.60    4.20
 -24  -1   1    2.60    5.30
  25   1  -1   13.00    7.90
 -25  -1  -1   11.80    6.10
 -25  -1  -1    8.10    4.60
  25  -1   1   -6.50    5.00
  25   1  -1   13.90    6.90
 -25   1   1   10.10    7.10
 -25   1   1    0.50    3.90
  25  -1   1   21.50    9.40
  25  -1  -1   13.30    8.10
  25   1   1    8.00    7.20
  25   1   1   19.00    7.50
 -25   1  -1   11.50    6.10
 -25  -1   1    8.60    6.40
  25  -1  -1    2.40    5.60
 -25  -1   1   15.30    5.40
 -25   1  -1   12.40    5.60
 -26  -1  -1   24.70    6.70
 -26  -1  -1   29.70    9.00
  26  -1   1   18.20    8.20
  26  -1   1    9.00    8.10
  26   1  -1   24.80    9.50
 -26   1   1   18.50    6.00
 -26   1   1   30.50    9.80
  26   1  -1   27.10   10.10
  26  -1  -1   20.20    9.20
 -26   1  -1   22.20    7.00
 -26   1  -1   15.70    6.80
  26   1   1   27.00    9.80
 -26   1  -1   25.80   11.60
  26  -1  -1   33.10   10.50
 -26  -1   1   16.80    6.10
  26   1   1   26.60    8.90
 -26  -1   1   35.50    9.40
   0   2  -1   17.40    1.30
   0  -2   1   16.60    1.30
   0   2   1   19.10    1.30
   0   2   1   20.90    1.40
   1   2  -1  234.78    9.10
   1   2  -1  226.28    8.60
  -1  -2  -1  215.48    8.90
  -1  -2  -1  236.98    9.10
  -1  -2   1  206.38    9.00
  -1  -2   1  234.98    8.60
   1   2   1  232.88    9.00
  -1   2  -1  221.88    8.90
   1   2   1  232.78    9.10
   2   2  -1   16.20    1.80
  -2  -2  -1   17.40    1.70
  -2  -2   1   17.50    1.70
   2   2   1   13.90    1.80
  -2   2  -1   16.40    1.70
  -3  -2  -1    6.80    1.30
   3   2  -1    9.50    1.70
  -3  -2  -1    6.60    1.50
   3  -2   1    6.20    1.50
  -3   2  -1    8.00    1.40
  -3   2  -1    7.00    1.50
  -3  -2   1    6.40    1.40
   3   2   1    8.30    1.60
   4   2  -1  126.39    6.50
  -4  -2  -1  128.29    6.10
   4   2  -1  119.19    6.40
  -4   2   1  131.09    5.90
   4  -2   1  130.89    6.80
  -4   2   1  126.69    6.60
  -4  -2  -1  126.69    6.60
  -4   2  -1  123.99    6.50
  -4  -2   1  118.39    6.50
  -4  -2   1  126.19    5.80
  -4   2  -1  121.29    6.00
   4   2   1  127.79    6.60
  -5   2   1 3417.06  123.69
  -5  -2  -1 3466.35  123.79
   5  -2   1 3321.27  123.79
  -5   2   1 3495.45  122.59
   5   2  -1 3546.25  123.89
  -5  -2  -1 3443.06  122.99
   5   2   1 3483.65  123.79
  -5   2  -1 3309.07  122.79
  -5  -2   1 3326.27  122.59
  -5   2  -1 3324.87  123.69
  -5  -2   1 3448.46  123.69
   5  -2  -1 3298.87  123.69
   6   2  -1  174.78    9.10
  -6  -2  -1  163.58    9.00
  -6   2   1  180.38    8.10
   6  -2   1  163.18    9.00
  -6  -2  -1  162.48    8.20
  -6   2   1  171.48    9.00
  -6  -2   1  180.58    8.10
  -6   2  -1  176.78    9.10
  -6   2  -1  173.68    8.30
  -6  -2   1  164.78    8.90
   6   2   1  160.78    9.00
   6  -2  -1  179.78    9.20
  -7  -2  -1 1161.78   46.70
   7   2  -1 1200.28   46.70
  -7  -2  -1 1190.88   45.70
  -7  -2  -1 1231.48   51.79
  -7   2   1 1214.48   46.80
   7  -2   1 1257.67   47.10
  -7   2   1 1229.68   45.40
  -7   2  -1 1207.78   45.60
   7   2   1 1231.28   47.00
   7  -2  -1 1235.58   46.90
  -7   2  -1 1179.08   46.70
  -7  -2   1 1197.98   46.80
  -7  -2   1 1206.98   45.40
  -8  -2  -1    1.60    2.20
  -8   2   1    4.00    1.60
  -8  -2  -1    0.40    1.40
   8   2  -1    1.30    2.10
   8  -2   1    2.20    1.90
   8   2  -1    2.40    1.80
  -8  -2  -1    4.00    1.90
  -8   2   1    1.20    1.60
  -8   2  -1    2.50    1.60
  -8   2  -1    1.70    1.70
   8   2   1    2.80    2.10
   8  -2  -1    3.60    2.20
  -8  -2   1    1.30    1.40
  -8  -2   1    0.40    1.60
  -9   2   1   47.50    5.10
   9   2  -1   55.89    6.20
  -9  -2  -1   53.29    5.30
   9  -2   1   50.89    5.30
   9  -2   1   58.09    7.70
   9   2  -1   52.89    5.20
  -9  -2  -1   48.00    4.30
  -9   2   1   52.09    4.20
  -9  -2  -1   54.99    7.80
  -9  -2   1   48.70    5.10
   9   2   1   58.99    6.30
  -9  -2   1   71.49    6.20
   9  -2  -1   47.30    6.40
   9  -2  -1   52.59    5.30
  -9   2  -1   49.90    4.30
   9   2   1   51.89    5.20
  -9   2  -1   56.79    5.40
  -9  -2   1   44.90    4.10
 -10  -2  -1  154.08   11.50
 -10  -2  -1  124.49    8.10
 -10   2   1  135.99    8.00
  10   2  -1  153.08    9.80
  10  -2   1  146.79   10.20
 -10  -2  -1  156.08    9.80
 -10   2   1  149.39    9.60
  10   2   1  139.89    9.20
 -10   2  -1  146.09    9.70
 -10  -2   1  153.68    8.40
 -10  -2   1  150.28   10.30
 -10  -2   1  139.99    9.50
  10  -2  -1  143.89   10.20
 -10   2  -1  147.19    8.40
 -11   2   1    1.40    1.70
 -11  -2  -1    4.90    2.90
 -11  -2  -1    0.50    1.60
  11   2  -1   -1.80    2.30
 -11   2   1   -0.60    1.70
  11  -2   1   -1.50    2.10
 -11  -2  -1    3.30    2.40
 -11  -2   1    0.60    1.90
 -11   2  -1    3.30    2.40
 -11   2  -1    3.00    2.10
  11   2   1   -0.50    2.20
  11  -2  -1   -4.90    1.80
 -11  -2   1    0.10    1.70
  11  -2  -1    1.50    2.50
 -11  -2   1   10.30    3.10
 -12  -2  -1   -2.80    1.90
 -12   2   1   -3.30    1.50
  12  -2   1    0.50    2.90
 -12  -2  -1    3.10    2.10
 -12  -2  -1   -0.40    1.90
  12   2  -1   -0.70    2.30
 -12   2   1   -1.30    1.50
  12  -2  -1    2.80    2.90
  12   2   1   -0.50    2.30
  12  -2  -1   -3.00    2.50
 -12  -2   1   -1.70    1.70
 -12  -2   1   -3.00    2.10
 -12  -2   1   -0.80    1.40
 -12   2  -1    1.50    2.70
 -13   2   1   67.09    5.70
  13   2  -1   59.49    7.90
 -13   2   1   75.59    7.60
  13  -2   1   66.09    7.70
 -13  -2  -1   62.49    6.70
 -13  -2  -1   56.29    8.90
 -13  -2  -1   64.99    8.20
  13  -2   1   55.59    8.20
 -13   2  -1   50.99    7.10
  13  -2  -1   57.69    7.60
 -13  -2   1   66.09    5.80
  13   2   1   50.29    7.10
 -13   2  -1   57.39    6.20
 -13  -2   1   68.79    7.20
  13  -2  -1   56.69    8.30
 -13  -2   1   66.59    8.20
  14  -2   1   17.60    4.50
 -14  -2  -1   18.30    4.00
 -14  -2  -1    4.70    4.10
 -14   2   1   18.00    3.80
  14  -2   1   18.70    5.70
 -14   2   1   15.50    4.60
  14   2  -1   14.40    4.90
 -14  -2  -1   21.90    5.00
 -14  -2   1   16.80    3.80
 -14  -2   1   21.50    5.20
  14   2   1   16.30    4.80
 -14  -2   1   21.10    5.00
 -14   2  -1   16.20    4.50
  14  -2  -1   10.00    4.50
 -14   2  -1   11.50    3.30
  14  -2  -1   23.00    5.20
 -15  -2  -1  176.78   12.90
 -15  -2  -1  158.28   13.60
 -15   2   1  172.08   10.50
  15  -2   1  169.48   12.40
 -15   2   1  180.28   13.10
 -15  -2  -1  177.68   11.20
  15   2  -1  173.58   12.60
  15  -2   1  172.88   13.40
 -15  -2   1  181.68   13.20
 -15   2  -1  195.08   13.50
 -15  -2   1  193.98   13.30
  15   2   1  172.08   12.50
 -15  -2   1  177.58   10.90
  15  -2  -1  170.18   13.90
  15  -2  -1  173.28   12.50
 -15   2  -1  172.28   10.80
 -16  -2  -1   -1.20    2.30
  16  -2   1    0.60    3.20
 -16   2   1    0.60    2.40
  16  -2   1    0.50    3.30
 -16  -2  -1   -3.20    2.00
  16   2  -1    4.30    4.00
 -16  -2  -1    6.40    3.90
 -16   2   1    1.20    3.20
  16   2  -1   -6.50    3.30
  16  -2  -1    2.40    3.70
 -16  -2   1   -0.20    2.30
 -16   2  -1   -0.80    2.50
 -16   2  -1   -0.60    3.10
  16  -2  -1   -3.70    3.30
 -16  -2   1   -4.80    2.40
  16   2   1   -1.80    3.20
  17  -2   1   65.99    9.30
 -17   2   1   77.09   10.50
  17   2  -1   64.99   11.10
 -17  -2  -1   79.89    9.80
 -17  -2  -1   64.39    9.40
  17  -2   1   69.29   10.50
 -17  -2  -1   75.79    8.40
 -17   2   1   59.19    7.20
  17   2  -1   76.39   10.10
 -17   2  -1   70.09    9.90
 -17   2  -1   71.09    8.00
  17  -2  -1   78.29   10.30
 -17  -2   1   83.89    8.60
 -17  -2   1   63.99    9.70
  17   2   1   65.89    9.60
  17  -2  -1   68.79   10.80
  18  -2   1   98.09   11.70
 -18  -2  -1  132.69   10.00
 -18  -2  -1  126.69   11.70
  18  -2   1  114.99   14.40
 -18   2   1  119.59    9.50
  18   2  -1  117.19   12.90
 -18   2   1  113.99   11.50
  18   2  -1  123.59   14.80
  18   2   1  130.09   11.50
 -18   2  -1  137.49   12.10
 -18  -2   1  120.39    9.40
 -18  -2   1  103.79   11.00
  18  -2  -1  105.99   12.50
 -18   2  -1  122.99    9.80
  18  -2  -1  124.89   15.10
  18   2   1   98.99   13.20
 -19   2   1   12.10    4.20
  19  -2   1    9.90    5.20
 -19  -2  -1   18.00    4.90
 -19   2   1   12.40    5.40
  19  -2   1   11.20    5.70
 -19  -2  -1   15.00    5.70
  19   2  -1   13.80    6.10
  19   2  -1   15.80    6.00
  19  -2  -1   23.90    7.60
 -19  -2   1   22.50    6.50
  19  -2  -1   12.30    5.90
  19   2   1   24.10    7.40
 -19   2  -1   19.90    6.20
 -19   2  -1   23.20    5.50
 -19  -2   1   20.00    5.00
  19   2   1   13.20    5.40
  20  -2   1   15.50    6.20
 -20   2   1   19.90    4.90
 -20  -2  -1   15.10    6.10
  20   2  -1   15.50    6.80
  20   2  -1   17.20    6.20
 -20   2   1   19.20    6.20
 -20  -2  -1   22.80    5.50
  20  -2   1   24.00    7.90
 -20  -2   1   15.40    4.90
  20   2   1   23.50    7.90
  20  -2  -1   28.70    7.40
 -20   2  -1   12.70    5.50
 -20  -2   1   15.20    5.90
  20  -2  -1   11.60    6.50
 -20   2  -1   28.90    5.70
  20   2   1   15.60    6.50
  21  -2   1   14.90    6.90
  21  -2   1   25.10    7.10
  21   2  -1    4.70    5.50
 -21   2   1    1.70    3.50
  21   2  -1    2.60    5.50
 -21  -2  -1    7.80    5.40
 -21  -2  -1    5.80    3.80
 -21   2   1    2.40    4.70
 -21  -2   1    1.00    5.10
 -21  -2   1   10.80    4.20
  21  -2  -1    1.00    4.60
  21  -2  -1    4.80    5.50
 -21   2  -1    6.60    3.80
  21   2   1   10.40    5.90
  21   2   1    3.50    5.90
 -21   2  -1    9.40    5.20
 -22   2   1   13.30    6.60
 -22  -2  -1   22.40    7.90
 -22   2   1   26.10    5.90
  22   2  -1   12.90    8.00
  22   2  -1   34.90    8.30
 -22  -2  -1   16.30    5.60
  22  -2   1   10.90    6.50
  22  -2   1   20.00    6.90
  22  -2  -1   24.40    7.70
 -22  -2   1   22.20    5.90
 -22   2  -1   18.50    6.90
 -22  -2   1   24.30    7.30
  22   2   1   26.00    8.70
  22   2   1   37.70    9.20
  22  -2  -1   22.80    8.50
 -22   2  -1   24.30    6.30
  23   2  -1   18.00    8.50
 -23  -2  -1   36.70    8.80
 -23  -2  -1   19.60    5.90
 -23   2   1   33.10    6.90
  23  -2   1   16.40    7.10
  23   2  -1   27.00    7.90
 -23   2   1   29.60    8.50
  23  -2   1   15.90    7.70
  23   2   1   14.30    6.30
 -23   2  -1   20.80    6.20
  23  -2  -1   31.10    9.30
  23  -2  -1   27.70    7.90
  23   2   1   22.00    9.10
 -23  -2   1   34.50    9.10
 -23   2  -1   38.60    8.90
 -23  -2   1   19.60    5.80
  24  -2   1    0.60    5.60
  24   2  -1    8.80    7.30
 -24  -2  -1   15.30    5.10
  24  -2   1    5.80    6.40
 -24  -2  -1    7.00    6.10
 -24   2   1    2.20    4.10
  24   2  -1    5.40    5.90
 -24   2   1   14.00    6.50
 -24   2  -1    5.40    4.20
  24   2   1    2.80    6.50
 -24  -2   1    7.80    5.50
  24  -2  -1    6.70    5.60
  24   2   1    5.00    6.40
 -24  -2   1   11.10    5.00
  24  -2  -1   -1.70    5.10
 -24   2  -1    8.60    6.70
 -25  -2  -1    1.00    5.20
  25   2  -1   -7.10    5.40
 -25   2   1   -5.50    3.50
 -25   2   1   -2.30    5.20
  25  -2   1   11.70    8.10
  25   2  -1    3.20    5.80
  25  -2   1   -7.80    4.90
 -25  -2  -1    6.80    4.80
  25  -2  -1    6.50    7.40
 -25  -2   1   -1.30    3.90
 -25   2  -1    1.90    5.10
 -25  -2   1   -0.10    5.40
 -25   2  -1   -3.20    3.40
 -25   2  -1   -3.60    6.90
  25   2   1    6.20    6.20
  25  -2  -1    5.70    5.80
  25   2   1  -11.20    5.50
 -26  -2  -1    1.20    5.80
  26   2  -1   26.20    9.80
 -26   2   1    6.60    4.80
 -26   2   1    7.90    6.70
 -26  -2  -1   26.40    6.80
  26  -2   1   -5.60    6.50
  26   2  -1    1.50    5.90
  26  -2   1    1.40    6.10
 -26   2  -1   26.70    7.20
  26   2   1   14.10    8.90
 -26   2  -1    9.10    9.30
  26   2   1   14.60    7.70
 -26  -2   1    7.70    5.20
 -26   2  -1    6.30    6.10
  26  -2  -1    4.60    5.80
 -26  -2   1   14.20    7.30
  26  -2  -1    9.70    7.00
   0   3  -1    0.20    0.60
   0   3   1   -0.10    0.50
   0  -3  -1   -0.70    0.50
   0  -3   1    0.00    0.60
   0   3   1    0.20    0.60
  -1  -3  -1   79.49    3.90
  -1   3   1   86.29    4.10
   1   3  -1   80.59    4.10
  -1  -3  -1   79.29    4.10
   1  -3   1   79.19    4.00
  -1  -3   1   72.59    3.60
   1   3   1   82.49    4.20
   1   3   1   77.39    3.90
  -1  -3   1   85.29    4.20
  -1   3  -1   84.19    4.10
  -2  -3  -1   11.10    1.60
  -2  -3  -1   15.90    2.00
   2   3  -1   14.60    1.90
  -2  -3   1   12.30    1.40
   2   3   1   14.00    1.90
   2   3   1   14.00    1.60
  -2  -3   1   13.70    1.90
   3   3  -1   11.10    1.80
   3   3  -1   11.90    1.80
  -3  -3  -1   11.90    2.00
  -3   3  -1   12.20    1.80
   3   3   1   11.10    1.90
  -3  -3   1    8.50    1.80
   4   3  -1  326.37   13.90
  -4   3   1  311.47   13.30
   4   3  -1  345.97   14.20
  -4  -3  -1  311.67   14.10
  -4   3  -1  332.07   14.20
  -4  -3   1  338.07   14.10
  -4   3  -1  332.57   13.60
   4   3   1  329.87   14.20
  -5  -3  -1  487.75   20.60
   5   3  -1  495.75   20.60
   5  -3   1  520.35   20.90
  -5   3   1  533.65   19.80
  -5   3   1  493.35   20.70
   5   3  -1  492.05   20.40
  -5  -3  -1  504.55   19.90
  -5  -3   1  521.05   20.80
   5   3   1  492.95   20.70
  -5   3  -1  472.05   19.80
  -5   3  -1  525.75   21.80
  -5   3  -1  471.85   20.60
  -6   3   1  217.48   10.00
   6   3  -1  236.18   11.20
  -6   3   1  235.58   11.30
  -6  -3  -1  218.28   11.10
   6  -3   1  217.58   11.20
  -6  -3  -1  212.48   10.20
  -6   3  -1  222.98   10.30
   6   3   1  226.98   11.20
  -6   3  -1  225.28   11.20
  -6  -3   1  232.18   11.30
  -6  -3   1  232.38   10.10
  -7  -3  -1 1006.40   40.30
   7  -3   1  959.40   37.90
  -7   3   1  930.61   37.60
  -7   3   1  969.00   36.30
   7   3  -1  973.40   37.80
  -7  -3  -1  926.31   36.50
  -7  -3  -1  880.81   37.50
  -7   3  -1  935.11   36.50
  -7   3  -1  937.11   37.70
   7  -3  -1 1011.90   38.00
   7   3   1  977.20   37.80
  -7  -3   1  976.90   37.80
  -7  -3   1  886.61   36.00
  -8   3   1  248.18   11.60
  -8   3   1  241.68   12.90
   8   3  -1  252.57   13.00
  -8  -3  -1  233.58   11.80
  -8  -3  -1  272.67   13.50
   8  -3   1  272.37   13.40
  -8  -3  -1  254.77   15.00
   8   3  -1  266.17   13.20
   8  -3  -1  267.67   13.30
  -8  -3   1  252.57   13.00
  -8   3  -1  242.48   11.90
   8   3   1  260.97   13.30
  -8   3  -1  242.88   12.90
  -8  -3   1  264.17   11.80
  -9  -3  -1  362.46   17.10
  -9  -3  -1  370.26   19.60
   9   3  -1  330.27   16.60
  -9   3   1  333.17   16.70
  -9  -3  -1  341.17   15.60
  -9   3   1  340.27   15.20
   9  -3   1  367.26   18.90
   9   3  -1  342.87   16.80
   9  -3   1  334.27   18.90
   9   3   1  356.86   16.60
  -9   3  -1  342.97   16.80
   9  -3  -1  354.36   17.10
  -9  -3   1  335.27   16.70
  -9  -3   1  327.67   17.80
  -9   3  -1  329.57   15.30
   9   3   1  386.76   19.20
  -9  -3   1  325.47   15.20
   9  -3  -1  359.46   17.70
 -10   3   1  130.69    7.60
 -10  -3  -1  120.19    8.90
 -10   3   1  128.59    9.10
 -10  -3  -1  126.19    7.90
  10  -3   1  137.59    9.70
  10   3  -1  135.89    9.10
 -10  -3  -1  121.59   10.60
 -10  -3   1  135.49    7.80
 -10  -3   1  131.59    9.10
 -10   3  -1  138.59    9.30
 -10  -3   1  136.89   10.00
 -10   3  -1  131.39    7.80
  10  -3  -1  136.79    9.80
  10   3   1  135.99    8.80
  11  -3   1   -0.30    2.60
 -11  -3  -1    9.00    3.20
 -11   3   1    5.20    2.00
 -11   3   1    5.30    2.60
 -11  -3  -1   -0.50    2.40
 -11  -3  -1    3.20    2.20
  11   3  -1    1.30    2.70
 -11   3  -1    3.90    2.20
 -11   3  -1   -2.10    1.60
 -11  -3   1    3.40    2.60
  11   3   1    6.20    3.20
  11  -3  -1    4.70    3.20
 -11  -3   1    1.60    2.00
 -12  -3  -1   25.40    4.30
 -12   3   1   21.30    3.60
 -12  -3  -1   32.30    6.60
  12   3  -1   21.40    4.80
  12  -3   1   30.50    5.80
 -12   3   1   16.00    4.40
 -12  -3  -1   21.90    4.70
  12   3   1   23.50    4.80
  12  -3  -1   17.90    5.20
 -12  -3   1   25.50    5.60
 -12   3  -1   22.60    4.70
 -12  -3   1   19.70    4.60
 -12  -3   1   23.80    4.00
 -12   3  -1   25.60    4.00
  13  -3   1   43.20    7.10
 -13   3   1   37.40    4.80
 -13  -3  -1   31.80    4.80
 -13  -3  -1   38.40    6.20
 -13  -3  -1   43.00    7.80
  13   3  -1   30.30    6.10
 -13   3   1   37.10    6.00
  13   3   1   35.70    5.90
  13  -3  -1   32.60    6.70
 -13  -3   1   39.40    7.00
 -13   3  -1   36.10    6.10
 -13  -3   1   41.60    5.30
  13  -3  -1   24.10    5.10
 -13   3  -1   39.00    5.10
 -13  -3   1   31.90    5.70
 -14  -3  -1   54.79    6.50
  14   3  -1   61.89    8.40
 -14  -3  -1   56.69    9.30
 -14   3   1   53.79    7.70
  14  -3   1   51.19    7.90
 -14  -3  -1   55.59    7.90
 -14   3   1   56.69    6.30
  14   3   1   49.20    7.40
  14  -3  -1   45.20    7.80
 -14   3  -1   51.89    6.20
 -14  -3   1   86.39    8.10
 -14  -3   1   61.69    8.40
  14  -3  -1   55.99    7.60
 -14   3  -1   48.40    7.50
 -14  -3   1   48.50    6.10
 -15  -3  -1   75.69    9.30
 -15   3   1   71.49    7.50
  15  -3   1   73.39    8.80
 -15  -3  -1   83.19    8.60
 -15  -3  -1   69.79    7.60
  15   3  -1   79.59    9.60
 -15   3   1   84.29    8.60
  15  -3   1   88.39   11.00
  15  -3  -1   88.49   11.00
 -15   3  -1   63.79    7.20
 -15  -3   1   87.69    7.20
 -15  -3   1   64.49    8.30
  15   3   1   78.39    9.40
 -15  -3   1   70.09    9.30
  15  -3  -1   69.29    9.10
 -15   3  -1   88.09    8.80
 -16  -3  -1    6.10    3.40
 -16   3   1    8.60    4.20
 -16   3   1    3.90    2.80
 -16  -3  -1   14.30    4.90
 -16  -3  -1    0.20    3.00
  16   3  -1    6.70    4.10
  16  -3   1    7.90    4.20
  16  -3   1    2.00    4.10
  16  -3  -1    4.30    4.30
 -16   3  -1   -1.10    2.60
 -16   3  -1    3.50    3.30
 -16  -3   1    9.70    4.00
 -16  -3   1    2.00    2.40
  16  -3  -1    2.70    3.50
  16   3   1    0.50    3.80
 -16  -3   1   -0.20    3.10
 -17   3   1   20.60    4.40
  17   3  -1   28.70    6.90
  17  -3   1   20.40    5.80
 -17   3   1   24.80    6.50
  17  -3   1   17.00    6.40
 -17  -3  -1   15.10    5.40
 -17  -3  -1   26.30    6.80
 -17  -3  -1   26.50    5.20
 -17  -3   1   21.70    6.10
  17  -3  -1   20.00    6.70
 -17  -3   1   11.80    5.10
 -17   3  -1   17.60    4.80
  17   3   1   16.60    6.00
  17  -3  -1   25.20    6.20
 -17   3  -1   20.30    5.90
 -17  -3   1   17.30    4.30
 -18  -3  -1   56.09    9.60
  18   3  -1   58.09   10.40
  18   3  -1   46.30    8.50
 -18   3   1   57.39    9.30
  18  -3   1   65.99   10.60
  18  -3   1   39.20    8.00
 -18   3   1   40.40    6.50
 -18  -3  -1   56.59    9.10
 -18  -3  -1   52.99    7.50
  18  -3  -1   48.90    9.90
 -18   3  -1   34.90    6.10
 -18  -3   1   47.60    8.60
 -18   3  -1   55.29    9.40
  18  -3  -1   51.59    8.60
 -18  -3   1   50.69    7.00
  18   3   1   46.30    8.50
  19  -3   1    9.20    5.00
  19   3  -1    1.30    5.10
 -19   3   1   18.40    4.80
 -19   3   1    8.00    5.70
  19   3  -1   14.60    5.40
 -19  -3  -1   11.90    4.50
  19  -3   1   19.80    7.00
 -19   3  -1   12.00    5.80
 -19  -3   1   16.60    4.40
  19   3   1   13.70    5.80
  19  -3  -1    7.20    5.00
 -19  -3   1   14.80    5.70
  19   3   1    5.30    5.20
 -19   3  -1   10.20    4.30
  19  -3  -1   13.70    6.40
 -20   3   1   70.69    8.60
  20   3  -1   69.09   11.70
 -20   3   1   90.69   12.20
 -20  -3  -1   73.99    8.90
  20  -3   1   59.59   10.80
 -20  -3  -1   53.79   10.00
  20   3  -1   61.19   10.20
  20  -3   1   54.49    9.70
 -20   3  -1   84.29    9.50
 -20   3  -1   87.29   11.90
 -20  -3   1   65.99    8.20
 -20  -3   1   84.89   11.70
  20  -3  -1   72.59   12.40
  20   3   1   64.49   10.50
  20   3   1   66.89   12.00
  20  -3  -1   67.39   10.80
 -21   3   1   20.50    5.10
 -21  -3  -1    9.20    4.40
 -21  -3  -1   14.00    6.10
  21   3  -1   25.00    8.00
 -21   3   1   14.00    6.50
  21   3  -1   14.00    6.10
  21  -3   1    4.80    5.10
  21  -3   1   11.10    5.60
  21  -3  -1    1.70    4.80
  21  -3  -1    7.60    6.50
  21   3   1    9.10    5.90
 -21  -3   1   17.70    5.10
 -21   3  -1   15.20    5.90
  21   3   1    3.60    6.10
 -21   3  -1   15.30    4.90
 -21  -3   1   12.60    5.80
  22   3  -1   44.00   10.30
 -22   3   1   43.10    7.40
  22  -3   1   45.70   10.50
 -22  -3  -1   39.00    9.40
 -22  -3  -1   45.60    7.90
  22   3  -1   34.80    8.90
  22  -3   1   34.90    8.60
 -22   3   1   28.00    8.20
 -22   3  -1   34.70    7.10
 -22   3  -1   59.09   10.90
  22   3   1   33.90    8.20
  22  -3  -1   49.00   10.80
 -22  -3   1   65.59    8.80
  22   3   1   17.60    7.70
 -22  -3   1   34.10    9.20
  22  -3  -1   29.30    8.10
 -23  -3  -1    6.40    5.50
 -23   3   1    8.30    4.50
  23  -3   1   19.60    7.80
 -23   3   1   -6.70    3.70
  23  -3   1   16.70    6.80
  23   3  -1    5.20    6.70
 -23  -3  -1    8.30    4.30
  23   3  -1    9.90    6.00
 -23   3  -1    4.90    4.30
 -23  -3   1    5.20    3.90
  23  -3  -1    2.00    5.60
 -23   3  -1    9.20    8.40
  23   3   1    0.30    4.60
  23   3   1   14.80    7.00
 -23  -3   1    2.00    5.10
 -23   3  -1    9.30    4.70
  23  -3  -1   20.90    7.30
  24   3  -1    3.10    5.40
 -24   3   1   16.40    5.60
  24  -3   1   20.00    7.90
  24   3  -1    9.90    7.60
 -24  -3  -1   28.80    8.50
 -24  -3  -1   12.60    5.20
 -24   3   1   24.90    8.30
  24  -3   1    9.70    6.50
 -24  -3   1   11.50    5.30
 -24   3  -1   18.30    6.90
  24   3   1   23.90    7.80
  24  -3  -1   34.50    9.40
  24  -3  -1   18.50    7.60
  24   3   1   19.60    8.60
 -24   3  -1   22.70    6.20
 -24   3  -1   -7.60    5.80
 -24  -3   1   24.30    8.10
 -25  -3  -1    1.00    3.90
 -25   3   1    4.00    5.60
  25  -3   1   -5.10    5.30
  25  -3   1    7.30    5.80
 -25  -3  -1    9.50    5.70
  25   3  -1   -4.10    6.90
  25   3  -1    4.40    6.40
 -25   3   1    5.80    4.30
 -25   3   1    7.10    8.70
 -25   3  -1    4.60    4.90
 -25  -3   1    6.90    4.40
  25  -3  -1    0.40    5.20
 -25  -3   1   -6.20    4.60
  25  -3  -1    4.80    6.90
  25   3   1    0.00    5.80
 -25   3  -1   -2.10    4.00
  25   3   1    2.80    6.50
 -25   3  -1    3.00    8.10
 -26   3   1   -2.40    3.70
 -26  -3  -1    9.80    5.70
  26  -3   1    9.20    7.00
  26   3  -1   -8.70    5.90
  26   3  -1   10.80    6.60
 -26   3   1   -8.90    3.50
 -26  -3  -1   11.30    6.20
 -26   3   1    1.60    7.90
  26  -3   1    3.40    6.40
  26   3   1    0.20    5.70
 -26   3  -1    3.20    3.90
 -26  -3   1   -5.70    4.20
 -26   3  -1    1.50    7.20
  26  -3  -1   -0.60    4.70
 -26   3  -1    5.60    5.50
  26   3   1    1.10    6.40
   0   4  -1  953.10   33.60
   0  -4  -1  837.52   33.40
   0  -4   1  894.81   33.60
   0   4  -1  932.11   33.40
   0   4   1  904.41   33.30
   0   4   1  867.61   33.50
   1   4  -1  378.46   14.50
  -1   4   1  361.66   14.30
   1  -4   1  355.36   14.30
   1   4  -1  349.77   13.70
  -1  -4  -1  358.46   14.40
  -1  -4  -1  338.47   14.00
  -1   4  -1  347.97   14.30
  -1  -4   1  364.16   14.40
  -1  -4   1  357.36   13.80
   1   4   1  371.76   14.10
   1   4   1  340.37   14.40
   1  -4  -1  361.66   14.30
  -2  -4  -1  240.58   10.60
  -2  -4  -1  240.48   10.10
   2   4  -1  235.28    9.80
   2   4  -1  240.58   10.60
   2   4  -1  248.98   10.70
  -2  -4   1  241.28   10.60
  -2   4  -1  243.28   10.40
   2   4   1  238.68   10.20
  -2  -4   1  245.28    9.90
   2   4   1  250.47   10.70
  -3  -4  -1    4.40    1.40
  -3  -4  -1    5.10    1.80
   3   4  -1    4.30    1.50
   3   4  -1    3.80    1.40
  -3  -4   1    5.40    1.40
  -3  -4   1    4.90    1.60
   3   4   1    4.70    1.60
   4   4  -1  366.86   15.30
  -4  -4  -1  371.36   15.80
   4   4  -1  360.26   15.60
  -4   4  -1  385.16   15.30
  -4  -4   1  340.37   15.60
   4   4   1  379.46   15.90
   5   4  -1  657.23   27.00
   5   4  -1  707.43   27.50
  -5   4   1  687.13   27.60
  -5   4   1  655.13   26.50
  -5  -4  -1  701.03   27.60
   5   4   1  704.73   27.60
  -5  -4   1  672.23   27.40
  -5   4  -1  682.13   27.60
  -5   4  -1  691.53   26.70
  -6  -4  -1    1.30    2.60
  -6   4   1    2.30    1.30
   6   4  -1    0.30    1.40
  -6   4   1    2.40    1.90
  -6  -4  -1    0.60    1.50
   6   4  -1    1.90    1.60
  -6   4  -1    0.90    1.30
  -6   4  -1    1.00    1.80
  -6  -4   1    3.00    1.80
  -6   4  -1    0.80    1.90
   6   4   1    0.20    1.50
  -7   4   1  317.77   13.70
  -7  -4  -1  305.77   14.90
  -7  -4  -1  308.07   13.90
  -7   4   1  284.77   14.80
  -7  -4  -1  306.57   16.80
   7   4  -1  342.57   15.10
  -7   4  -1  363.76   16.70
   7   4   1  298.37   14.80
  -7  -4   1  296.07   14.70
  -7   4  -1  312.67   13.90
  -7   4  -1  323.17   15.10
   8   4  -1   73.79    6.00
  -8  -4  -1   74.89    5.20
   8   4  -1   77.39    6.10
  -8   4   1   72.79    5.10
  -8  -4  -1   76.29    7.60
   8  -4   1   75.99    6.30
  -8  -4  -1   87.59    6.40
  -8   4   1   69.39    5.90
  -8  -4   1   71.89    5.10
  -8   4  -1   75.79    5.20
  -8   4  -1   78.89    7.20
  -8  -4   1   65.09    6.00
   8   4   1   75.59    6.10
  -8   4  -1   71.99    6.10
  -9  -4  -1  104.19    6.80
   9  -4   1  119.19    9.80
  -9  -4  -1  107.39    9.60
  -9   4   1  113.29    8.00
   9   4  -1  124.29    8.30
   9   4  -1  114.19    8.10
  -9   4   1  118.49    7.00
  -9  -4  -1  114.99    8.20
   9   4   1  111.69    7.70
  -9  -4   1  112.89    6.80
  -9  -4   1  111.59    8.80
   9  -4  -1  122.89    8.90
  -9   4  -1  118.79    9.50
  -9  -4   1  104.19    8.00
  -9   4  -1  118.09    7.10
  -9   4  -1  108.99    8.00
  10   4  -1  547.05   24.60
 -10  -4  -1  548.45   27.60
 -10   4   1  534.95   24.70
 -10   4   1  557.14   23.00
  10  -4   1  555.04   25.30
 -10  -4  -1  548.45   23.20
 -10  -4  -1  545.05   24.90
  10   4   1  582.24   24.50
 -10  -4   1  514.45   24.70
 -10   4  -1  531.65   24.70
 -10  -4   1  552.74   26.40
 -10  -4   1  574.94   23.10
 -10   4  -1  525.55   23.10
  10  -4  -1  555.34   25.60
 -11  -4  -1  175.68   10.40
 -11  -4  -1  196.18   14.20
 -11   4   1  187.38   12.00
  11  -4   1  213.28   13.00
 -11   4   1  195.38   10.40
  11   4  -1  211.28   12.30
 -11  -4  -1  194.28   12.20
  11  -4  -1  193.48   12.70
 -11  -4   1  187.88   10.30
 -11   4  -1  199.68   12.20
 -11  -4   1  207.28   12.60
 -11   4  -1  197.98   10.60
  11   4   1  214.08   12.00
 -11  -4   1  190.38   13.00
  12  -4   1  103.59    8.80
 -12  -4  -1   86.39    8.00
 -12  -4  -1   91.19    6.90
 -12   4   1   84.19    6.50
 -12   4   1   92.19    8.10
 -12  -4  -1   97.49    9.80
  12   4  -1   94.79    8.10
 -12   4  -1   95.79    8.20
 -12   4  -1   87.59    6.70
  12   4   1  100.19    8.20
  12  -4  -1  102.79    9.00
 -12  -4   1   97.19    6.90
 -12  -4   1   94.79    9.00
 -12  -4   1   87.29    8.10
 -13   4   1   -0.30    2.60
 -13  -4  -1    4.60    3.00
 -13  -4  -1    8.20    2.90
  13   4  -1   11.40    4.40
 -13   4   1    5.90    2.50
 -13  -4  -1    8.70    4.20
  13  -4   1   10.60    4.40
 -13   4  -1   14.40    3.40
  13  -4  -1    8.00    3.90
 -13  -4   1    7.80    3.80
  13   4   1   10.90    3.80
 -13  -4   1    9.60    2.80
 -13   4  -1    7.60    3.30
 -13  -4   1   24.00    5.10
 -14   4   1    7.70    3.80
 -14  -4  -1   11.30    4.20
  14   4  -1    5.30    3.50
  14  -4   1   11.90    4.30
 -14  -4  -1    4.00    2.50
 -14  -4  -1   17.70    5.20
 -14   4   1    7.40    3.00
 -14   4  -1    7.70    3.10
 -14   4  -1    5.20    3.40
 -14  -4   1    7.10    3.80
 -14  -4   1    5.80    2.50
  14  -4  -1    9.60    4.30
  14   4   1    1.60    3.20
 -15  -4  -1   17.10    4.90
  15   4  -1    7.50    4.40
 -15   4   1   17.40    3.80
 -15  -4  -1   13.70    3.80
  15  -4   1   19.10    5.70
 -15   4   1   15.30    5.00
 -15  -4   1   -2.10    3.90
 -15  -4   1   10.40    4.70
 -15   4  -1    9.70    3.30
 -15   4  -1   13.90    5.10
 -15  -4   1   11.80    3.40
  15  -4  -1   24.80    6.10
  15   4   1    8.30    4.40
  15  -4  -1   15.00    5.00
 -16  -4  -1   20.20    5.70
 -16   4   1   31.90    6.70
 -16   4   1   30.10    5.00
  16   4  -1   23.50    5.90
 -16  -4  -1   30.30    8.10
  16  -4   1   25.00    6.50
 -16  -4  -1   24.20    4.80
  16  -4   1   22.70    5.50
 -16   4  -1   23.00    4.80
  16   4   1   34.70    6.60
 -16   4  -1   26.40    6.00
 -16  -4   1   21.70    6.10
 -16  -4   1   36.60    7.00
  16  -4  -1   18.00    5.30
  16  -4  -1   31.80    7.60
 -16  -4   1   28.20    5.10
 -17   4   1    3.90    3.20
  17  -4   1   14.30    5.60
  17   4  -1   11.70    5.30
 -17  -4  -1    9.20    4.00
  17  -4   1   12.20    4.80
 -17  -4  -1   27.90    6.40
 -17  -4  -1   15.90    5.40
 -17   4   1    7.00    4.30
  17  -4  -1    8.00    4.80
 -17   4  -1    4.40    3.10
 -17   4  -1   12.90    5.10
  17   4   1    3.70    4.50
 -17  -4   1   26.60    5.00
  17  -4  -1   21.50    6.50
 -17  -4   1    8.90    3.50
 -17  -4   1    6.10    4.80
 -18   4   1   26.80    5.20
  18   4  -1   35.00    7.40
 -18  -4  -1   35.10    8.50
 -18  -4  -1   31.00    7.10
 -18   4   1   40.10    7.90
 -18  -4  -1   31.40    5.90
  18  -4   1   24.30    7.10
  18  -4   1   28.50    6.70
  18  -4  -1   26.20    7.50
  18  -4  -1   21.60    6.70
 -18  -4   1   28.70    5.70
  18   4   1   44.80    8.30
 -18   4  -1   35.40    6.10
 -18  -4   1   38.30    7.30
 -18  -4   1   24.50    6.60
 -18   4  -1   30.60    7.20
 -19  -4  -1    1.90    4.30
 -19   4   1   -1.80    2.40
  19  -4   1    8.20    4.80
  19   4  -1    2.20    4.80
 -19   4   1    2.50    3.90
  19   4  -1    3.40    4.90
 -19  -4  -1    7.30    3.50
 -19  -4  -1    9.50    4.00
  19  -4   1    4.80    5.00
 -19  -4   1   -3.90    3.00
 -19   4  -1   -1.60    2.90
  19   4   1    1.70    3.80
 -19   4  -1   -6.00    3.00
  19  -4  -1    0.30    4.70
  19  -4  -1    0.30    4.10
 -19  -4   1    1.80    3.30
  20   4  -1   -0.40    5.20
  20  -4   1    6.40    5.30
  20   4  -1    3.50    4.80
  20  -4   1    4.70    5.60
 -20   4   1   -3.90    3.40
 -20  -4  -1   -0.10    3.00
 -20  -4  -1   -6.10    3.70
 -20  -4  -1    0.20    4.40
 -20   4   1    0.20    3.20
 -20  -4   1    1.80    4.10
  20  -4  -1   -9.30    3.20
  20   4   1    6.10    4.60
 -20   4  -1   11.90    5.70
 -20   4  -1    0.20    3.20
  20  -4  -1    2.00    4.50
 -20   4  -1   -0.20    6.20
 -20  -4   1    6.90    4.00
  21  -4   1   11.60    6.30
  21   4  -1    8.60    5.60
 -21   4   1   15.40    4.90
  21   4  -1    5.70    6.00
  21  -4   1   13.30    6.10
 -21   4   1    7.10    6.20
 -21  -4  -1   17.90    5.30
 -21  -4  -1    9.80    6.10
  21  -4  -1   13.20    6.20
  21   4   1   22.20    8.60
 -21   4  -1   14.80    6.30
 -21  -4   1   20.10    7.00
 -21   4  -1    2.00    7.20
  21   4   1   17.50    6.30
 -21  -4   1   19.80    5.50
 -21   4  -1   20.70    5.40
  21  -4  -1   14.20    6.20
 -22  -4  -1   55.99   10.60
  22  -4   1   26.80    7.80
 -22   4   1   52.59    7.70
 -22  -4  -1   40.30    7.50
 -22   4   1   34.50    8.50
  22   4  -1   44.00    9.50
  22  -4   1   29.10    8.10
  22   4  -1   28.40    9.90
  22   4   1   25.30    7.80
  22   4   1   29.20    9.30
  22  -4  -1   27.20    8.30
  22  -4  -1   33.50    8.50
 -22  -4   1   35.10    8.90
 -22   4  -1   37.70    8.60
 -22   4  -1   40.10   11.30
 -22  -4   1   48.30    7.80
 -22   4  -1   32.40    6.60
  23  -4   1   -1.60    4.10
  23   4  -1    9.00    6.60
  23   4  -1    1.00    4.90
 -23   4   1    7.70    5.20
 -23   4   1   -1.70    3.60
  23  -4   1   -7.60    4.60
 -23  -4  -1    8.90    6.00
 -23  -4  -1    2.80    4.20
 -23   4   1   -3.10    5.30
  23  -4  -1    4.90    5.60
  23   4   1   -5.30    5.70
 -23   4  -1   -2.30    3.80
 -23   4  -1   -6.60    4.70
 -23  -4   1    2.70    4.70
  23   4   1    4.40    5.50
 -23   4  -1   10.40    5.20
  23  -4  -1   16.10    6.90
 -23  -4   1    0.30    3.70
  24   4  -1   20.50   10.10
 -24  -4  -1   49.10   10.20
  24  -4   1   52.29   10.80
  24   4  -1   48.50   10.90
 -24  -4  -1   44.80    8.00
 -24   4   1   40.00    7.40
 -24   4   1   43.00   10.20
  24  -4   1   21.80    8.50
 -24   4   1   26.80   10.70
  24  -4  -1   11.90    8.20
 -24   4  -1   37.70    7.20
 -24   4  -1   35.30    8.90
 -24  -4   1   46.40   10.30
  24   4   1   43.90   10.00
 -24   4  -1   21.00    8.90
  24   4   1   21.50    9.50
  24  -4  -1   27.00    8.80
 -25   4   1   12.60    5.70
  25   4  -1    8.30    7.80
 -25   4   1   14.30    8.90
  25  -4   1   -9.60    7.30
 -25   4   1    9.50    6.60
 -25  -4  -1   24.60    7.80
  25  -4   1    9.90    6.40
  25   4  -1   12.70    7.10
  25   4   1   24.90    8.40
 -25   4  -1   15.20    5.90
  25   4   1    0.00    6.20
 -25  -4   1    6.20    6.50
  25  -4  -1   -8.10    6.30
 -25   4  -1    5.00    4.90
 -25   4  -1    8.00    8.70
  25  -4  -1    0.80    6.50
  26  -4   1   -5.00    5.00
  26   4  -1    9.10    6.40
  26  -4  -1   -7.80    5.50
  26   4   1    8.80    6.10
   0   5   1    0.50    1.10
   0   5  -1    0.00    0.90
   0  -5  -1    0.80    1.10
   0   5   1    1.80    1.20
   0   5   1    1.10    1.00
   0  -5   1    0.80    1.20
   0   5  -1    1.50    1.00
   1  -5   1  133.79    6.90
  -1   5   1  147.99    7.20
  -1  -5  -1  154.38    7.20
   1   5  -1  147.69    6.70
  -1  -5  -1  145.09    6.80
   1   5  -1  150.78    7.30
  -1  -5   1  140.89    6.50
  -1   5  -1  144.49    7.10
  -1  -5   1  136.09    7.10
   1   5   1  157.78    7.40
   1  -5  -1  140.19    7.00
   1   5   1  141.49    6.70
  -1   5  -1  142.99    7.10
   2   5  -1  450.35   17.20
   2   5  -1  437.26   17.00
  -2  -5  -1  407.66   17.70
  -2   5   1  438.16   17.60
  -2  -5  -1  443.16   17.30
   2   5  -1  438.06   17.90
  -2  -5   1  442.06   16.90
  -2   5  -1  443.76   17.60
   2   5   1  433.56   17.30
   2   5   1  435.46   17.90
  -2  -5   1  412.26   17.70
   3   5  -1  136.39    6.80
  -3  -5  -1  131.39    7.20
   3   5  -1  141.29    7.50
  -3  -5  -1  131.99    6.80
   3   5   1  138.69    7.40
  -3  -5   1  142.39    6.60
  -3  -5   1  139.59    7.40
   3   5   1  133.09    6.80
  -4  -5  -1   -0.30    1.30
  -4  -5  -1    0.50    1.20
   4   5  -1    0.40    1.30
   4   5  -1    1.00    1.20
   4   5   1   -0.30    1.40
   4   5   1   -0.10    1.00
  -4  -5   1    1.60    1.40
  -4  -5   1   -0.40    1.20
   5   5  -1  185.18    9.50
  -5  -5  -1  178.48    8.70
  -5  -5  -1  178.58    9.50
   5   5  -1  167.78    8.70
  -5  -5  -1  185.18   11.10
  -5   5  -1  171.88    9.50
  -5   5  -1  179.58    8.90
   5   5   1  170.98    9.30
  -5  -5   1  178.58    9.40
   5   5   1  174.08    8.40
  -5   5  -1  161.98    9.40
  -6  -5  -1   69.59    5.50
  -6  -5  -1   75.09    6.00
   6   5  -1   66.99    5.30
  -6   5   1   67.69    5.70
   6   5  -1   70.99    5.00
  -6   5   1   70.09    5.50
  -6   5   1   66.79    4.70
  -6  -5  -1   64.69    6.30
  -6   5  -1   56.29    5.20
  -6   5  -1   67.09    5.90
  -6  -5   1   68.09    5.60
  -6   5  -1   59.29    4.60
   6   5   1   63.59    5.30
  -7   5   1   38.40    4.90
  -7  -5  -1   31.30    4.40
  -7   5   1   43.90    5.50
   7   5  -1   31.10    4.00
  -7  -5  -1   30.80    3.90
  -7   5   1   34.10    3.70
  -7  -5  -1   31.50    5.70
   7   5  -1   30.90    4.30
   7   5   1   31.70    4.40
  -7   5  -1   29.90    4.40
  -7  -5   1   26.20    4.00
  -7   5  -1   28.40    3.70
  -7   5  -1   42.10    5.50
  -8   5   1   82.39    7.30
  -8  -5  -1   86.29    6.90
  -8   5   1   83.09    5.60
  -8  -5  -1   95.39    8.50
  -8  -5  -1   87.09    6.10
   8   5  -1   81.79    6.50
  -8   5   1   69.39    6.40
   8   5  -1  102.59    7.10
  -8  -5   1   87.49    6.90
  -8   5  -1   85.09    7.70
  -8   5  -1   92.49    6.00
   8   5   1   82.79    6.70
  -8  -5   1   78.69    5.90
  -8   5  -1   85.29    6.80
  -8  -5   1   90.99    7.70
   9  -5   1  231.18   13.30
  -9  -5  -1  240.88   12.20
   9   5  -1  237.38   12.70
  -9   5   1  233.18   12.90
  -9  -5  -1  233.18   15.10
  -9  -5  -1  245.78   13.10
  -9   5   1  230.68   11.40
   9  -5  -1  234.48   13.30
  -9  -5   1  228.38   12.80
  -9   5  -1  230.28   11.60
  -9   5  -1  237.48   13.00
  -9   5  -1  221.68   14.00
  -9  -5   1  218.98   13.80
   9   5   1  219.48   12.10
  10  -5   1   -0.10    2.30
 -10   5   1   -0.20    1.90
  10   5  -1    7.00    3.00
 -10  -5  -1    6.50    2.80
 -10   5   1    3.30    2.00
 -10  -5  -1    2.40    3.00
 -10  -5  -1    1.10    1.80
 -10   5  -1    1.10    2.10
 -10  -5   1    4.00    2.40
 -10  -5   1    5.10    3.20
  10  -5  -1    0.30    2.30
 -10   5  -1    4.00    2.60
 -10   5  -1    5.20    3.30
  10   5   1    0.30    1.80
 -11  -5  -1  194.58   12.50
  11  -5   1  216.98   13.20
 -11   5   1  211.08   11.20
 -11  -5  -1  232.38   11.70
 -11  -5  -1  208.28   14.90
  11   5  -1  193.58   12.40
 -11   5   1  221.68   13.10
 -11   5  -1  203.18   11.30
 -11   5  -1  219.98   14.60
 -11  -5   1  216.68   14.30
  11   5   1  220.18   12.50
 -11  -5   1  212.48   12.80
  11  -5  -1  195.18   13.00
 -11   5  -1  197.28   12.60
 -12   5   1   56.19    7.60
  12  -5   1   57.09    7.80
 -12  -5  -1   58.39    7.30
 -12   5   1   52.09    5.80
 -12  -5  -1   57.69    6.30
 -12  -5  -1   72.49   10.40
  12   5  -1   60.49    7.60
 -12  -5   1   71.89    7.70
  12  -5  -1   64.89    8.30
 -12  -5   1   54.39    7.30
 -12   5  -1   57.39    7.30
 -12  -5   1   54.29    5.90
 -12   5  -1   51.29    5.90
  12   5   1   66.19    7.60
 -12   5  -1   50.09    8.40
 -13  -5  -1   71.29   10.90
 -13  -5  -1   58.59    6.60
 -13  -5  -1   65.79    8.30
  13   5  -1   76.19    9.00
 -13   5   1   71.89    7.50
 -13   5   1   69.49    6.10
  13  -5   1   77.39    9.40
  13   5   1   68.69    8.20
 -13  -5   1   62.19    6.60
 -13  -5   1   66.89    8.50
 -13   5  -1   63.99    6.70
 -13   5  -1   63.09    9.60
 -13  -5   1   65.89    7.80
  13  -5  -1   86.89   10.00
 -13   5  -1   67.89    8.60
 -14  -5  -1   30.20    5.90
 -14  -5  -1   17.30    3.90
  14  -5   1   18.70    5.50
 -14  -5  -1   13.30    5.40
 -14   5   1   20.20    5.10
  14   5  -1   18.60    5.10
 -14   5   1   17.10    3.80
 -14  -5   1   19.30    5.20
 -14   5  -1   14.60    4.60
  14   5   1   16.70    4.90
 -14  -5   1   19.60    5.50
  14  -5  -1   13.80    4.70
 -14  -5   1   11.40    3.20
 -14   5  -1    2.80    4.00
 -14   5  -1   21.20    4.20
 -15  -5  -1  177.78   11.10
  15   5  -1  175.18   12.70
 -15  -5  -1  166.98   14.50
 -15   5   1  166.68   10.60
  15  -5   1  171.28   13.50
 -15  -5  -1  168.88   12.80
 -15   5   1  190.48   13.50
 -15   5  -1  154.78   12.60
 -15  -5   1  223.48   14.70
 -15  -5   1  155.18   10.60
 -15  -5   1  183.18   13.30
  15  -5  -1  186.88   14.00
  15   5   1  175.68   12.40
 -15   5  -1  179.08   11.10
 -15   5  -1  147.39   16.50
  16  -5   1   17.60    5.60
 -16  -5  -1   24.60    5.80
 -16  -5  -1   18.70    4.50
 -16   5   1   31.40    5.20
  16   5  -1   24.00    6.10
 -16  -5  -1   20.00    7.50
 -16   5   1   30.90    7.00
 -16  -5   1   23.90    7.30
 -16  -5   1   20.50    4.60
 -16  -5   1   31.20    7.20
 -16   5  -1   25.00    6.00
 -16   5  -1   10.30    6.40
 -16   5  -1   28.50    5.40
  16   5   1   20.10    5.60
  16  -5  -1   27.00    6.60
 -17   5   1  105.39   12.30
 -17  -5  -1  100.49   10.20
 -17   5   1   94.19    8.30
  17   5  -1   88.49   10.90
  17  -5   1   84.19   11.80
 -17  -5  -1   85.39   13.10
 -17  -5  -1  103.49    8.80
  17   5   1   94.89   11.20
  17  -5  -1   88.09   11.80
 -17  -5   1  102.59   10.50
  17  -5  -1   71.79    9.70
 -17   5  -1   89.39   13.70
 -17  -5   1  100.49    9.80
 -17  -5   1   85.79    9.00
 -17   5  -1   89.49    9.50
 -17   5  -1   90.69   11.40
 -18   5   1   13.30    4.30
  18   5  -1   14.40    5.50
  18  -5   1   14.20    5.80
 -18  -5  -1   -1.00    3.90
 -18   5   1   11.40    5.10
 -18  -5  -1    6.80    3.60
 -18  -5  -1    4.20    3.40
  18  -5   1   10.60    5.20
 -18  -5   1    3.70    3.30
 -18   5  -1    8.90    4.00
 -18  -5   1    6.10    4.80
  18   5   1    3.90    4.20
  18  -5  -1    7.70    4.80
  18  -5  -1   13.20    6.20
 -18   5  -1   30.80    7.20
 -18   5  -1   -4.30    4.00
 -19   5   1   24.20    5.30
 -19  -5  -1   37.80    8.30
  19   5  -1   13.00    5.60
  19  -5   1   24.40    7.20
 -19  -5  -1   21.20    6.50
 -19  -5  -1   17.20    5.20
  19  -5   1   23.50    6.40
 -19   5   1   32.40    8.10
 -19   5  -1   22.50    5.40
 -19   5  -1   24.20    7.00
  19   5   1   32.50    7.70
 -19  -5   1   31.70    5.80
  19  -5  -1   17.60    6.90
 -19   5  -1   26.70    9.40
  19  -5  -1   16.00    5.80
 -19  -5   1   32.00    7.80
  20  -5   1    1.90    4.80
 -20  -5  -1    1.60    4.00
  20   5  -1   -4.60    3.90
 -20  -5  -1   -1.50    4.20
 -20   5   1    0.20    3.00
  20  -5   1    4.90    5.50
 -20   5   1    6.80    4.70
 -20   5  -1   -7.60    3.10
 -20   5  -1   -1.00    2.80
  20  -5  -1    4.20    4.80
  20  -5  -1   -3.70    3.80
  20   5   1   -7.80    3.50
 -20  -5   1    6.40    5.00
 -20   5  -1    2.00    4.70
  21  -5   1   32.50    8.60
 -21  -5  -1   42.40    9.10
  21   5  -1   24.80    7.30
 -21   5   1   24.50    8.00
 -21   5   1   17.00    8.70
 -21  -5  -1   49.99   11.90
 -21  -5  -1   48.30    7.90
  21  -5   1   43.20    8.80
  21   5  -1   13.20    7.30
 -21   5   1   42.80    7.30
  21  -5  -1   37.90    8.70
  21  -5  -1   30.10    8.50
 -21  -5   1   42.40    9.30
 -21   5  -1   20.20    8.30
  21   5   1   38.40    8.50
 -21   5  -1   49.99    7.60
 -21   5  -1   56.89    9.90
 -22   5   1  190.58   16.70
  22  -5   1  155.28   18.90
 -22   5   1  171.78   13.00
 -22   5   1  172.18   21.20
  22   5  -1  188.18   15.80
 -22  -5  -1  213.98   17.20
  22   5  -1  186.48   18.10
  22  -5   1  166.58   17.60
 -22   5  -1  188.88   22.00
 -22  -5   1  171.08   16.10
  22   5   1  121.99   16.90
  22  -5  -1  187.98   16.30
 -22   5  -1  176.08   13.40
  22   5   1  137.79   15.90
 -22   5  -1  189.98   16.40
  22  -5  -1  136.49   18.10
 -23   5   1   93.49   15.90
  23  -5   1   60.59   12.80
  23   5  -1   79.59   12.20
 -23  -5  -1  111.39   14.40
  23  -5   1   82.09   12.60
 -23   5   1  100.79   14.30
 -23   5   1   86.39   10.30
  23   5  -1   62.89   12.40
  23   5   1   77.79   14.00
 -23   5  -1   96.59   13.70
  23  -5  -1   77.59   12.90
 -23   5  -1   77.99   10.30
 -23  -5   1   88.29   13.30
  23  -5  -1   60.69   12.20
  23   5   1   80.29   12.10
 -23   5  -1  104.19   16.80
  24   5  -1    5.00    5.30
  24  -5   1   -3.00    4.60
 -24  -5  -1    1.10    4.10
  24   5  -1   13.90    7.70
 -24   5   1    3.30    5.60
  24  -5   1   -9.30    5.50
 -24   5   1    6.10    4.40
  24   5   1   -9.60    5.60
 -24   5  -1    2.50    5.80
  24   5   1   12.50    6.70
 -24   5  -1   -3.10    5.30
  24  -5  -1   -3.00    5.20
  24  -5  -1   10.10    7.20
 -24   5  -1    4.00    4.00
 -25   5   1   -6.50    3.80
 -25  -5  -1   -0.40    4.70
  25   5  -1   -5.40    5.30
  25  -5   1    4.00    6.20
 -25   5   1   18.00    9.60
  25   5  -1    0.80    4.80
 -25  -5  -1   -7.30    4.00
  25  -5   1    2.00    5.00
 -25   5   1    6.00    4.70
  25  -5  -1   -4.00    4.20
  25   5   1    9.00    6.70
 -25   5  -1   -7.40    3.30
  25  -5  -1    3.70    6.10
  25   5   1   -1.60    7.20
 -25   5  -1    7.20    6.00
 -25   5  -1   -5.30    6.70
 -25  -5   1   14.80    6.40
   0  -6  -1  984.60   39.00
   0   6   1 1062.69   39.20
   0   6  -1 1027.20   38.30
   0   6  -1 1061.79   39.20
   0   6   1  957.80   38.50
   0   6  -1 1032.20   38.60
   0  -6   1 1082.89   39.20
   0   6   1 1040.60   38.40
  -1   6   1  132.89    6.90
   1   6  -1  129.59    6.40
  -1  -6  -1  139.39    7.10
   1   6  -1  119.79    6.90
   1  -6   1  129.59    6.90
   1   6  -1  136.19    6.30
  -1  -6  -1  121.89    6.50
  -1   6  -1  133.49    6.90
   1   6   1  131.59    6.00
   1   6   1  136.59    7.10
  -1   6  -1  130.59    6.90
  -1  -6   1  129.09    7.00
   1   6   1  131.69    6.50
  -2  -6  -1  186.28    8.60
   2   6  -1  170.58    8.30
   2   6  -1  188.58    8.60
   2   6  -1  189.68    9.30
  -2   6   1  194.98    9.10
  -2  -6  -1  182.98    9.10
   2   6   1  193.98    9.40
  -2   6  -1  196.48    9.20
  -2  -6   1  177.98    9.20
   2   6   1  187.38    8.70
   2   6   1  200.38    8.20
  -2  -6   1  182.28    8.30
  -3  -6  -1  157.98    8.20
   3   6  -1  160.48    8.30
   3   6  -1  148.69    7.40
  -3  -6  -1  158.58    7.50
   3   6  -1  147.39    7.30
  -3  -6  -1  159.38   10.00
   3   6   1  146.09    8.20
  -3  -6   1  140.49    7.90
   3   6   1  154.58    7.60
   3   6   1  148.09    7.00
  -3   6  -1  152.28    7.80
  -3  -6   1  142.79    7.10
  -4  -6  -1 1231.18   49.40
   4   6  -1 1361.16   49.90
  -4  -6  -1 1355.16   52.09
   4   6  -1 1313.27   48.80
  -4  -6  -1 1291.37   48.80
   4   6   1 1339.77   49.90
   4   6   1 1291.87   48.20
  -4   6  -1 1378.96   49.90
  -4  -6   1 1233.78   49.50
  -4  -6   1 1227.88   48.40
  -5  -6  -1   55.09    6.20
  -5  -6  -1   51.29    5.80
  -5  -6  -1   50.49    4.60
  -5  -6  -1   50.39    4.20
   5   6  -1   49.30    4.50
   5   6  -1   52.39    4.20
  -5  -6   1   49.10    6.10
   5   6   1   52.19    4.90
  -5   6  -1   50.19    4.70
  -5  -6   1   47.10    4.60
   5   6   1   48.40    3.70
  -5  -6   1   56.09    4.00
  -6  -6  -1   91.29    7.90
  -6  -6  -1   91.99    6.40
  -6  -6  -1   88.59    5.80
  -6   6   1   92.09    5.80
   6   6  -1   85.89    6.30
   6   6  -1   84.09    5.90
  -6  -6  -1   79.69    6.20
  -6   6   1   90.99    6.30
   6   6   1   97.19    5.80
  -6  -6   1   94.29    7.40
  -6  -6   1   89.29    6.40
   6   6   1   91.39    6.50
  -6   6  -1   93.09    6.00
  -6  -6   1   89.89    6.20
  -6   6  -1   75.99    6.30
  -6   6  -1   87.89    6.60
  -7  -6  -1   67.49    5.00
  -7   6   1   54.19    4.60
  -7  -6  -1   63.89    5.40
  -7  -6  -1   63.89    6.70
   7   6  -1   68.59    5.50
   7   6  -1   65.49    5.70
  -7  -6  -1   62.59    5.60
   7   6  -1   67.69    5.30
  -7   6   1   56.99    5.50
  -7   6   1   60.19    5.60
   7   6   1   50.99    5.20
  -7   6  -1   64.99    5.00
  -7  -6   1   66.99    6.60
  -7  -6   1   57.09    5.10
  -7   6  -1   67.39    7.00
  -7  -6   1   60.79    5.60
  -7   6  -1   54.09    5.60
  -7  -6   1   71.69    6.50
   8   6  -1    2.60    2.20
  -8   6   1    7.90    2.80
  -8   6   1    9.30    3.20
  -8  -6  -1   -1.50    1.60
   8   6  -1    2.50    2.00
  -8  -6  -1    4.50    2.00
  -8  -6  -1    6.20    3.50
   8   6  -1    4.70    2.20
  -8   6   1    5.50    2.00
   8   6   1    2.00    1.90
  -8  -6   1    2.80    2.20
  -8   6  -1    3.90    2.50
  -8  -6   1    3.10    2.00
   8  -6  -1    4.60    2.30
  -8   6  -1    1.50    1.70
  -8   6  -1    3.30    2.40
  -8  -6   1    2.80    2.50
   9   6  -1    7.50    2.90
  -9  -6  -1    9.40    4.00
   9  -6   1    7.30    3.20
  -9  -6  -1    2.60    2.00
  -9   6   1    9.00    2.50
  -9   6   1    5.70    2.70
  -9   6   1    9.50    3.40
  -9  -6  -1    9.10    3.20
  -9   6  -1    5.00    2.40
   9   6   1    7.50    2.60
  -9   6  -1   -2.30    2.30
  -9  -6   1    3.10    2.40
  -9  -6   1    1.00    2.10
  -9  -6   1    3.30    3.00
   9  -6  -1    3.20    2.50
  -9   6  -1    5.70    2.70
 -10  -6  -1  155.88   10.70
 -10   6   1  178.08   11.70
 -10  -6  -1  173.68   10.00
 -10   6   1  172.18   11.00
 -10  -6  -1  169.98   12.90
 -10   6   1  169.78    9.50
  10   6  -1  163.68   10.40
  10  -6   1  171.58   11.00
 -10   6  -1  152.78    9.30
 -10   6  -1  179.68   12.30
 -10  -6   1  153.48   10.60
  10   6   1  157.08    9.90
 -10   6  -1  153.18   10.60
  10  -6  -1  170.38   11.30
 -10  -6   1  166.38    9.80
 -10  -6   1  161.08   11.80
  11  -6   1  101.19    8.50
  11   6  -1   99.09    8.00
 -11   6   1  103.69    8.60
 -11   6   1  101.09    7.00
 -11  -6  -1  102.29    7.60
 -11  -6  -1   92.09    8.20
 -11   6   1  110.39    9.50
 -11  -6  -1  102.19   10.30
 -11   6  -1   97.39    7.20
 -11  -6   1  100.79    8.40
 -11  -6   1   98.99    7.50
  11  -6  -1  101.19    8.90
  11   6   1   97.39    7.70
 -11   6  -1   87.49   10.40
 -11  -6   1  101.19    9.60
 -11   6  -1  111.09    8.90
 -12  -6  -1   -0.80    2.20
 -12   6   1    0.50    3.00
  12  -6   1    1.20    2.70
  12   6  -1   -4.60    2.10
 -12   6   1    3.00    2.60
 -12   6   1    2.00    2.20
 -12  -6  -1    3.50    2.60
 -12  -6  -1   -1.60    2.40
 -12  -6   1    2.80    2.40
 -12   6  -1    5.80    3.10
  12   6   1    5.80    2.90
 -12  -6   1    6.80    2.90
 -12  -6   1   11.40    3.80
 -12   6  -1    0.70    3.30
  12  -6  -1   -1.20    2.60
 -12   6  -1    2.10    2.20
 -13   6   1   25.00    4.20
  13  -6   1   34.70    6.40
 -13  -6  -1   41.80    8.10
  13   6  -1   28.80    5.80
 -13  -6  -1   38.50    6.00
 -13   6   1   33.00    6.10
 -13   6   1   25.80    7.10
 -13  -6  -1   42.80    6.90
  13   6   1   28.70    5.30
 -13  -6   1   38.20    6.30
  13  -6  -1   21.60    5.40
 -13   6  -1   37.70    7.50
 -13   6  -1   24.70    4.50
 -13  -6   1   36.30    7.20
 -13   6  -1   35.80    6.10
  14  -6   1   21.20    5.40
  14   6  -1   33.50    6.50
 -14  -6  -1   28.80    7.30
 -14   6   1   29.80    5.90
 -14  -6  -1   26.90    5.20
 -14   6   1   21.70    4.20
 -14   6   1   24.60    6.70
 -14  -6  -1   28.40    5.80
  14  -6  -1   27.50    6.60
 -14   6  -1   28.60    4.70
 -14   6  -1   27.60    6.70
  14   6   1   23.60    5.40
 -14  -6   1   34.80    6.90
 -14   6  -1   30.50    6.30
 -14  -6   1   39.90    7.00
 -15   6   1   52.59    9.60
 -15   6   1   71.69    9.40
  15   6  -1   52.59    8.00
 -15  -6  -1   70.69   11.40
 -15   6   1   63.89    7.10
  15  -6   1   54.29    8.70
 -15  -6  -1   81.59    9.80
 -15   6  -1   65.29    7.50
  15  -6  -1   80.79   10.30
 -15  -6   1   79.49    8.90
 -15   6  -1   90.59   11.90
  15   6   1   72.89    9.10
 -15  -6   1   65.89    9.10
 -15   6  -1   63.79    9.30
 -16   6   1   29.10    8.50
  16  -6   1   14.60    6.10
 -16  -6  -1   35.20    6.70
  16   6  -1   33.10    6.70
 -16   6   1   32.60    5.40
 -16   6   1   27.30    6.40
 -16  -6  -1   44.20    9.60
 -16  -6   1   49.40    8.20
 -16   6  -1   34.00    8.40
  16   6   1   39.10    7.30
 -16   6  -1   35.50    7.40
  16  -6  -1   36.80    7.70
 -16   6  -1   39.40    5.90
 -16  -6   1   25.80    6.30
 -17   6   1   49.70    6.80
  17   6  -1   49.80    8.30
 -17  -6  -1   42.80    7.60
 -17   6   1   45.80    8.40
 -17   6   1   36.80    9.60
 -17   6  -1   41.80    8.20
 -17   6  -1   41.40    9.50
  17   6   1   41.40    7.60
  17  -6  -1   54.09    9.90
 -17   6  -1   35.00    6.30
 -17  -6   1   45.90    8.30
 -17  -6   1   64.79   10.00
 -18  -6  -1   68.89   11.60
 -18   6   1   58.79    7.70
  18  -6   1   17.80    7.70
 -18   6   1   58.19    9.80
 -18  -6  -1   72.89   10.70
 -18   6   1   64.59   11.40
  18   6  -1   51.59    8.80
 -18  -6   1   73.79   11.50
 -18   6  -1   67.29   11.50
 -18  -6   1   60.59    9.80
  18  -6  -1   45.70    9.00
  18  -6  -1   55.49    9.00
 -18   6  -1   48.10    7.40
 -18   6  -1   51.99    8.90
  18   6   1   62.59    9.40
 -19   6   1   14.80    4.40
 -19   6   1   18.00    6.50
 -19   6   1   12.80    6.10
  19   6  -1    4.10    4.30
 -19  -6  -1   10.80    7.20
 -19  -6  -1   14.40    5.60
  19  -6   1    6.20    4.80
 -19   6  -1    8.60    6.50
 -19  -6   1   10.70    5.20
  19  -6  -1   11.20    5.70
  19   6   1   13.70    5.30
  19  -6  -1   14.30    5.40
 -19   6  -1   23.90    6.30
 -19   6  -1   10.00    4.10
 -19  -6   1   18.60    6.00
  20  -6   1  -11.80    4.10
  20  -6   1   10.60    5.40
  20   6  -1    5.70    5.20
 -20   6   1    2.10    3.30
 -20  -6  -1    2.90    4.70
 -20  -6  -1    6.20    3.80
 -20   6   1    2.80    3.70
 -20   6   1   16.10    7.20
  20  -6  -1    5.90    5.30
 -20   6  -1   14.80    5.90
  20  -6  -1   13.40    5.90
 -20  -6   1   23.80    6.80
  20   6   1   10.80    5.50
 -20   6  -1   14.30    7.20
 -20   6  -1    6.80    4.20
 -21   6   1   12.40    7.00
 -21  -6  -1   13.80    6.00
 -21  -6  -1   -2.80    3.70
 -21   6   1    4.60    4.70
  21   6  -1    8.50    5.60
 -21   6   1   -1.10    2.80
  21  -6   1   -6.10    4.30
 -21  -6  -1   -6.60    2.90
  21  -6   1   -6.10    3.40
  21   6   1    6.50    5.40
 -21  -6   1   17.00    5.90
 -21   6  -1   -3.40    2.80
  21  -6  -1   10.30    6.40
 -21   6  -1    2.50    5.60
  21  -6  -1    5.30    5.80
 -21   6  -1   -2.10    3.10
 -22   6   1   16.10    6.30
  22  -6   1   14.60    7.40
  22   6  -1    4.40    5.30
 -22  -6  -1   18.60    7.40
  22   6  -1    5.70    7.80
 -22   6   1   14.60    5.30
  22  -6   1   11.30    5.70
 -22  -6  -1   11.10    5.40
  22   6   1    6.50    5.30
 -22  -6   1    7.50    5.00
 -22  -6   1   10.30    5.00
  22  -6  -1    2.30    5.50
 -22   6  -1    3.20    3.70
 -22   6  -1   13.20    8.50
 -22   6  -1    9.50    5.40
  22  -6  -1    0.60    4.70
 -23  -6  -1   -1.80    4.20
 -23   6   1   22.10    8.40
  23  -6   1    5.10    5.30
  23   6  -1   -2.40    5.40
 -23   6   1   -6.30    3.70
  23   6  -1    0.20    5.10
  23  -6   1   -2.40    5.00
 -23  -6  -1    0.90    3.70
 -23   6   1    2.30    3.90
  23   6   1    5.70    5.20
 -23  -6   1   -1.00    4.00
 -23   6  -1   -2.00    3.80
  23   6   1   -2.90    4.30
  23  -6  -1   -1.10    4.90
 -23   6  -1   -2.00    2.70
 -23  -6   1    8.10    5.50
 -23   6  -1    4.20    7.50
 -24  -6  -1    1.70    4.70
 -24  -6  -1   13.50    6.10
  24   6  -1    8.20    7.40
 -24   6   1   -2.70    3.40
  24  -6   1    0.20    5.50
 -24   6   1    6.80    5.90
  24   6  -1   10.20    6.90
 -24   6   1   -2.90    6.10
  24  -6   1   -0.80    6.10
 -24  -6   1   -1.80    4.40
 -24   6  -1    3.20    8.20
 -24   6  -1    7.70    5.90
 -24   6  -1   -5.80    2.80
  24   6   1    9.50    5.90
  24  -6  -1    6.20    6.30
 -24  -6   1   13.00    7.10
  24   6   1   -1.30    5.80
 -25   6   1    5.20    6.50
 -25   6   1   -5.90    5.80
 -25   6   1    5.00    4.30
 -25  -6  -1   11.20    6.50
  25   6  -1    3.00    6.50
  25  -6   1   -7.00    5.80
  25  -6   1   15.50    7.20
  25   6  -1    3.70    6.50
 -25  -6  -1   -6.30    3.60
  25   6   1   -1.00    7.10
  25   6   1   -2.20    4.20
 -25   6  -1   -2.20    7.40
  25  -6  -1    3.60    7.20
 -25   6  -1   -0.10    4.00
 -25  -6   1    7.10    5.50
 -25  -6   1    5.00    5.60
 -25   6  -1   -6.40    3.80
  25  -6  -1    2.60    8.00
   0   7  -1   -2.40    0.70
   0   7   1    1.30    1.20
   0  -7   1    0.50    1.30
   0   7   1    0.20    1.10
   0  -7  -1    0.80    1.30
   0   7  -1    0.00    1.50
   0   7  -1    1.40    1.30
   0   7   1    1.10    1.20
   0   7  -1   -0.60    0.90
  -1   7   1   10.70    2.20
   1   7  -1   14.50    2.20
   1  -7   1   13.00    2.30
  -1  -7  -1   10.40    2.20
   1   7  -1   14.20    2.60
   1   7  -1   11.80    1.90
   1   7   1   13.50    2.20
  -1   7  -1   13.60    2.40
   1  -7  -1   10.30    2.20
  -1  -7   1   12.70    2.50
   1   7   1   15.00    1.90
  -1   7  -1   13.00    2.40
  -1   7  -1   11.50    2.70
   1   7   1   15.80    2.70
  -2   7   1  993.90   37.50
  -2  -7  -1 1009.20   37.00
  -2  -7  -1  948.01   37.50
   2   7  -1  973.80   36.70
   2   7  -1  967.10   36.50
   2   7  -1  994.30   37.70
   2  -7   1  933.31   37.30
   2   7   1  970.80   36.80
   2   7   1  999.10   37.80
  -2   7  -1  969.00   37.50
  -2  -7   1  916.51   36.40
   2   7   1 1020.90   36.30
  -2  -7   1  924.11   37.40
   3   7  -1   66.99    4.40
   3   7  -1   77.39    5.40
   3   7  -1   67.29    4.40
  -3  -7  -1   64.49    4.50
  -3  -7  -1   69.89    5.20
  -3   7   1   71.19    5.00
  -3   7  -1   73.89    5.00
  -3  -7   1   63.59    5.00
  -3  -7   1   63.89    4.30
  -3   7  -1   67.39    5.10
   3   7   1   75.49    5.40
   3   7   1   68.89    4.20
   3   7   1   71.19    4.80
  -4  -7  -1  185.18    9.40
  -4  -7  -1  157.58    9.00
  -4  -7  -1  177.78   11.20
   4   7  -1  161.28    8.40
   4   7  -1  172.48    9.30
  -4  -7  -1  161.18    8.30
  -4  -7   1  165.58    8.20
   4   7   1  164.28    7.90
  -4  -7   1  149.09    8.90
  -4   7  -1  179.68    9.30
   4   7   1  162.28    8.40
   4   7   1  168.68    9.30
  -5  -7  -1    8.50    2.60
   5   7  -1    5.40    1.90
  -5  -7  -1    7.60    2.40
  -5  -7  -1    5.50    1.80
   5   7  -1    6.30    2.40
  -5  -7  -1    4.60    3.10
  -5  -7   1    9.00    2.20
   5   7   1   11.30    2.00
  -5  -7   1   11.70    2.60
   5   7   1    7.80    2.50
  -5   7  -1   11.50    2.80
  -5  -7   1    7.90    2.90
  -5  -7   1    8.10    2.50
  -6   7   1  284.47   13.70
  -6  -7  -1  291.77   14.20
   6   7  -1  308.07   15.40
  -6  -7  -1  267.57   13.10
   6   7  -1  300.87   13.90
   6   7  -1  284.47   14.10
  -6  -7  -1  278.97   14.20
   6   7  -1  277.37   13.30
  -6  -7  -1  302.47   13.40
  -6  -7  -1  292.67   16.30
   6  -7  -1  273.17   17.30
  -6  -7   1  281.67   13.90
  -6  -7   1  275.97   13.00
  -6  -7   1  288.27   15.60
  -6   7  -1  275.47   14.20
   6   7   1  278.57   12.80
  -6  -7   1  272.07   14.10
  -6   7  -1  290.87   13.50
   6   7   1  298.97   14.50
  -7  -7  -1   45.90    4.80
  -7  -7  -1   45.40    4.80
   7   7  -1   39.90    5.30
  -7  -7  -1   42.50    6.90
  -7  -7  -1   45.10    5.50
   7   7  -1   50.89    5.60
   7   7  -1   41.90    4.90
  -7   7   1   47.90    5.10
  -7  -7  -1   38.30    5.00
  -7   7   1   54.59    5.80
  -7  -7   1   43.40    5.50
  -7  -7   1   53.89    6.10
  -7  -7   1   41.20    5.10
  -7  -7   1   54.49    5.20
   7   7   1   45.40    4.20
  -7   7  -1   47.70    6.20
  -7  -7   1   49.40    4.40
  -7   7  -1   53.49    6.20
   7   7   1   49.20    5.80
  -7   7  -1   46.60    5.10
  -8   7   1    5.40    2.30
  -8  -7  -1    8.80    2.80
  -8   7   1    7.80    3.30
   8   7  -1    7.00    2.80
  -8  -7  -1    1.20    3.10
  -8   7   1    3.70    2.70
  -8  -7  -1    8.50    3.20
   8   7  -1    7.00    2.70
  -8  -7  -1    2.90    2.00
  -8  -7   1    2.90    2.30
   8   7   1    6.30    2.60
  -8   7  -1    3.30    2.90
  -8   7  -1    6.90    2.40
   8  -7  -1    5.10    2.90
  -8  -7   1    6.10    2.40
  -8   7  -1    6.40    3.00
  -8  -7   1    4.70    2.30
  -8  -7   1    6.70    3.50
  -9  -7  -1   75.69    6.90
   9   7  -1   88.19    7.00
  -9   7   1   83.09    7.20
  -9  -7  -1   80.69    8.50
  -9   7   1   78.69    7.30
   9   7  -1   78.99    6.50
  -9  -7  -1   89.09    6.50
  -9   7   1   85.59    6.10
   9  -7   1   76.69    6.90
  -9   7  -1   86.29    7.60
  -9  -7   1   89.99    6.40
   9  -7  -1   85.49    7.30
  -9  -7   1   80.59    7.20
  -9   7  -1   79.09    7.10
   9   7   1   91.89    6.80
  -9   7  -1   89.19    6.40
  -9  -7   1   80.09    8.00
 -10   7   1    6.50    3.30
 -10  -7  -1    4.60    3.50
 -10   7   1    6.50    2.30
 -10   7   1    5.70    3.00
  10  -7   1   10.50    3.60
  10   7  -1    3.80    2.80
 -10  -7  -1   -1.60    2.10
 -10  -7  -1    6.60    2.80
 -10   7  -1    7.10    3.80
 -10   7  -1    3.70    2.50
 -10  -7   1    8.70    2.90
  10   7   1    6.90    2.80
 -10   7  -1    6.70    2.80
 -10  -7   1    5.40    2.80
  10  -7  -1    4.00    3.30
 -10  -7   1    5.90    2.90
 -11  -7  -1   -0.90    1.90
 -11   7   1    4.60    3.80
  11  -7   1    7.00    3.10
 -11   7   1    4.30    2.50
 -11  -7  -1    4.20    2.60
 -11   7   1    2.00    2.00
  11   7  -1    1.70    2.30
 -11  -7  -1    2.20    3.40
 -11   7  -1    5.80    2.70
 -11  -7   1    6.40    3.20
  11   7   1    2.90    2.40
 -11  -7   1    1.30    3.00
  11  -7  -1    6.50    3.20
 -11   7  -1    3.70    2.80
 -11   7  -1    3.60    3.20
 -11  -7   1    3.70    2.30
  12  -7   1  126.19    9.80
 -12   7   1  118.89   10.30
 -12  -7  -1  103.49   11.10
  12   7  -1  121.29    9.10
 -12   7   1  109.99    9.30
 -12  -7  -1  115.59    8.70
 -12   7   1  110.69    8.00
 -12  -7  -1  115.99    9.60
 -12   7  -1  130.69   11.00
  12  -7  -1  108.99    9.50
 -12  -7   1  119.09   10.00
 -12  -7   1  111.79   10.60
 -12   7  -1  107.19    8.00
 -12  -7   1  106.79    8.30
  12   7   1  115.39    8.70
 -12   7  -1  128.49    9.80
 -13   7   1    3.00    4.00
 -13   7   1    7.70    3.50
 -13   7   1    0.60    2.20
 -13  -7  -1    4.30    3.20
  13  -7   1   -6.50    2.60
 -13  -7  -1    4.20    3.80
  13   7  -1    0.60    2.90
 -13  -7  -1    2.20    2.40
 -13   7  -1    0.70    2.40
  13  -7  -1    6.90    4.30
 -13  -7   1   -0.40    2.10
 -13   7  -1    2.00    2.60
 -13  -7   1    2.20    3.30
 -13   7  -1    7.00    4.30
  13   7   1    1.60    2.70
 -13  -7   1   10.20    3.90
 -14   7   1    2.70    3.00
  14   7  -1    5.10    3.30
 -14  -7  -1    1.60    2.70
 -14   7   1    5.90    3.10
  14  -7   1   -7.60    2.70
 -14  -7  -1    1.10    2.60
 -14  -7  -1    1.50    3.50
 -14   7   1    6.90    4.20
 -14   7  -1    2.50    3.10
 -14  -7   1    6.50    3.70
 -14   7  -1    7.60    5.20
  14   7   1    5.90    3.50
  14  -7  -1   -0.40    3.60
 -14  -7   1    1.50    2.50
 -14  -7   1    2.60    3.40
 -14   7  -1    2.10    2.80
 -15   7   1   43.00    8.50
 -15   7   1   32.00    6.60
 -15  -7  -1   31.70    5.80
 -15  -7  -1   47.50    9.30
 -15   7   1   24.10    4.80
 -15  -7  -1   30.30    6.30
  15  -7   1   22.00    6.20
  15   7  -1   25.60    6.20
 -15   7  -1   26.80    7.60
  15  -7  -1   28.10    7.00
 -15   7  -1   32.30    5.40
 -15  -7   1   51.19    9.10
 -15  -7   1   29.10    6.30
 -15  -7   1   28.20    5.50
  15   7   1   28.60    6.30
 -15   7  -1   28.20    5.90
 -16   7   1   86.39   12.30
  16   7  -1   74.29    9.80
 -16  -7  -1   99.69   11.60
 -16   7   1   87.79    9.10
 -16  -7  -1   75.09    9.20
  16  -7   1   67.89   10.00
 -16   7   1   89.79   11.50
 -16  -7  -1   70.19   10.20
  16   7   1   75.99    9.50
 -16  -7   1   90.89    9.70
 -16   7  -1   88.49    9.00
 -16   7  -1   89.79   12.90
 -16  -7   1  112.69   10.20
  16  -7  -1   75.09   11.10
 -16   7  -1   87.79   11.00
 -16  -7   1   93.19   11.40
 -17  -7  -1   15.30    5.30
 -17  -7  -1   19.00    6.00
 -17   7   1   13.70    6.40
 -17   7   1   11.20    3.90
  17  -7   1   22.50    6.70
  17   7  -1   17.50    6.00
 -17   7   1   26.90    6.80
 -17  -7  -1   28.90    7.30
  17   7   1   16.90    5.70
  17  -7  -1   16.70    6.10
 -17   7  -1   21.30    6.20
 -17   7  -1   11.30    6.60
 -17  -7   1   41.70    7.50
 -17   7  -1   21.30    5.20
 -17  -7   1   15.10    4.90
 -17  -7   1   23.80    6.40
 -18  -7  -1   58.89    9.80
 -18   7   1   51.49    7.40
 -18  -7  -1   56.59    8.60
 -18   7   1   71.69   10.90
 -18   7   1   57.49   10.70
  18   7  -1   59.89    9.40
  18  -7   1   42.00    8.70
  18  -7  -1   31.30    8.00
  18   7   1   61.39    9.50
 -18  -7   1   48.10    9.00
 -18   7  -1   44.50   10.30
 -18   7  -1   54.99    7.60
 -18   7  -1   50.39    9.10
 -18  -7   1   65.49    8.90
 -19  -7  -1    6.80    3.90
  19   7  -1    2.20    4.50
 -19   7   1    4.50    3.40
 -19   7   1   -2.70    4.10
 -19  -7  -1    0.70    3.40
  19  -7   1    4.80    5.00
 -19   7   1    4.70    5.20
 -19  -7  -1    4.70    4.90
 -19  -7   1    6.30    4.60
 -19   7  -1   20.00    7.30
 -19  -7   1    9.20    4.60
 -19   7  -1   -1.10    2.80
  19   7   1    2.30    3.90
  19  -7  -1   -4.60    4.40
 -19   7  -1    0.90    3.80
  19  -7  -1    3.20    4.40
 -19  -7   1   -3.80    3.10
 -20   7   1   22.60    7.00
 -20  -7  -1    6.10    4.90
 -20   7   1   12.20    4.40
 -20   7   1   20.20    8.30
 -20  -7  -1   36.20    7.70
  20   7  -1   10.10    5.40
  20  -7   1   26.40    6.70
 -20  -7  -1   11.50    4.80
  20  -7   1   11.00    6.40
 -20   7  -1   15.00    4.90
 -20  -7   1   13.20    5.70
 -20   7  -1   24.40    7.10
  20   7   1   13.30    5.40
 -20  -7   1    8.90    4.60
  20  -7  -1    9.30    6.50
 -20   7  -1   15.70    7.60
  20  -7  -1   18.20    6.80
 -21  -7  -1   58.59   11.10
 -21   7   1   53.99   12.60
  21   7  -1   60.69   10.70
 -21   7   1   63.59   11.10
 -21   7   1   68.69    9.10
 -21  -7  -1   47.70    8.70
  21  -7   1   69.29   11.20
  21  -7   1   52.39   10.30
 -21   7  -1   60.19   10.30
  21   7   1   53.29    9.60
  21  -7  -1   71.99   10.70
  21  -7  -1   71.79   11.40
 -21  -7   1   57.59   10.90
 -21   7  -1   67.29    9.00
 -21   7  -1   54.09   12.40
 -21  -7   1   59.69    9.50
  22  -7   1   68.89   11.30
 -22  -7  -1   74.59   11.00
 -22  -7  -1   85.19   12.80
  22  -7   1   70.49   12.80
 -22   7   1   93.69   10.80
 -22   7   1  100.89   14.30
 -22   7   1   49.90   13.20
  22   7  -1   76.99   11.60
 -22  -7   1   69.69   12.30
 -22   7  -1   82.29   15.30
  22  -7  -1   58.59   11.10
  22  -7  -1   81.99   13.70
 -22  -7   1   70.99   10.40
 -22   7  -1   99.49   14.70
  22   7   1   80.79   12.00
 -22   7  -1   82.19   10.10
 -23   7   1   16.50    9.60
  23  -7   1   15.90    7.70
  23   7  -1   33.40   10.40
 -23  -7  -1   38.80   10.10
  23   7  -1   17.30    7.80
 -23   7   1   23.50    8.10
 -23   7   1   31.00    7.10
  23  -7   1    9.20    7.80
 -23  -7  -1   28.00    7.40
 -23   7  -1   25.00    6.30
  23  -7  -1   21.60    8.00
 -23  -7   1   30.00    8.40
  23   7   1   16.10    6.70
 -23   7  -1   11.60    6.70
 -23  -7   1   12.10    6.30
 -23   7  -1   17.40    8.90
  23  -7  -1   25.10    8.70
  24  -7   1    8.00    7.70
  24   7  -1    3.00    7.30
 -24   7   1   17.70    6.00
 -24   7   1   -0.90    6.00
  24  -7   1    3.80    5.00
  24   7  -1    2.40    6.30
 -24   7   1    8.30    8.40
 -24  -7  -1   -2.20    3.90
 -24  -7  -1   15.10    6.50
 -24  -7   1    9.10    5.30
 -24   7  -1   15.50    5.50
  24   7   1    0.70    5.20
 -24   7  -1   14.40    7.00
  24   7   1    5.40    6.80
  24  -7  -1    0.90    5.00
 -24   7  -1    9.20    8.20
  24  -7  -1   -0.90    5.20
 -24  -7   1    1.80    4.90
  25   7  -1    3.80    5.90
 -25  -7  -1   -3.80    4.60
 -25   7   1   12.20    5.50
 -25   7   1   -2.90    5.20
  25   7  -1   -9.50    5.10
 -25   7   1    9.80    8.80
  25  -7   1   17.70    8.00
  25  -7   1    2.40    7.60
 -25  -7  -1    1.20    4.20
 -25   7  -1    5.20    4.80
  25  -7  -1   -0.40    5.20
  25   7   1   17.00    9.40
 -25   7  -1    2.00    6.60
  25   7   1    1.50    6.20
 -25  -7   1    4.90    5.80
 -25  -7   1    0.00    4.60
  25  -7  -1    9.70    7.50
 -25   7  -1   -2.00    3.60
   0  -8   1  184.88    9.40
   0   8   1  196.38    9.10
   0   8   1  177.88    8.60
   0   8  -1  170.58    8.50
   0   8  -1  169.08    9.30
   0   8   1  203.58    9.70
   0   8  -1  175.48    8.70
   0  -8  -1  187.98    9.40
   0   8  -1  170.88    9.20
   1  -8   1   12.00    2.40
  -1   8   1   14.90    2.80
  -1  -8  -1   18.50    3.00
   1   8  -1   14.20    2.80
   1   8  -1   14.50    2.20
   1   8  -1   15.50    2.40
  -1  -8   1   13.50    2.70
   1   8   1   18.10    3.00
  -1   8  -1   11.60    2.50
   1   8   1   19.30    2.60
   1   8   1   17.10    2.20
  -1   8  -1   10.60    2.40
  -1   8  -1   16.60    2.70
   1  -8  -1   14.60    2.80
  -2  -8  -1   24.70    3.60
  -2  -8  -1   25.60    3.30
   2  -8   1   23.50    3.50
  -2   8   1   25.50    3.50
  -2  -8  -1   23.80    3.50
   2   8  -1   21.70    3.30
   2   8  -1   24.70    2.90
   2   8  -1   25.60    3.00
   2  -8   1   24.30    3.30
   2   8   1   20.60    3.30
  -2  -8   1   22.60    2.80
  -2   8  -1   26.20    3.30
   2   8   1   24.80    2.40
  -2  -8   1   28.20    3.70
   2   8   1   22.70    2.90
  -2  -8   1   29.20    4.00
  -2   8  -1   24.90    3.40
  -3  -8  -1    0.20    1.40
   3   8  -1    0.10    1.50
  -3  -8  -1   -1.40    1.10
   3  -8   1    3.10    1.70
   3   8  -1    3.80    1.60
  -3   8   1    0.30    1.30
  -3  -8  -1   -2.20    0.90
   3   8  -1    0.30    1.20
  -3   8  -1    2.60    1.70
  -3  -8   1   -2.60    0.80
   3   8   1    0.20    1.00
   3   8   1   -0.10    1.40
   3  -8  -1    0.20    1.30
  -3   8  -1    1.30    1.60
  -3  -8   1    1.90    1.40
   3   8   1   -0.80    1.30
  -3  -8   1   -0.80    1.50
   4   8  -1  155.18    8.50
   4   8  -1  158.48    8.40
   4   8  -1  171.48    9.60
  -4  -8  -1  161.08   11.40
  -4  -8  -1  160.48    8.50
   4  -8   1  171.28    9.40
  -4   8   1  167.58    9.10
  -4  -8  -1  158.18    9.30
   4   8  -1  165.38   10.10
  -4  -8  -1  173.88    9.50
  -4   8  -1  180.98    9.40
   4  -8  -1  166.88    9.20
   4   8   1  173.88    9.80
   4   8   1  162.68    8.70
   4   8   1  176.18    8.20
  -4  -8   1  162.58    8.20
  -4   8  -1  169.88    9.20
  -4  -8   1  160.28    9.40
  -4  -8   1  178.48    9.50
   5   8  -1   37.70    4.40
  -5  -8  -1   27.00    3.80
  -5  -8  -1   31.20    5.70
  -5  -8  -1   32.30    4.40
   5   8  -1   32.60    3.90
  -5  -8  -1   35.20    3.90
  -5  -8  -1   30.20    4.30
   5   8  -1   33.20    4.20
  -5   8   1   34.70    4.10
   5   8  -1   34.70    4.60
   5   8   1   26.60    4.20
  -5   8  -1   37.30    4.70
  -5  -8   1   30.90    3.80
  -5  -8   1   36.00    4.50
  -5  -8   1   25.20    3.90
   5   8   1   30.30    3.40
   5   8   1   28.40    3.90
  -5  -8   1   29.30    5.30
  -5   8  -1   34.70    3.80
   5  -8  -1   45.40    5.00
   6   8  -1  686.43   27.10
  -6  -8  -1  618.14   26.40
  -6   8   1  671.63   25.90
   6   8  -1  606.94   25.40
  -6  -8  -1  558.44   28.70
   6   8  -1  614.14   25.40
  -6  -8  -1  619.74   25.40
  -6  -8  -1  612.84   26.40
  -6  -8  -1  599.94   25.20
   6   8  -1  645.24   26.00
  -6  -8   1  628.94   25.20
   6  -8  -1  590.14   29.40
  -6  -8   1  634.34   26.40
  -6   8  -1  622.44   26.40
  -6  -8   1  591.94   28.20
   6   8   1  600.14   27.00
  -6  -8   1  565.54   26.30
   6   8   1  626.54   24.90
  -6  -8   1  612.94   25.00
   6   8   1  614.34   25.70
  -7   8   1   74.89    6.10
   7   8  -1   94.59    6.70
  -7  -8  -1   75.59    7.90
   7   8  -1   78.09    6.00
  -7  -8  -1   78.69    5.80
  -7  -8  -1   80.29    5.90
  -7  -8  -1   81.69    6.60
  -7  -8  -1   83.79    6.80
   7   8  -1   79.59    6.00
  -7   8   1   81.19    6.00
  -7   8  -1   81.89    6.90
   7   8   1   73.99    5.60
  -7  -8   1   71.49    6.40
  -7  -8   1  101.19    7.20
  -7  -8   1   79.09    5.60
  -7  -8   1   68.59    7.30
   7   8   1   78.19    5.80
  -7   8  -1   83.09    6.20
  -7  -8   1   70.09    5.40
   7  -8  -1   84.59    6.80
   7   8   1   83.79    6.30
  -8   8   1    3.80    2.10
   8   8  -1    3.90    2.30
   8   8  -1    1.20    2.00
  -8  -8  -1    4.80    2.10
  -8   8   1    6.00    2.80
  -8   8   1    6.90    2.80
  -8  -8  -1    2.80    1.80
   8   8  -1    9.10    2.80
  -8  -8  -1    0.30    1.70
  -8  -8  -1    2.70    2.30
  -8  -8  -1    7.40    3.20
  -8   8  -1   -2.00    1.80
   8   8   1   -0.50    1.70
  -8   8  -1    1.40    2.10
  -8  -8   1    1.80    2.60
  -8  -8   1    1.80    2.10
   8  -8  -1   -0.80    2.00
  -8  -8   1    3.60    2.00
  -8   8  -1   -3.90    1.60
   8   8   1    4.10    2.10
  -8  -8   1   -2.30    1.30
  -8  -8   1    0.30    1.80
   9  -8   1   31.90    5.00
  -9   8   1   22.70    4.60
  -9  -8  -1   21.10    4.30
   9   8  -1   30.90    4.50
  -9  -8  -1   32.30    4.50
  -9  -8  -1   28.30    6.10
  -9   8   1   28.50    4.20
   9   8  -1   32.90    5.00
  -9   8   1   36.70    5.50
  -9  -8  -1   21.00    3.80
   9  -8  -1   29.60    5.30
  -9   8  -1   27.00    4.40
  -9   8  -1   30.60    5.00
  -9   8  -1   23.20    4.70
   9   8   1   33.10    4.70
  -9  -8   1   23.00    4.50
  -9  -8   1   30.70    6.10
  -9  -8   1   33.50    4.50
  -9  -8   1   35.40    5.10
 -10  -8  -1   21.20    6.00
 -10   8   1   15.30    4.40
 -10  -8  -1   21.50    3.90
 -10   8   1   12.10    3.30
  10   8  -1   22.60    4.40
 -10   8   1   16.90    4.60
 -10  -8  -1    6.30    3.40
  10  -8   1   16.00    4.20
 -10   8  -1   16.50    3.60
  10  -8  -1   22.90    4.60
 -10  -8   1   16.80    3.50
 -10   8  -1   17.80    4.50
  10   8   1   17.90    3.80
 -10   8  -1   19.10    4.50
 -10  -8   1   14.60    3.90
 -10  -8   1   24.90    5.80
 -11   8   1    9.20    2.90
 -11  -8  -1    7.30    3.20
  11   8  -1   11.50    3.90
 -11   8   1   -1.10    2.70
  11  -8   1   12.40    3.90
 -11  -8  -1    6.60    4.00
 -11   8   1   11.60    3.90
 -11  -8  -1    9.20    3.10
 -11   8  -1   16.10    4.60
 -11   8  -1   15.00    3.50
 -11  -8   1   12.90    3.60
  11   8   1   14.00    3.70
 -11  -8   1   12.60    3.50
  11  -8  -1    6.80    3.30
 -11  -8   1   16.40    5.00
 -11   8  -1   15.90    4.10
 -12  -8  -1   14.40    3.80
 -12   8   1   20.20    4.90
 -12  -8  -1   13.80    5.40
  12  -8   1    8.30    4.10
  12   8  -1   12.50    3.80
 -12   8   1   13.10    4.10
 -12   8   1   14.10    3.40
 -12  -8  -1    8.40    4.00
 -12   8  -1   14.10    5.10
  12   8   1   12.30    4.00
 -12  -8   1    5.70    2.60
 -12   8  -1   14.40    3.60
 -12  -8   1   10.50    4.20
 -12  -8   1   18.40    5.50
  12  -8  -1   15.40    4.70
 -12   8  -1    7.20    3.80
 -13  -8  -1  191.78   16.00
 -13  -8  -1  191.98   13.60
 -13  -8  -1  208.38   12.40
 -13   8   1  184.98   11.40
 -13   8   1  210.18   14.90
  13   8  -1  221.48   13.30
  13  -8   1  191.58   13.30
 -13   8   1  215.78   13.90
  13   8   1  199.88   12.60
 -13  -8   1  195.68   13.90
 -13  -8   1  201.68   12.20
 -13   8  -1  182.18   11.60
 -13   8  -1  219.28   15.30
  13  -8  -1  199.58   13.70
 -13   8  -1  201.68   13.90
 -13  -8   1  191.48   15.10
 -14  -8  -1   21.00    4.70
  14   8  -1   20.60    5.00
 -14   8   1   18.90    4.20
 -14  -8  -1   27.70    6.30
 -14   8   1   31.40    7.00
 -14  -8  -1   24.10    7.10
 -14   8   1   18.40    5.00
  14  -8   1   32.80    6.60
 -14   8  -1   24.50    5.80
  14   8   1   23.30    5.20
 -14   8  -1   25.30    4.90
 -14   8  -1   19.90    6.30
 -14  -8   1   38.90    8.10
 -14  -8   1   28.70    5.20
  14  -8  -1   24.30    6.10
 -14  -8   1   27.80    6.30
  15  -8   1   94.99   11.30
 -15   8   1  107.89    8.70
 -15   8   1   97.59   10.00
  15   8  -1  101.19   11.20
 -15   8   1   99.39   12.40
 -15  -8  -1  128.29   13.10
 -15  -8  -1  114.69    9.30
 -15  -8  -1  132.09   11.20
  15  -8  -1  118.69   11.30
 -15   8  -1  101.99    8.90
 -15  -8   1  111.89    9.10
 -15  -8   1   92.99   10.70
 -15  -8   1  110.89   11.00
 -15   8  -1  110.79   10.70
 -15   8  -1  107.59   13.30
  15   8   1   95.29   10.50
 -16   8   1  194.68   16.30
  16  -8   1  196.98   15.10
 -16  -8  -1  233.68   18.60
 -16   8   1  195.08   12.70
 -16   8   1  205.38   15.10
 -16  -8  -1  194.18   13.60
 -16  -8  -1  186.08   14.80
  16   8  -1  193.78   14.10
 -16   8  -1  237.28   18.00
 -16  -8   1  229.68   16.50
  16   8   1  211.08   14.40
 -16   8  -1  212.38   15.40
  16  -8  -1  218.38   15.80
 -16   8  -1  215.38   13.20
 -16  -8   1  192.38   13.40
 -16  -8   1  221.08   15.90
 -17   8   1  372.26   24.40
 -17  -8  -1  367.36   20.70
 -17   8   1  403.86   23.40
  17  -8   1  333.27   22.10
 -17  -8  -1  429.06   26.50
 -17  -8  -1  368.16   22.90
 -17   8   1  360.46   19.60
  17   8  -1  365.26   21.60
  17  -8  -1  400.96   23.60
 -17   8  -1  432.16   23.70
 -17  -8   1  415.36   24.90
 -17   8  -1  391.96   20.30
 -17  -8   1  399.86   23.40
 -17   8  -1  398.56   25.30
 -17  -8   1  353.96   20.30
  17   8   1  373.26   21.40
 -18   8   1  130.09   15.90
  18  -8   1  133.99   14.70
 -18   8   1  106.49    9.30
  18   8  -1  106.19   12.40
 -18   8   1  129.99   12.70
 -18  -8  -1  110.59   13.60
 -18  -8  -1  107.59   11.80
 -18  -8  -1  134.79   13.50
 -18  -8   1  114.99   12.10
 -18  -8   1  118.19   10.40
  18   8   1  110.19   12.30
  18  -8  -1  113.69   13.90
 -18   8  -1  106.69    9.50
 -18   8  -1  120.89   15.60
 -18   8  -1  112.99   11.70
 -19  -8  -1   34.10    7.20
 -19   8   1   44.70   10.10
 -19   8   1   39.00    8.90
  19   8  -1   30.20    7.20
 -19  -8  -1   30.40    8.30
  19  -8   1   37.70    9.10
 -19   8   1   35.90    6.70
 -19   8  -1   43.00    8.90
  19   8   1   43.80    8.30
 -19  -8   1   43.50    8.90
 -19  -8   1   38.00    7.10
  19  -8  -1   43.00    9.10
 -19   8  -1   33.70    6.40
 -19   8  -1   55.69   10.90
 -20  -8  -1   24.70    6.80
  20  -8   1    7.60    5.60
 -20  -8  -1    0.60    4.70
 -20   8   1   12.00    6.50
  20   8  -1    1.80    4.10
 -20  -8  -1    6.20    4.60
 -20   8   1    0.90    5.30
 -20   8   1    7.30    4.10
 -20   8  -1   10.90    4.90
 -20   8  -1    7.00    6.50
 -20   8  -1    2.70    4.40
  20  -8  -1    2.60    4.40
 -20  -8   1    3.00    4.60
  20  -8  -1    4.40    5.70
 -20  -8   1    5.90    4.00
  20   8   1   15.50    5.80
 -21   8   1    0.30    3.00
  21  -8   1    2.10    4.40
  21  -8   1   -0.40    4.90
  21   8  -1    6.60    5.30
 -21  -8  -1    0.10    4.50
 -21   8   1    9.00    6.60
 -21  -8  -1   -5.20    2.70
 -21   8   1    9.70    5.60
  21  -8  -1    5.40    6.10
  21  -8  -1   13.30    6.30
 -21  -8   1    1.70    3.90
 -21   8  -1    4.70    6.70
 -21   8  -1   -1.10    2.80
 -21  -8   1    4.90    5.20
 -21   8  -1    2.20    4.60
  21   8   1    4.30    4.50
 -22   8   1    7.40    4.30
 -22  -8  -1    6.90    4.90
  22  -8   1    6.20    5.80
  22   8  -1    3.10    4.80
 -22   8   1   -0.30    6.20
 -22   8   1   -0.70    4.30
  22  -8   1    9.20    5.70
 -22  -8  -1    5.80    5.00
 -22  -8   1    6.10    5.20
 -22  -8   1    3.50    4.80
 -22   8  -1    1.20    3.60
 -22   8  -1    3.70    6.10
  22  -8  -1    4.00    5.80
 -22   8  -1   -2.60    2.90
  22  -8  -1    0.80    4.90
  22   8   1    7.30    5.40
 -23   8   1   14.80    7.50
 -23   8   1   17.30    8.40
 -23   8   1   13.70    5.40
  23  -8   1   11.20    6.60
  23   8  -1   10.30    6.30
  23  -8   1   18.30    8.10
 -23  -8  -1    7.90    5.30
 -23  -8  -1   22.90    6.90
  23   8   1    5.60    5.10
  23  -8  -1   14.60    7.20
  23  -8  -1    2.40    5.20
 -23  -8   1   23.30    7.40
 -23   8  -1   18.00    7.70
 -23   8  -1   13.90    5.20
 -23  -8   1    9.40    5.10
 -23   8  -1   -8.00    7.40
 -24   8   1    9.00    7.30
 -24  -8  -1   10.10    7.10
  24   8  -1   19.30    8.80
 -24  -8  -1   17.60    6.60
  24  -8   1    6.60    6.50
 -24   8   1   15.50    8.50
  24  -8   1    1.40    5.90
 -24   8   1   18.10    5.80
  24   8  -1   14.60    6.50
  24  -8  -1   17.80    8.00
 -24   8  -1    4.00    6.00
 -24   8  -1    9.60    8.70
 -24  -8   1   24.60    7.60
 -24  -8   1   18.60    6.50
 -24   8  -1   11.60    5.20
  24   8   1   13.40    6.90
  24  -8  -1   20.70    8.60
 -25   8   1   12.10    7.20
 -25  -8  -1   -9.50    5.30
  25   8  -1    1.80    6.50
  25  -8   1    6.50    6.10
  25   8  -1    4.80    6.30
 -25   8   1    5.20    7.50
 -25   8   1   11.50    5.30
  25  -8   1   11.30    7.30
 -25  -8  -1    2.30    4.70
  25   8   1    0.40    5.30
  25  -8  -1    2.80    6.70
  25  -8  -1   -2.90    6.40
 -25   8  -1   20.30    8.30
 -25   8  -1   11.60    5.10
 -25   8  -1    5.70    8.40
 -25  -8   1   13.40    6.30
 -25  -8   1   25.20    7.80
  25   8   1    5.00    8.50
   0  -9  -1    2.50    1.70
   0   9  -1   -0.40    1.10
   0  -9   1    0.60    1.60
   0   9  -1   -1.90    1.20
   0   9   1    0.10    1.00
   0  -9   1    1.40    1.60
   0   9   1   -0.40    1.30
   0   9  -1    1.50    1.50
   0  -9  -1   -0.90    1.20
   0   9   1   -1.80    1.00
  -1   9   1  102.19    5.90
   1  -9   1   80.69    6.00
   1   9  -1   90.09    6.40
  -1  -9  -1   95.39    6.50
  -1   9   1   98.19    6.50
  -1  -9  -1   88.39    6.20
   1   9  -1   94.69    5.50
   1  -9   1   88.69    6.30
  -1   9   1   85.69    5.70
   1   9  -1   92.69    5.50
  -1  -9   1   85.19    6.20
  -1   9  -1   93.79    6.40
   1   9   1   94.19    5.30
   1   9   1   99.49    6.60
   1  -9  -1   86.69    6.20
   1  -9  -1   94.99    6.00
   1  -9  -1   87.59    6.10
  -1   9  -1   91.09    5.90
   1   9   1   85.19    5.60
  -1   9  -1   89.39    6.10
  -1  -9   1   95.39    6.50
   2   9  -1  240.58   11.00
   2   9  -1  251.07   12.20
   2  -9   1  246.48   12.10
  -2  -9  -1  216.98   11.00
   2  -9   1  233.38   12.40
  -2  -9  -1  230.18   11.80
  -2   9   1  233.58   11.90
   2   9  -1  237.08   10.90
  -2   9   1  218.68   11.60
  -2  -9  -1  240.48   12.10
  -2  -9  -1  241.08   11.40
   2   9   1  211.58   10.90
  -2  -9   1  233.98   12.00
  -2   9  -1  220.28   11.60
  -2   9  -1  248.38   12.00
   2   9   1  252.87   12.30
   2  -9  -1  242.98   11.90
   2  -9  -1  241.98   11.30
  -2  -9   1  242.78   11.00
  -2   9  -1  245.78   11.60
  -2  -9   1  227.58   12.00
   2   9   1  245.28   10.70
   3   9  -1  469.65   19.20
   3   9  -1  473.45   19.60
  -3  -9  -1  434.66   22.50
   3   9  -1  477.05   20.60
  -3  -9  -1  454.15   20.20
  -3   9   1  465.15   20.10
   3   9  -1  487.25   19.90
   3   9  -1  469.75   19.10
  -3  -9  -1  449.66   19.20
  -3  -9  -1  469.65   19.50
  -3  -9  -1  491.55   20.90
   3  -9   1  450.55   20.10
   3   9   1  459.45   18.60
  -3   9  -1  400.46   19.80
  -3  -9   1  472.65   19.00
  -3  -9   1  435.76   20.00
   3  -9  -1  477.35   20.20
   3   9   1  448.96   19.30
   3   9   1  472.65   20.50
  -3  -9   1  444.46   20.20
  -3   9  -1  477.25   19.80
  -3   9  -1  400.76   19.60
   4   9  -1   33.40    3.80
  -4   9   1   33.50    3.90
  -4  -9  -1   26.40    4.10
  -4  -9  -1   30.80    3.70
  -4  -9  -1   42.60    5.10
   4   9  -1   36.30    4.30
  -4  -9  -1   41.20    6.70
   4   9  -1   37.50    5.00
  -4   9   1   36.70    4.50
  -4  -9  -1   32.90    4.10
   4   9  -1   35.20    3.40
   4  -9   1   36.50    4.70
  -4  -9  -1   39.30    5.50
   4   9  -1   34.40    4.20
  -4   9  -1   34.20    4.50
  -4  -9   1   28.20    4.20
   4   9   1   42.00    4.30
  -4  -9   1   35.30    4.80
  -4   9  -1   38.60    4.60
  -4  -9   1   31.30    3.50
   4   9   1   36.00    4.30
   4  -9  -1   39.70    4.70
   4   9   1   29.50    3.00
   4   9   1   33.00    4.60
  -4  -9   1   37.10    5.10
  -4   9  -1   30.10    3.70
  -5   9   1  372.36   15.60
  -5  -9  -1  315.07   16.20
   5   9  -1  351.56   16.80
   5   9  -1  332.87   15.30
  -5  -9  -1  327.97   15.20
   5   9  -1  336.17   15.40
  -5  -9  -1  327.37   15.30
  -5  -9  -1  324.37   16.40
   5  -9   1  352.36   16.40
  -5   9   1  332.17   14.70
  -5  -9  -1  351.96   19.20
   5   9  -1  346.07   15.80
  -5  -9   1  328.17   14.90
  -5  -9   1  350.26   16.50
  -5   9  -1  334.47   15.00
  -5   9  -1  345.77   17.30
  -5  -9   1  340.87   18.60
   5   9   1  320.97   14.70
   5  -9  -1  359.16   16.50
  -5  -9   1  347.47   15.20
  -5  -9   1  336.67   16.30
   5   9   1  347.67   15.70
   5  -9  -1  334.67   16.10
  -5   9  -1  337.67   16.00
  -6  -9  -1   10.90    3.80
  -6  -9  -1    8.60    2.50
  -6  -9  -1    5.20    2.10
  -6  -9  -1    1.80    2.00
  -6   9   1    7.40    2.30
   6   9  -1    6.20    2.30
   6   9  -1    6.00    2.70
  -6  -9  -1    7.80    2.90
   6   9  -1    4.40    2.20
  -6  -9   1    5.10    1.80
  -6  -9   1    7.00    2.70
  -6   9  -1    3.30    2.40
   6  -9  -1    2.00    3.70
  -6  -9   1    9.00    3.50
   6  -9  -1    6.70    2.40
   6   9   1    8.60    2.10
   6   9   1    8.30    2.50
   6  -9  -1    6.20    2.60
   6   9   1    7.10    2.40
  -6  -9   1    7.00    2.20
  -6  -9   1    5.00    2.50
  -7  -9  -1  452.45   21.50
  -7  -9  -1  471.65   20.60
  -7  -9  -1  473.15   21.70
   7   9  -1  470.65   21.00
  -7   9   1  502.15   21.10
   7   9  -1  437.76   20.40
   7   9  -1  462.75   20.50
  -7  -9  -1  463.85   20.30
  -7  -9  -1  464.15   24.40
  -7  -9   1  461.65   20.20
  -7  -9   1  426.76   21.10
  -7  -9   1  463.05   20.10
   7   9   1  473.75   20.20
   7   9   1  454.65   19.90
  -7   9  -1  465.65   20.80
   7   9   1  490.45   21.10
   7  -9  -1  462.55   25.00
  -7  -9   1  473.45   21.80
  -7   9  -1  490.35   21.70
  -7  -9   1  492.15   24.10
   7  -9  -1  443.36   20.90
  -8  -9  -1   52.89    6.50
   8  -9   1   57.69    6.30
   8   9  -1   51.49    6.30
   8   9  -1   50.49    5.80
  -8   9   1   52.69    6.10
  -8   9   1   46.20    5.40
  -8  -9  -1   47.80    7.80
  -8  -9  -1   47.50    6.60
  -8  -9  -1   50.09    5.50
   8   9  -1   54.39    6.10
  -8  -9  -1   58.99    6.00
  -8  -9   1   40.20    5.80
  -8  -9   1   56.99    6.60
  -8   9  -1   48.00    5.90
  -8   9  -1   51.69    6.60
   8   9   1   49.70    5.50
  -8  -9   1   51.59    5.50
  -8  -9   1   52.49    4.80
   8  -9  -1   52.19    6.40
   8   9   1   45.60    5.70
   8   9   1   45.60    5.20
  -8  -9   1   53.79    6.80
  -8   9  -1   52.29    6.60
  -9  -9  -1   12.20    3.20
   9   9  -1   21.20    4.10
  -9   9   1   20.70    4.30
  -9  -9  -1   21.30    4.30
   9   9  -1   21.60    4.30
  -9   9   1   26.60    4.20
   9  -9   1   27.10    4.80
   9   9  -1   29.50    4.90
  -9   9   1   31.90    5.70
  -9  -9  -1   23.40    4.00
  -9  -9  -1   30.20    6.80
  -9  -9  -1   27.70    5.10
   9   9   1   19.60    3.80
   9  -9  -1   30.40    5.10
   9   9   1   21.50    3.90
  -9  -9   1   26.40    3.90
  -9  -9   1   26.00    4.00
  -9   9  -1   23.80    5.00
  -9  -9   1   30.10    6.00
  -9  -9   1   22.10    4.50
  -9   9  -1   18.50    3.90
  -9   9  -1   21.90    4.70
  -9  -9   1   24.80    4.70
 -10  -9  -1   30.40    5.60
  10  -9   1   41.20    6.20
 -10  -9  -1   22.30    6.20
 -10   9   1   22.70    5.00
 -10  -9  -1   22.30    4.20
  10   9  -1   40.00    5.90
 -10  -9  -1   42.80    5.60
 -10   9   1   22.70    4.10
  10   9  -1   34.30    5.20
 -10   9   1   34.90    5.50
 -10   9  -1   28.50    5.70
 -10   9  -1   30.70    4.80
 -10  -9   1   33.90    5.60
  10   9   1   34.20    5.10
 -10  -9   1   34.70    6.60
 -10  -9   1   29.00    5.00
 -10  -9   1   27.80    4.40
  10  -9  -1   49.30    6.80
 -10  -9   1   31.30    4.70
 -10   9  -1   31.60    5.60
 -11   9   1   47.90    7.10
 -11   9   1   56.69    7.90
 -11   9   1   45.90    5.70
 -11  -9  -1   57.59    6.40
 -11  -9  -1   51.09    6.20
  11   9  -1   60.39    7.40
 -11  -9  -1   46.00    8.60
 -11  -9  -1   49.40    6.90
  11  -9   1   52.69    7.00
  11   9   1   47.70    6.50
  11  -9  -1   47.30    7.00
 -11  -9   1   47.00    6.00
 -11  -9   1   38.80    6.50
 -11   9  -1   61.79    7.90
 -11   9  -1   44.70    5.80
 -11  -9   1   48.90    8.50
 -11   9  -1   45.30    6.90
 -12   9   1  261.77   15.60
 -12  -9  -1  230.28   13.30
 -12  -9  -1  249.58   13.70
 -12   9   1  245.58   15.20
 -12  -9  -1  220.08   17.00
  12   9  -1  227.48   13.80
 -12  -9  -1  244.48   15.20
  12  -9   1  214.88   14.00
 -12   9   1  226.98   12.90
 -12  -9   1  240.68   16.60
 -12   9  -1  210.98   12.80
  12  -9  -1  239.08   14.80
  12   9   1  215.08   13.30
 -12   9  -1  232.78   15.30
 -12   9  -1  219.58   14.50
 -12  -9   1  226.28   12.90
 -12  -9   1  241.38   15.00
 -13  -9  -1   71.79    8.10
 -13  -9  -1   57.99    8.60
 -13   9   1   66.99    8.70
 -13   9   1   61.69    8.90
 -13   9   1   60.09    7.10
  13  -9   1   63.69    8.80
  13   9  -1   66.79    8.40
 -13  -9  -1   87.59   12.90
 -13  -9   1   66.79   10.50
  13  -9  -1   78.39    9.60
  13   9   1   65.59    8.20
 -13  -9   1   78.79    9.40
 -13   9  -1   75.39   10.00
 -13  -9   1   63.79    7.30
 -13   9  -1   59.99    7.10
 -13   9  -1   58.79    8.40
 -14  -9  -1    7.80    3.40
 -14   9   1    9.30    3.60
 -14  -9  -1    1.10    3.70
 -14  -9  -1    7.00    5.00
 -14   9   1   12.10    4.20
 -14   9   1   -3.10    3.70
  14  -9   1    9.70    4.10
  14   9  -1   11.40    4.30
 -14   9  -1   12.40    4.50
  14   9   1    8.60    3.90
 -14   9  -1    3.20    4.00
 -14  -9   1    8.30    3.70
  14  -9  -1    1.60    3.50
 -14   9  -1    6.70    3.50
 -14  -9   1    5.70    3.70
 -14  -9   1   13.00    5.40
 -15   9   1    3.70    3.60
  15   9  -1    0.30    3.30
 -15  -9  -1    4.80    4.10
 -15   9   1   -1.40    2.70
  15  -9   1   -3.60    3.00
 -15  -9  -1    1.50    2.70
 -15   9   1   -2.40    3.20
 -15  -9  -1   -2.90    2.30
 -15   9  -1   -1.90    2.80
  15   9   1    2.40    3.30
 -15  -9   1    1.00    3.10
  15  -9  -1    3.80    4.00
 -15   9  -1   -3.30    2.80
 -15   9  -1   -8.50    3.50
 -16   9   1   76.79    8.70
 -16  -9  -1   80.59    9.10
 -16   9   1   63.79   10.60
 -16   9   1   80.39   10.70
  16   9  -1   74.09    9.70
 -16  -9  -1   83.39   11.30
  16  -9   1   58.89    9.20
 -16  -9  -1   87.69   13.70
 -16  -9   1   75.29    8.90
  16  -9  -1   64.89    9.70
 -16  -9   1   87.59   11.80
 -16   9  -1   56.89    9.20
 -16   9  -1   76.59    8.90
  16   9   1   71.29    9.50
 -16   9  -1   90.89   12.70
 -17  -9  -1   21.10    5.50
 -17   9   1   -0.10    3.00
 -17   9   1   -0.50    4.70
  17   9  -1    4.30    4.20
 -17  -9  -1    1.50    3.00
  17  -9   1    2.00    4.00
 -17   9   1    8.60    4.40
 -17  -9  -1   -7.10    2.60
  17   9   1    4.20    3.60
 -17   9  -1    2.10    3.20
  17  -9  -1    8.90    4.70
 -17   9  -1   -2.70    4.00
 -17  -9   1    0.30    3.50
 -17   9  -1    6.20    4.10
 -17  -9   1    9.60    5.10
  18   9  -1   48.10    8.20
 -18   9   1   37.90    9.50
 -18   9   1   54.69    9.30
 -18  -9  -1   34.60    6.80
  18  -9   1   35.30    7.70
 -18  -9  -1   68.99   11.90
 -18  -9  -1   38.40    8.80
 -18   9   1   37.00    6.60
  18  -9  -1   31.90    8.10
 -18   9  -1   34.30    6.30
 -18  -9   1   33.10    6.60
 -18  -9   1   48.60    9.20
  18   9   1   35.90    7.60
 -18   9  -1   37.80    9.30
 -18   9  -1   35.10    7.60
 -19   9   1    8.10    3.90
 -19   9   1   10.70    4.60
  19   9  -1    4.80    4.70
  19  -9   1    8.60    5.40
 -19  -9  -1   12.00    5.20
 -19   9   1   11.30    7.50
 -19  -9  -1   36.50    9.40
 -19  -9  -1    3.20    5.40
 -19   9  -1    9.30    4.90
 -19   9  -1   15.50    5.00
  19  -9  -1    2.90    5.40
  19   9   1   13.90    5.40
 -19  -9   1   16.60    5.30
 -19  -9   1   23.90    7.30
 -19   9  -1    9.40    6.10
 -20   9   1   -6.30    4.80
 -20  -9  -1   -7.70    3.60
 -20   9   1    9.90    5.70
 -20   9   1    5.60    4.00
  20  -9   1    1.30    4.90
  20   9  -1   15.20    6.30
 -20  -9  -1   -4.60    3.50
 -20  -9   1   -0.30    3.30
 -20   9  -1   -5.30    5.20
  20   9   1    0.70    4.00
 -20  -9   1   18.80    6.60
 -20   9  -1   -0.60    3.90
  20  -9  -1   -2.70    4.30
 -20   9  -1    5.30    4.40
 -21  -9  -1    9.80    7.00
  21   9  -1   33.10    8.00
 -21   9   1   15.50    7.70
 -21   9   1   12.70    6.40
 -21  -9  -1   18.80    6.40
 -21   9   1   22.50    5.80
  21  -9   1   14.70    6.50
  21  -9  -1   25.90    7.50
  21   9   1   26.10    7.40
 -21   9  -1   19.70    5.70
 -21   9  -1   24.90    9.60
  21  -9  -1   13.50    7.80
 -21  -9   1   40.50    9.30
 -21   9  -1   32.40    8.40
 -21  -9   1   27.40    6.40
  22   9  -1   33.00    8.20
 -22  -9  -1   11.90    5.70
  22  -9   1   28.10    8.10
 -22   9   1   50.59   10.50
 -22   9   1   24.20    9.60
 -22   9   1   29.40    6.60
  22  -9   1   29.50    8.40
 -22  -9  -1   23.40    6.40
  22  -9  -1   27.30    7.70
  22   9   1   19.10    7.20
 -22   9  -1   13.70    7.20
  22  -9  -1   24.20    7.80
 -22  -9   1   48.50    8.70
 -22   9  -1   48.50    9.90
 -22  -9   1   26.80    7.90
 -22   9  -1   35.20    7.00
 -23  -9  -1   24.90    6.90
 -23   9   1   22.20    8.80
  23  -9   1   11.10    6.40
 -23   9   1   32.90    7.20
 -23  -9  -1   26.10    7.50
  23  -9   1   28.20    8.30
 -23   9   1   22.70    7.40
  23   9  -1   31.90    8.40
 -23  -9   1   25.70    7.00
 -23  -9   1   12.10    7.70
 -23   9  -1   23.30    9.60
  23  -9  -1   13.70    8.20
 -23   9  -1   37.30    7.40
  23   9   1   27.80    8.00
 -23   9  -1   20.80    7.40
  23  -9  -1   14.00    7.20
 -24   9   1    6.10    7.20
  24  -9   1    2.70    6.50
  24  -9   1    1.60    5.50
 -24   9   1    1.20    4.70
 -24   9   1   -4.20    3.70
  24   9  -1    1.70    4.70
  24   9  -1    5.40    7.00
 -24  -9  -1    0.60    3.90
 -24   9  -1    2.30    4.00
  24  -9  -1    3.20    6.80
 -24  -9   1   -1.10    4.50
 -24   9  -1   -2.20    4.10
  24  -9  -1   -2.50    5.10
 -24   9  -1    0.70    7.00
 -24  -9   1   -7.80    3.90
  24   9   1    9.20    5.70
  25   9  -1   43.00    9.90
  25  -9   1   42.20    9.70
  25  -9  -1   20.70    8.40
  25   9   1   49.80   10.30
   0  10  -1   40.40    3.70
   0 -10  -1   42.10    4.50
   0  10   1   33.00    3.90
   0  10  -1   39.50    4.10
   0 -10   1   36.60    4.20
   0  10  -1   37.60    4.20
   0  10  -1   40.60    4.90
   0  10   1   39.40    3.70
   0 -10  -1   41.00    4.90
   0 -10   1   39.00    4.70
   0 -10   1   36.00    4.80
   0  10  -1   41.80    4.90
   0  10   1   38.00    4.70
   0 -10  -1   36.70    4.60
   1  10  -1  603.94   24.80
   1  10  -1  612.94   25.20
  -1  10   1  641.04   25.30
  -1  10   1  596.74   26.00
   1 -10   1  600.34   26.10
  -1  10   1  621.04   25.30
   1 -10   1  614.24   25.00
  -1 -10  -1  628.24   26.30
  -1 -10  -1  631.04   26.10
   1 -10   1  632.14   26.00
  -1 -10  -1  624.34   25.30
   1  10  -1  616.94   26.20
   1  10  -1  611.94   24.70
  -1  10  -1  619.54   26.00
   1 -10  -1  584.94   25.70
  -1  10  -1  584.84   25.20
   1 -10  -1  625.74   25.20
  -1  10  -1  656.53   25.10
  -1 -10   1  634.14   25.10
  -1 -10   1  579.84   25.90
  -1 -10   1  576.44   26.00
   1  10   1  629.24   25.10
   1  10   1  617.44   24.50
  -1  10  -1  616.64   25.70
   1 -10  -1  656.43   26.40
   1  10   1  651.13   26.40
   2  10  -1   96.59    6.50
  -2 -10  -1   97.49    6.20
  -2 -10  -1   93.89    6.90
   2  10  -1   93.89    6.20
  -2  10   1   97.49    6.20
  -2 -10  -1  101.59    7.00
   2 -10   1   99.59    6.90
   2 -10   1   89.09    6.50
   2  10  -1   87.99    5.80
   2  10  -1  102.29    7.10
   2 -10   1   96.29    6.20
  -2  10   1   92.39    6.80
   2  10  -1  105.69    6.20
  -2 -10  -1   98.59    6.30
   2  10   1   87.19    6.00
  -2  10  -1  102.09    7.00
  -2 -10   1   98.79    6.90
   2 -10  -1  100.89    6.40
  -2 -10   1   95.09    6.10
  -2  10  -1   89.59    6.50
  -2  10  -1  101.49    6.10
   2 -10  -1  102.69    7.00
  -2  10  -1  101.29    6.70
  -2 -10   1   87.29    6.70
   2  10   1  108.89    7.40
   2  10   1   94.09    5.70
   2  10   1   97.79    6.30
   2 -10  -1   90.79    6.50
  -3 -10  -1   41.50    4.60
  -3 -10  -1   48.80    6.30
   3  10  -1   39.50    4.70
  -3 -10  -1   41.10    5.30
  -3 -10  -1   44.70    4.10
  -3  10   1   45.20    4.00
  -3  10   1   42.40    4.30
   3  10  -1   42.70    4.90
   3  10  -1   46.70    4.10
   3  10  -1   42.40    3.80
  -3 -10  -1   42.90    5.20
   3 -10   1   38.40    5.10
   3  10  -1   44.60    5.50
  -3 -10   1   45.30    4.00
   3  10   1   38.60    5.80
   3  10   1   49.40    4.50
  -3  10  -1   42.50    3.90
  -3  10  -1   47.10    4.70
   3  10   1   42.40    4.70
  -3 -10   1   43.50    4.50
  -3 -10   1   47.40    5.60
   3  10   1   47.40    4.90
  -3  10  -1   44.40    4.90
   3  10   1   41.10    3.60
  -3 -10   1   39.40    5.10
   3 -10  -1   47.40    5.30
  -4  10   1   27.10    3.60
  -4 -10  -1   25.00    4.30
   4  10  -1   22.30    3.30
   4  10  -1   24.80    3.70
  -4  10   1   27.10    3.40
  -4 -10  -1   18.80    3.70
  -4 -10  -1   15.90    4.90
   4  10  -1   28.10    3.70
  -4 -10  -1   18.80    4.70
   4  10  -1   18.60    3.80
  -4 -10  -1   26.90    3.80
   4  10  -1   26.40    4.00
  -4 -10  -1   22.30    3.40
   4 -10   1   23.40    4.10
  -4 -10   1   27.10    3.40
  -4 -10   1   31.20    4.00
  -4 -10   1   17.60    3.60
   4  10   1   27.00    3.80
  -4 -10   1   29.50    4.40
  -4  10  -1   27.00    4.00
   4  10   1   18.30    3.30
   4  10   1   23.70    3.10
  -4  10  -1   22.60    3.20
   4 -10  -1   22.20    3.90
   4  10   1   26.70    3.80
   5 -10   1   19.10    3.80
   5  10  -1   20.40    3.70
  -5 -10  -1   13.20    3.40
   5 -10   1   25.50    4.00
  -5 -10  -1   25.50    4.20
  -5  10   1   20.80    3.10
  -5 -10  -1   16.20    3.10
  -5 -10  -1   29.60    6.10
  -5 -10  -1   19.20    3.30
  -5  10   1   22.20    3.40
   5  10  -1   20.30    3.20
   5  10  -1   14.70    3.30
   5 -10  -1   20.70    5.60
  -5 -10   1   26.40    4.30
  -5 -10   1   16.10    3.60
  -5  10  -1   20.00    3.30
   5 -10  -1   17.40    3.50
   5 -10  -1   21.40    4.30
  -5 -10   1   17.70    2.90
   5  10   1   19.90    3.40
   5 -10  -1   20.30    3.60
   5  10   1   15.60    2.70
  -5 -10   1   24.00    3.50
   5  10   1   22.10    3.60
   5  10   1   17.60    3.30
  -5 -10   1   19.50    5.00
  -5  10  -1   21.10    3.70
  -6 -10  -1   75.69    6.20
  -6 -10  -1   84.99    8.80
   6 -10   1   98.29    7.30
  -6  10   1   93.99    6.50
   6  10  -1   81.99    6.20
  -6 -10  -1   84.69    6.40
  -6 -10  -1   83.39    7.00
   6  10  -1   94.29    6.90
  -6 -10  -1   98.69    7.50
   6  10  -1   86.29    6.30
  -6  10  -1   98.59    6.30
  -6 -10   1   92.09    8.80
   6 -10  -1   80.09    6.30
  -6 -10   1  101.99    7.40
  -6  10  -1   80.69    6.70
   6  10   1   89.99    6.90
   6 -10  -1   89.69    6.90
  -6 -10   1   90.09    7.20
   6 -10  -1   80.29    6.70
   6 -10  -1   97.29   11.30
   6  10   1   89.59    6.00
   6  10   1   89.29    6.20
  -6 -10   1   93.79    6.20
  -6 -10   1   89.49    6.10
  -7 -10  -1    3.40    2.60
  -7  10   1    1.60    1.60
   7  10  -1   -1.30    1.90
   7 -10   1    1.50    1.90
   7  10  -1    0.10    1.90
  -7 -10  -1    1.40    1.90
  -7 -10  -1    1.00    1.70
  -7 -10  -1    1.30    2.00
   7  10  -1    1.80    1.90
  -7 -10  -1   -0.90    2.40
   7 -10  -1    2.80    3.80
   7 -10  -1    0.40    1.80
   7  10   1    2.40    1.90
  -7  10  -1    0.30    2.00
  -7 -10   1    0.00    1.80
   7  10   1   -1.50    1.80
   7 -10  -1    1.80    2.30
  -7 -10   1   -0.30    2.50
   7 -10  -1    1.10    2.00
  -7 -10   1    0.60    1.60
   7  10   1    4.60    1.80
  -7 -10   1    4.20    1.90
  -7 -10   1    1.20    2.10
  -8 -10  -1    1.30    1.80
   8 -10   1    2.70    2.30
  -8 -10  -1   -1.70    1.40
   8  10  -1   -1.50    1.80
  -8 -10  -1    3.80    2.00
   8  10  -1   -0.40    2.20
  -8 -10  -1    3.80    3.20
   8  10  -1    1.70    1.90
  -8  10   1   -3.30    1.60
  -8 -10  -1   -0.20    1.90
  -8  10  -1    0.30    1.90
  -8 -10   1    0.80    1.90
  -8 -10   1   -3.30    1.40
   8  10   1    0.10    2.00
   8  10   1   -0.70    1.90
  -8 -10   1    5.40    2.70
   8 -10  -1    0.10    1.80
  -8 -10   1   -1.70    1.50
  -8  10  -1   -0.70    2.30
   8  10   1    2.20    1.70
  -8 -10   1    0.60    2.00
   9  10  -1   27.00    4.80
  -9 -10  -1   24.30    4.20
  -9 -10  -1   28.10    5.40
  -9 -10  -1   19.60    5.60
  -9  10   1   34.80    5.40
  -9 -10  -1   27.30    5.10
   9  10  -1   21.50    4.40
  -9 -10  -1   24.60    4.20
   9  10  -1   31.90    4.90
   9 -10   1   29.90    5.10
  -9  10   1   25.90    4.50
  -9  10  -1   23.60    4.30
   9 -10  -1   33.80    5.30
  -9 -10   1   26.40    5.40
   9  10   1   32.50    4.50
   9  10   1   29.80    5.20
  -9  10  -1   27.90    5.10
  -9 -10   1   25.00    4.00
   9  10   1   23.60    4.30
  -9  10  -1   32.00    5.60
  -9 -10   1   28.90    4.30
  -9 -10   1   30.80    5.10
  -9 -10   1   16.20    5.40
 -10  10   1   88.29    7.90
 -10 -10  -1   90.29    7.30
  10  10  -1   93.79    8.00
  10  10  -1   92.29    7.60
 -10 -10  -1   93.59    7.30
 -10 -10  -1  102.49    8.90
 -10 -10  -1  104.99   10.60
 -10  10   1  112.39    9.40
  10 -10   1  107.39    8.30
 -10  10   1   82.59    7.30
  10  10  -1   95.59    7.80
 -10 -10  -1   97.39    8.30
 -10  10  -1   81.59    8.20
 -10  10  -1   84.39    7.20
 -10  10  -1   97.89    8.50
 -10 -10   1   97.79    9.80
  10  10   1   96.49    7.50
 -10 -10   1   88.29    8.00
  10 -10  -1   92.89    8.20
  10  10   1  103.59    8.30
 -10 -10   1   99.39    7.50
 -10 -10   1   95.39    7.20
 -10 -10   1   92.29    8.50
  11  10  -1    8.30    3.50
 -11  10   1    8.70    3.50
 -11  10   1    3.10    2.40
 -11 -10  -1    5.20    4.30
  11  10  -1    2.50    3.00
 -11  10   1    8.40    3.60
 -11 -10  -1   -0.20    2.00
 -11 -10  -1    7.40    2.90
  11 -10   1    4.80    3.50
 -11 -10  -1    1.80    2.80
 -11 -10   1    2.70    2.30
  11 -10  -1    3.60    3.10
 -11  10  -1    3.40    2.80
 -11  10  -1    5.80    3.70
  11  10   1    4.10    2.80
 -11  10  -1    5.10    3.40
 -11 -10   1    7.30    3.70
 -11 -10   1    4.70    2.50
 -11 -10   1    4.20    3.20
 -12 -10  -1  101.39   11.60
 -12  10   1  109.99    9.60
 -12  10   1  110.89   10.00
 -12  10   1  101.89    8.10
 -12 -10  -1  107.89    8.60
  12  10  -1  119.29    9.30
 -12 -10  -1  110.69   10.00
  12 -10   1  102.69    9.20
 -12 -10  -1  100.19    8.30
 -12  10  -1  107.19    9.70
 -12 -10   1  102.09   11.00
  12  10   1  111.69    8.60
 -12  10  -1  127.69   10.70
 -12 -10   1  118.59    8.80
 -12  10  -1  104.59    8.40
 -12 -10   1  111.39    9.80
 -12 -10   1  100.79    8.20
  12 -10  -1   98.49    9.20
 -13 -10  -1    4.70    3.20
 -13  10   1    1.40    2.90
  13 -10   1   -1.30    3.10
 -13 -10  -1    2.20    3.20
  13  10  -1    2.00    3.30
 -13 -10  -1    1.30    3.00
 -13  10   1   -0.50    2.20
 -13  10   1    7.20    4.20
 -13 -10  -1   -5.90    1.90
  13 -10  -1   -0.50    2.60
 -13 -10   1   -0.80    3.00
 -13  10  -1   -2.50    3.00
 -13 -10   1    2.50    2.90
 -13 -10   1    6.40    3.60
 -13 -10   1    3.80    2.90
  13  10   1    0.50    2.90
 -13  10  -1    4.80    3.10
 -13  10  -1    1.40    2.90
 -14 -10  -1   22.70    4.70
 -14 -10  -1   11.00    4.00
 -14 -10  -1   16.80    7.00
 -14  10   1    8.40    5.10
 -14 -10  -1   22.20    5.70
 -14  10   1   12.20    4.80
  14 -10   1   24.10    6.00
 -14  10   1   20.00    4.50
  14  10  -1   15.20    5.40
 -14 -10   1   12.10    5.20
 -14 -10   1   14.30    4.40
  14  10   1   18.90    5.20
  14 -10  -1   16.90    5.40
 -14  10  -1   11.10    4.90
 -14 -10   1   21.00    6.70
 -14  10  -1   13.70    4.90
 -14  10  -1    8.80    3.70
 -15  10   1   59.29    7.50
  15 -10   1   60.59    8.80
 -15 -10  -1   49.30    7.40
 -15 -10  -1   52.69   10.90
 -15 -10  -1   53.69    7.30
 -15  10   1   47.00    8.10
  15  10  -1   67.89    9.10
 -15  10   1   41.10    8.30
 -15 -10  -1   59.49    9.00
 -15  10  -1   60.09    7.90
  15  10   1   48.40    7.50
 -15  10  -1   53.39    9.10
 -15 -10   1   45.90    8.70
 -15  10  -1   61.69    9.40
  15 -10  -1   52.39    8.80
 -15 -10   1   69.59   11.70
 -15 -10   1   48.20    6.90
 -16  10   1    6.10    4.60
 -16 -10  -1   10.80    4.40
  16 -10   1    4.90    4.50
 -16  10   1   15.30    5.50
 -16 -10  -1    6.50    5.40
  16  10  -1    9.40    4.70
 -16  10   1    1.70    3.00
  16  10   1    4.70    3.80
 -16  10  -1    9.40    4.70
 -16  10  -1   -3.00    4.10
  16 -10  -1    9.80    4.90
 -16 -10   1    5.00    4.10
 -16  10  -1   10.00    4.00
 -16 -10   1    5.00    3.70
 -17  10   1   54.89    9.90
  17 -10   1   36.70    8.00
 -17 -10  -1   62.49   12.10
 -17 -10  -1   38.10    7.20
 -17  10   1   46.40    7.10
 -17 -10  -1   31.20    7.60
  17  10  -1   37.20    7.60
 -17  10   1   35.40    7.90
  17 -10  -1   36.60    8.40
  17  10   1   38.70    7.30
 -17 -10   1   38.40    8.10
 -17  10  -1   45.80    7.20
 -17  10  -1   55.69    9.60
 -17  10  -1   45.30    9.60
 -17 -10   1   38.80    6.80
 -18  10   1    4.80    3.40
  18  10  -1    9.70    5.00
 -18 -10  -1   -4.10    3.30
 -18 -10  -1   -1.70    3.10
 -18  10   1   -5.60    4.40
 -18  10   1    5.70    4.60
  18 -10   1    3.10    4.50
 -18 -10   1    4.10    4.10
 -18 -10   1   10.40    5.00
 -18  10  -1    3.70    5.70
 -18  10  -1    2.10    3.50
  18  10   1   -2.10    3.50
  18 -10  -1   -2.10    3.90
 -18  10  -1    7.00    5.00
 -19  10   1    9.60    5.40
  19  10  -1    6.60    4.40
 -19 -10  -1   -4.40    2.80
  19 -10   1    1.70    4.20
 -19  10   1   -3.00    2.50
 -19 -10  -1   -1.50    3.20
  19 -10  -1   -3.80    4.40
 -19 -10   1    8.70    5.70
 -19 -10   1   -4.90    2.90
 -19  10  -1   -0.40    3.30
 -19  10  -1   -5.40    3.50
  19  10   1   -4.90    3.20
 -19  10  -1   -2.50    2.60
 -20 -10  -1    2.20    4.80
 -20  10   1    3.30    5.90
  20  10  -1    5.50    5.10
 -20 -10  -1    1.00    4.30
 -20  10   1    3.90    4.00
 -20  10   1    7.70    5.60
  20 -10   1    9.90    6.00
 -20 -10   1   -0.20    3.10
  20 -10  -1   10.30    6.10
 -20 -10   1    6.20    5.10
  20  10   1    4.20    5.00
 -20  10  -1    9.40    5.90
 -20  10  -1    4.20    6.80
 -20  10  -1    3.80    4.00
  21  10  -1    6.60    5.40
 -21 -10  -1    3.90    4.80
  21 -10   1    2.10    5.40
 -21  10   1    2.60    3.50
 -21  10   1    6.40    6.30
 -21 -10  -1    6.30    4.60
 -21  10   1   14.70    6.80
 -21  10  -1   -4.10    4.60
  21 -10  -1    5.60    6.20
 -21  10  -1    8.10    4.20
 -21 -10   1   13.80    6.50
  21  10   1   11.10    5.90
 -21  10  -1   18.60    7.80
 -21 -10   1    9.50    4.80
 -22  10   1   31.90    6.90
 -22  10   1    6.00    7.50
 -22 -10  -1   29.00    7.30
 -22 -10  -1   22.60    7.60
  22  10  -1   24.30    7.90
  22 -10   1   16.30    7.00
 -22  10   1    1.60    6.20
 -22  10  -1   15.80    7.00
  22 -10  -1   20.20    8.30
 -22 -10   1   18.70    6.80
 -22 -10   1   20.40    6.00
  22 -10  -1   11.60    6.90
 -22  10  -1   25.60    6.50
  22  10   1   21.40    7.60
 -22  10  -1    7.10    6.80
  23  10  -1   27.80    7.80
  23 -10   1    6.10    6.00
  23 -10   1   27.80    8.60
 -23 -10  -1   13.30    7.20
 -23  10   1   18.40    7.20
 -23  10   1   18.20    7.90
 -23  10   1   26.00    6.90
 -23 -10  -1   20.10    6.60
 -23  10  -1   12.80    8.20
  23 -10  -1   12.10    6.90
 -23 -10   1   16.10    6.80
 -23 -10   1   15.30    6.30
  23 -10  -1   19.80    7.90
 -23  10  -1   29.20    7.00
  23  10   1   14.60    6.20
 -23  10  -1   30.20    8.20
 -24 -10  -1  -13.30    3.60
 -24  10   1   -0.80    6.10
 -24  10   1    1.80    4.70
  24 -10   1   -4.10    5.10
  24 -10   1   -6.00    4.90
  24  10  -1   -0.10    5.50
 -24 -10  -1    2.30    4.30
 -24  10   1   -6.90    3.50
  24 -10  -1   -3.00    5.40
  24 -10  -1   18.40    7.00
 -24 -10   1    4.60    4.50
 -24  10  -1    3.80    5.50
 -24  10  -1   -6.40    6.20
  24  10   1    5.50    5.10
 -24 -10   1    9.90    6.30
 -24  10  -1    2.10    4.10
   0 -11   1   -2.40    1.20
   0  11   1    2.50    1.80
   0 -11  -1   -0.70    1.60
   0  11  -1   -1.00    1.30
   0  11   1   -0.80    1.50
   0  11  -1   -1.00    1.20
   0 -11   1   -1.00    1.50
   0 -11  -1    0.20    1.40
   0  11  -1    1.60    1.60
   0 -11  -1   -0.60    1.40
   0  11   1   -0.90    1.20
   0 -11   1   -1.50    1.70
  -1 -11  -1  330.17   16.40
  -1 -11  -1  349.57   16.80
  -1  11   1  363.96   15.40
  -1 -11  -1  354.46   15.80
   1  11  -1  337.67   15.50
  -1 -11  -1  366.56   18.80
   1  11  -1  350.66   15.50
   1 -11   1  342.17   16.70
  -1  11   1  347.47   15.80
   1 -11   1  340.97   15.50
  -1  11   1  333.57   15.60
   1  11  -1  343.07   15.20
   1 -11   1  344.17   16.40
  -1  11   1  334.37   15.70
   1  11   1  327.87   15.30
  -1  11  -1  349.47   15.50
  -1 -11   1  367.16   16.90
   1 -11  -1  355.76   16.80
   1 -11  -1  342.87   16.40
  -1  11  -1  351.46   16.30
  -1 -11   1  343.87   15.50
   1  11   1  344.97   15.60
   1 -11  -1  343.57   15.70
  -1 -11   1  314.47   16.50
   1  11   1  353.96   15.10
  -1  11  -1  335.47   15.70
   2 -11   1  423.26   17.80
  -2  11   1  430.26   17.70
   2  11  -1  406.06   17.40
  -2  11   1  381.06   17.00
  -2 -11  -1  409.66   18.90
   2 -11   1  377.16   18.20
  -2 -11  -1  376.56   18.50
  -2 -11  -1  402.56   17.80
   2 -11   1  391.66   18.60
  -2 -11  -1  401.06   18.90
   2  11  -1  395.06   17.20
   2  11  -1  398.06   17.60
  -2  11  -1  404.96   18.20
  -2 -11   1  396.16   18.60
   2 -11  -1  402.06   17.70
   2 -11  -1  395.96   18.40
   2 -11  -1  403.76   18.70
   2 -11  -1  385.26   18.20
  -2  11  -1  413.26   18.20
  -2 -11   1  383.96   18.70
   2  11   1  392.46   17.40
  -2  11  -1  391.56   17.30
   2  11   1  413.36   17.60
  -2 -11   1  399.16   17.50
   2  11   1  388.66   16.90
   3  11  -1   10.10    2.50
   3 -11   1    7.70    2.80
   3  11  -1   13.30    3.00
  -3 -11  -1    9.80    2.60
  -3 -11  -1   11.10    3.70
  -3  11   1    9.00    2.40
  -3 -11  -1   11.40    3.20
   3  11  -1    6.10    2.10
  -3  11   1   12.50    2.70
  -3 -11  -1   15.70    3.00
   3  11  -1   11.80    2.90
  -3 -11  -1    9.60    2.80
  -3 -11   1   13.50    2.70
   3  11   1   13.50    2.80
   3  11   1   11.50    2.80
   3 -11  -1    8.30    2.50
   3  11   1   12.00    2.40
   3  11   1   15.00    3.00
   3 -11  -1   11.90    3.10
  -3 -11   1    6.40    2.10
  -3  11  -1   10.90    3.10
  -3  11  -1   12.20    2.80
  -3 -11   1   12.90    3.30
  -3 -11   1   11.80    3.60
  -3 -11   1    7.20    2.70
  -3  11  -1    7.50    2.60
  -4 -11  -1    6.10    2.50
   4  11  -1    8.90    2.80
   4  11  -1    9.50    2.70
  -4 -11  -1    7.10    2.20
  -4  11   1    3.90    2.00
   4  11  -1    6.20    2.30
  -4 -11  -1    8.30    3.90
   4  11  -1    8.60    2.40
   4 -11   1    6.50    2.70
  -4 -11  -1    2.60    2.20
  -4  11   1    9.80    2.40
  -4 -11  -1    7.70    2.60
  -4 -11   1    8.00    2.60
   4  11   1    4.90    2.00
  -4 -11   1    8.30    2.20
  -4  11  -1    3.10    1.80
  -4 -11   1    8.00    2.40
  -4 -11   1   11.20    3.30
  -4  11  -1    8.50    2.50
   4  11   1    7.40    2.40
  -4 -11   1   10.60    3.70
   4 -11  -1    8.90    2.50
   4  11   1    6.50    1.90
   4 -11  -1   10.60    4.10
   4 -11  -1    7.50    2.60
   4 -11  -1   12.00    3.30
   4  11   1    5.80    2.20
  -5 -11  -1   35.20    6.50
  -5 -11  -1   36.70    7.10
   5  11  -1   43.50    4.30
  -5 -11  -1   47.00    5.80
  -5  11   1   44.90    4.30
   5 -11   1   41.30    5.00
   5  11  -1   40.10    5.10
   5  11  -1   45.80    5.20
  -5 -11  -1   40.30    5.60
   5  11  -1   43.20    4.70
   5 -11   1   42.20    5.60
  -5  11   1   45.20    4.80
  -5 -11  -1   43.10    5.20
  -5 -11  -1   43.80    5.00
   5  11   1   54.99    5.80
  -5 -11   1   37.70    5.50
  -5 -11   1   37.50    4.30
  -5  11  -1   47.10    5.10
  -5 -11   1   36.90    5.40
   5  11   1   44.50    5.10
   5 -11  -1   52.29    6.10
   5 -11  -1   33.60    4.50
  -5 -11   1   47.40    5.10
  -5  11  -1   46.30    5.50
   5  11   1   40.20    3.90
   5 -11  -1   32.50    6.70
   5  11   1   35.80    4.70
   5 -11  -1   36.90    4.90
  -6 -11  -1  554.74   28.20
   6 -11   1  582.84   24.30
   6 -11   1  562.54   24.60
   6 -11   1  471.45   25.80
  -6 -11  -1  562.24   23.50
  -6  11   1  536.75   22.50
   6  11  -1  551.94   23.30
   6 -11   1  535.45   23.10
  -6 -11  -1  518.95   24.70
  -6 -11  -1  524.05   23.00
   6  11  -1  526.65   23.10
  -6 -11  -1  521.95   24.60
  -6  11   1  562.94   23.30
   6  11  -1  516.05   23.60
   6 -11  -1  537.65   23.20
  -6  11  -1  543.75   22.80
  -6 -11   1  507.25   22.90
   6 -11  -1  531.25   24.20
  -6 -11   1  536.05   27.40
  -6 -11   1  546.85   24.70
   6  11   1  532.85   22.60
   6  11   1  572.94   23.90
  -6  11  -1  564.74   24.10
  -6 -11   1  537.35   24.50
   6 -11  -1  551.14   24.10
  -6 -11   1  548.55   22.90
   6  11   1  551.84   23.00
   6 -11  -1  478.85   26.70
  -7 -11  -1   82.19    7.40
   7  11  -1   90.49    6.60
   7  11  -1   85.59    7.10
   7 -11   1   87.19    7.40
  -7 -11  -1   86.69    7.50
  -7  11   1   80.99    6.50
  -7 -11  -1   84.49    6.50
   7 -11   1   84.49    6.50
  -7 -11  -1   95.09    9.90
   7 -11   1   89.49    7.30
   7  11  -1   86.69    6.80
  -7 -11  -1   84.59    6.50
   7 -11  -1   82.09    6.60
   7  11   1   85.49    6.40
  -7 -11   1   81.79    7.30
   7 -11  -1   84.29    7.10
  -7 -11   1   81.69    6.40
  -7 -11   1   89.59    6.30
  -7 -11   1   90.59    9.30
   7  11   1   87.79    6.20
  -7  11  -1   82.69    7.20
   7 -11  -1   87.99   11.60
   7 -11  -1   89.69    7.30
   7  11   1   91.49    7.30
  -7 -11   1   86.89    7.50
  -8 -11  -1   24.60    4.90
   8  11  -1   30.20    4.40
  -8 -11  -1   24.30    4.20
   8  11  -1   27.10    4.60
  -8 -11  -1   33.60    7.50
   8  11  -1   22.70    4.40
  -8 -11  -1   28.40    5.20
  -8  11   1   29.80    4.60
   8 -11   1   30.60    4.70
  -8 -11  -1   28.60    4.50
   8  11   1   29.20    4.90
  -8 -11   1   18.10    3.70
   8 -11  -1   19.20    4.10
  -8  11  -1   28.20    4.70
   8 -11  -1   33.80    7.50
   8  11   1   21.30    3.90
   8  11   1   21.20    3.70
  -8 -11   1   29.30    6.40
  -8 -11   1   28.00    4.30
   8 -11  -1   21.90    4.30
  -8 -11   1   20.90    4.50
  -8 -11   1   27.30    5.10
  -8  11  -1   23.90    4.60
   8 -11  -1   21.00    4.40
   9  11  -1    0.00    1.90
  -9 -11  -1   -3.30    1.70
  -9 -11  -1   -0.10    2.80
   9  11  -1    3.40    2.30
  -9 -11  -1    4.40    2.60
  -9  11   1    4.20    2.70
  -9 -11  -1   -0.20    1.70
   9 -11   1    1.20    2.40
  -9 -11  -1    0.50    1.90
  -9  11   1   -0.10    1.90
   9  11  -1    6.10    2.80
  -9  11  -1    6.50    2.90
  -9 -11   1    1.20    3.10
  -9  11  -1   -2.20    2.00
  -9 -11   1   -1.10    1.80
  -9 -11   1    1.30    1.90
   9  11   1    3.30    2.30
   9 -11  -1    0.60    2.30
  -9 -11   1    1.20    2.50
  -9 -11   1    1.00    2.10
   9 -11  -1   -2.30    2.00
   9  11   1   -0.60    1.90
  -9  11  -1    8.90    3.60
   9  11   1   -0.80    2.10
 -10 -11  -1    2.90    2.90
  10  11  -1    2.00    2.60
 -10 -11  -1    7.80    4.40
  10 -11   1    5.70    3.10
 -10  11   1    9.70    3.30
  10  11  -1    8.20    3.40
 -10  11   1    5.30    3.20
 -10 -11  -1    0.50    2.90
 -10  11   1   11.40    4.10
 -10 -11  -1    7.50    2.90
 -10 -11  -1    5.00    3.00
  10  11  -1    3.60    3.00
  10  11   1   10.30    3.30
 -10  11  -1    9.50    3.90
 -10 -11   1    8.90    3.40
 -10 -11   1    8.60    2.90
 -10  11  -1    3.90    2.60
  10  11   1   13.70    3.40
  10 -11  -1    8.10    3.50
  10  11   1    6.50    3.20
 -10 -11   1   16.80    5.20
 -10 -11   1    0.80    2.40
 -10  11  -1   11.80    4.00
 -10 -11   1    7.70    2.90
 -11 -11  -1   -0.50    3.00
 -11  11   1   -1.20    2.60
 -11  11   1   -1.10    2.10
  11  11  -1    0.30    2.40
  11  11  -1    1.50    2.60
 -11 -11  -1   -2.00    2.20
  11  11  -1   -2.90    1.90
 -11 -11  -1    1.20    2.80
  11 -11   1    0.70    2.60
 -11 -11  -1   -0.90    2.50
 -11  11   1   -4.50    2.30
 -11  11  -1    0.10    2.70
  11  11   1   -3.00    1.80
 -11  11  -1   -2.40    2.20
 -11 -11   1    2.70    3.00
 -11 -11   1   -0.50    2.20
  11  11   1   -0.90    2.40
 -11  11  -1   -1.60    2.10
  11 -11  -1    2.50    2.90
 -11 -11   1    3.60    3.30
 -11 -11   1    1.60    2.20
 -11 -11   1    1.50    2.50
  12 -11   1  100.59    8.90
 -12  11   1  119.29    9.90
 -12 -11  -1  113.09    8.70
  12  11  -1  104.19    8.70
 -12  11   1  105.69    8.30
 -12 -11  -1  100.79    9.60
 -12 -11  -1   98.99    8.20
 -12 -11  -1  100.19   11.80
 -12  11   1  111.89   10.00
  12  11  -1  110.69    9.30
  12  11   1  111.59    9.60
 -12 -11   1   99.19    8.20
 -12  11  -1   93.29    9.40
 -12  11  -1   89.59    8.00
  12  11   1   94.09    8.10
 -12 -11   1   89.59   10.80
  12 -11  -1   94.39    9.10
 -12 -11   1  101.09    9.60
 -12 -11   1  107.59    8.20
 -12  11  -1  113.29   10.20
 -13  11   1    6.50    3.50
 -13 -11  -1    7.50    3.60
 -13 -11  -1    8.90    3.40
 -13  11   1   -3.30    3.00
  13  11  -1    6.00    3.80
  13 -11   1   10.00    4.10
 -13 -11  -1   19.00    6.80
  13  11  -1    2.70    3.90
 -13  11   1    3.00    2.80
 -13 -11  -1    6.90    4.20
 -13 -11   1   20.30    5.80
 -13 -11   1   -4.10    2.30
  13 -11  -1    3.50    3.90
 -13 -11   1   13.10    4.60
 -13  11  -1    3.50    3.20
  13  11   1    4.40    3.50
 -13  11  -1    5.10    4.20
 -13  11  -1    1.80    2.80
 -13 -11   1    2.00    2.60
 -14  11   1   36.00    6.10
 -14 -11  -1   26.60    6.90
 -14  11   1   30.10    6.80
  14  11  -1   33.70    6.70
  14 -11   1   25.60    6.10
 -14 -11  -1   35.20    6.20
  14  11  -1   40.70    7.10
 -14  11   1   40.40    7.60
 -14 -11  -1   51.69   10.50
 -14 -11  -1   40.20    6.50
 -14 -11   1   51.69    9.70
 -14  11  -1   33.00    7.10
  14  11   1   29.70    6.10
 -14  11  -1   43.40    6.50
 -14 -11   1   44.30    6.70
 -14  11  -1   35.50    7.50
 -14 -11   1   27.90    6.90
 -14 -11   1   41.40    6.10
  14 -11  -1   45.70    7.90
 -15 -11  -1   15.00    4.70
 -15  11   1   15.80    5.40
  15 -11   1   12.60    5.50
  15  11  -1   13.80    4.70
 -15 -11  -1   22.90    4.80
 -15 -11  -1   23.30    8.10
 -15  11   1   10.40    4.50
 -15  11   1   12.70    4.20
 -15 -11  -1    9.50    4.20
 -15 -11   1    8.40    3.70
 -15  11  -1   14.90    4.40
 -15  11  -1    8.50    5.10
  15  11   1   20.30    5.40
  15 -11  -1    9.10    5.10
 -15 -11   1   15.80    4.70
 -15  11  -1   22.80    6.00
 -15 -11   1   28.90    7.80
 -15 -11   1   18.50    5.60
 -16  11   1   15.90    5.70
 -16 -11  -1   40.60    9.60
 -16  11   1   14.50    4.40
 -16  11   1   19.60    5.70
  16  11  -1   13.40    5.60
 -16 -11  -1   23.10    6.40
 -16 -11  -1   15.30    4.80
  16 -11   1    5.50    4.80
 -16 -11  -1   30.90    5.90
 -16 -11   1   16.00    5.00
 -16 -11   1   16.60    5.00
 -16 -11   1   41.70    8.70
 -16  11  -1   25.80    7.20
  16 -11  -1   29.20    7.40
 -16 -11   1   18.80    6.20
 -16  11  -1   28.20    5.70
  16  11   1   11.80    4.50
 -16  11  -1   27.30    7.10
 -17  11   1    0.70    4.80
 -17  11   1   -4.70    3.30
  17  11  -1    1.50    4.10
 -17 -11  -1    8.50    3.80
  17 -11   1    2.40    4.40
 -17  11   1    2.10    3.70
 -17 -11  -1   -1.10    3.50
 -17 -11  -1   -0.30    3.00
 -17 -11   1    0.90    3.50
 -17  11  -1    2.50    4.60
 -17 -11   1    6.10    3.50
 -17  11  -1    6.00    3.80
 -17  11  -1    2.30    3.80
  17 -11  -1   -1.30    4.20
 -17 -11   1    1.50    3.90
  17  11   1    7.70    4.20
 -18 -11  -1    4.60    5.30
  18 -11   1   16.20    6.20
  18  11  -1    8.40    4.60
 -18 -11  -1   46.50   10.20
 -18  11   1    7.60    5.00
 -18 -11  -1    8.20    4.80
 -18  11   1   16.00    7.00
 -18  11   1   11.10    4.30
 -18 -11  -1   13.30    5.00
 -18 -11   1   11.10    4.30
 -18 -11   1   12.20    3.90
 -18 -11   1   11.40    6.20
 -18  11  -1   14.80    6.70
  18  11   1    0.90    3.60
 -18  11  -1   14.70    5.70
 -18  11  -1    9.70    4.20
  18 -11  -1    5.20    5.10
 -19 -11  -1    4.00    5.00
 -19  11   1    7.10    3.90
  19 -11   1    9.40    5.30
 -19  11   1    3.70    4.70
  19  11  -1   -2.60    3.80
 -19 -11  -1   -2.70    3.80
 -19  11   1   -1.30    4.90
  19 -11  -1   -2.80    4.20
 -19 -11   1   -5.70    3.10
 -19  11  -1    0.70    3.90
 -19  11  -1    4.30    5.00
  19  11   1    1.20    4.50
 -19  11  -1    7.80    5.70
 -19 -11   1   -2.70    4.40
 -20  11   1   27.00    8.00
 -20 -11  -1   14.50    6.90
 -20 -11  -1   59.89   12.10
 -20 -11  -1    9.30    5.10
  20  11  -1   12.30    5.90
  20 -11   1   10.90    6.50
 -20  11   1   29.50    8.50
 -20  11   1   12.70    5.00
 -20 -11   1   11.20    6.50
 -20  11  -1    6.60    6.30
 -20  11  -1   18.20    7.00
 -20 -11   1   14.60    4.90
 -20  11  -1    8.00    4.50
  20 -11  -1   15.50    6.80
  20  11   1    5.20    5.10
 -21 -11  -1   15.30    6.40
 -21  11   1   17.10    6.70
  21  11  -1   -1.10    5.00
  21 -11   1    8.20    5.70
 -21  11   1   16.80    5.30
 -21  11   1    6.30    6.40
 -21 -11  -1    8.00    4.60
  21 -11  -1    0.80    5.30
  21  11   1    8.90    5.80
 -21  11  -1   10.80    4.90
 -21  11  -1   14.50    7.50
 -21 -11   1    7.20    6.30
 -21  11  -1    3.90    5.80
 -21 -11   1   12.10    5.20
 -22  11   1   10.80    5.20
 -22 -11  -1   -1.80    5.30
 -22 -11  -1    5.70    4.40
 -22  11   1   -0.10    4.70
  22  11  -1    0.60    4.60
 -22  11   1    4.00    6.10
  22 -11   1    5.80    5.80
 -22  11  -1   -2.40    3.70
  22 -11  -1   -1.60    5.20
 -22 -11   1    6.50    5.90
  22 -11  -1    6.20    5.60
 -22 -11   1    1.40    4.00
  22  11   1    6.30    5.50
 -22  11  -1   -5.20    5.80
 -22  11  -1    8.00    5.00
 -23  11   1   28.00    6.90
  23 -11   1   20.10    7.20
  23 -11   1   20.50    7.90
 -23  11   1   19.70    8.20
 -23 -11  -1   27.10    8.50
 -23  11   1   12.40    8.80
 -23 -11  -1   24.70    7.20
  23  11  -1   18.00    6.80
 -23  11  -1   45.20   11.30
 -23  11  -1   22.40    8.20
 -23  11  -1   33.30    7.30
 -23 -11   1   16.90    6.20
 -23 -11   1   41.40   10.00
  23 -11  -1   29.70    9.00
  23  11   1   35.80    8.40
  23 -11  -1   24.50    8.10
 -24  11   1   13.90    6.00
 -24 -11  -1   17.20    7.70
 -24  11   1   35.00    9.40
  24  11  -1    9.00    7.10
 -24 -11  -1   28.00    8.30
  24 -11   1   17.80    7.70
  24 -11   1   34.40    9.30
 -24  11   1    4.00    7.00
 -24  11  -1   25.50    9.70
  24 -11  -1   11.80    7.10
 -24  11  -1    2.20    4.30
 -24  11  -1   13.80    7.20
 -24 -11   1   20.40    8.80
  24 -11  -1   10.30    7.10
  24  11   1    5.50    6.30
 -24 -11   1   11.40    5.90
   0  12  -1  342.97   16.10
   0 -12   1  363.76   17.70
   0 -12  -1  345.27   17.60
   0 -12  -1  375.66   16.70
   0  12   1  345.97   16.00
   0  12  -1  371.86   16.30
   0  12  -1  364.06   17.40
   0 -12   1  343.87   17.30
   0 -12   1  361.36   16.30
   0 -12  -1  413.86   18.10
   0  12  -1  353.06   16.20
   0 -12  -1  356.36   17.40
   0  12   1  358.96   16.00
   0  12   1  360.26   16.50
   1 -12   1  448.66   20.80
   1 -12   1  450.55   19.80
   1  12  -1  473.05   20.00
  -1  12   1  434.86   19.40
  -1 -12  -1  416.66   20.60
  -1 -12  -1  447.46   20.00
   1  12  -1  456.85   19.70
  -1  12   1  461.95   20.20
  -1 -12  -1  464.65   21.50
   1 -12   1  454.35   21.20
  -1  12   1  445.66   19.90
   1  12  -1  459.35   19.60
  -1 -12  -1  491.05   21.30
  -1  12  -1  469.35   19.90
  -1 -12   1  443.66   20.90
  -1 -12   1  462.75   19.90
   1  12   1  469.75   19.70
  -1  12  -1  436.76   19.90
  -1  12  -1  441.16   19.60
   1 -12  -1  475.55   22.20
   1  12   1  451.35   19.20
   1 -12  -1  464.45   20.10
   1 -12  -1  445.76   21.10
  -1  12  -1  479.95   20.80
   1  12   1  466.05   19.90
  -1 -12   1  473.05   21.50
   2 -12   1    6.80    2.40
  -2 -12  -1    2.80    2.80
  -2  12   1    2.30    2.40
  -2  12   1    1.20    1.70
  -2 -12  -1    2.30    2.40
   2  12  -1    2.30    1.70
  -2 -12  -1    5.80    2.40
  -2  12   1   -1.10    1.50
   2 -12   1    6.90    2.70
   2  12  -1    4.50    2.10
  -2 -12  -1    2.90    2.20
   2 -12   1    4.20    2.50
   2  12  -1    3.40    1.90
  -2  12  -1    3.50    2.20
   2 -12  -1    5.00    2.20
   2  12   1    2.60    2.10
  -2 -12   1    3.20    2.40
   2 -12  -1    5.80    4.20
  -2 -12   1    1.60    1.70
  -2  12  -1    4.80    2.20
  -2  12  -1    0.50    1.90
   2 -12  -1    6.80    2.20
   2 -12  -1    2.30    1.90
   2 -12  -1    5.20    2.60
  -2 -12   1    0.80    1.90
   2  12   1    2.70    2.00
   2  12   1    2.40    1.70
  -2 -12   1    4.90    3.50
  -3 -12  -1   41.60    4.90
   3  12  -1   49.20    5.60
   3  12  -1   34.00    4.40
  -3 -12  -1   37.40    5.20
   3  12  -1   43.70    4.60
  -3 -12  -1   41.60    5.70
  -3  12   1   46.50    5.10
  -3 -12  -1   48.10    6.50
   3 -12   1   39.70    5.50
  -3  12   1   51.79    5.10
   3  12  -1   44.80    5.10
  -3 -12  -1   41.10    4.80
   3 -12  -1   41.80    6.60
   3 -12  -1   40.00    5.50
   3 -12  -1   46.50    4.90
  -3 -12   1   39.50    5.60
   3  12   1   43.30    5.20
   3 -12  -1   42.50    5.00
  -3  12  -1   45.40    4.80
  -3 -12   1   39.70    4.80
  -3 -12   1   43.40    5.60
  -3 -12   1   41.90    5.90
   3  12   1   48.40    5.20
  -3  12  -1   45.30    5.40
   3  12   1   39.90    3.80
  -3  12  -1   42.50    5.50
  -4 -12  -1   86.59    6.50
   4 -12   1   81.79    6.00
  -4  12   1   87.89    5.90
  -4 -12  -1   92.49    9.50
  -4  12   1   89.99    6.20
  -4 -12  -1   84.19    7.10
   4  12  -1   87.69    6.30
   4  12  -1   87.29    6.60
   4 -12   1   80.79    6.30
  -4 -12  -1   83.59    7.10
   4 -12   1   86.39    7.10
   4  12  -1   96.89    6.50
   4  12  -1   71.79    6.40
  -4 -12  -1   87.49    6.40
   4  12   1   81.89    6.40
   4 -12  -1   80.99    6.00
  -4 -12   1   72.59    6.80
  -4 -12   1   89.99    9.00
  -4  12  -1   92.99    6.20
  -4 -12   1   78.09    6.00
   4 -12  -1   98.59   10.60
   4  12   1   85.79    6.30
  -4  12  -1   91.39    6.70
  -4 -12   1   86.09    6.00
   4 -12  -1   84.59    6.50
   4  12   1   86.59    5.90
  -4 -12   1   77.79    6.90
   4  12   1   80.49    6.40
   4 -12  -1   84.79    7.00
  -5 -12  -1  245.38   15.00
  -5 -12  -1  260.27   14.10
  -5 -12  -1  246.28   12.70
  -5  12   1  242.28   12.20
   5 -12   1  237.78   13.70
   5 -12   1  269.67   12.50
   5  12  -1  261.37   13.30
   5  12  -1  232.78   12.50
   5  12  -1  275.27   13.30
  -5  12   1  261.97   12.70
   5  12  -1  262.67   12.80
   5 -12   1  262.07   13.30
  -5 -12  -1  259.47   13.00
  -5 -12  -1  239.58   13.80
  -5 -12  -1  240.58   16.90
  -5 -12   1  235.38   12.30
   5  12   1  272.37   12.50
  -5 -12   1  251.97   14.10
  -5  12  -1  254.37   13.20
  -5 -12   1  235.58   14.50
   5  12   1  254.27   13.00
   5 -12  -1  259.47   13.40
  -5 -12   1  255.77   12.70
   5 -12  -1  234.58   15.60
   5  12   1  250.77   13.00
  -5 -12   1  240.18   13.80
   5 -12  -1  252.97   12.70
   5  12   1  242.18   12.50
  -5  12  -1  254.67   12.50
   5 -12  -1  236.78   13.60
  -6  12   1   28.60    4.00
  -6 -12  -1   24.30    4.90
   6  12  -1   23.50    3.90
  -6 -12  -1   29.40    6.50
   6 -12   1   32.80    6.40
  -6 -12  -1   27.30    5.00
  -6 -12  -1   23.40    3.80
  -6  12   1   28.60    4.20
   6  12  -1   21.40    4.20
   6 -12   1   26.90    4.80
   6 -12   1   24.20    4.40
  -6 -12  -1   26.20    6.50
  -6 -12  -1   31.60    4.70
   6  12  -1   33.00    4.80
   6 -12   1   32.10    4.40
  -6 -12   1   35.50    5.60
  -6 -12   1   26.70    6.30
   6  12   1   25.60    4.30
   6 -12  -1   28.50    4.50
  -6 -12   1   32.00    4.40
   6 -12  -1   23.90    4.30
  -6 -12   1   23.50    3.70
  -6  12  -1   29.00    4.70
  -6  12  -1   31.10    4.20
   6 -12  -1   37.90    5.50
  -6 -12   1   33.30    5.50
   6  12   1   27.90    3.90
   6 -12  -1   36.80    7.30
   6  12   1   31.50    4.60
   7  12  -1   29.10    4.40
   7 -12   1   24.40    4.70
  -7  12   1   34.70    4.70
  -7 -12  -1   23.10    4.10
  -7 -12  -1   26.20    4.10
  -7 -12  -1   30.30    7.00
   7  12  -1   26.30    4.80
  -7 -12  -1   33.30    5.50
   7 -12   1   33.50    4.60
  -7 -12  -1   29.30    5.40
   7 -12   1   27.30    4.90
   7  12  -1   21.20    4.10
   7 -12  -1   30.20    5.10
  -7  12  -1   33.70    5.00
  -7 -12   1   40.90    5.20
   7 -12  -1   28.20    4.60
   7  12   1   31.70    4.30
  -7 -12   1   28.50    5.40
   7  12   1   28.10    4.40
  -7 -12   1   27.80    5.10
  -7 -12   1   27.70    6.60
   7 -12  -1   34.50    7.40
   7  12   1   31.10    5.00
  -7 -12   1   31.60    4.40
   7 -12  -1   35.60    5.70
   8  12  -1   65.29    6.10
   8 -12   1   70.79    6.20
  -8 -12  -1   76.69    7.40
  -8 -12  -1   72.69    6.20
   8 -12   1   64.39    7.50
  -8 -12  -1   67.39    7.90
   8  12  -1   73.19    7.80
   8  12  -1   75.39    6.40
  -8  12   1   70.19    6.30
   8 -12   1   61.59    7.40
  -8 -12  -1   73.19    6.20
  -8 -12  -1   73.89   10.80
  -8 -12   1   73.29    7.20
  -8  12  -1   63.49    7.40
  -8 -12   1   73.19    8.80
  -8 -12   1   69.49    8.10
   8  12   1   62.39    5.70
   8  12   1   70.59    7.70
   8 -12  -1   65.09    7.60
   8  12   1   66.89    6.90
   8 -12  -1   67.69   10.50
   8 -12  -1   70.19    7.90
   8 -12  -1   74.39    6.60
  -8 -12   1   55.89    6.10
  -8 -12   1   68.69    6.90
   9 -12   1  145.89    9.90
  -9  12   1  170.48   10.70
   9  12  -1  159.58   10.30
  -9  12   1  151.38   10.20
  -9 -12  -1  170.08   10.40
  -9 -12  -1  163.58   11.50
  -9 -12  -1  174.48   14.20
  -9 -12  -1  156.48   10.10
   9  12  -1  171.78   10.50
   9  12  -1  145.49   10.60
  -9 -12  -1  160.18   11.60
   9  12   1  164.38   10.90
   9  12   1  161.88   10.00
  -9  12  -1  158.78   10.70
  -9 -12   1  174.48   10.20
  -9 -12   1  146.29   12.80
  -9 -12   1  160.48    9.90
  -9  12  -1  182.28   11.60
  -9 -12   1  166.28   11.50
   9 -12  -1  172.58   11.50
  -9 -12   1  160.58   11.20
   9 -12  -1  159.18   10.90
   9 -12  -1  140.29   10.00
   9  12   1  157.78    9.90
  10  12  -1  112.09    9.30
 -10  12   1  130.49   10.40
  10 -12   1  110.89    8.60
 -10 -12  -1  112.19   12.10
  10  12  -1  111.39    8.50
 -10 -12  -1  114.19    9.60
 -10  12   1  110.19    8.70
 -10 -12  -1  104.89    8.20
 -10 -12  -1  116.49    9.60
 -10 -12  -1  115.49    8.70
  10  12  -1  109.19    8.70
 -10  12   1  121.19    9.00
  10 -12  -1  107.69    9.70
  10  12   1  106.59    8.30
 -10  12  -1  133.69   10.00
 -10 -12   1  103.09    9.30
 -10  12  -1  102.89    8.60
 -10 -12   1  108.39   11.40
 -10 -12   1  110.99    9.20
  10 -12  -1  122.19    9.20
 -10  12  -1  113.59   10.20
  10  12   1  112.19    8.30
 -10 -12   1  127.39    8.70
  10  12   1  102.69    8.80
 -10 -12   1   98.39    7.80
  11  12  -1   54.89    7.00
  11  12  -1   61.19    7.60
 -11  12   1   56.69    8.30
 -11 -12  -1   62.89   10.50
 -11 -12  -1   58.59    6.90
 -11  12   1   57.09    7.00
  11 -12   1   54.49    7.10
 -11 -12  -1   68.89    7.80
 -11  12   1   56.39    7.30
  11  12  -1   56.99    7.70
 -11 -12  -1   50.99    7.50
 -11 -12  -1   52.59    7.80
 -11 -12   1   65.09   10.30
 -11 -12   1   49.40    7.60
 -11  12  -1   50.79    7.90
  11  12   1   59.29    7.10
 -11 -12   1   47.20    6.40
 -11 -12   1   49.99    6.30
 -11 -12   1   60.39    8.20
  11  12   1   52.99    7.20
 -11  12  -1   53.19    7.10
 -11  12  -1   60.59    8.20
  11 -12  -1   52.29    7.40
 -12  12   1   23.20    5.90
 -12 -12  -1   26.40    5.30
  12  12  -1   23.80    5.90
 -12 -12  -1   26.60    5.30
 -12  12   1   22.40    4.70
 -12  12   1   31.80    6.30
 -12 -12  -1   26.90    7.80
 -12 -12  -1   30.90    6.70
  12  12  -1   24.40    5.40
  12 -12   1   28.80    5.60
 -12  12  -1   28.90    6.30
 -12 -12   1   21.30    4.50
 -12  12  -1   19.80    5.70
  12  12   1   19.40    5.10
  12  12   1   31.40    5.50
 -12  12  -1   37.30    5.90
 -12 -12   1   31.50    7.90
  12 -12  -1   21.80    5.30
 -12 -12   1   27.50    6.20
 -12 -12   1   31.40    5.10
 -13  12   1  160.28   12.70
  13  12  -1  160.38   11.20
 -13 -12  -1  152.68   15.20
  13  12  -1  141.69   11.70
 -13 -12  -1  143.79   10.50
  13 -12   1  151.18   11.50
 -13 -12  -1  118.49   11.60
 -13  12   1  130.89   11.30
 -13  12   1  137.69   10.30
 -13 -12  -1  176.48   11.50
 -13  12  -1  137.89   12.10
 -13 -12   1  150.38   10.60
 -13 -12   1  149.99   12.70
  13  12   1  140.89   11.40
  13 -12  -1  142.19   11.70
 -13 -12   1  143.59   10.60
 -13  12  -1  163.38   12.80
 -13 -12   1  141.69   14.00
  13  12   1  163.18   11.10
 -13  12  -1  153.28   10.90
 -14 -12  -1   71.89   10.40
 -14 -12  -1   65.39    8.20
 -14 -12  -1   85.59    9.40
 -14 -12  -1   89.79   13.80
 -14  12   1   74.89   10.40
 -14  12   1   70.59    9.80
 -14  12   1   83.39    9.20
  14  12  -1   57.19    8.80
  14 -12   1   75.09    9.70
  14  12  -1   65.59    8.90
 -14 -12   1   78.69   10.60
 -14 -12   1   84.39   12.80
 -14 -12   1   80.99    8.90
 -14  12  -1   67.69    8.50
 -14  12  -1   75.49   10.50
 -14 -12   1   84.09    9.10
  14  12   1   79.79    9.40
  14 -12  -1   81.69   10.30
  14  12   1   72.19    9.80
 -14  12  -1   75.59   10.60
  15  12  -1    6.90    4.10
 -15  12   1    3.30    3.70
 -15  12   1   -0.30    3.40
  15 -12   1    9.90    4.50
 -15 -12  -1    2.80    3.20
  15  12  -1    2.10    4.40
 -15  12   1    6.50    3.60
 -15 -12  -1    4.50    3.80
 -15 -12  -1    4.30    3.50
 -15 -12  -1    5.20    4.80
  15 -12  -1   10.10    4.70
 -15  12  -1    0.30    4.20
 -15 -12   1   11.50    4.60
 -15  12  -1    7.90    4.20
 -15 -12   1    0.60    3.10
 -15 -12   1    2.70    3.30
 -15  12  -1   10.00    4.90
 -15 -12   1    6.70    4.40
  15  12   1    4.60    4.00
  15  12   1    4.40    4.00
 -16 -12  -1   25.40    8.50
  16  12  -1   37.80    7.50
 -16  12   1   26.10    5.80
 -16 -12  -1   24.20    6.50
  16 -12   1   31.20    6.70
  16  12  -1   21.70    6.20
 -16 -12  -1   28.60    6.00
 -16  12   1   27.40    7.50
 -16  12   1   23.40    6.70
 -16 -12  -1   21.10    5.40
 -16  12  -1   44.10    8.30
  16 -12  -1   23.60    6.30
 -16 -12   1   46.00    9.40
 -16  12  -1   44.00    8.70
 -16 -12   1   18.30    5.10
 -16 -12   1   30.30    7.20
 -16 -12   1   12.30    4.60
 -16  12  -1   28.80    6.10
  16  12   1   25.20    6.10
 -17 -12  -1    2.40    4.00
  17  12  -1   25.20    6.60
 -17 -12  -1   10.00    4.50
 -17  12   1   17.90    6.50
 -17  12   1    7.70    4.80
 -17  12   1   10.20    4.70
  17 -12   1   13.30    5.60
  17  12  -1   21.60    6.10
 -17 -12  -1   16.10    5.10
 -17 -12   1   38.90    8.60
 -17  12  -1   18.10    6.80
 -17  12  -1   22.20    6.90
 -17 -12   1   19.20    6.20
 -17 -12   1   15.10    4.80
  17 -12  -1   13.60    5.50
 -17  12  -1   12.10    5.00
 -17 -12   1   12.40    4.50
  17  12   1   14.20    5.00
 -18 -12  -1   44.70    9.70
  18  12  -1   21.00    6.70
 -18 -12  -1   11.60    5.00
  18  12  -1   21.10    6.60
  18 -12   1   20.70    6.60
 -18 -12  -1   14.40    5.50
 -18  12   1   12.20    5.10
 -18  12   1   20.00    7.40
 -18 -12  -1    9.40    5.90
 -18  12   1   16.70    6.60
 -18 -12   1   42.50    9.20
 -18 -12   1   32.30    6.20
 -18  12  -1    9.90    6.40
 -18  12  -1   11.20    5.30
 -18 -12   1   22.50    7.30
  18  12   1   15.10    5.50
 -18  12  -1   14.40    5.10
  18 -12  -1   11.10    5.80
 -18 -12   1   20.20    5.20
 -19 -12  -1    2.90    4.50
 -19  12   1   -6.70    3.90
 -19 -12  -1    0.60    5.00
 -19  12   1    7.20    5.10
 -19  12   1   -1.70    2.80
  19  12  -1   -0.10    4.40
  19 -12   1    5.20    4.80
  19  12   1    2.00    3.80
 -19 -12   1    1.80    4.30
 -19  12  -1    0.30    4.70
 -19 -12   1    4.60    4.40
 -19  12  -1   -3.50    2.80
  19 -12  -1   -6.70    3.00
 -19 -12   1    3.30    4.00
 -19  12  -1    1.20    4.00
  20  12  -1   16.70    6.20
 -20 -12  -1   27.80    7.70
 -20  12   1   27.20    6.00
 -20  12   1   19.70    8.30
 -20  12   1   41.70    8.80
  20 -12   1   11.60    6.50
 -20 -12  -1   28.80    6.70
 -20 -12   1   26.00    6.30
 -20  12  -1   21.20    6.40
  20  12   1   16.10    6.30
 -20  12  -1   12.70    6.40
 -20 -12   1   30.30    8.30
  20 -12  -1   16.70    6.50
 -20  12  -1   21.70    7.90
 -21 -12  -1    3.60    4.20
 -21  12   1    5.60    6.00
 -21 -12  -1    7.70    5.30
 -21  12   1   -4.20    2.90
 -21  12   1    1.00    5.50
  21  12  -1    5.80    4.40
  21 -12   1    2.40    5.50
 -21  12  -1   -0.90    5.50
  21  12   1   -1.70    4.00
 -21  12  -1   -3.40    4.20
 -21 -12   1    2.90    5.40
 -21  12  -1   15.60    5.40
  21 -12  -1    0.10    5.40
 -21 -12   1    4.00    4.10
  22  12  -1    1.80    4.80
  22 -12   1   10.00    6.50
 -22  12   1    7.90    4.50
 -22 -12  -1   22.40    7.20
 -22 -12  -1    6.60    4.60
 -22  12   1  -12.70    4.10
 -22  12   1   -3.70    3.60
 -22 -12   1    6.80    5.00
  22 -12  -1    2.70    5.90
 -22  12  -1    6.00    4.50
 -22  12  -1   -7.70    4.00
 -22 -12   1    1.20    5.00
  22  12   1    2.80    4.80
 -22  12  -1   -2.00    5.50
  23  12  -1    3.60    5.50
 -23  12   1   -1.50    5.70
 -23  12   1    8.20    5.30
 -23 -12  -1    4.50    4.60
 -23 -12  -1   17.40    7.00
  23 -12   1    1.70    6.20
 -23  12  -1    5.20    6.10
 -23 -12   1    3.10    4.60
  23 -12  -1    3.60    6.60
 -23  12  -1   -9.30    5.10
 -23 -12   1   -2.70    5.10
  23  12   1    2.10    4.50
 -23  12  -1    5.40    5.10
  23 -12  -1    7.30    6.30
  24 -12   1   -4.40    5.10
 -24 -12  -1   -0.30    4.00
  24  12  -1    3.80    5.00
  24 -12  -1    5.60    6.80
  24  12   1    0.20    4.50
 -24 -12   1   -2.90    3.40
   0 -13   1    0.30    1.90
   0 -13   1    1.30    1.80
   0 -13  -1    0.50    1.90
   0 -13  -1    0.30    2.40
   0 -13  -1    0.70    1.90
   0  13  -1   -1.60    1.50
   0  13   1    1.70    2.10
   0 -13   1    2.80    1.90
   0  13  -1    4.50    2.00
   0  13  -1   -1.00    1.50
   0  13   1    1.50    1.60
   0  13   1    0.20    1.80
   0 -13  -1   -1.40    1.80
   1 -13   1   38.10    4.70
  -1  13   1   32.40    4.20
   1  13  -1   45.60    5.10
  -1  13   1   31.80    4.30
   1  13  -1   35.50    4.30
  -1 -13  -1   35.60    5.10
  -1  13   1   36.20    4.70
   1 -13   1   38.70    5.60
  -1 -13  -1   33.30    5.20
  -1 -13  -1   34.90    4.70
   1  13  -1   40.00    4.50
  -1 -13  -1   50.09    6.30
   1 -13   1   45.10    6.00
  -1 -13   1   34.40    5.30
  -1  13  -1   37.40    4.80
   1  13   1   44.30    4.90
   1 -13  -1   33.30    4.60
  -1  13  -1   42.50    5.50
   1 -13  -1   48.50    6.60
   1 -13  -1   35.10    4.90
  -1  13  -1   34.60    4.50
   1 -13  -1   39.70    5.70
   1  13   1   39.50    4.70
   1 -13  -1   47.70    5.90
  -1  13  -1   43.90    5.00
  -1 -13   1   33.30    4.50
  -1 -13   1   33.70    5.20
   1  13   1   37.30    3.80
  -2 -13  -1   59.69    5.40
   2 -13   1   61.29    5.30
  -2  13   1   56.19    5.00
   2 -13   1   45.70    6.40
   2  13  -1   62.29    5.30
   2 -13   1   60.79    5.90
  -2 -13  -1   66.29    6.30
  -2  13   1   59.29    5.70
  -2 -13  -1   61.39    6.10
   2  13  -1   68.69    5.30
  -2  13   1   81.49    6.00
  -2 -13  -1   66.29    7.50
   2  13  -1   66.59    6.60
   2 -13  -1   50.79    5.70
  -2 -13   1   69.89    7.60
   2  13   1   63.89    5.50
   2 -13  -1   60.09    5.10
   2 -13  -1   71.99    5.60
  -2 -13   1   62.09    6.20
   2  13   1   60.69    5.40
  -2  13  -1   62.49    5.70
   2 -13  -1   68.99    8.20
  -2 -13   1   68.79    6.30
  -2  13  -1   66.89    6.00
   2 -13  -1   66.99    6.40
   2 -13  -1   67.59    6.20
  -2 -13   1   65.39    5.60
  -2  13  -1   63.09    6.20
   2  13   1   64.69    5.10
   3 -13   1  128.59    8.10
  -3 -13  -1  149.88   10.10
  -3 -13  -1  127.69    9.20
  -3 -13  -1  132.59    9.50
   3  13  -1  129.89    8.10
   3  13  -1  123.99    8.10
   3 -13   1  131.29    7.70
   3 -13   1  135.19    9.40
  -3  13   1  141.19    8.00
   3  13  -1  137.59    8.70
  -3  13   1  156.08    8.70
  -3 -13  -1  138.39    8.60
  -3 -13   1  137.99    9.40
   3 -13  -1  138.69    8.50
  -3  13  -1  137.39    9.20
  -3 -13   1  128.49    9.30
   3 -13  -1  112.29    9.80
  -3 -13   1  142.59    9.60
   3  13   1  134.69    8.40
   3 -13  -1  128.29    9.20
   3  13   1  134.69    7.80
  -3  13  -1  117.09    8.50
  -3 -13   1  129.99    8.40
   3  13   1  131.49    8.20
   3 -13  -1  135.39    8.00
  -3  13  -1  148.69    8.40
   4 -13   1   15.50    3.20
   4  13  -1   10.00    3.10
  -4 -13  -1   15.20    3.60
  -4  13   1   15.40    3.00
   4  13  -1   18.60    4.00
   4 -13   1   21.00    4.40
   4  13  -1   15.00    3.00
  -4 -13  -1   19.70    5.00
  -4 -13  -1   15.30    3.30
   4  13  -1   16.10    3.20
  -4 -13  -1   15.10    3.40
   4 -13   1   16.80    3.10
  -4  13   1   11.60    3.00
  -4 -13  -1    8.10    3.10
   4 -13  -1   20.60    5.40
   4 -13  -1   20.40    3.50
  -4 -13   1   14.60    3.90
   4  13   1   14.60    2.70
   4  13   1   15.70    3.50
  -4 -13   1   20.70    4.60
  -4 -13   1   18.20    3.40
  -4 -13   1   11.60    3.20
  -4  13  -1   13.70    3.70
   4 -13  -1    9.70    3.20
   4  13   1   19.60    3.70
  -4 -13   1   15.70    3.80
   4  13   1   15.80    3.50
  -4  13  -1   15.60    3.20
   4 -13  -1   18.40    3.60
  -4  13  -1   15.30    3.50
   5 -13   1   40.60    7.00
  -5 -13  -1   53.49    7.80
  -5  13   1   54.09    4.80
   5 -13   1   69.79    5.90
  -5  13   1   56.19    5.20
  -5 -13  -1   45.40    5.50
   5  13  -1   56.19    5.30
  -5 -13  -1   51.89    6.80
  -5 -13  -1   69.09   10.40
   5  13  -1   63.59    6.80
  -5 -13  -1   49.90    5.60
   5 -13   1   55.69    6.90
   5  13  -1   59.99    6.60
  -5 -13  -1   53.49    6.80
   5  13  -1   55.79    5.20
   5 -13   1   56.09    5.00
  -5 -13   1   61.69    7.30
   5 -13  -1   34.10    7.00
  -5 -13   1   59.19    6.20
  -5  13  -1   56.69    5.50
   5  13   1   68.89    5.90
   5  13   1   48.50    4.70
   5 -13  -1   55.39    5.20
  -5 -13   1   56.49    7.60
  -5 -13   1   65.09    6.40
   5 -13  -1   62.39    6.80
   5 -13  -1   48.60    6.50
  -5 -13   1   51.39    5.60
   5  13   1   61.99    6.50
   5  13   1   58.59    6.40
  -5  13  -1   61.09    6.10
   6 -13   1   57.19    5.00
   6  13  -1   50.19    5.10
  -6  13   1   50.79    4.90
  -6 -13  -1   49.70    5.70
  -6 -13  -1   41.90    7.30
  -6  13   1   52.29    5.50
   6  13  -1   54.69    6.40
   6 -13   1   44.30    6.30
  -6 -13  -1   52.09    5.00
  -6 -13  -1   53.29    9.40
  -6 -13  -1   50.39    6.70
  -6 -13  -1   57.09    6.90
   6 -13   1   47.30    8.00
   6  13  -1   56.09    6.20
  -6 -13  -1   47.00    6.10
   6 -13   1   53.39    6.40
   6 -13  -1   58.99    7.10
   6  13   1   45.90    5.10
  -6 -13   1   62.59    9.60
   6  13   1   58.19    6.30
  -6 -13   1   59.39    8.50
  -6 -13   1   43.70    6.40
   6 -13  -1   60.99    9.40
   6  13   1   56.19    6.50
  -6  13  -1   49.90    5.70
  -6  13  -1   62.69    6.70
   6 -13  -1   53.19    6.00
  -6 -13   1   50.29    5.60
   6 -13  -1   48.60    6.30
  -6 -13   1   55.39    7.10
  -6 -13   1   67.29    6.80
   6  13   1   55.29    6.00
   7  13  -1   17.70    4.00
  -7 -13  -1   15.10    5.40
  -7 -13  -1   13.10    3.20
   7  13  -1    9.30    3.00
  -7 -13  -1    9.90    3.30
   7  13  -1   15.50    4.00
  -7 -13  -1   11.30    3.00
   7 -13   1   19.50    4.40
  -7  13   1   13.70    3.30
   7 -13   1   18.00    5.60
[truncated: 9,118,632 more chars]
