# Supplementary material for: Isolable dicarbon stabilized by a single phosphine ligand
Source: Springer Nature journal article supplement (doi:10.1038/s41557-020-00579-w), 2020-11-30
Supplement: 41557_2020_579_MOESM39_ESM.mol [file 41557_2020_579_MOESM39_ESM.mol]

nchem.20030804B-comp6.mol
  ChemDraw10012002002D

 93101  0  0  0  0  0  0  0  0999 V2000
   -1.3405   -3.3319    0.0000 C   0  0  0  0  0  0  0  0  0  0  0  0
   -2.1655   -3.3319    0.0000 C   0  0  0  0  0  0  0  0  0  0  0  0
   -2.4204   -2.5473    0.0000 N   0  0  0  0  0  0  0  0  0  0  0  0
   -1.7530   -2.0624    0.0000 C   0  0  0  0  0  0  0  0  0  0  0  0
   -1.0856   -2.5473    0.0000 N   0  0  0  0  0  0  0  0  0  0  0  0
   -1.5238   -0.7625    0.0000 N   0  0  0  0  0  0  0  0  0  0  0  0
   -2.3723    0.2486    0.0000 P   0  3  0  0  0  0  0  0  0  0  0  0
   -3.1973    0.2486    0.0000 N   0  0  0  0  0  0  0  0  0  0  0  0
   -4.0457    1.2599    0.0000 C   0  0  0  0  0  0  0  0  0  0  0  0
   -3.7102    2.0136    0.0000 N   0  0  0  0  0  0  0  0  0  0  0  0
   -4.3233    2.5655    0.0000 C   0  0  0  0  0  0  0  0  0  0  0  0
   -5.0377    2.1530    0.0000 C   0  0  0  0  0  0  0  0  0  0  0  0
   -4.8662    1.3461    0.0000 N   0  0  0  0  0  0  0  0  0  0  0  0
   -2.9032    2.1851    0.0000 C   0  0  0  0  0  0  0  0  0  0  0  0
   -1.1298    0.3543    0.0000 C   0  0  0  0  0  0  0  0  0  0  0  0
   -0.9525   -0.4612    0.0000 H   0  0  0  0  0  0  0  0  0  0  0  0
   -2.0020    0.9860    0.0000 C   0  0  0  0  0  0  0  0  0  0  0  0
   -2.3512    1.5719    0.0000 C   0  0  0  0  0  0  0  0  0  0  0  0
   -1.5442    1.7435    0.0000 C   0  0  0  0  0  0  0  0  0  0  0  0
   -1.2893    2.5282    0.0000 C   0  0  0  0  0  0  0  0  0  0  0  0
   -1.8413    3.1412    0.0000 C   0  0  0  0  0  0  0  0  0  0  0  0
   -2.6483    2.9696    0.0000 C   0  0  0  0  0  0  0  0  0  0  0  0
   -3.2051   -2.2924    0.0000 C   0  0  0  0  0  0  0  0  0  0  0  0
   -3.8181   -2.8444    0.0000 C   0  0  0  0  0  0  0  0  0  0  0  0
   -4.6028   -2.5895    0.0000 C   0  0  0  0  0  0  0  0  0  0  0  0
   -4.7743   -1.7825    0.0000 C   0  0  0  0  0  0  0  0  0  0  0  0
   -4.1612   -1.2305    0.0000 C   0  0  0  0  0  0  0  0  0  0  0  0
   -3.3766   -1.4854    0.0000 C   0  0  0  0  0  0  0  0  0  0  0  0
   -5.4182    0.7331    0.0000 C   0  0  0  0  0  0  0  0  0  0  0  0
   -0.0655   -2.2159    0.0000 C   0  0  0  0  0  0  0  0  0  0  0  0
   -6.2252    0.9046    0.0000 C   0  0  0  0  0  0  0  0  0  0  0  0
   -6.7773    0.2915    0.0000 C   0  0  0  0  0  0  0  0  0  0  0  0
   -6.5223   -0.4931    0.0000 C   0  0  0  0  0  0  0  0  0  0  0  0
   -5.7153   -0.6647    0.0000 C   0  0  0  0  0  0  0  0  0  0  0  0
   -5.1633   -0.0516    0.0000 C   0  0  0  0  0  0  0  0  0  0  0  0
    0.5476   -2.7679    0.0000 C   0  0  0  0  0  0  0  0  0  0  0  0
    1.3322   -2.5130    0.0000 C   0  0  0  0  0  0  0  0  0  0  0  0
    1.5037   -1.7060    0.0000 C   0  0  0  0  0  0  0  0  0  0  0  0
    0.8906   -1.1540    0.0000 C   0  0  0  0  0  0  0  0  0  0  0  0
    0.1060   -1.4089    0.0000 C   0  0  0  0  0  0  0  0  0  0  0  0
   -0.5498    1.0128    0.0000 C   0  0  0  0  0  0  0  0  0  0  0  0
   -0.5871    1.7512    0.0000 H   0  0  0  0  0  0  0  0  0  0  0  0
    0.1006    1.0499    0.0000 O   0  0  0  0  0  0  0  0  0  0  0  0
    0.6198    0.4427    0.0000 C   0  0  0  0  0  0  0  0  0  0  0  0
   -0.2539   -1.0181    0.0000 C   0  0  0  0  0  0  0  0  0  0  0  0
   -0.1371   -0.1851    0.0000 C   0  0  0  0  0  0  0  0  0  0  0  0
   -1.0232   -1.0269    0.0000 C   0  0  0  0  0  0  0  0  0  0  0  0
    0.3760   -3.5749    0.0000 C   0  0  0  0  0  0  0  0  0  0  0  0
   -0.3895   -3.8834    0.0000 C   0  0  0  0  0  0  0  0  0  0  0  0
    0.7506   -4.3749    0.0000 C   0  0  0  0  0  0  0  0  0  0  0  0
   -3.2003    3.5827    0.0000 C   0  0  0  0  0  0  0  0  0  0  0  0
   -3.7710    2.9871    0.0000 C   0  0  0  0  0  0  0  0  0  0  0  0
   -3.4309    4.3749    0.0000 C   0  0  0  0  0  0  0  0  0  0  0  0
   -2.6061    0.7874    0.0000 C   0  0  0  0  0  0  0  0  0  0  0  0
   -2.0534    0.1736    0.0000 C   0  0  0  0  0  0  0  0  0  0  0  0
   -3.4140    0.6156    0.0000 C   0  0  0  0  0  0  0  0  0  0  0  0
   -2.7635   -0.9334    0.0000 C   0  0  0  0  0  0  0  0  0  0  0  0
   -3.3729   -1.4895    0.0000 C   0  0  0  0  0  0  0  0  0  0  0  0
   -2.9404   -0.1276    0.0000 C   0  0  0  0  0  0  0  0  0  0  0  0
   -3.6466   -3.6514    0.0000 C   0  0  0  0  0  0  0  0  0  0  0  0
   -2.8603   -3.9010    0.0000 C   0  0  0  0  0  0  0  0  0  0  0  0
   -4.2560   -4.2075    0.0000 C   0  0  0  0  0  0  0  0  0  0  0  0
   -6.4802    1.6892    0.0000 C   0  0  0  0  0  0  0  0  0  0  0  0
   -7.3047    1.7176    0.0000 C   0  0  0  0  0  0  0  0  0  0  0  0
   -6.0432    2.3890    0.0000 C   0  0  0  0  0  0  0  0  0  0  0  0
   -4.3563   -0.2231    0.0000 C   0  0  0  0  0  0  0  0  0  0  0  0
   -3.8037    0.3907    0.0000 C   0  0  0  0  0  0  0  0  0  0  0  0
   -4.1011   -1.0086    0.0000 C   0  0  0  0  0  0  0  0  0  0  0  0
    4.8297   -2.8014    0.0000 C   0  0  0  0  0  0  0  0  0  0  0  0
    7.3047   -0.3264    0.0000 C   0  0  0  0  0  0  0  0  0  0  0  0
    4.8297    2.1486    0.0000 C   0  0  0  0  0  0  0  0  0  0  0  0
    2.3547   -0.3264    0.0000 C   0  0  0  0  0  0  0  0  0  0  0  0
    4.1152   -2.3889    0.0000 C   0  0  0  0  0  0  0  0  0  0  0  0
    5.5441   -2.3889    0.0000 C   0  0  0  0  0  0  0  0  0  0  0  0
    6.8922   -1.0409    0.0000 C   0  0  0  0  0  0  0  0  0  0  0  0
    6.8922    0.3880    0.0000 C   0  0  0  0  0  0  0  0  0  0  0  0
    5.5441    1.7361    0.0000 C   0  0  0  0  0  0  0  0  0  0  0  0
    4.1152    1.7361    0.0000 C   0  0  0  0  0  0  0  0  0  0  0  0
    2.7672    0.3880    0.0000 C   0  0  0  0  0  0  0  0  0  0  0  0
    2.7672   -1.0409    0.0000 C   0  0  0  0  0  0  0  0  0  0  0  0
    4.1152   -1.5639    0.0000 C   0  0  0  0  0  0  0  0  0  0  0  0
    5.5441   -1.5639    0.0000 C   0  0  0  0  0  0  0  0  0  0  0  0
    6.0672   -1.0409    0.0000 C   0  0  0  0  0  0  0  0  0  0  0  0
    6.0672    0.3880    0.0000 C   0  0  0  0  0  0  0  0  0  0  0  0
    5.5441    0.9111    0.0000 C   0  0  0  0  0  0  0  0  0  0  0  0
    4.1152    0.9111    0.0000 C   0  0  0  0  0  0  0  0  0  0  0  0
    3.5922    0.3880    0.0000 C   0  0  0  0  0  0  0  0  0  0  0  0
    3.5922   -1.0409    0.0000 C   0  0  0  0  0  0  0  0  0  0  0  0
    4.8297   -1.1514    0.0000 C   0  0  0  0  0  0  0  0  0  0  0  0
    5.6547   -0.3264    0.0000 C   0  0  0  0  0  0  0  0  0  0  0  0
    4.8297    0.4986    0.0000 C   0  0  0  0  0  0  0  0  0  0  0  0
    4.0047   -0.3264    0.0000 C   0  0  0  0  0  0  0  0  0  0  0  0
    4.8297   -0.3264    0.0000 B   0  5  0  0  0  0  0  0  0  0  0  0
 51 52  1  0      
 51 53  1  0      
 22 51  1  0      
 54 55  1  0      
 54 56  1  0      
 18 54  1  0      
 57 58  1  0      
 57 59  1  0      
 28 57  1  0      
 60 61  1  0      
 60 62  1  0      
 24 60  1  0      
 63 64  1  0      
 63 65  1  0      
 31 63  1  0      
 66 67  1  0      
 66 68  1  0      
 35 66  1  0      
 36 48  1  0      
 40 45  1  0      
  1  2  2  0      
  2  3  1  0      
  3  4  1  0      
  4  5  1  0      
  5  1  1  0      
  4  6  2  0      
  6  7  1  0      
  7  8  1  0      
  8  9  2  0      
  9 10  1  0      
 10 11  1  0      
 11 12  2  0      
 12 13  1  0      
 13  9  1  0      
 10 14  1  0      
  7 15  1  0      
 15 16  1  0      
  7 17  1  0      
 14 18  2  0      
 18 19  1  0      
 19 20  2  0      
 20 21  1  0      
 21 22  2  0      
 22 14  1  0      
  3 23  1  0      
 23 24  2  0      
 24 25  1  0      
 25 26  2  0      
 26 27  1  0      
 27 28  2  0      
 28 23  1  0      
 13 29  1  0      
  5 30  1  0      
 29 31  2  0      
 31 32  1  0      
 32 33  2  0      
 33 34  1  0      
 34 35  2  0      
 35 29  1  0      
 30 36  2  0      
 36 37  1  0      
 37 38  2  0      
 38 39  1  0      
 39 40  2  0      
 40 30  1  0      
 15 41  2  0      
 41 42  1  0      
 41 43  1  0      
 43 44  1  0      
 45 46  1  0      
 45 47  1  0      
 48 49  1  0      
 48 50  1  0      
 73 69  2  0      
 74 69  1  0      
 75 70  2  0      
 76 70  1  0      
 77 71  2  0      
 78 71  1  0      
 79 72  2  0      
 80 72  1  0      
 81 73  1  0      
 82 74  2  0      
 83 75  1  0      
 84 76  2  0      
 85 77  1  0      
 86 78  2  0      
 87 79  1  0      
 88 80  2  0      
 89 81  2  0      
 89 82  1  0      
 90 83  2  0      
 90 84  1  0      
 91 85  2  0      
 91 86  1  0      
 92 87  2  0      
 92 88  1  0      
 93 89  1  0      
 93 90  1  0      
 93 91  1  0      
 93 92  1  0      
M  CHG  2   7   1  93  -1
M  STY  1   1 SUP
M  SLB  1   1   1
M  SAL   1  3  51  52  53
M  SBL   1  1   3
M  SMT   1 \Si\nPr
M  SBV   1   3    0.5520   -0.6131
M  STY  1   2 SUP
M  SLB  1   2   2
M  SAL   2  3  54  55  56
M  SBL   2  1   6
M  SMT   2 \Si\nPr
M  SBV   2   6    0.2549    0.7845
M  STY  1   3 SUP
M  SLB  1   3   3
M  SAL   3  3  57  58  59
M  SBL   3  1   9
M  SMT   3 \Si\nPr
M  SBV   3   9   -0.6131   -0.5520
M  STY  1   4 SUP
M  SLB  1   4   4
M  SAL   4  3  60  61  62
M  SBL   4  1  12
M  SMT   4 \Si\nPr
M  SBV   4  12   -0.1715    0.8070
M  STY  1   5 SUP
M  SLB  1   5   5
M  SAL   5  3  63  64  65
M  SBL   5  1  15
M  SMT   5 \Si\nPr
M  SBV   5  15    0.2550   -0.7846
M  STY  1   6 SUP
M  SLB  1   6   6
M  SAL   6  3  66  67  68
M  SBL   6  1  18
M  SMT   6 \Si\nPr
M  SBV   6  18   -0.8070    0.1715
M  END
